# Supplementary material for: A moderate increase in ambient temperature modulates the Atlantic cod (Gadus morhua) spleen transcriptome response to intraperitoneal viral mimic injection
Source: PubMed Central journal article supplement (PMC3534563; doi:10.1186/1471-2164-13-431), 2012-08-28
Supplement: 1471-2164-13-431-S1.pdf [file 1471-2164-13-431-S1.pdf]

Supplemental Table S1. 6 genes differentially expressed between fish exposed to chronic increases in temperature (up to 16°C) compared to fish held at 10°C

| Probe ID | d-value | Stdev | Raw p  | q-value | Fold Change <sup>a</sup> | Sequence Name         | Gene Name                                                                                                                                                                                                         |
|----------|---------|-------|--------|---------|--------------------------|-----------------------|-------------------------------------------------------------------------------------------------------------------------------------------------------------------------------------------------------------------|
| 47777    | 4.55    | 0.04  | 0.0001 | 0.1762  | 1.25                     | sb_gmnl1a_0011o17.t7  | Unassigned protein                                                                                                                                                                                                |
| 54607    | 4.37    | 0.08  | 0.0001 | 0.1762  | 1.40                     | all_v2.0.3026.C1      | unclassified                                                                                                                                                                                                      |
| 48342    | 4.28    | 0.09  | 0.0001 | 0.1762  | 1.44                     | sb_gmnl1em_0014f04.t7 | Unassigned protein                                                                                                                                                                                                |
| 49541    | 4.17    | 0.05  | 0.0001 | 0.1762  | 1.26                     | all_v2.0.17651.C1     | unclassified                                                                                                                                                                                                      |
| 43904    | 4.10    | 0.10  | 0.0002 | 0.1762  | 1.42                     | all_v2.0.16778.C1     | Zgc:65861; n=1; Danio rerio Rep: Zgc:65861 - Danio rerio (Zebrafish) (Brachydanio rerio) PREDICTED: similar to zinc finger protein; n=3; Danio rerio Rep: PREDICTED: similar to zinc finger protein - Danio rerio |
| 41261    | 4.08    | 0.08  | 0.0002 | 0.1762  | 1.35                     | sb_gmnlkfc_0004f09.t7 |                                                                                                                                                                                                                   |
| 54419    | 3.98    | 0.20  | 0.0002 | 0.1762  | 1.87                     | all_v2.0.4355.C1      | unclassified                                                                                                                                                                                                      |

<sup>a</sup>Fold-changes are presented as outputted by siggenes and were calculated as 16°C/10°C

Supplemental Table S2. 41 genes differentially expressed between fish injected with pIC or PBS at 10°C and sampled at 6HPI

| Probe Id | d-value | Stdev | Raw p  | q-value | Fold Change <sup>a</sup> | Sequence Name                          | Gene Name                                                                                                                                                                                         |
|----------|---------|-------|--------|---------|--------------------------|----------------------------------------|---------------------------------------------------------------------------------------------------------------------------------------------------------------------------------------------------|
| 45506    | 11.95   | 0.25  | 0.0000 | 0.0017  | 10.21                    | all_v2.0.9616.C1.a                     | non-directed<br>Interferon stimulated gene 15; n=1; Gadus morhua Rep: Interferon stimulated gene 15 - Gadus morhua (Atlantic cod)                                                                 |
| 38604    | 6.50    | 0.46  | 0.0000 | 0.0055  | 8.30                     | all_v2.0.14.CB2                        |                                                                                                                                                                                                   |
| 45882    | 5.28    | 0.48  | 0.0000 | 0.0111  | 5.51                     | all_v2.0.5246.C1                       | non-directed<br>Interferon stimulated gene 15; n=1; Gadus morhua Rep: Interferon stimulated gene 15 - Gadus morhua (Atlantic cod)                                                                 |
| 38605    | 7.52    | 0.28  | 0.0000 | 0.0037  | 5.40                     | all_v2.0.14.C13                        | Interferon stimulated gene 15; n=1; Gadus morhua Rep: Interferon stimulated gene 15 - Gadus morhua (Atlantic cod)                                                                                 |
| 38613    | 5.19    | 0.46  | 0.0000 | 0.0113  | 5.29                     | all_v2.0.14.CB5                        | Interferon stimulated gene 15; n=1; Gadus morhua Rep: Interferon stimulated gene 15 - Gadus morhua (Atlantic cod)                                                                                 |
| 38608    | 5.38    | 0.28  | 0.0000 | 0.0099  | 3.30                     | all_v2.0.14.C12                        | Interferon stimulated gene 15; n=1; Gadus morhua Rep: Interferon stimulated gene 15 - Gadus morhua (Atlantic cod)                                                                                 |
| 38609    | 5.03    | 0.30  | 0.0000 | 0.0127  | 3.29                     | all_v2.0.14.C3                         | Interferon stimulated gene 15; n=1; Gadus morhua Rep: Interferon stimulated gene 15 - Gadus morhua (Atlantic cod)                                                                                 |
| 44530    | 8.06    | 0.18  | 0.0000 | 0.0037  | 3.12                     | IKKAlIKEs1                             | custom - IKKA-like protein                                                                                                                                                                        |
| 44532    | 4.39    | 0.32  | 0.0001 | 0.0223  | 2.71                     | IKKAlIKEs3                             | custom - IKKA-like protein<br>Interferon stimulated gene 15; n=1; Gadus morhua Rep: Interferon stimulated gene 15 - Gadus morhua (Atlantic cod)                                                   |
| 38606    | 5.23    | 0.23  | 0.0000 | 0.0112  | 2.69                     | all_v2.0.14.CB4                        | Homolog of Homo sapiens Probable ATP-dependent helicase LGP2; n=1; Takifugu rubripes Rep: Homolog of Homo sapiens Probable ATP-dependent helicase LGP2 - Takifugu rubripes                        |
| 38285    | 5.94    | 0.18  | 0.0000 | 0.0075  | 2.44                     | sb_gmnlbfc_0007k16.t7                  | custom - NFkappaB - nuclear factor kappa-B, subunit 1                                                                                                                                             |
| 44580    | 7.40    | 0.13  | 0.0000 | 0.0037  | 2.23                     | NFkappaB1<br>sb_gmapte_0001n01.pDNRm13 |                                                                                                                                                                                                   |
| 47560    | 4.76    | 0.22  | 0.0000 | 0.0160  | 2.22                     | r                                      | Unassigned protein<br>Homolog of Homo sapiens PhosPholiPase C-like 3; n=1; Takifugu rubripes Rep: Homolog of Homo sapiens PhosPholiPase C-like 3 - Takifugu rubripes                              |
| 38260    | 5.90    | 0.16  | 0.0000 | 0.0075  | 2.19                     | all_v2.0.16638.C1                      | Cell division cycle 42; n=12; Coelomata Rep: Cell division cycle 42 - Danio rerio (Zebrafish) (Brachydanio rerio)                                                                                 |
| 36426    | 4.98    | 0.19  | 0.0000 | 0.0127  | 2.16                     | all_v2.0.8306.C2                       |                                                                                                                                                                                                   |
| 51332    | 4.88    | 0.20  | 0.0000 | 0.0142  | 2.11                     | all_v2.0.4629.C1                       | unclassified<br>PREDICTED: similar to Ubiquitin carboxyl-terminal hydrolase 5 (Ubiquitin thioesterase 5) (Ubiquitin-specific-processing protease 5) (Deubiquitinating enzyme 5) (Isopeptidase T); |
| 41181    | 4.32    | 0.21  | 0.0001 | 0.0247  | 2.04                     | all_v2.0.14519.C1                      |                                                                                                                                                                                                   |

|       |      |      |        |        |      |                                |                                                                                                                                                                                                                                  |
|-------|------|------|--------|--------|------|--------------------------------|----------------------------------------------------------------------------------------------------------------------------------------------------------------------------------------------------------------------------------|
|       |      |      |        |        |      |                                | n=2; Homo/Pan/Gorilla group Rep: PREDICTED: similar to Ubiquitin carboxyl-terminal hydrolase 5 (Ubiquitin thioesterase 5) (Ubiquitin-specific-processing protease 5) (Deubiquitinating enzyme 5) (Isopeptidase T) - Homo sapiens |
| 40721 | 5.37 | 0.16 | 0.0000 | 0.0099 | 2.04 | sb_gmnbpcic_0001i03.pDNRF2     | PREDICTED: similar to Nitric oxide synthase trafficker; n=1; Danio rerio Rep: PREDICTED: similar to Nitric oxide synthase trafficker - Danio rerio                                                                               |
| 44546 | 4.68 | 0.17 | 0.0001 | 0.0171 | 1.88 | IRF1OK4                        | custom - Interferon regulatory factor 10K Prostaglandin E synthase 3; n=5; Danio rerio Rep: Prostaglandin E synthase 3 - Danio rerio (Zebrafish) (Brachydanio rerio)                                                             |
| 41397 | 4.56 | 0.17 | 0.0001 | 0.0193 | 1.87 | all_v2.0.847.C1                | custom - IKKA-like protein                                                                                                                                                                                                       |
| 44531 | 4.56 | 0.18 | 0.0001 | 0.0193 | 1.86 | IKKAlIKE2<br>all_v2.0.10248.C1 | non-directed                                                                                                                                                                                                                     |
| 45633 | 7.80 | 0.07 | 0.0000 | 0.0037 | 1.77 | all_v2.0.8631.C1               | unclassified                                                                                                                                                                                                                     |
| 55108 | 4.51 | 0.15 | 0.0001 | 0.0198 | 1.73 | all_v2.0.1745.C2               | Chemokine CXC-like protein; n=1; Psetta maxima Rep: Chemokine CXC-like protein - Scophthalmus maximus (Turbot)                                                                                                                   |
| 36482 | 6.69 | 0.09 | 0.0000 | 0.0055 | 1.71 | sb_gmnulla_0015121.t7          | Unassigned protein                                                                                                                                                                                                               |
| 48012 | 4.12 | 0.13 | 0.0002 | 0.0330 | 1.60 | sb_gmnbgi_0003c04.pDNRF2       | Calumenin b; n=3; Otophysi Rep: Calumenin b - Danio rerio (Zebrafish) (Brachydanio rerio)                                                                                                                                        |
| 36286 | 4.75 | 0.11 | 0.0000 | 0.0160 | 1.58 | all_v2.0.12538.C1              | unclassified                                                                                                                                                                                                                     |
| 50297 | 5.01 | 0.10 | 0.0000 | 0.0127 | 1.57 | sb_gmnbhkas_0007i12.pDNRF2     | Novel immune-type receptor 4; n=2; Oncorhynchus mykiss Rep: Novel immune-type receptor 4 - Oncorhynchus mykiss (Rainbow trout) (Salmo gairdneri)                                                                                 |
| 39371 | 4.86 | 0.09 | 0.0000 | 0.0142 | 1.52 | sb_gmapov_0007g07.pDNRM13r     | Homolog of Brachydanio rerio Nucleolin; n=1; Takifugu rubripes Rep: Homolog of Brachydanio rerio Nucleolin. - Takifugu rubripes                                                                                                  |
| 37749 | 4.99 | 0.09 | 0.0000 | 0.0127 | 1.50 | sb_gmnbhkas_0014f23.pDNRM13r   | Unassigned protein                                                                                                                                                                                                               |
| 48214 | 4.52 | 0.09 | 0.0001 | 0.0198 | 1.47 | sb_gmnlem_0025k19.t7           | Unassigned protein                                                                                                                                                                                                               |
| 48591 | 5.03 | 0.08 | 0.0000 | 0.0127 | 1.46 | NFkappaB2                      | custom - NFkappaB - nuclear factor kappa-B, subunit 2                                                                                                                                                                            |
| 44581 | 4.64 | 0.09 | 0.0001 | 0.0179 | 1.46 | all_v2.0.894.C5                | Homolog of Homo sapiens Deoxyribonuclease gamma precursor; n=1; Takifugu rubripes Rep: Homolog of Homo sapiens Deoxyribonuclease gamma precursor - Takifugu rubripes                                                             |
| 38042 | 4.44 | 0.09 | 0.0001 | 0.0210 | 1.45 | all_v2.0.4460.C1               | unclassified                                                                                                                                                                                                                     |
| 49081 | 4.29 | 0.10 | 0.0001 | 0.0260 | 1.45 | all_v2.0.2007.C1               | unclassified                                                                                                                                                                                                                     |
| 52297 | 4.23 | 0.09 | 0.0001 | 0.0285 | 1.42 | sb_gmnbmd_0010f21.pDNRF2       | G-cadherin [Lytechinus variegatus]                                                                                                                                                                                               |
| 44822 | 4.87 | 0.05 | 0.0000 | 0.0142 | 1.30 |                                |                                                                                                                                                                                                                                  |

|       |       |      |        |        |      |                                    |                                                                                                                        |
|-------|-------|------|--------|--------|------|------------------------------------|------------------------------------------------------------------------------------------------------------------------|
| 37564 | -5.47 | 0.08 | 0.0000 | 0.0099 | 0.67 | all_v2.0.16020.<br>C1              | Heat shock protein 90; n=13; Euteleostomi Rep:<br>Heat shock protein 90 - Scophthalmus maximus<br>(Turbot)             |
| 41731 | -6.17 | 0.09 | 0.0000 | 0.0065 | 0.60 | sb_gmnblits_00<br>01b02.pDNRF2     | Renin binding protein; n=2; Danio rerio Rep:<br>Renin binding protein - Brachydanio rerio<br>(Zebrafish) (Danio rerio) |
| 46438 | -5.43 | 0.31 | 0.0000 | 0.0099 | 0.30 | all_v2.0.15803.<br>C1              | Unassigned protein                                                                                                     |
| 46031 | -5.01 | 0.33 | 0.0000 | 0.0127 | 0.30 | sb_gmnbspic_0<br>004i16.pDNRF<br>2 | PREDICTED: similar to CG3168-PA, isoform A<br>[Tribolium castaneum]                                                    |
| 49256 | -6.60 | 0.46 | 0.0000 | 0.0055 | 0.09 | all_v2.0.8761.C<br>1               | unclassified                                                                                                           |

<sup>a</sup>Fold-changes are presented as outputted by siggenes and were calculated as pIC/PBS

Supplemental Table S3. 656 genes differentially expressed between fish injected with pIC or PBS at 16°C and sampled at 6HPI

| Probe ID | d-value | Stdev | Raw p  | q-value | Fold Change <sup>a</sup> | Sequence Name                      | Gene Name                                                                                                                                                                                                                                                                                                                                                   |
|----------|---------|-------|--------|---------|--------------------------|------------------------------------|-------------------------------------------------------------------------------------------------------------------------------------------------------------------------------------------------------------------------------------------------------------------------------------------------------------------------------------------------------------|
| 38613    | 7.59    | 0.64  | 0.0000 | 0.0013  | 55.97                    | all_v2.0.14.C<br>B5                | Interferon stimulated gene 15; n=1; Gadus morhua Rep: Interferon stimulated gene 15 - Gadus morhua (Atlantic cod)                                                                                                                                                                                                                                           |
| 38604    | 9.23    | 0.56  | 0.0000 | 0.0013  | 46.95                    | all_v2.0.14.C<br>B2                | Interferon stimulated gene 15; n=1; Gadus morhua Rep: Interferon stimulated gene 15 - Gadus morhua (Atlantic cod)                                                                                                                                                                                                                                           |
| 38605    | 11.84   | 0.34  | 0.0000 | 0.0013  | 33.66                    | all_v2.0.14.C<br>13                | Interferon stimulated gene 15; n=1; Gadus morhua Rep: Interferon stimulated gene 15 - Gadus morhua (Atlantic cod)                                                                                                                                                                                                                                           |
| 44448    | 8.01    | 0.47  | 0.0000 | 0.0013  | 24.34                    | CK10ad                             | custom - CC chemokine                                                                                                                                                                                                                                                                                                                                       |
| 38608    | 11.94   | 0.28  | 0.0000 | 0.0013  | 20.46                    | all_v2.0.14.C<br>12                | Interferon stimulated gene 15; n=1; Gadus morhua Rep: Interferon stimulated gene 15 - Gadus morhua (Atlantic cod)                                                                                                                                                                                                                                           |
| 44453    | 7.42    | 0.49  | 0.0000 | 0.0013  | 19.44                    | CK10a                              | custom - CC chemokine                                                                                                                                                                                                                                                                                                                                       |
| 38609    | 8.60    | 0.40  | 0.0000 | 0.0013  | 17.72                    | all_v2.0.14.C<br>3                 | Interferon stimulated gene 15; n=1; Gadus morhua Rep: Interferon stimulated gene 15 - Gadus morhua (Atlantic cod)                                                                                                                                                                                                                                           |
| 38606    | 9.14    | 0.34  | 0.0000 | 0.0013  | 15.91                    | all_v2.0.14.C<br>B4                | Interferon stimulated gene 15; n=1; Gadus morhua Rep: Interferon stimulated gene 15 - Gadus morhua (Atlantic cod)                                                                                                                                                                                                                                           |
| 38356    | 4.85    | 0.69  | 0.0000 | 0.0017  | 12.54                    | all_v2.0.415.<br>C6                | Homolog of Homo sapiens Spastic ataxia of Charlevoix-Saguenay; n=1; Takifugu rubripes Rep: Homolog of Homo sapiens Spastic ataxia of Charlevoix-Saguenay - Takifugu rubripes                                                                                                                                                                                |
| 45882    | 8.24    | 0.35  | 0.0000 | 0.0013  | 12.17                    | all_v2.0.5246<br>.C1               | non-directed                                                                                                                                                                                                                                                                                                                                                |
| 44590    | 8.83    | 0.33  | 0.0000 | 0.0013  | 11.97                    | DXH4a                              | custom - probable ATP-dependent RNA helicase DHX                                                                                                                                                                                                                                                                                                            |
| 38675    | 5.71    | 0.56  | 0.0000 | 0.0014  | 11.87                    | all_v2.0.9761<br>.C1               | Isoform S of Q761C6 ; n=1; Rattus norvegicus Rep: Isoform S of Q761C6 - Rattus norvegicus (Rat)                                                                                                                                                                                                                                                             |
| 38611    | 6.93    | 0.39  | 0.0000 | 0.0013  | 10.84                    | all_v2.0.1767<br>.C1               | Interferon stimulated gene 15; n=1; Gadus morhua Rep: Interferon stimulated gene 15 - Gadus morhua (Atlantic cod)                                                                                                                                                                                                                                           |
| 38614    | 10.91   | 0.23  | 0.0000 | 0.0013  | 10.76                    | all_v2.0.7062<br>.C2               | Interferon stimulated gene 15; n=1; Gadus morhua Rep: Interferon stimulated gene 15 - Gadus morhua (Atlantic cod)                                                                                                                                                                                                                                           |
| 38603    | 6.14    | 0.50  | 0.0000 | 0.0013  | 10.35                    | all_v2.0.14.C<br>B7                | Interferon stimulated gene 15; n=1; Gadus morhua Rep: Interferon stimulated gene 15 - Gadus morhua (Atlantic cod)                                                                                                                                                                                                                                           |
| 44180    | 6.44    | 0.47  | 0.0000 | 0.0013  | 10.20                    | all_v2.0.1266<br>.C1               | ZPC4; n=2; Oryzias latipes Rep: ZPC4 - Oryzias latipes (Medaka fish) (Japanese ricefish)                                                                                                                                                                                                                                                                    |
| 48390    | 4.12    | 0.65  | 0.0001 | 0.0025  | 9.94                     | all_v2.0.1535<br>4.C1              | Unassigned protein                                                                                                                                                                                                                                                                                                                                          |
| 40869    | 2.75    | 0.91  | 0.0012 | 0.0178  | 9.54                     | sb_gmnbspic<br>_0014p07.pD<br>NRF2 | PREDICTED: similar to Pre-mRNA processing splicing factor 8 (Splicing factor Prp8) (PRP8 homolog) (220 kDa U5 snRNP-specific protein) (p220) isoform 13; n=4; Deuterostomia Rep: PREDICTED: similar to Pre-mRNA processing splicing factor 8 (Splicing factor Prp8) (PRP8 homolog) (220 kDa U5 snRNP-specific protein) (p220) isoform 13 - Canis familiaris |
| 39328    | 4.61    | 0.71  | 0.0000 | 0.0018  | 9.05                     | all_v2.0.2213<br>.C1               | NFX1-type zinc finger-containing protein 1; n=5; Eutheria Rep: NFX1-type zinc finger-containing protein 1 - Homo sapiens (Human)                                                                                                                                                                                                                            |
| 41316    | 7.29    | 0.38  | 0.0000 | 0.0013  | 8.89                     | all_v2.0.1009<br>.C5               | Probable ATP-dependent helicase LGP2 (EC 3.6.1.-) (Protein D11Lgp2 homolog).; n=1; Takifugu rubripes Rep: Probable ATP-dependent helicase LGP2 (EC 3.6.1.-) (Protein D11Lgp2 homolog). - Takifugu rubripes                                                                                                                                                  |
| 44589    | 3.57    | 1.12  | 0.0001 | 0.0047  | 8.69                     | DXH3b                              | custom - probable ATP-dependent RNA helicase DHX                                                                                                                                                                                                                                                                                                            |

|       |      |      |        |        |      |                          |                                                                                                                                                                                                                                                                                                                                 |
|-------|------|------|--------|--------|------|--------------------------|---------------------------------------------------------------------------------------------------------------------------------------------------------------------------------------------------------------------------------------------------------------------------------------------------------------------------------|
| 38651 | 5.24 | 0.50 | 0.0000 | 0.0016 | 8.51 | sb_gmapht_023a03.pDN RF2 | Intraflagellar transport protein 52; n=4; Danio rerio Rep: Intraflagellar transport protein 52 - Brachydanio rerio (Zebrafish) (Danio rerio)                                                                                                                                                                                    |
| 45361 | 6.50 | 0.39 | 0.0000 | 0.0013 | 8.25 | all_v2.0.34.C2           | LOC797694; similar to solute carrier family 25 member 5 protein<br>PREDICTED: similar to zinc finger, NFX1-type containing 1; n=3; Laurasiatheria Rep:                                                                                                                                                                          |
| 41269 | 6.26 | 0.44 | 0.0000 | 0.0013 | 8.18 | sb_gmnlbfc_0004o20.t7    | PREDICTED: similar to zinc finger, NFX1-type containing 1 - Equus caballus<br>VHSV-induced protein; n=1; Oncorhynchus mykiss Rep: VHSV-induced protein -                                                                                                                                                                        |
| 43196 | 7.47 | 0.33 | 0.0000 | 0.0013 | 8.03 | all_v2.0.3448.C3         | Oncorhynchus mykiss (Rainbow trout) (Salmo gairdneri)<br>Interleukin-8 variant 2; n=3; Ictalurus punctatus Rep: Interleukin-8 variant 2 - Ictalurus punctatus (Channel catfish)                                                                                                                                                 |
| 38639 | 5.19 | 0.44 | 0.0000 | 0.0016 | 7.60 | all_v2.0.638.CB1         | Interleukin-8 variant 2; n=3; Ictalurus punctatus Rep: Interleukin-8 variant 2 - Ictalurus punctatus (Channel catfish)                                                                                                                                                                                                          |
| 38638 | 3.42 | 0.86 | 0.0002 | 0.0059 | 7.30 | all_v2.0.638.C1          | Interleukin-8 variant 2; n=3; Ictalurus punctatus Rep: Interleukin-8 variant 2 - Ictalurus punctatus (Channel catfish)                                                                                                                                                                                                          |
| 38354 | 5.87 | 0.41 | 0.0000 | 0.0014 | 7.26 | all_v2.0.707.C4          | Homolog of Homo sapiens Spastic ataxia of Charlevoix-Saguenay; n=1; Takifugu rubripes Rep: Homolog of Homo sapiens Spastic ataxia of Charlevoix-Saguenay - Takifugu rubripes<br>Homolog of Homo sapiens Spastic ataxia of Charlevoix-Saguenay; n=1; Takifugu rubripes Rep:                                                      |
| 38358 | 4.87 | 0.53 | 0.0000 | 0.0017 | 6.97 | all_v2.0.9190.C1         | Homolog of Homo sapiens Spastic ataxia of Charlevoix-Saguenay - Takifugu rubripes                                                                                                                                                                                                                                               |
| 46200 | 5.00 | 0.51 | 0.0000 | 0.0016 | 6.94 | all_v2.0.1457.5.C1       | SACS; saesin                                                                                                                                                                                                                                                                                                                    |
| 49247 | 8.01 | 0.26 | 0.0000 | 0.0013 | 6.92 | all_v2.0.7226.C1         | unclassified                                                                                                                                                                                                                                                                                                                    |
| 43201 | 6.31 | 0.35 | 0.0000 | 0.0013 | 6.89 | all_v2.0.9330.C1         | Viperin-like protein; n=1; Channa argus Rep: Viperin-like protein - Channa argus (snakehead) custom - probable ATP-dependent RNA helicase DHX                                                                                                                                                                                   |
| 44588 | 8.41 | 0.25 | 0.0000 | 0.0013 | 6.74 | DXH2b                    |                                                                                                                                                                                                                                                                                                                                 |
| 50762 | 4.05 | 0.58 | 0.0001 | 0.0026 | 6.70 | all_v2.0.1609.C1         | unclassified                                                                                                                                                                                                                                                                                                                    |
| 38612 | 8.09 | 0.25 | 0.0000 | 0.0013 | 6.65 | all_v2.0.14.CB3          | Interferon stimulated gene 15; n=1; Gadus morhua Rep: Interferon stimulated gene 15 - Gadus morhua (Atlantic cod)<br>Probable ATP-dependent helicase LGP2 (EC 3.6.1.-) (Protein D11Lgp2 homolog).; n=1; Takifugu rubripes Rep: Probable ATP-dependent helicase LGP2 (EC 3.6.1.-) (Protein D11Lgp2 homolog). - Takifugu rubripes |
| 41314 | 7.62 | 0.26 | 0.0000 | 0.0013 | 6.60 | all_v2.0.5598.C1         | Interferon-inducible GTPase 5 (EC 3.6.5.-) (Immunity-related GTPase cinema 1).; n=3; Takifugu rubripes Rep: Interferon-inducible GTPase 5 (EC 3.6.5.-) (Immunity-related GTPase cinema 1). - Takifugu rubripes                                                                                                                  |
| 38617 | 5.51 | 0.43 | 0.0000 | 0.0014 | 6.53 | all_v2.0.1318.8.C1       |                                                                                                                                                                                                                                                                                                                                 |
| 47384 | 4.97 | 0.48 | 0.0000 | 0.0016 | 6.50 | all_v2.0.707.C1          | Unassigned protein<br>VHSV-induced protein; n=1; Oncorhynchus mykiss Rep: VHSV-induced protein -                                                                                                                                                                                                                                |
| 43197 | 4.77 | 0.54 | 0.0000 | 0.0017 | 6.41 | all_v2.0.3448.C4         | Oncorhynchus mykiss (Rainbow trout) (Salmo gairdneri)                                                                                                                                                                                                                                                                           |
| 47164 | 4.98 | 0.52 | 0.0000 | 0.0016 | 6.26 | all_v2.0.6027.C6         | Unassigned protein<br>Homolog of Homo sapiens Spastic ataxia of Charlevoix-Saguenay; n=1; Takifugu rubripes Rep:                                                                                                                                                                                                                |
| 38357 | 4.77 | 0.52 | 0.0000 | 0.0017 | 6.04 | all_v2.0.8243.C1         | Homolog of Homo sapiens Spastic ataxia of Charlevoix-Saguenay - Takifugu rubripes                                                                                                                                                                                                                                               |
| 46199 | 7.50 | 0.25 | 0.0000 | 0.0013 | 5.65 | all_v2.0.2412.C1         | SACS; saesin                                                                                                                                                                                                                                                                                                                    |
| 44543 | 7.56 | 0.24 | 0.0000 | 0.0013 | 5.57 | IRF10K1                  | custom - Interferon regulatory factor 10K<br>Homolog of Homo sapiens Spastic ataxia of Charlevoix-Saguenay; n=1; Takifugu rubripes Rep:                                                                                                                                                                                         |
| 38359 | 4.64 | 0.47 | 0.0000 | 0.0018 | 5.43 | all_v2.0.415.C5          | Homolog of Homo sapiens Spastic ataxia of Charlevoix-Saguenay - Takifugu rubripes                                                                                                                                                                                                                                               |

|       |      |      |        |        |      |                                    |                                                                                                                                                                                                                        |
|-------|------|------|--------|--------|------|------------------------------------|------------------------------------------------------------------------------------------------------------------------------------------------------------------------------------------------------------------------|
| 45506 | 6.13 | 0.32 | 0.0000 | 0.0013 | 5.39 | all_v2.0.9616<br>.C1.a             | non-directed                                                                                                                                                                                                           |
| 44859 | 3.79 | 0.70 | 0.0001 | 0.0036 | 5.28 | all_v2.0.314.<br>C1                | HECT domain containing protein<br>Homolog of Homo sapiens Probable ATP-<br>dependent helicase LGP2; n=1; Takifugu<br>rubripes Rep: Homolog of Homo sapiens Probable<br>ATP-dependent helicase LGP2 - Takifugu rubripes |
| 38285 | 9.14 | 0.18 | 0.0000 | 0.0013 | 5.13 | sb_gmnlbfc_<br>0007k16.t7          | Interferon regulatory factor 1; n=1; Channa<br>argus Rep: Interferon regulatory factor 1 - Channa<br>argus (snakehead)                                                                                                 |
| 38598 | 7.11 | 0.25 | 0.0000 | 0.0013 | 5.09 | all_v2.0.1580<br>.C7               | Homolog of Homo sapiens PhosPholiPase C-like<br>3; n=1; Takifugu rubripes Rep: Homolog of Homo<br>sapiens PhosPholiPase C-like 3 - Takifugu<br>rubripes                                                                |
| 38260 | 8.18 | 0.20 | 0.0000 | 0.0013 | 5.08 | all_v2.0.1663<br>8.C1              | Serine hydrolase-like protein 2 (EC 3.1.-.); n=1;<br>Takifugu rubripes Rep: Serine hydrolase-like<br>protein 2 (EC 3.1.-.) - Takifugu rubripes                                                                         |
| 42073 | 6.13 | 0.28 | 0.0000 | 0.0013 | 5.04 | all_v2.0.1525<br>4.C1              | Unassigned protein                                                                                                                                                                                                     |
| 48563 | 2.75 | 0.96 | 0.0012 | 0.0177 | 5.03 | sb_gmnlbfc_<br>11n07.t7            | Unassigned protein                                                                                                                                                                                                     |
| 47410 | 6.83 | 0.26 | 0.0000 | 0.0013 | 4.95 | sb_gmnlbfc_<br>0004h02.t7          | Unassigned protein                                                                                                                                                                                                     |
| 47329 | 3.44 | 0.77 | 0.0002 | 0.0057 | 4.88 | all_v2.0.415.<br>C3                | Unassigned protein                                                                                                                                                                                                     |
| 46226 | 4.71 | 0.40 | 0.0000 | 0.0018 | 4.79 | all_v2.0.415.<br>C1                | Serpentine_recp domain containing protein<br>custom - probable ATP-dependent RNA helicase<br>DHX                                                                                                                       |
| 44584 | 3.81 | 0.62 | 0.0001 | 0.0036 | 4.76 | DXH1a                              | Cardiac troponin T; n=14; Danio rerio Rep:<br>Cardiac troponin T - Danio rerio (Zebrafish)<br>(Brachydanio rerio)                                                                                                      |
| 36311 | 5.07 | 0.40 | 0.0000 | 0.0016 | 4.75 | all_v2.0.1220<br>6.C1              | custom - Interferon regulatory factor 10K                                                                                                                                                                              |
| 44546 | 5.08 | 0.38 | 0.0000 | 0.0016 | 4.74 | IRF1OK4<br>all_v2.0.1535<br>9.C1   | zp3a.1; zona pellucida glycoprotein 3a.1                                                                                                                                                                               |
| 55535 | 2.50 | 0.64 | 0.0025 | 0.0264 | 4.68 | sb_gmnbmd_<br>0010a21.pDN<br>Rm13r | Sacs_predicted; sacs (predicted)<br>Actin-binding vascular maintenance protein; n=5;<br>Danio rerio Rep: Actin-binding vascular<br>maintenance protein - Danio rerio (Zebrafish)<br>(Brachydanio rerio)                |
| 35753 | 5.35 | 0.31 | 0.0000 | 0.0015 | 4.59 | sb_gmnlrsas_<br>0003g09.t7         | PREDICTED: similar to Rhomboid, veinlet-like 7<br>(Drosophila); n=1; Danio rerio Rep: PREDICTED:<br>similar to Rhomboid, veinlet-like 7 (Drosophila) -<br>Danio rerio                                                  |
| 40939 | 3.55 | 0.46 | 0.0002 | 0.0049 | 4.47 | all_v2.0.910.<br>C2                | Bcl2l10 protein; n=2; Danio rerio Rep: Bcl2l10<br>protein - Danio rerio (Zebrafish) (Brachydanio<br>rerio)                                                                                                             |
| 36121 | 4.71 | 0.41 | 0.0000 | 0.0018 | 4.44 | all_v2.0.5784<br>.C1               | Ribosomal protein L32; n=4; Euteleostei Rep:<br>Ribosomal protein L32 - Epinephelus coioides<br>(Orange-spotted grouper)                                                                                               |
| 41892 | 2.44 | 0.83 | 0.0030 | 0.0296 | 4.34 | sb_gmlbgits_<br>0002g20.t7         | Hepcidin; n=1; Pseudosciaena crocea (Croceine<br>croaker) Rep: Hepcidin - Pseudosciaena crocea<br>(Croceine croaker)                                                                                                   |
| 37609 | 3.06 | 0.58 | 0.0005 | 0.0105 | 4.30 | all_v2.0.796.<br>C2                | UPI000065EC34 related cluster; n=1; Takifugu<br>rubripes Rep: UPI000065EC34 UniRef100 entry -<br>Takifugu rubripes                                                                                                     |
| 43007 | 7.56 | 0.20 | 0.0000 | 0.0013 | 4.28 | sb_gmapov_0<br>013f18.pDNR<br>F2   | Ifi-6-16 multi-domain protein                                                                                                                                                                                          |
| 44909 | 2.95 | 0.74 | 0.0007 | 0.0125 | 4.27 | all_v2.0.3619<br>.C1               | unclassified                                                                                                                                                                                                           |
| 51332 | 6.51 | 0.24 | 0.0000 | 0.0013 | 4.25 | all_v2.0.4629<br>.C1               | unclassified                                                                                                                                                                                                           |
| 49317 | 4.01 | 0.44 | 0.0001 | 0.0027 | 4.13 | all_v2.0.1380<br>5.C1              | unclassified                                                                                                                                                                                                           |
| 51171 | 5.27 | 0.33 | 0.0000 | 0.0015 | 4.08 | all_v2.0.1247<br>5.C1              | unclassified                                                                                                                                                                                                           |
| 44464 | 5.07 | 0.30 | 0.0000 | 0.0016 | 4.07 | CK10add                            | custom - CC chemokine                                                                                                                                                                                                  |
| 38791 | 3.49 | 0.52 | 0.0002 | 0.0053 | 4.01 | all_v2.0.8167<br>.C1               | LIM and senescent cell antigen-like-containing<br>domain protein 1; n=22; Euteleostomi Rep: LIM<br>and senescent cell antigen-like-containing domain                                                                   |

|       |      |      |        |        |      |                                          |                                                                                                                                                                                                                                                                            |
|-------|------|------|--------|--------|------|------------------------------------------|----------------------------------------------------------------------------------------------------------------------------------------------------------------------------------------------------------------------------------------------------------------------------|
| 38791 | 3.49 | 0.52 | 0.0002 | 0.0053 | 4.01 | all_v2.0.8167<br>.C1                     | LIM and senescent cell antigen-like-containing domain protein 1; n=22; Euteleostomi Rep: LIM and senescent cell antigen-like-containing domain protein 1 - Homo sapiens (Human)                                                                                            |
| 36426 | 9.88 | 0.13 | 0.0000 | 0.0013 | 4.00 | all_v2.0.8306<br>.C2                     | Cell division cycle 42 - Danio rerio (Zebrafish) (Brachydanio rerio)                                                                                                                                                                                                       |
| 39490 | 7.41 | 0.18 | 0.0000 | 0.0013 | 3.86 | all_v2.0.5879<br>.C2                     | Novel protein similar to vertebrate nebulin; n=3; Danio rerio Rep: Novel protein similar to vertebrate nebulin - Danio rerio (Zebrafish) (Brachydanio rerio)                                                                                                               |
| 41313 | 4.58 | 0.40 | 0.0000 | 0.0018 | 3.85 | all_v2.0.1009<br>.C1                     | Probable ATP-dependent helicase LGP2 (EC 3.6.1.-) (Protein D11Lgp2 homolog).; n=1; Takifugu rubripes Rep: Probable ATP-dependent helicase LGP2 (EC 3.6.1.-) (Protein D11Lgp2 homolog). - Takifugu rubripes                                                                 |
| 47050 | 4.70 | 0.33 | 0.0000 | 0.0018 | 3.78 | sb_gmapte_0<br>012e14.pDN<br>RF2         | Unassigned protein                                                                                                                                                                                                                                                         |
| 45583 | 3.28 | 0.48 | 0.0003 | 0.0072 | 3.77 | all_v2.0.2772<br>.C15                    | non-directed                                                                                                                                                                                                                                                               |
| 54090 | 7.28 | 0.18 | 0.0000 | 0.0013 | 3.77 | all_v2.0.2294<br>.C1                     | unclassified                                                                                                                                                                                                                                                               |
| 45325 | 6.70 | 0.21 | 0.0000 | 0.0013 | 3.76 | all_v2.0.1467<br>7.C1                    | LOC764254; similar to transposase                                                                                                                                                                                                                                          |
| 47445 | 6.27 | 0.23 | 0.0000 | 0.0013 | 3.75 | sb_gmnbmd_0004h11.t7                     | Unassigned protein                                                                                                                                                                                                                                                         |
| 38095 | 3.46 | 0.41 | 0.0002 | 0.0055 | 3.67 | all_v2.0.6540<br>.C1                     | Homolog of Homo sapiens Hemicentin; n=1; Takifugu rubripes Rep: Homolog of Homo sapiens Hemicentin - Takifugu rubripes custom - probable ATP-dependent RNA helicase DHX                                                                                                    |
| 44591 | 8.96 | 0.13 | 0.0000 | 0.0013 | 3.67 | DXH4b<br>sb_gmnbblits_0022m22.pD<br>NRF2 | Transposase; n=27; Anopheles gambiae Rep: Transposase - Anopheles gambiae (African malaria mosquito)                                                                                                                                                                       |
| 42784 | 3.39 | 0.54 | 0.0002 | 0.0061 | 3.66 | sb_gmlbgits_0004k02.sp6                  | PREDICTED: similar to SPAC167.01; n=1; Danio rerio Rep: PREDICTED: similar to SPAC167.01 - Danio rerio                                                                                                                                                                     |
| 41027 | 3.17 | 0.68 | 0.0004 | 0.0087 | 3.66 | all_v2.0.1400<br>3.C2                    | Unassigned protein                                                                                                                                                                                                                                                         |
| 47847 | 3.26 | 0.42 | 0.0003 | 0.0075 | 3.65 | all_v2.0.1116<br>6.C1                    | unclassified                                                                                                                                                                                                                                                               |
| 51629 | 2.97 | 0.66 | 0.0007 | 0.0122 | 3.59 | sb_gmnbhkkic_0005c17.pD<br>NRF2          | LOC539080; similar to immunity-related GTPase family, cinema 1                                                                                                                                                                                                             |
| 45139 | 2.80 | 0.69 | 0.0011 | 0.0164 | 3.56 | sb_gmnbhkcas_0018b23.pD<br>NRm13r        | CC chemokine type 3; n=1; Gadus morhua Rep: CC chemokine type 3 - Gadus morhua (Atlantic cod)                                                                                                                                                                              |
| 36384 | 5.29 | 0.25 | 0.0000 | 0.0015 | 3.55 |                                          | Single-stranded DNA-binding protein, mitochondrial precursor (Mt-SSB) (MtSSB) (PWP1-interacting protein 17).; n=1; Takifugu rubripes Rep: Single-stranded DNA-binding protein, mitochondrial precursor (Mt-SSB) (MtSSB) (PWP1-interacting protein 17). - Takifugu rubripes |
| 42223 | 3.88 | 0.42 | 0.0001 | 0.0032 | 3.55 | all_v2.0.3958<br>.C1                     | Claudin 30; n=1; Oreochromis mossambicus Rep: Claudin 30 - Oreochromis mossambicus (Mozambique tilapia) (Tilapia mossambica)                                                                                                                                               |
| 36525 | 3.10 | 0.44 | 0.0005 | 0.0098 | 3.49 | all_v2.0.1662<br>0.C1                    | Bloodthirsty; n=2; Notothenioidei Rep: Bloodthirsty - Chaenocephalus aceratus (White crocodile fish)                                                                                                                                                                       |
| 36186 | 6.92 | 0.18 | 0.0000 | 0.0013 | 3.48 | all_v2.0.661.<br>C2                      | Homolog of Brachydanio rerio Transmembrane 9 superfamily member 2.; n=1; Takifugu rubripes Rep: Homolog of Brachydanio rerio Transmembrane 9 superfamily member 2 - Takifugu rubripes                                                                                      |
| 37831 | 5.04 | 0.28 | 0.0000 | 0.0016 | 3.45 | sb_gmnlfsas_0002e11.t7                   |                                                                                                                                                                                                                                                                            |
| 44371 | 2.70 | 0.65 | 0.0014 | 0.0191 | 3.43 | all_v2.0.2805<br>.C1                     | caspase c<br>Homolog of Homo sapiens Deoxyribonuclease                                                                                                                                                                                                                     |



|       |      |      |        |        |      |                                    |                                                                                                                                                                                                                                                                                                                                                                                             |
|-------|------|------|--------|--------|------|------------------------------------|---------------------------------------------------------------------------------------------------------------------------------------------------------------------------------------------------------------------------------------------------------------------------------------------------------------------------------------------------------------------------------------------|
| 39112 | 3.37 | 0.51 | 0.0002 | 0.0062 | 3.40 | all_v2.0.1343<br>.C1               | Mitochondrial import inner membrane translocase subunit Tim23; n=3; Otophysi Rep: Mitochondrial import inner membrane translocase subunit Tim23 - Danio rerio (Zebrafish) (Brachydanio rerio)                                                                                                                                                                                               |
| 51371 | 5.03 | 0.26 | 0.0000 | 0.0016 | 3.39 | all_v2.0.5978<br>.C1               | unclassified                                                                                                                                                                                                                                                                                                                                                                                |
| 36190 | 4.67 | 0.32 | 0.0000 | 0.0018 | 3.38 | sb_gmapht_0<br>014i15.pDNR<br>F2   | Bloodthirsty; n=2; Notothenioidei Rep: Bloodthirsty - Chaenocephalus aceratus (White crocodile fish)                                                                                                                                                                                                                                                                                        |
| 52069 | 4.25 | 0.33 | 0.0000 | 0.0023 | 3.36 | all_v2.0.6954<br>.C2               | unclassified                                                                                                                                                                                                                                                                                                                                                                                |
| 54933 | 4.33 | 0.34 | 0.0000 | 0.0021 | 3.35 | all_v2.0.5297<br>.C2               | unclassified                                                                                                                                                                                                                                                                                                                                                                                |
| 41902 | 3.31 | 0.60 | 0.0003 | 0.0070 | 3.32 | all_v2.0.1081<br>.C6               | Ribosomal protein L9e; n=4; Endopterygota Rep: Ribosomal protein L9e - Meladema coriacea ilvB (bacterial acetolactate synthase)-like; n=1; Takifugu rubripes Rep: ilvB (bacterial acetolactate synthase)-like - Takifugu rubripes                                                                                                                                                           |
| 38552 | 6.74 | 0.17 | 0.0000 | 0.0013 | 3.23 | all_v2.0.1004<br>6.C1              | PREDICTED: similar to transposase; n=2; Strongylocentrotus purpuratus Rep: PREDICTED: similar to transposase - Strongylocentrotus purpuratus                                                                                                                                                                                                                                                |
| 41153 | 3.12 | 0.41 | 0.0004 | 0.0096 | 3.21 | all_v2.0.7408<br>.C1               | Bloodthirsty; n=2; Notothenioidei Rep: Bloodthirsty - Chaenocephalus aceratus (White crocodile fish)                                                                                                                                                                                                                                                                                        |
| 36195 | 5.46 | 0.23 | 0.0000 | 0.0015 | 3.16 | sb_gmnlbfc_0007a23.t7              | Unassigned protein                                                                                                                                                                                                                                                                                                                                                                          |
| 48085 | 3.46 | 0.51 | 0.0002 | 0.0055 | 3.14 | sb_gmnl1a_0019f11.t7               | Ubiquitin-conjugating enzyme E2 D2 (EC 6.3.2.19) (Ubiquitin-protein ligase D2) (Ubiquitin carrier protein D2) (Ubiquitin-conjugating enzyme E2-17 kDa 2) (E2(17)KB 2); n=32; Euteleostomi Rep: Ubiquitin-conjugating enzyme E2 D2 (EC 6.3.2.19) (Ubiquitin-protein ligase D2) (Ubiquitin carrier protein D2) (Ubiquitin-conjugating enzyme E2-17 kDa 2) (E2(17)KB 2) - Homo sapiens (Human) |
| 42925 | 2.78 | 0.49 | 0.0011 | 0.0169 | 3.12 | all_v2.0.9463<br>.C1               | custom - viperin                                                                                                                                                                                                                                                                                                                                                                            |
| 44624 | 3.33 | 0.45 | 0.0003 | 0.0067 | 3.12 | Codviperin1                        | Unassigned protein                                                                                                                                                                                                                                                                                                                                                                          |
| 48451 | 5.15 | 0.24 | 0.0000 | 0.0016 | 3.10 | sb_gmnl5fc_0001c01.t7              | Interferon-inducible GTPase 5 (EC 3.6.5.-) (Immunity-related GTPase cinema 1).; n=3; Takifugu rubripes Rep: Interferon-inducible GTPase 5 (EC 3.6.5.-) (Immunity-related GTPase cinema 1). - Takifugu rubripes                                                                                                                                                                              |
| 38618 | 3.08 | 0.42 | 0.0005 | 0.0101 | 3.10 | all_v2.0.3462<br>.C1               | non-directed                                                                                                                                                                                                                                                                                                                                                                                |
| 45684 | 2.61 | 0.55 | 0.0018 | 0.0222 | 3.09 | all_v2.0.6038<br>.C1.a             | non-directed                                                                                                                                                                                                                                                                                                                                                                                |
| 44336 | 5.29 | 0.24 | 0.0000 | 0.0015 | 3.08 | sb_gmapht_0<br>037b08.pDNR<br>RF2  | bloodthirsty [Notothenia coriiceps]                                                                                                                                                                                                                                                                                                                                                         |
| 49575 | 4.41 | 0.27 | 0.0000 | 0.0020 | 3.07 | all_v2.0.3263<br>.C1               | unclassified                                                                                                                                                                                                                                                                                                                                                                                |
| 47485 | 4.09 | 0.33 | 0.0001 | 0.0025 | 3.06 | all_v2.0.1027<br>6.C1              | Unassigned protein                                                                                                                                                                                                                                                                                                                                                                          |
| 51818 | 4.65 | 0.25 | 0.0000 | 0.0018 | 3.02 | all_v2.0.1145<br>5.C1              | unclassified                                                                                                                                                                                                                                                                                                                                                                                |
| 45917 | 6.01 | 0.19 | 0.0000 | 0.0014 | 3.01 | all_v2.0.132.<br>C2.a              | non-directed                                                                                                                                                                                                                                                                                                                                                                                |
| 49008 | 3.29 | 0.37 | 0.0003 | 0.0072 | 3.00 | sb_gmnl1a_0002h23.t7               | Unassigned protein                                                                                                                                                                                                                                                                                                                                                                          |
| 37904 | 3.03 | 0.57 | 0.0006 | 0.0109 | 2.98 | sb_gmnbbrts_0003k13.pDNR<br>RF2    | Homolog of Gallus gallus Double-stranded RNA-activated protein kinase.; n=1; Takifugu rubripes Rep: Homolog of Gallus gallus Double-stranded RNA-activated protein kinase. - Takifugu rubripes                                                                                                                                                                                              |
| 41730 | 4.74 | 0.25 | 0.0000 | 0.0018 | 2.98 | sb_gmapov_0<br>017j04.pDNR<br>m13r | Regulatory-associated protein of mTOR (Raptor) (P150 target of rapamycin (TOR)-scaffold protein); n=24; Tetrapoda Rep: Regulatory-associated protein of mTOR (Raptor) (P150 target of rapamycin (TOR)-scaffold protein) - Homo                                                                                                                                                              |

|       |      |      |        |        |      | sapiens (Human)                                                                                                                                                                                                                                                                                                                                                                                     |
|-------|------|------|--------|--------|------|-----------------------------------------------------------------------------------------------------------------------------------------------------------------------------------------------------------------------------------------------------------------------------------------------------------------------------------------------------------------------------------------------------|
| 50715 | 4.93 | 0.23 | 0.0000 | 0.0017 | 2.96 | all_v2.0.4215<br>.C1<br>unclassified<br>Transmembrane protein 7; n=1; Siniperca chuatsi Rep: Transmembrane protein 7 - Siniperca chuatsi (Chinese perch)<br>PREDICTED: similar to protein BAP28 (FLJ10359); n=1; Monodelphis domestica Rep: PREDICTED: similar to protein BAP28 (FLJ10359) - Monodelphis domestica                                                                                  |
| 42748 | 6.41 | 0.16 | 0.0000 | 0.0013 | 2.96 | all_v2.0.9596<br>.C1<br>unclassified<br>G protein-coupled receptor 155; n=1; Takifugu rubripes Rep: G protein-coupled receptor 155 - Fugu rubripes (Japanese pufferfish) (Takifugu rubripes)<br>Bloodthirsty; n=2; Notothenioidei Rep: Bloodthirsty - Chaenocephalus aceratus (White crocodile fish)                                                                                                |
| 40875 | 3.01 | 0.39 | 0.0006 | 0.0116 | 2.95 | sb_gmnbhkc<br>_0015m19.p<br>DNRm13r<br>all_v2.0.1340<br>4.C1<br>unclassified<br>G protein-coupled receptor 155; n=1; Takifugu rubripes Rep: G protein-coupled receptor 155 - Fugu rubripes (Japanese pufferfish) (Takifugu rubripes)<br>Bloodthirsty; n=2; Notothenioidei Rep: Bloodthirsty - Chaenocephalus aceratus (White crocodile fish)                                                        |
| 53251 | 3.76 | 0.31 | 0.0001 | 0.0038 | 2.95 | all_v2.0.661.<br>C39<br>sb_gmnbhkas<br>_0019c20.pD<br>NRF2<br>all_v2.0.661.<br>C39<br>sb_gmnbbr_0<br>013m15.pDN<br>Rm13r<br>all_v2.0.4658<br>.C1.a<br>Unassigned protein                                                                                                                                                                                                                            |
| 37289 | 5.61 | 0.20 | 0.0000 | 0.0014 | 2.94 | all_v2.0.661.<br>C39<br>sb_gmnbbr_0<br>013m15.pDN<br>Rm13r<br>all_v2.0.4658<br>.C1.a<br>non-directed<br>Bloodthirsty; n=2; Notothenioidei Rep: Bloodthirsty - Chaenocephalus aceratus (White crocodile fish)                                                                                                                                                                                        |
| 36193 | 2.52 | 0.74 | 0.0024 | 0.0258 | 2.92 | all_v2.0.661.<br>C39<br>sb_gmnbbr_0<br>013m15.pDN<br>Rm13r<br>all_v2.0.4658<br>.C1.a<br>non-directed<br>Bloodthirsty; n=2; Notothenioidei Rep: Bloodthirsty - Chaenocephalus aceratus (White crocodile fish)                                                                                                                                                                                        |
| 47613 | 4.66 | 0.27 | 0.0000 | 0.0018 | 2.92 | all_v2.0.661.<br>C20<br>sb_gmnbpcic<br>_0012f05.pD<br>NRm13r<br>all_v2.0.5847<br>.C1<br>all_v2.0.1736<br>.C2<br>unclassified<br>Prostaglandin E synthase 3; n=5; Danio rerio Rep: Prostaglandin E synthase 3 - Danio rerio (Zebrafish) (Brachydanio rerio)<br>Zgc:64031; n=3; Danio rerio Rep: Zgc:64031 - Danio rerio (Zebrafish) (Brachydanio rerio)<br>custom - Interferon regulatory factor 10K |
| 45753 | 3.55 | 0.33 | 0.0002 | 0.0049 | 2.91 | all_v2.0.661.<br>C20<br>sb_gmnbpcic<br>_0012f05.pD<br>NRm13r<br>all_v2.0.5847<br>.C1<br>all_v2.0.1736<br>.C2<br>unclassified<br>Prostaglandin E synthase 3; n=5; Danio rerio Rep: Prostaglandin E synthase 3 - Danio rerio (Zebrafish) (Brachydanio rerio)<br>Zgc:64031; n=3; Danio rerio Rep: Zgc:64031 - Danio rerio (Zebrafish) (Brachydanio rerio)<br>custom - Interferon regulatory factor 10K |
| 36185 | 6.08 | 0.17 | 0.0000 | 0.0013 | 2.91 | all_v2.0.661.<br>C20<br>sb_gmnbpcic<br>_0012f05.pD<br>NRm13r<br>all_v2.0.5847<br>.C1<br>all_v2.0.1736<br>.C2<br>unclassified<br>Prostaglandin E synthase 3; n=5; Danio rerio Rep: Prostaglandin E synthase 3 - Danio rerio (Zebrafish) (Brachydanio rerio)<br>Zgc:64031; n=3; Danio rerio Rep: Zgc:64031 - Danio rerio (Zebrafish) (Brachydanio rerio)<br>custom - Interferon regulatory factor 10K |
| 40809 | 5.71 | 0.18 | 0.0000 | 0.0014 | 2.91 | all_v2.0.661.<br>C20<br>sb_gmnbpcic<br>_0012f05.pD<br>NRm13r<br>all_v2.0.5847<br>.C1<br>all_v2.0.1736<br>.C2<br>unclassified<br>Prostaglandin E synthase 3; n=5; Danio rerio Rep: Prostaglandin E synthase 3 - Danio rerio (Zebrafish) (Brachydanio rerio)<br>Zgc:64031; n=3; Danio rerio Rep: Zgc:64031 - Danio rerio (Zebrafish) (Brachydanio rerio)<br>custom - Interferon regulatory factor 10K |
| 37392 | 2.99 | 0.53 | 0.0006 | 0.0119 | 2.90 | all_v2.0.661.<br>C20<br>sb_gmnbpcic<br>_0012f05.pD<br>NRm13r<br>all_v2.0.5847<br>.C1<br>all_v2.0.1736<br>.C2<br>unclassified<br>Prostaglandin E synthase 3; n=5; Danio rerio Rep: Prostaglandin E synthase 3 - Danio rerio (Zebrafish) (Brachydanio rerio)<br>Zgc:64031; n=3; Danio rerio Rep: Zgc:64031 - Danio rerio (Zebrafish) (Brachydanio rerio)<br>custom - Interferon regulatory factor 10K |
| 55096 | 3.04 | 0.41 | 0.0005 | 0.0108 | 2.87 | all_v2.0.661.<br>C20<br>sb_gmnbpcic<br>_0012f05.pD<br>NRm13r<br>all_v2.0.5847<br>.C1<br>all_v2.0.1736<br>.C2<br>unclassified<br>Prostaglandin E synthase 3; n=5; Danio rerio Rep: Prostaglandin E synthase 3 - Danio rerio (Zebrafish) (Brachydanio rerio)<br>Zgc:64031; n=3; Danio rerio Rep: Zgc:64031 - Danio rerio (Zebrafish) (Brachydanio rerio)<br>custom - Interferon regulatory factor 10K |
| 41397 | 4.18 | 0.27 | 0.0001 | 0.0024 | 2.86 | all_v2.0.661.<br>C20<br>sb_gmnbpcic<br>_0012f05.pD<br>NRm13r<br>all_v2.0.5847<br>.C1<br>all_v2.0.1736<br>.C2<br>unclassified<br>Prostaglandin E synthase 3; n=5; Danio rerio Rep: Prostaglandin E synthase 3 - Danio rerio (Zebrafish) (Brachydanio rerio)<br>Zgc:64031; n=3; Danio rerio Rep: Zgc:64031 - Danio rerio (Zebrafish) (Brachydanio rerio)<br>custom - Interferon regulatory factor 10K |
| 43888 | 5.46 | 0.19 | 0.0000 | 0.0015 | 2.86 | all_v2.0.661.<br>C20<br>sb_gmnbpcic<br>_0012f05.pD<br>NRm13r<br>all_v2.0.5847<br>.C1<br>all_v2.0.1736<br>.C2<br>unclassified<br>Prostaglandin E synthase 3; n=5; Danio rerio Rep: Prostaglandin E synthase 3 - Danio rerio (Zebrafish) (Brachydanio rerio)<br>Zgc:64031; n=3; Danio rerio Rep: Zgc:64031 - Danio rerio (Zebrafish) (Brachydanio rerio)<br>custom - Interferon regulatory factor 10K |
| 44544 | 5.40 | 0.20 | 0.0000 | 0.0015 | 2.85 | all_v2.0.661.<br>C20<br>sb_gmnbpcic<br>_0012f05.pD<br>NRm13r<br>all_v2.0.5847<br>.C1<br>all_v2.0.1736<br>.C2<br>unclassified<br>Prostaglandin E synthase 3; n=5; Danio rerio Rep: Prostaglandin E synthase 3 - Danio rerio (Zebrafish) (Brachydanio rerio)<br>Zgc:64031; n=3; Danio rerio Rep: Zgc:64031 - Danio rerio (Zebrafish) (Brachydanio rerio)<br>custom - Interferon regulatory factor 10K |
| 45747 | 2.62 | 0.41 | 0.0018 | 0.0216 | 2.84 | all_v2.0.661.<br>C20<br>sb_gmnbpcic<br>_0012f05.pD<br>NRm13r<br>all_v2.0.5847<br>.C1<br>all_v2.0.1736<br>.C2<br>unclassified<br>Prostaglandin E synthase 3; n=5; Danio rerio Rep: Prostaglandin E synthase 3 - Danio rerio (Zebrafish) (Brachydanio rerio)<br>Zgc:64031; n=3; Danio rerio Rep: Zgc:64031 - Danio rerio (Zebrafish) (Brachydanio rerio)<br>custom - Interferon regulatory factor 10K |
| 38352 | 4.48 | 0.24 | 0.0000 | 0.0019 | 2.84 | all_v2.0.661.<br>C20<br>sb_gmnbpcic<br>_0012f05.pD<br>NRm13r<br>all_v2.0.5847<br>.C1<br>all_v2.0.1736<br>.C2<br>unclassified<br>Prostaglandin E synthase 3; n=5; Danio rerio Rep: Prostaglandin E synthase 3 - Danio rerio (Zebrafish) (Brachydanio rerio)<br>Zgc:64031; n=3; Danio rerio Rep: Zgc:64031 - Danio rerio (Zebrafish) (Brachydanio rerio)<br>custom - Interferon regulatory factor 10K |
| 48129 | 3.66 | 0.31 | 0.0001 | 0.0042 | 2.83 | all_v2.0.661.<br>C20<br>sb_gmnbpcic<br>_0012f05.pD<br>NRm13r<br>all_v2.0.5847<br>.C1<br>all_v2.0.1736<br>.C2<br>unclassified<br>Prostaglandin E synthase 3; n=5; Danio rerio Rep: Prostaglandin E synthase 3 - Danio rerio (Zebrafish) (Brachydanio rerio)<br>Zgc:64031; n=3; Danio rerio Rep: Zgc:64031 - Danio rerio (Zebrafish) (Brachydanio rerio)<br>custom - Interferon regulatory factor 10K |
| 40489 | 3.40 | 0.39 | 0.0002 | 0.0060 | 2.80 | all_v2.0.661.<br>C20<br>sb_gmnbpcic<br>_0012f05.pD<br>NRm13r<br>all_v2.0.5847<br>.C1<br>all_v2.0.1736<br>.C2<br>unclassified<br>Prostaglandin E synthase 3; n=5; Danio rerio Rep: Prostaglandin E synthase 3 - Danio rerio (Zebrafish) (Brachydanio rerio)<br>Zgc:64031; n=3; Danio rerio Rep: Zgc:64031 - Danio rerio (Zebrafish) (Brachydanio rerio)<br>custom - Interferon regulatory factor 10K |
| 41014 | 6.71 | 0.14 | 0.0000 | 0.0013 | 2.78 | all_v2.0.661.<br>C20<br>sb_gmnbpcic<br>_0012f05.pD<br>NRm13r<br>all_v2.0.5847<br>.C1<br>all_v2.0.1736<br>.C2<br>unclassified<br>Prostaglandin E synthase 3; n=5; Danio rerio Rep: Prostaglandin E synthase 3 - Danio rerio (Zebrafish) (Brachydanio rerio)<br>Zgc:64031; n=3; Danio rerio Rep: Zgc:64031 - Danio rerio (Zebrafish) (Brachydanio rerio)<br>custom - Interferon regulatory factor 10K |
| 43192 | 6.07 | 0.16 | 0.0000 | 0.0013 | 2.78 | all_v2.0.661.<br>C20<br>sb_gmnbpcic<br>_0012f05.pD<br>NRm13r<br>all_v2.0.5847<br>.C1<br>all_v2.0.1736<br>.C2<br>unclassified<br>Prostaglandin E synthase 3; n=5; Danio rerio Rep: Prostaglandin E synthase 3 - Danio rerio (Zebrafish) (Brachydanio rerio)<br>Zgc:64031; n=3; Danio rerio Rep: Zgc:64031 - Danio rerio (Zebrafish) (Brachydanio rerio)<br>custom - Interferon regulatory factor 10K |
| 44579 | 4.15 | 0.31 | 0.0001 | 0.0025 | 2.76 | all_v2.0.661.<br>C20<br>sb_gmnbpcic<br>_0012f05.pD<br>NRm13r<br>all_v2.0.5847<br>.C1<br>all_v2.0.1736<br>.C2<br>unclassified<br>Prostaglandin E synthase 3; n=5; Danio rerio Rep: Prostaglandin E synthase 3 - Danio rerio (Zebrafish) (Brachydanio rerio)<br>Zgc:64031; n=3; Danio rerio Rep: Zgc:64031 - Danio rerio (Zebrafish) (Brachydanio rerio)<br>custom - Interferon regulatory factor 10K |
| 49851 | 3.20 | 0.44 | 0.0004 | 0.0084 | 2.75 | all_v2.0.661.<br>C20<br>sb_gmnbpcic<br>_0012f05.pD<br>NRm13r<br>all_v2.0.5847<br>.C1<br>all_v2.0.1736<br>.C2<br>unclassified<br>Prostaglandin E synthase 3; n=5; Danio rerio Rep: Prostaglandin E synthase 3 - Danio rerio (Zebrafish) (Brachydanio rerio)<br>Zgc:64031; n=3; Danio rerio Rep: Zgc:64031 - Danio rerio (Zebrafish) (Brachydanio rerio)<br>custom - Interferon regulatory factor 10K |
| 41829 | 5.40 | 0.19 | 0.0000 | 0.0015 | 2.74 | all_v2.0.661.<br>C20<br>sb_gmnbpcic<br>_0012f05.pD<br>NRm13r<br>all_v2.0.5847<br>.C1<br>all_v2.0.1736<br>.C2<br>unclassified<br>Prostaglandin E synthase 3; n=5; Danio rerio Rep: Prostaglandin E synthase 3 - Danio rerio (Zebrafish) (Brachydanio rerio)<br>Zgc:64031; n=3; Danio rerio Rep: Zgc:64031 - Danio rerio (Zebrafish) (Brachydanio rerio)<br>custom - Interferon regulatory factor 10K |
| 38589 | 3.12 | 0.39 | 0.0004 | 0.0095 | 2.74 | all_v2.0.661.<br>C20<br>sb_gmnbpcic<br>_0012f05.pD<br>NRm13r<br>all_v2.0.5847<br>.C1<br>all_v2.0.1736<br>.C2<br>unclassified<br>Prostaglandin E synthase 3; n=5; Danio rerio Rep: Prostaglandin E synthase 3 - Danio rerio (Zebrafish) (Brachydanio rerio)<br>Zgc:64031; n=3; Danio rerio Rep: Zgc:64031 - Danio rerio (Zebrafish) (Brachydanio rerio)<br>custom - Interferon regulatory factor 10K |

|       |      |      |        |        |      |                                                                                                                   |                                                                                                                                                                                                                                                                                                                                                                                                                                        |
|-------|------|------|--------|--------|------|-------------------------------------------------------------------------------------------------------------------|----------------------------------------------------------------------------------------------------------------------------------------------------------------------------------------------------------------------------------------------------------------------------------------------------------------------------------------------------------------------------------------------------------------------------------------|
| 38589 | 3.12 | 0.39 | 0.0004 | 0.0095 | 2.74 | sb_gmnbpcic_0005b07.pD<br>NRF2                                                                                    | Integrin alpha-2 precursor (Platelet membrane glycoprotein Ia) (GPIa) (Collagen receptor) (VLA-2 alpha chain) (CD49b antigen).; n=1; Takifugu rubripes Rep: Integrin alpha-2 precursor (Platelet membrane glycoprotein Ia) (GPIa) (Collagen receptor) (VLA-2 alpha chain) (CD49b antigen). - Takifugu rubripes                                                                                                                         |
| 41103 | 5.29 | 0.20 | 0.0000 | 0.0015 | 2.73 | sb_gmnbhkc_0006n17.pD<br>NRF2<br>1AY614590_<br>Gadus<br>morhua CC<br>chemokine<br>type 1<br>mRNA,<br>complete cds | PREDICTED: similar to transposase, partial; n=1; Strongylocentrotus purpuratus Rep: PREDICTED: similar to transposase, partial - Strongylocentrotus purpuratus                                                                                                                                                                                                                                                                         |
| 44454 | 2.85 | 0.47 | 0.0009 | 0.0149 | 2.72 | all_v2.0.5496<br>.C1                                                                                              | custom - CC chemokine                                                                                                                                                                                                                                                                                                                                                                                                                  |
| 52032 | 2.57 | 0.68 | 0.0020 | 0.0237 | 2.70 | all_v2.0.3031<br>.C1                                                                                              | unclassified                                                                                                                                                                                                                                                                                                                                                                                                                           |
| 46452 | 4.83 | 0.21 | 0.0000 | 0.0017 | 2.68 | DXH2a                                                                                                             | Unassigned protein<br>custom - probable ATP-dependent RNA helicase DHX                                                                                                                                                                                                                                                                                                                                                                 |
| 44585 | 4.97 | 0.21 | 0.0000 | 0.0016 | 2.67 | all_v2.0.9595<br>.C2                                                                                              | NFX1-type zinc finger-containing protein 1.; n=1; Takifugu rubripes Rep: NFX1-type zinc finger-containing protein 1 - Takifugu rubripes                                                                                                                                                                                                                                                                                                |
| 39325 | 5.43 | 0.19 | 0.0000 | 0.0015 | 2.66 | CK2c1d                                                                                                            | custom - CC chemokine                                                                                                                                                                                                                                                                                                                                                                                                                  |
| 44470 | 2.65 | 0.50 | 0.0016 | 0.0209 | 2.66 | all_v2.0.8766<br>.C1                                                                                              | unclassified                                                                                                                                                                                                                                                                                                                                                                                                                           |
| 55231 | 3.88 | 0.28 | 0.0001 | 0.0033 | 2.66 | all_v2.0.4194<br>.C1                                                                                              | UDP-glucuronic acid/UDP-N-acetylgalactosamine transporter (UDP- GlcA/UDP-GalNAc transporter) (Solute carrier family 35 member D1) (UDP-galactose transporter-related protein 7) (UGTrel7).; n=1; Takifugu rubripes Rep: UDP-glucuronic acid/UDP-N-acetylgalactosamine transporter (UDP- GlcA/UDP-GalNAc transporter) (Solute carrier family 35 member D1) (UDP-galactose transporter-related protein 7) (UGTrel7). - Takifugu rubripes |
| 42946 | 2.51 | 0.88 | 0.0025 | 0.0261 | 2.64 | all_v2.0.5996<br>.C2                                                                                              | unclassified                                                                                                                                                                                                                                                                                                                                                                                                                           |
| 52606 | 6.03 | 0.15 | 0.0000 | 0.0013 | 2.64 | all_v2.0.8631<br>.C1                                                                                              | unclassified                                                                                                                                                                                                                                                                                                                                                                                                                           |
| 55108 | 4.03 | 0.26 | 0.0001 | 0.0027 | 2.64 | sb_gmnbspic_0012b01.pD<br>NRF2                                                                                    | PREDICTED: similar to retinoblastoma-associated protein 140; n=2; Canis lupus familiaris Rep: PREDICTED: similar to retinoblastoma-associated protein 140 - Canis familiaris                                                                                                                                                                                                                                                           |
| 40930 | 3.52 | 0.37 | 0.0002 | 0.0051 | 2.64 | all_v2.0.617.<br>C5                                                                                               | Unassigned protein                                                                                                                                                                                                                                                                                                                                                                                                                     |
| 47156 | 4.14 | 0.28 | 0.0001 | 0.0025 | 2.63 | all_v2.0.415.<br>C2                                                                                               | Homolog of Homo sapiens Spastic ataxia of Charlevoix-Saguenay; n=1; Takifugu rubripes Rep: Homolog of Homo sapiens Spastic ataxia of Charlevoix-Saguenay - Takifugu rubripes                                                                                                                                                                                                                                                           |
| 38353 | 4.10 | 0.25 | 0.0001 | 0.0025 | 2.63 | all_v2.0.8508<br>.C1                                                                                              | unclassified                                                                                                                                                                                                                                                                                                                                                                                                                           |
| 51062 | 6.72 | 0.13 | 0.0000 | 0.0013 | 2.63 | all_v2.0.1614<br>5.C1                                                                                             | Interferon regulatory factor 10; n=7; Danio rerio Rep: Interferon regulatory factor 10 - Danio rerio (Zebrafish) (Brachydanio rerio)                                                                                                                                                                                                                                                                                                   |
| 38599 | 4.79 | 0.20 | 0.0000 | 0.0017 | 2.63 | sb_gmapov_017j24.pDNR<br>F2                                                                                       | Rfc5 protein; n=5; Clupeocephala Rep: Rfc5 protein - Brachydanio rerio (Zebrafish) (Danio rerio)                                                                                                                                                                                                                                                                                                                                       |
| 41827 | 6.16 | 0.15 | 0.0000 | 0.0013 | 2.62 | sb_gmnlkfas_0003n17.t7                                                                                            | Unassigned protein                                                                                                                                                                                                                                                                                                                                                                                                                     |
| 48344 | 3.06 | 0.34 | 0.0005 | 0.0105 | 2.59 | all_v2.0.4192<br>.C1                                                                                              | unclassified                                                                                                                                                                                                                                                                                                                                                                                                                           |
| 53056 | 3.25 | 0.34 | 0.0003 | 0.0077 | 2.58 | all_v2.0.1410<br>.C1                                                                                              | unclassified                                                                                                                                                                                                                                                                                                                                                                                                                           |
| 51636 | 4.64 | 0.23 | 0.0000 | 0.0018 | 2.58 |                                                                                                                   | phosphatidylinositol-specific phospholipase C, X                                                                                                                                                                                                                                                                                                                                                                                       |

|       |      |      |        |        |      |                                                                                                              |                                                                                                                                                                                                                                          |
|-------|------|------|--------|--------|------|--------------------------------------------------------------------------------------------------------------|------------------------------------------------------------------------------------------------------------------------------------------------------------------------------------------------------------------------------------------|
| 40846 | 2.96 | 0.43 | 0.0007 | 0.0123 | 2.57 | all_v2.0.4119<br>.C1                                                                                         | PREDICTED: similar to Poly [ADP-ribose] polymerase 14 (PARP-14) (B aggressive lymphoma protein 2); n=1; Danio rerio Rep: PREDICTED: similar to Poly [ADP-ribose] polymerase 14 (PARP-14) (B aggressive lymphoma protein 2) - Danio rerio |
| 46920 | 3.44 | 0.36 | 0.0002 | 0.0057 | 2.57 | sb_gmnl1a_00<br>48f01.t7<br>1AY614591_<br>Gadus<br>morhua CC<br>chemokine<br>type 2<br>mRNA,<br>complete cds | Unassigned protein                                                                                                                                                                                                                       |
| 44465 | 2.41 | 0.54 | 0.0033 | 0.0314 | 2.55 | all_v2.0.7414<br>.C2                                                                                         | custom - CC chemokine<br>TNIP3, LOC483847; TNFAIP3 interacting protein 3                                                                                                                                                                 |
| 46358 | 3.73 | 0.26 | 0.0001 | 0.0038 | 2.51 | sb_gmapte_0<br>010k12.pDN<br>Rm13r                                                                           | PREDICTED: similar to ankyrin 2, neuronal,; n=1; Danio rerio Rep: PREDICTED: similar to ankyrin 2, neuronal, - Danio rerio                                                                                                               |
| 40216 | 4.12 | 0.25 | 0.0001 | 0.0025 | 2.51 | CK2c5                                                                                                        | custom - CC chemokine                                                                                                                                                                                                                    |
| 44456 | 2.73 | 0.44 | 0.0013 | 0.0182 | 2.50 | all_v2.0.1909<br>.C3                                                                                         | IRF7; n=1; Siniperca chuatsi Rep: IRF7 - Siniperca chuatsi (Chinese perch)                                                                                                                                                               |
| 38655 | 4.21 | 0.23 | 0.0000 | 0.0023 | 2.49 | all_v2.0.4419<br>.C1                                                                                         | unclassified                                                                                                                                                                                                                             |
| 51817 | 2.69 | 0.39 | 0.0015 | 0.0197 | 2.47 | IRF10K3                                                                                                      | custom - Interferon regulatory factor 10K                                                                                                                                                                                                |
| 44545 | 4.30 | 0.21 | 0.0000 | 0.0021 | 2.46 | all_v2.0.1469<br>6.C1                                                                                        | Unassigned protein                                                                                                                                                                                                                       |
| 48091 | 2.45 | 0.58 | 0.0029 | 0.0288 | 2.46 | all_v2.0.1490<br>0.C1                                                                                        | unclassified                                                                                                                                                                                                                             |
| 55397 | 4.71 | 0.20 | 0.0000 | 0.0018 | 2.46 | sb_gmnlskic_0005p12.pDN<br>RF2                                                                               | PREDICTED: similar to putative pol protein; n=1; Danio rerio Rep: PREDICTED: similar to putative pol protein - Danio rerio                                                                                                               |
| 40905 | 2.95 | 0.32 | 0.0007 | 0.0126 | 2.45 | all_v2.0.1299<br>5.C1                                                                                        | unclassified                                                                                                                                                                                                                             |
| 51340 | 4.54 | 0.20 | 0.0000 | 0.0019 | 2.44 | sb_gmnbhkc<br>_0005c22.pD<br>NRF2                                                                            | Homolog of Homo sapiens HECT domain and RCC1-like domain protein 3; n=1; Takifugu rubripes Rep: Homolog of Homo sapiens HECT domain and RCC1-like domain protein 3 - Takifugu rubripes                                                   |
| 38094 | 3.02 | 0.40 | 0.0006 | 0.0112 | 2.44 | all_v2.0.1204<br>9.C1                                                                                        | Bloodthirsty; n=2; Notothenioidei Rep: Bloodthirsty - Chaenocephalus aceratus (White crocodile fish)                                                                                                                                     |
| 36194 | 5.59 | 0.15 | 0.0000 | 0.0014 | 2.43 | all_v2.0.1066<br>8.C2                                                                                        | unclassified                                                                                                                                                                                                                             |
| 54821 | 3.09 | 0.36 | 0.0005 | 0.0099 | 2.43 | CK2c4                                                                                                        | custom - CC chemokine                                                                                                                                                                                                                    |
| 44463 | 2.78 | 0.40 | 0.0011 | 0.0169 | 2.43 | sb_gmnlrsras_0003k23.t7<br>sb_gmnbhkas_0001d21.pD<br>NRF2                                                    | Eph-like receptor tyrosine kinase rtk5; n=4; Danio rerio Rep: Eph-like receptor tyrosine kinase rtk5 - Danio rerio (Zebrafish) (Brachydanio rerio)                                                                                       |
| 37060 | 4.52 | 0.21 | 0.0000 | 0.0019 | 2.43 | CK2c3                                                                                                        | Unassigned protein                                                                                                                                                                                                                       |
| 47039 | 2.64 | 0.48 | 0.0017 | 0.0214 | 2.42 | all_v2.0.498.<br>C1                                                                                          | custom - CC chemokine                                                                                                                                                                                                                    |
| 44446 | 2.50 | 0.49 | 0.0025 | 0.0264 | 2.42 | sb_gmnbhkas_0006d14.pD<br>NRF2                                                                               | unclassified                                                                                                                                                                                                                             |
| 44446 | 2.50 | 0.49 | 0.0025 | 0.0264 | 2.42 | all_v2.0.1178<br>5.C1                                                                                        | Pol polyprotein; n=2; Walleye epidermal hyperplasia virus 2 Rep: Pol polyprotein - Walleye epidermal hyperplasia virus 2                                                                                                                 |
| 53530 | 2.47 | 0.63 | 0.0028 | 0.0282 | 2.42 | all_v2.0.1178<br>5.C1                                                                                        | LOC575702; similar to reverse transcriptase-like protein                                                                                                                                                                                 |
| 40019 | 3.69 | 0.28 | 0.0001 | 0.0040 | 2.42 | DXH3a                                                                                                        | custom - probable ATP-dependent RNA helicase DHX                                                                                                                                                                                         |
| 45204 | 2.63 | 0.45 | 0.0018 | 0.0216 | 2.40 | all_v2.0.1528<br>0.C1                                                                                        | Carnitine palmitoyltransferase II; n=2; Danio rerio Rep: Carnitine palmitoyltransferase II - Danio rerio (Zebrafish) (Brachydanio rerio)                                                                                                 |
| 44587 | 3.76 | 0.27 | 0.0001 | 0.0038 | 2.40 | all_v2.0.1155<br>.C2                                                                                         | Lily-type lectin; n=1; Platycephalus indicus Rep: Lily-type lectin - Platycephalus indicus (bartail flathead)                                                                                                                            |
| 44587 | 3.76 | 0.27 | 0.0001 | 0.0038 | 2.40 |                                                                                                              |                                                                                                                                                                                                                                          |
| 36317 | 4.28 | 0.21 | 0.0000 | 0.0022 | 2.39 |                                                                                                              |                                                                                                                                                                                                                                          |
| 38788 | 4.63 | 0.19 | 0.0000 | 0.0018 | 2.39 |                                                                                                              |                                                                                                                                                                                                                                          |

|       |      |      |        |        |      |                                  |                                                                                                                                                                                                                                                                                                                                                                                                                                                        |
|-------|------|------|--------|--------|------|----------------------------------|--------------------------------------------------------------------------------------------------------------------------------------------------------------------------------------------------------------------------------------------------------------------------------------------------------------------------------------------------------------------------------------------------------------------------------------------------------|
| 43362 | 2.68 | 0.49 | 0.0015 | 0.0197 | 2.39 | sb_gmnbm_u_0012115.pDN<br>RF2    | Zgc:103426; n=2; Danio rerio Rep: Zgc:103426 - Danio rerio (Zebrafish) (Brachydanio rerio)                                                                                                                                                                                                                                                                                                                                                             |
| 53587 | 5.58 | 0.14 | 0.0000 | 0.0014 | 2.38 | all_v2.0.7025<br>.C2             | unclassified                                                                                                                                                                                                                                                                                                                                                                                                                                           |
| 55314 | 2.78 | 0.46 | 0.0011 | 0.0171 | 2.37 | all_v2.0.4690<br>.C2             | unclassified                                                                                                                                                                                                                                                                                                                                                                                                                                           |
| 53739 | 3.93 | 0.24 | 0.0001 | 0.0030 | 2.37 | all_v2.0.354.<br>C2              | unclassified                                                                                                                                                                                                                                                                                                                                                                                                                                           |
| 53350 | 3.31 | 0.32 | 0.0003 | 0.0070 | 2.36 | all_v2.0.1672<br>0.C1            | unclassified                                                                                                                                                                                                                                                                                                                                                                                                                                           |
| 38670 | 4.47 | 0.20 | 0.0000 | 0.0019 | 2.36 | all_v2.0.3891<br>.C1             | Isoform 2 of Q5R156 ; n=2; Danio rerio Rep: Isoform 2 of Q5R156 - Danio rerio (Zebrafish) (Brachydanio rerio)                                                                                                                                                                                                                                                                                                                                          |
| 46707 | 3.45 | 0.31 | 0.0002 | 0.0056 | 2.36 | sb_gmnbhkic_0016o08.pD<br>NRm13r | Unassigned protein                                                                                                                                                                                                                                                                                                                                                                                                                                     |
| 44283 | 4.05 | 0.22 | 0.0001 | 0.0026 | 2.35 | sb_gmnlmfta_0004i04.t7           | ARL6IP6; ADP-ribosylation-like factor 6 interacting protein 6                                                                                                                                                                                                                                                                                                                                                                                          |
| 43481 | 3.32 | 0.27 | 0.0003 | 0.0069 | 2.33 | all_v2.0.1727<br>4.C1            | Zgc:112001; n=1; Danio rerio Rep: Zgc:112001 - Danio rerio (Zebrafish) (Brachydanio rerio)                                                                                                                                                                                                                                                                                                                                                             |
| 45046 | 4.73 | 0.17 | 0.0000 | 0.0018 | 2.32 | sb_gmapht_020j08.pDNR<br>F2      | LOC420518; similar to putative tyrosine phosphatase                                                                                                                                                                                                                                                                                                                                                                                                    |
| 39326 | 3.11 | 0.34 | 0.0004 | 0.0097 | 2.32 | all_v2.0.9595<br>.C1             | NFX1-type zinc finger-containing protein 1.; n=1; Takifugu rubripes Rep: NFX1-type zinc finger-containing protein 1 - Takifugu rubripes                                                                                                                                                                                                                                                                                                                |
| 55269 | 4.60 | 0.18 | 0.0000 | 0.0018 | 2.31 | all_v2.0.9958<br>.C1             | unclassified                                                                                                                                                                                                                                                                                                                                                                                                                                           |
| 49081 | 8.52 | 0.06 | 0.0000 | 0.0013 | 2.31 | all_v2.0.4460<br>.C1             | unclassified                                                                                                                                                                                                                                                                                                                                                                                                                                           |
| 36177 | 3.48 | 0.31 | 0.0002 | 0.0054 | 2.29 | sb_gmnlm_010g13.t7               | Birc4 protein; n=7; Danio rerio Rep: Birc4 protein - Danio rerio (Zebrafish) (Brachydanio rerio)                                                                                                                                                                                                                                                                                                                                                       |
| 36962 | 4.35 | 0.19 | 0.0000 | 0.0021 | 2.29 | all_v2.0.1265<br>1.C1            | Dysbindin; n=4; Danio rerio Rep: Dysbindin - Danio rerio (Zebrafish) (Brachydanio rerio)<br>Proprotein convertase subtilisin/kexin type 5 precursor (EC 3.4.21.-) (Proprotein convertase PC5) (Subtilisin/kexin-like protease PC5) (PC6) (hPC6).; n=1; Takifugu rubripes Rep: Proprotein convertase subtilisin/kexin type 5 precursor (EC 3.4.21.-) (Proprotein convertase PC5) (Subtilisin/kexin-like protease PC5) (PC6) (hPC6). - Takifugu rubripes |
| 41393 | 4.56 | 0.18 | 0.0000 | 0.0018 | 2.28 | sb_gmnbhkic_0014b13.pD<br>NRF2   | (Subtilisin/kexin-like protease PC5) (PC6) (hPC6). - Takifugu rubripes                                                                                                                                                                                                                                                                                                                                                                                 |
| 46223 | 4.80 | 0.17 | 0.0000 | 0.0017 | 2.27 | all_v2.0.5976<br>.C1             | SERINC3; serine incorporator 3                                                                                                                                                                                                                                                                                                                                                                                                                         |
| 37299 | 2.49 | 0.34 | 0.0026 | 0.0268 | 2.27 | all_v2.0.3679<br>.C1             | Gadd45a protein; n=2; Danio rerio Rep: Gadd45a protein - Danio rerio (Zebrafish) (Brachydanio rerio)                                                                                                                                                                                                                                                                                                                                                   |
| 48214 | 6.70 | 0.10 | 0.0000 | 0.0013 | 2.27 | sb_gmnbhkas_0014f23.pD<br>NRm13r | Unassigned protein                                                                                                                                                                                                                                                                                                                                                                                                                                     |
| 38444 | 4.15 | 0.20 | 0.0001 | 0.0025 | 2.26 | all_v2.0.1045<br>7.C1            | Homolog of Homo sapiens Zinc finger CCCH type domain containing protein 1; n=2; Takifugu rubripes Rep: Homolog of Homo sapiens Zinc finger CCCH type domain containing protein 1 - Takifugu rubripes                                                                                                                                                                                                                                                   |
| 44547 | 3.80 | 0.24 | 0.0001 | 0.0036 | 2.26 | IRF1OK5                          | custom - Interferon regulatory factor 10K Cytotoxic and regulatory T cell protein; n=1; Oncorhynchus mykiss Rep: Cytotoxic and regulatory T cell protein - Oncorhynchus mykiss (Rainbow trout) (Salmo gairdneri)                                                                                                                                                                                                                                       |
| 36797 | 2.86 | 0.39 | 0.0009 | 0.0145 | 2.26 | all_v2.0.2166<br>.C2             | SRY-box containing gene 11a; n=1; Gnathonemus petersii Rep: SRY-box containing gene 11a - Gnathonemus petersii                                                                                                                                                                                                                                                                                                                                         |
| 42375 | 4.80 | 0.17 | 0.0000 | 0.0017 | 2.25 | sb_gmnbspic_0005a23.pD<br>NRF2   | Unassigned protein                                                                                                                                                                                                                                                                                                                                                                                                                                     |
| 47376 | 2.90 | 0.35 | 0.0008 | 0.0136 | 2.25 | all_v2.0.1541<br>5.C1            | Unassigned protein                                                                                                                                                                                                                                                                                                                                                                                                                                     |
| 47560 | 3.24 | 0.32 | 0.0003 | 0.0077 | 2.25 | sb_gmapte_0001n01.pDN<br>Rm13r   | Unassigned protein                                                                                                                                                                                                                                                                                                                                                                                                                                     |

|       |      |      |        |        |      |                                |                                                                                                                                                                                                      |
|-------|------|------|--------|--------|------|--------------------------------|------------------------------------------------------------------------------------------------------------------------------------------------------------------------------------------------------|
| 38339 | 4.48 | 0.19 | 0.0000 | 0.0019 | 2.25 | sb_gmapov_019k11.pDN<br>RF2    | Homolog of Homo sapiens Sodium- and chloride-dependent GABA transporter 3; n=2; Takifugu rubripes Rep: Homolog of Homo sapiens Sodium- and chloride-dependent GABA transporter 3 - Takifugu rubripes |
| 39119 | 4.78 | 0.17 | 0.0000 | 0.0017 | 2.25 | all_v2.0.5993.C1               | Mitochondrial Rho GTPase 1-A; n=1; Danio rerio Rep: Mitochondrial Rho GTPase 1-A - Danio rerio (Zebrafish) (Brachydanio rerio)                                                                       |
| 50297 | 5.48 | 0.13 | 0.0000 | 0.0014 | 2.24 | all_v2.0.12538.C1              | unclassified                                                                                                                                                                                         |
| 39763 | 2.67 | 0.44 | 0.0015 | 0.0202 | 2.23 | all_v2.0.3451.C1               | Nucleoporin GLE1; n=1; Bos taurus Rep: Nucleoporin GLE1 - Bos taurus (Bovine)                                                                                                                        |
| 54819 | 3.81 | 0.22 | 0.0001 | 0.0036 | 2.23 | all_v2.0.14839.C1              | unclassified                                                                                                                                                                                         |
| 41096 | 3.34 | 0.26 | 0.0003 | 0.0067 | 2.23 | all_v2.0.1554.C7               | PREDICTED: similar to transposase (putative); n=1; Danio rerio Rep: PREDICTED: similar to transposase (putative) - Danio rerio                                                                       |
| 49072 | 2.83 | 0.35 | 0.0010 | 0.0153 | 2.23 | all_v2.0.16355.C1              | unclassified                                                                                                                                                                                         |
| 50117 | 2.83 | 0.34 | 0.0010 | 0.0154 | 2.22 | all_v2.0.6258.C1               | unclassified                                                                                                                                                                                         |
| 42842 | 5.52 | 0.13 | 0.0000 | 0.0014 | 2.22 | sb_gmnlmfta_0005n11.t7         | Twinfilin-2; n=2; Danio rerio Rep: Twinfilin-2 - Danio rerio (Zebrafish) (Brachydanio rerio)                                                                                                         |
| 52909 | 2.54 | 0.58 | 0.0022 | 0.0248 | 2.22 | all_v2.0.7059.C2               | unclassified                                                                                                                                                                                         |
| 48479 | 4.10 | 0.19 | 0.0001 | 0.0025 | 2.21 | all_v2.0.6321.C4               | Unassigned protein                                                                                                                                                                                   |
| 41761 | 2.81 | 0.30 | 0.0010 | 0.0162 | 2.21 | sb_gmapht_0030b14.pDN<br>Rm13r | Reverse transcriptase; n=1; Anguilla japonica Rep: Reverse transcriptase - Anguilla japonica (Japanese eel)                                                                                          |
| 44459 | 2.78 | 0.34 | 0.0011 | 0.0169 | 2.20 | CK2c5d                         | custom - CC chemokine                                                                                                                                                                                |
| 44532 | 2.86 | 0.35 | 0.0009 | 0.0145 | 2.19 | IKKAlIkeS3                     | custom - IKKA-like protein                                                                                                                                                                           |
| 36994 | 3.52 | 0.22 | 0.0002 | 0.0051 | 2.19 | sb_gmnlkfta_0002p12.t7         | EIF4G-related protein NAT1A; n=4; Danio rerio Rep: EIF4G-related protein NAT1A - Danio rerio (Zebrafish) (Brachydanio rerio)                                                                         |
| 49711 | 3.12 | 0.30 | 0.0004 | 0.0095 | 2.18 | all_v2.0.15207.C1              | unclassified                                                                                                                                                                                         |
| 44458 | 2.65 | 0.38 | 0.0016 | 0.0207 | 2.18 | CK2c1                          | custom - CC chemokine                                                                                                                                                                                |
| 45629 | 2.63 | 0.44 | 0.0017 | 0.0215 | 2.18 | all_v2.0.9479.C1               | non-directed                                                                                                                                                                                         |
| 50482 | 2.78 | 0.40 | 0.0011 | 0.0169 | 2.17 | all_v2.0.9590.C1               | unclassified                                                                                                                                                                                         |
| 51382 | 2.72 | 0.32 | 0.0013 | 0.0187 | 2.17 | all_v2.0.5897.C3               | unclassified                                                                                                                                                                                         |
| 40670 | 3.04 | 0.32 | 0.0005 | 0.0108 | 2.17 | all_v2.0.14446.C1              | PREDICTED: similar to mitochondrial carrier triple repeat 6; n=1; Monodelphis domestica Rep: PREDICTED: similar to mitochondrial carrier triple repeat 6 - Monodelphis domestica                     |
| 40263 | 4.46 | 0.18 | 0.0000 | 0.0020 | 2.16 | all_v2.0.661.C24               | PREDICTED: similar to bloodthirsty; n=3; Danio rerio Rep: PREDICTED: similar to bloodthirsty - Danio rerio                                                                                           |
| 44396 | 5.04 | 0.14 | 0.0000 | 0.0016 | 2.15 | all_v2.0.6100.C1               | CHCHD5; coiled-coil-helix-coiled-coil-helix domain containing 5                                                                                                                                      |
| 44530 | 3.01 | 0.26 | 0.0006 | 0.0115 | 2.15 | IKKAlIkeS1                     | custom - IKKA-like protein                                                                                                                                                                           |
| 43195 | 4.36 | 0.17 | 0.0000 | 0.0021 | 2.14 | all_v2.0.3448.C1               | VHSV-induced protein; n=1; Oncorhynchus mykiss Rep: VHSV-induced protein - Oncorhynchus mykiss (Rainbow trout) (Salmo gairdneri)                                                                     |
| 42591 | 3.15 | 0.24 | 0.0004 | 0.0090 | 2.14 | sb_gmapht_0021e11.pDN<br>RF2   | Titin; n=2; Danio rerio Rep: Titin - Brachydanio rerio (Zebrafish) (Danio rerio)                                                                                                                     |
| 55171 | 4.22 | 0.19 | 0.0000 | 0.0023 | 2.14 | all_v2.0.14663.C1              | unclassified                                                                                                                                                                                         |
| 46402 | 3.37 | 0.25 | 0.0002 | 0.0063 | 2.14 | sb_gmapht_0004b19.pDN<br>Rm13r | TTN; cardiac titin                                                                                                                                                                                   |
| 41595 | 2.76 | 0.37 | 0.0012 | 0.0177 | 2.13 | sb_gmapov_0028i22.pDNR         | PRP4 pre-mRNA processing factor 4 homolog; n=2; Danio rerio Rep: PRP4 pre-mRNA processing                                                                                                            |

|       |      |      |        |        |      |                               |                                                                                                                                                                                                            |
|-------|------|------|--------|--------|------|-------------------------------|------------------------------------------------------------------------------------------------------------------------------------------------------------------------------------------------------------|
| 41595 | 2.76 | 0.37 | 0.0012 | 0.0177 | 2.13 | sb_gmapov_0028122.pDNR F2     | PRP4 pre-mRNA processing factor 4 homolog; n=2; Danio rerio Rep: PRP4 pre-mRNA processing factor 4 homolog - Brachydanio rerio (Zebrafish) (Danio rerio)                                                   |
| 54239 | 3.01 | 0.27 | 0.0006 | 0.0116 | 2.12 | all_v2.0.1134 4.C1            | unclassified                                                                                                                                                                                               |
| 54855 | 2.58 | 0.45 | 0.0020 | 0.0233 | 2.12 | all_v2.0.8904 .C1             | unclassified                                                                                                                                                                                               |
| 38625 | 2.71 | 0.32 | 0.0014 | 0.0189 | 2.12 | all_v2.0.4114 .C1             | Interleukin 12 receptor beta 2.b; n=1; Danio rerio Rep: Interleukin 12 receptor beta 2.b - Danio rerio (Zebrafish) (Brachydanio rerio)                                                                     |
| 52906 | 2.78 | 0.34 | 0.0011 | 0.0169 | 2.12 | all_v2.0.2709 .C1             | unclassified                                                                                                                                                                                               |
| 39291 | 5.45 | 0.12 | 0.0000 | 0.0015 | 2.12 | sb_gmnbmu_0014b24.pDNR F2     | Nebulin.; n=1; Takifugu rubripes Rep: Nebulin. - Takifugu rubripes                                                                                                                                         |
| 40721 | 4.20 | 0.18 | 0.0000 | 0.0024 | 2.12 | sb_gmnbpcic_0001i03.pD NRF2   | PREDICTED: similar to Nitric oxide synthase trafficker; n=1; Danio rerio Rep: PREDICTED: similar to Nitric oxide synthase trafficker - Danio rerio                                                         |
| 44117 | 2.73 | 0.30 | 0.0013 | 0.0181 | 2.11 | sb_gmnbgi_002m22.pDNR F2      | Zinc finger CCCH type domain containing protein 1.; n=1; Xenopus tropicalis Rep: Zinc finger CCCH type domain containing protein 1 - Xenopus tropicalis                                                    |
| 41562 | 5.24 | 0.13 | 0.0000 | 0.0016 | 2.10 | sb_gmnlmfta_0004n10.t7        | Protein-tyrosine phosphatase-like member A; n=9; Eutheria Rep: Protein-tyrosine phosphatase-like member A - Homo sapiens (Human)                                                                           |
| 48574 | 2.96 | 0.29 | 0.0007 | 0.0123 | 2.09 | sb_gmnbhkas_0007c06.pD NRF2   | Unassigned protein                                                                                                                                                                                         |
| 52428 | 4.52 | 0.15 | 0.0000 | 0.0019 | 2.08 | all_v2.0.1417 7.C1            | unclassified                                                                                                                                                                                               |
| 40667 | 2.91 | 0.31 | 0.0008 | 0.0135 | 2.08 | all_v2.0.431. C8              | PREDICTED: similar to microtubule aggregate protein homolog; n=2; Danio rerio Rep: PREDICTED: similar to microtubule aggregate protein homolog - Danio rerio                                               |
| 41317 | 5.09 | 0.13 | 0.0000 | 0.0016 | 2.08 | all_v2.0.1165 .C4             | Probable ATP-dependent helicase LGP2 (EC 3.6.1.-) (Protein D11Lgp2 homolog).; n=1; Takifugu rubripes Rep: Probable ATP-dependent helicase LGP2 (EC 3.6.1.-) (Protein D11Lgp2 homolog). - Takifugu rubripes |
| 37073 | 2.84 | 0.30 | 0.0009 | 0.0150 | 2.08 | sb_gmnbpic_0005b03.pD NRF2    | EPSTI1 protein; n=3; Bos taurus Rep: EPSTI1 protein - Bos taurus (Bovine)                                                                                                                                  |
| 46192 | 3.77 | 0.21 | 0.0001 | 0.0037 | 2.08 | all_v2.0.8585 .C1             | RVT_1 domain containing protein                                                                                                                                                                            |
| 48258 | 2.69 | 0.37 | 0.0015 | 0.0197 | 2.07 | all_v2.0.1492 6.C1            | Unassigned protein                                                                                                                                                                                         |
| 45976 | 3.85 | 0.19 | 0.0001 | 0.0034 | 2.06 | sb_gmnlkfta_0007d22.t7        | pbe1; pre-B-cell colony enhancing factor 1                                                                                                                                                                 |
| 54223 | 2.92 | 0.32 | 0.0007 | 0.0132 | 2.06 | all_v2.0.6859 .C3             | unclassified                                                                                                                                                                                               |
| 54489 | 2.42 | 0.30 | 0.0032 | 0.0309 | 2.06 | all_v2.0.776. C1              | unclassified                                                                                                                                                                                               |
| 36201 | 2.97 | 0.26 | 0.0007 | 0.0123 | 2.05 | all_v2.0.1758 .C1             | Blue-sensitive pigment; n=1; Gadus morhua Rep: Blue-sensitive pigment - Gadus morhua (Atlantic cod)                                                                                                        |
| 36625 | 3.28 | 0.27 | 0.0003 | 0.0073 | 2.05 | sb_gmnbpcic_0006c06.pD NRm13r | Complement component C9; n=1; Paralichthys olivaceus Rep: Complement component C9 - Paralichthys olivaceus (Japanese flounder)                                                                             |
| 36407 | 2.57 | 0.42 | 0.0021 | 0.0237 | 2.05 | all_v2.0.1864 .C7             | CD9 protein; n=1; Oncorhynchus mykiss Rep: CD9 protein - Oncorhynchus mykiss (Rainbow trout) (Salmo gairdneri)                                                                                             |
| 42585 | 4.13 | 0.18 | 0.0001 | 0.0025 | 2.05 | all_v2.0.2335 .C1             | Titin a; n=3; Danio rerio Rep: Titin a - Danio rerio (Zebrafish) (Brachydanio rerio)                                                                                                                       |
| 37226 | 2.92 | 0.26 | 0.0008 | 0.0132 | 2.04 | all_v2.0.556. C2              | Fibroblast growth factor (Acidic) intracellular binding protein; n=2; Danio rerio Rep: Fibroblast growth factor (Acidic) intracellular binding protein - Danio rerio (Zebrafish) (Brachydanio rerio)       |

|       |      |      |        |        |      |                                      |                                                                                                                                                                                                                 |
|-------|------|------|--------|--------|------|--------------------------------------|-----------------------------------------------------------------------------------------------------------------------------------------------------------------------------------------------------------------|
| 51314 | 2.47 | 0.35 | 0.0027 | 0.0277 | 2.04 | all_v2.0.6744<br>.C1                 | unclassified                                                                                                                                                                                                    |
| 54924 | 2.93 | 0.30 | 0.0007 | 0.0130 | 2.04 | all_v2.0.1234<br>4.C1                | unclassified                                                                                                                                                                                                    |
| 37698 | 4.95 | 0.13 | 0.0000 | 0.0016 | 2.04 | sb_gmnbpcic<br>_0001e04.pD<br>NRm13r | Homolog of Brachydanio rerio Cyclin L ania-6a.;<br>n=2; Takifugu rubripes Rep: Homolog of<br>Brachydanio rerio Cyclin L ania-6a. - Takifugu<br>rubripes                                                         |
| 39363 | 3.80 | 0.18 | 0.0001 | 0.0036 | 2.03 | all_v2.0.1770<br>6.C1                | Novel gene; n=1; Danio rerio Rep: Novel gene -<br>Danio rerio                                                                                                                                                   |
| 39371 | 2.89 | 0.25 | 0.0008 | 0.0138 | 2.03 | sb_gmnbhkas<br>_0007i12.pD<br>NRF2   | Novel immune-type receptor 4; n=2;<br>Oncorhynchus mykiss Rep: Novel immune-type<br>receptor 4 - Oncorhynchus mykiss (Rainbow trout)<br>(Salmo gairdneri)                                                       |
| 45510 | 2.76 | 0.36 | 0.0012 | 0.0176 | 2.03 | all_v2.0.1847<br>9.C1.a              | non-directed                                                                                                                                                                                                    |
| 49472 | 3.73 | 0.19 | 0.0001 | 0.0038 | 2.03 | all_v2.0.1290<br>9.C1                | unclassified                                                                                                                                                                                                    |
| 44615 | 3.41 | 0.21 | 0.0002 | 0.0060 | 2.03 | TLR9Cend                             | custom - toll-like receptor 9                                                                                                                                                                                   |
| 46309 | 4.08 | 0.17 | 0.0001 | 0.0026 | 2.02 | sb_gmapht_0<br>002g19.pDN<br>RF2     | TatC domain containing protein                                                                                                                                                                                  |
| 43354 | 2.55 | 0.35 | 0.0022 | 0.0245 | 2.02 | all_v2.0.772.<br>C1                  | Zgc:101851; n=2; Danio rerio Rep: Zgc:101851 -<br>Danio rerio (Zebrafish) (Brachydanio rerio)                                                                                                                   |
| 40018 | 5.35 | 0.11 | 0.0000 | 0.0015 | 2.01 | all_v2.0.7260<br>.C1                 | Pol polyprotein; n=1; Nosema bombycis Rep: Pol<br>polyprotein - Nosema bombycis                                                                                                                                 |
| 51588 | 3.32 | 0.22 | 0.0003 | 0.0069 | 2.01 | all_v2.0.1470<br>1.C1                | unclassified                                                                                                                                                                                                    |
| 51377 | 2.88 | 0.28 | 0.0008 | 0.0140 | 2.01 | all_v2.0.2972<br>.C1                 | unclassified                                                                                                                                                                                                    |
| 37854 | 2.94 | 0.25 | 0.0007 | 0.0127 | 2.01 | sb_gmnlfsfc_<br>0002b12.t7           | Homolog of Carassius auratus Interferon-inducible<br>protein Gig2.; n=4; Takifugu rubripes Rep:<br>Homolog of Carassius auratus Interferon-inducible<br>protein Gig2. - Takifugu rubripes                       |
| 50391 | 2.53 | 0.28 | 0.0023 | 0.0253 | 2.01 | all_v2.0.2069<br>.C2                 | unclassified                                                                                                                                                                                                    |
| 55249 | 3.69 | 0.20 | 0.0001 | 0.0040 | 2.00 | all_v2.0.3039<br>.C5                 | unclassified                                                                                                                                                                                                    |
| 40091 | 2.92 | 0.27 | 0.0007 | 0.0131 | 2.00 | sb_gmapov_0<br>008b19.pDN<br>RF2     | Polyribonucleotide nucleotidyltransferase 1,<br>mitochondrial precursor; n=18;<br>Euarchontoglires Rep: Polyribonucleotide<br>nucleotidyltransferase 1, mitochondrial precursor -<br>Homo sapiens (Human)       |
| 43990 | 2.54 | 0.41 | 0.0023 | 0.0250 | 2.00 | sb_gmnbpcic<br>_0010b03.pD<br>NRm13r | Zgc:85932; n=5; Danio rerio Rep: Zgc:85932 -<br>Danio rerio (Zebrafish) (Brachydanio rerio)                                                                                                                     |
| 53347 | 2.96 | 0.26 | 0.0007 | 0.0123 | 1.99 | all_v2.0.9197<br>.C1                 | unclassified                                                                                                                                                                                                    |
| 44665 | 3.87 | 0.19 | 0.0001 | 0.0033 | 1.99 | all_v2.0.1356<br>7.C1                | Drf_FH1 multi-domain protein                                                                                                                                                                                    |
| 48557 | 3.01 | 0.25 | 0.0006 | 0.0116 | 1.99 | sb_gmnbpic<br>_0009m06.p<br>DNRm13r  | Unassigned protein                                                                                                                                                                                              |
| 45372 | 2.54 | 0.27 | 0.0022 | 0.0249 | 1.98 | all_v2.0.433.<br>C1                  | LYR motif-containing protein ENSP00000368165                                                                                                                                                                    |
| 44351 | 3.43 | 0.22 | 0.0002 | 0.0058 | 1.98 | all_v2.0.693.<br>C1                  | C2 domain containing protein<br>PREDICTED: similar to purple acid phosphatase,<br>putative, partial; n=2; Danio rerio Rep:<br>PREDICTED: similar to purple acid phosphatase,<br>putative, partial - Danio rerio |
| 40902 | 4.30 | 0.15 | 0.0000 | 0.0021 | 1.98 | sb_gmapov_0<br>017b09.pDN<br>RF2     | Si:dkey-21k10.1 protein; n=3; Danio rerio Rep:<br>Si:dkey-21k10.1 protein - Danio rerio (Zebrafish)<br>(Brachydanio rerio)                                                                                      |
| 42172 | 4.15 | 0.17 | 0.0001 | 0.0025 | 1.98 | sb_gmnl1a_00<br>45h19.t7             | PREDICTED: similar to ATPase, histidine kinase-,<br>DNA gyrase B-, and HSP90-like domain<br>containing protein; n=2; Danio rerio Rep:                                                                           |
| 40238 | 4.42 | 0.14 | 0.0000 | 0.0020 | 1.98 | all_v2.0.1325<br>6.C1                | PREDICTED: similar to ATPase, histidine kinase-,<br>DNA gyrase B-, and HSP90-like domain                                                                                                                        |



|       |      |      |        |        |      |                                       |                                                                                                                                                                                                                                                                                                                     |
|-------|------|------|--------|--------|------|---------------------------------------|---------------------------------------------------------------------------------------------------------------------------------------------------------------------------------------------------------------------------------------------------------------------------------------------------------------------|
| 40238 | 4.42 | 0.14 | 0.0000 | 0.0020 | 1.98 | all_v2.0.1325<br>6.C1                 | PREDICTED: similar to ATPase, histidine kinase-, DNA gyrase B-, and HSP90-like domain containing protein; n=2; Danio rerio Rep: PREDICTED: similar to ATPase, histidine kinase-, DNA gyrase B-, and HSP90-like domain containing protein - Danio rerio                                                              |
| 36895 | 3.12 | 0.24 | 0.0004 | 0.0096 | 1.98 | all_v2.0.1142<br>6.C2                 | DNA polymerase; n=2; Tetraodontidae Rep: DNA polymerase - Tetraodon nigroviridis (Green puffer)                                                                                                                                                                                                                     |
| 51058 | 2.46 | 0.37 | 0.0028 | 0.0284 | 1.98 | all_v2.0.1178<br>1.C2                 | unclassified                                                                                                                                                                                                                                                                                                        |
| 38695 | 2.66 | 0.27 | 0.0016 | 0.0204 | 1.97 | all_v2.0.7632<br>.C1                  | K14 protein; n=1; Xenopus laevis Rep: K14 protein - Xenopus laevis (African clawed frog)                                                                                                                                                                                                                            |
| 53650 | 3.21 | 0.21 | 0.0003 | 0.0081 | 1.97 | all_v2.0.1721<br>9.C1                 | unclassified<br>PREDICTED: similar to factor activating exoenzyme S; n=1; Ornithorhynchus anatinus Rep: PREDICTED: similar to factor activating exoenzyme S - Ornithorhynchus anatinus                                                                                                                              |
| 40456 | 2.62 | 0.36 | 0.0018 | 0.0216 | 1.97 | all_v2.0.3858<br>.C1                  | Zgc:64137; n=2; Danio rerio Rep: Zgc:64137 - Danio rerio (Zebrafish) (Brachydanio rerio)                                                                                                                                                                                                                            |
| 43897 | 3.98 | 0.17 | 0.0001 | 0.0028 | 1.96 | all_v2.0.8033<br>.C1                  | unclassified                                                                                                                                                                                                                                                                                                        |
| 49652 | 2.66 | 0.30 | 0.0016 | 0.0206 | 1.95 | all_v2.0.9970<br>.C1                  | Zgc:153440; n=3; Danio rerio Rep: Zgc:153440 - Danio rerio (Zebrafish) (Brachydanio rerio)                                                                                                                                                                                                                          |
| 43681 | 2.52 | 0.29 | 0.0024 | 0.0258 | 1.95 | all_v2.0.6826<br>.C2                  | non-directed                                                                                                                                                                                                                                                                                                        |
| 45487 | 2.60 | 0.34 | 0.0019 | 0.0226 | 1.95 | all_v2.0.1102<br>1.C1                 | Unassigned protein<br>Bloodthirsty; n=2; Notothenioidei Rep: Bloodthirsty - Chaenocephalus aceratus (White crocodile fish)                                                                                                                                                                                          |
| 47368 | 2.90 | 0.30 | 0.0008 | 0.0136 | 1.95 | sb_gmnl1a_00<br>36m01.t7              | unclassified<br>Alpha-2-macroglobulin; n=1; Sparus aurata Rep: Alpha-2-macroglobulin - Sparus aurata (Gilthead sea bream)                                                                                                                                                                                           |
| 36189 | 5.17 | 0.11 | 0.0000 | 0.0016 | 1.95 | all_v2.0.661.<br>C31                  | N-acylneuraminate-9-phosphatase (EC 3.1.3.29) (Neu5Ac-9-Pase) (Haloacid dehalogenase-like hydrolase domain-containing protein 4); n=1; Takifugu rubripes Rep: N-acylneuraminate-9-phosphatase (EC 3.1.3.29) (Neu5Ac-9-Pase) (Haloacid dehalogenase-like hydrolase domain-containing protein 4). - Takifugu rubripes |
| 52110 | 5.57 | 0.09 | 0.0000 | 0.0014 | 1.95 | all_v2.0.8876<br>.C1                  | Zgc:63602; n=2; Danio rerio Rep: Zgc:63602 - Danio rerio (Zebrafish) (Brachydanio rerio)                                                                                                                                                                                                                            |
| 35877 | 3.51 | 0.19 | 0.0002 | 0.0052 | 1.94 | all_v2.0.2896<br>.C1                  | Homolog of Homo sapiens Similar to SH3-containing protein p4015; n=1; Takifugu rubripes Rep: Homolog of Homo sapiens Similar to SH3-containing protein p4015 - Takifugu rubripes                                                                                                                                    |
| 39240 | 2.42 | 0.29 | 0.0032 | 0.0306 | 1.94 | all_v2.0.1198<br>7.C1                 | Unassigned protein                                                                                                                                                                                                                                                                                                  |
| 43876 | 2.42 | 0.38 | 0.0032 | 0.0306 | 1.93 | all_v2.0.1930<br>.C13                 | Unassigned protein                                                                                                                                                                                                                                                                                                  |
| 38330 | 3.16 | 0.21 | 0.0004 | 0.0090 | 1.93 | sb_gmnl1fas_<br>0002f20.t7            | Unassigned protein                                                                                                                                                                                                                                                                                                  |
| 48640 | 3.54 | 0.20 | 0.0002 | 0.0049 | 1.93 | sb_gmnl1a_00<br>18p21.t7              | Unassigned protein                                                                                                                                                                                                                                                                                                  |
| 47411 | 4.37 | 0.14 | 0.0000 | 0.0020 | 1.92 | sb_gmnl1skic_<br>0010l20.pDN<br>Rm13r | Unassigned protein<br>Ribosomal protein L32; n=5; Euteleostei Rep: Ribosomal protein L32 - Oncorhynchus masou formosanus                                                                                                                                                                                            |
| 41894 | 4.25 | 0.15 | 0.0000 | 0.0023 | 1.92 | all_v2.0.2051<br>.C1                  | unclassified                                                                                                                                                                                                                                                                                                        |
| 49387 | 2.53 | 0.29 | 0.0023 | 0.0254 | 1.91 | all_v2.0.1251<br>5.C1                 | Zgc:158652 protein; n=3; Danio rerio Rep: Zgc:158652 protein - Danio rerio (Zebrafish) (Brachydanio rerio)                                                                                                                                                                                                          |
| 43767 | 3.47 | 0.18 | 0.0002 | 0.0055 | 1.91 | all_v2.0.8336<br>.C1                  | Cofilin-1-A; n=2; Xenopus laevis Rep: Cofilin-1-A - Xenopus laevis (African clawed frog)                                                                                                                                                                                                                            |
| 36552 | 2.85 | 0.23 | 0.0009 | 0.0149 | 1.90 | all_v2.0.1104<br>.C1                  | Ras-related protein Rab-10; n=18; Gnathostomata Rep: Ras-related protein Rab-10 - Homo sapiens (Human)                                                                                                                                                                                                              |
| 41703 | 5.38 | 0.09 | 0.0000 | 0.0015 | 1.90 | all_v2.0.1130<br>.C1                  | Homolog of Homo sapiens Spastic ataxia of Charlevoix-Saguenay; n=1; Takifugu rubripes Rep: Homolog of Homo sapiens Spastic ataxia of Charlevoix-Saguenay - Takifugu rubripes                                                                                                                                        |

|       |      |      |        |        |      |                                    |                                                                                                                                                                                                                                                                                                                                                                                                                                                              |
|-------|------|------|--------|--------|------|------------------------------------|--------------------------------------------------------------------------------------------------------------------------------------------------------------------------------------------------------------------------------------------------------------------------------------------------------------------------------------------------------------------------------------------------------------------------------------------------------------|
| 51766 | 3.09 | 0.24 | 0.0005 | 0.0099 | 1.89 | all_v2.0.2438<br>.C2               | unclassified<br>Transposase; n=1; Strongylocentrotus<br>purpuratus Rep: Transposase - Strongylocentrotus<br>purpuratus (Purple sea urchin)                                                                                                                                                                                                                                                                                                                   |
| 42781 | 2.89 | 0.26 | 0.0008 | 0.0136 | 1.89 | all_v2.0.1519<br>6.C1              | CC chemokine type 2; n=1; Gadus morhua Rep:<br>CC chemokine type 2 - Gadus morhua (Atlantic<br>cod)                                                                                                                                                                                                                                                                                                                                                          |
| 36380 | 4.33 | 0.14 | 0.0000 | 0.0021 | 1.89 | all_v2.0.132.<br>C8                | UPI0000D8BA1C related cluster; n=1; Danio<br>rerio Rep: UPI0000D8BA1C UniRef100 entry -<br>Danio rerio                                                                                                                                                                                                                                                                                                                                                       |
| 43012 | 2.99 | 0.21 | 0.0006 | 0.0119 | 1.88 | all_v2.0.9212<br>.C1               |                                                                                                                                                                                                                                                                                                                                                                                                                                                              |
| 54050 | 4.10 | 0.14 | 0.0001 | 0.0025 | 1.88 | all_v2.0.9224<br>.C1               | unclassified<br>PREDICTED: similar to Ubiquitin carboxyl-<br>terminal hydrolase 5 (Ubiquitin thioesterase 5)<br>(Ubiquitin-specific-processing protease 5)<br>(Deubiquitinating enzyme 5) (Isopeptidase T);<br>n=2; Homo/Pan/Gorilla group Rep: PREDICTED:<br>similar to Ubiquitin carboxyl-terminal hydrolase 5<br>(Ubiquitin thioesterase 5) (Ubiquitin-specific-<br>processing protease 5) (Deubiquitinating enzyme<br>5) (Isopeptidase T) - Homo sapiens |
| 41181 | 4.00 | 0.15 | 0.0001 | 0.0028 | 1.88 | all_v2.0.1451<br>9.C1              |                                                                                                                                                                                                                                                                                                                                                                                                                                                              |
| 46431 | 2.63 | 0.32 | 0.0017 | 0.0215 | 1.88 | all_v2.0.1507<br>6.C1              | Unassigned protein                                                                                                                                                                                                                                                                                                                                                                                                                                           |
| 42754 | 3.72 | 0.17 | 0.0001 | 0.0039 | 1.87 | sb_gmnbhkas<br>_0008c11.pD<br>NRF2 | Transport-associated protein; n=3;<br>Salmonidae Rep: Transport-associated protein -<br>Salmo salar (Atlantic salmon)                                                                                                                                                                                                                                                                                                                                        |
| 52391 | 3.88 | 0.15 | 0.0001 | 0.0032 | 1.87 | all_v2.0.8469<br>.C1               | unclassified                                                                                                                                                                                                                                                                                                                                                                                                                                                 |
| 53177 | 2.77 | 0.26 | 0.0012 | 0.0173 | 1.86 | all_v2.0.9872<br>.C1               | unclassified                                                                                                                                                                                                                                                                                                                                                                                                                                                 |
| 53400 | 2.75 | 0.25 | 0.0012 | 0.0178 | 1.86 | all_v2.0.1718<br>.C1               | unclassified                                                                                                                                                                                                                                                                                                                                                                                                                                                 |
| 43487 | 3.56 | 0.17 | 0.0002 | 0.0049 | 1.86 | all_v2.0.5034<br>.C1               | Zgc:112064; n=4; Danio rerio Rep: Zgc:112064 -<br>Danio rerio (Zebrafish) (Brachydanio rerio)                                                                                                                                                                                                                                                                                                                                                                |
| 41942 | 3.16 | 0.20 | 0.0004 | 0.0089 | 1.86 | all_v2.0.8660<br>.C1               | RING finger protein 213; n=3; Homo sapiens Rep:<br>RING finger protein 213 - Homo sapiens (Human)                                                                                                                                                                                                                                                                                                                                                            |
| 48323 | 2.41 | 0.35 | 0.0032 | 0.0310 | 1.86 | sb_gmnbhkic<br>_0005f18.pD<br>NRF2 | Unassigned protein                                                                                                                                                                                                                                                                                                                                                                                                                                           |
| 52620 | 2.99 | 0.23 | 0.0006 | 0.0119 | 1.85 | all_v2.0.1287<br>0.C1              | unclassified                                                                                                                                                                                                                                                                                                                                                                                                                                                 |
| 51093 | 4.61 | 0.12 | 0.0000 | 0.0018 | 1.85 | all_v2.0.1526<br>6.C2              | unclassified                                                                                                                                                                                                                                                                                                                                                                                                                                                 |
| 43935 | 2.57 | 0.27 | 0.0020 | 0.0237 | 1.85 | all_v2.0.9690<br>.C1               | Zgc:73238; n=1; Danio rerio Rep: Zgc:73238 -<br>Danio rerio (Zebrafish) (Brachydanio rerio)                                                                                                                                                                                                                                                                                                                                                                  |
| 49744 | 2.62 | 0.23 | 0.0018 | 0.0219 | 1.85 | all_v2.0.9839<br>.C1               | unclassified                                                                                                                                                                                                                                                                                                                                                                                                                                                 |
| 38607 | 2.64 | 0.24 | 0.0017 | 0.0214 | 1.84 | all_v2.0.7062<br>.C1               | Interferon stimulated gene 15; n=1; Gadus<br>morhua Rep: Interferon stimulated gene 15 - Gadus<br>morhua (Atlantic cod)                                                                                                                                                                                                                                                                                                                                      |
| 51924 | 2.47 | 0.26 | 0.0027 | 0.0277 | 1.84 | all_v2.0.7974<br>.C1               | unclassified                                                                                                                                                                                                                                                                                                                                                                                                                                                 |
| 40262 | 3.47 | 0.18 | 0.0002 | 0.0055 | 1.84 | sb_gmapht_0<br>030a18.pDN<br>RF2   | PREDICTED: similar to bloodthirsty; n=2; Danio<br>rerio Rep: PREDICTED: similar to bloodthirsty -<br>Danio rerio                                                                                                                                                                                                                                                                                                                                             |
| 47614 | 2.42 | 0.37 | 0.0032 | 0.0306 | 1.84 | sb_gmnl1a_00<br>37d01.t7           | Unassigned protein                                                                                                                                                                                                                                                                                                                                                                                                                                           |
| 54046 | 4.04 | 0.14 | 0.0001 | 0.0026 | 1.83 | all_v2.0.5705<br>.C1               | unclassified                                                                                                                                                                                                                                                                                                                                                                                                                                                 |
| 35894 | 4.17 | 0.13 | 0.0001 | 0.0024 | 1.82 | all_v2.0.1693<br>9.C1              | Aminopeptidase N; n=2; Pseudopleuronectes<br>americanus Rep: Aminopeptidase N -<br>Pseudopleuronectes americanus (Winter flounder)<br>(Pleuronectesamericanus)                                                                                                                                                                                                                                                                                               |
| 35555 | 2.42 | 0.26 | 0.0032 | 0.0310 | 1.82 | all_v2.0.384.<br>C1                | 1MDa_1 protein; n=3; Caenorhabditis<br>elegans Rep: 1MDa_1 protein - Caenorhabditis<br>elegans                                                                                                                                                                                                                                                                                                                                                               |
| 45954 | 2.50 | 0.32 | 0.0025 | 0.0266 | 1.82 | sb_gmnbhkas<br>_0006c23.pD         | NSL1, MIND kinetochore complex component,<br>homolog [Gallus gallus] dbj BAE93420.1  Nsl1                                                                                                                                                                                                                                                                                                                                                                    |

|       |      |      |        |        |      | NRF2                   | protein [Gallus gallus]                                                                                                                                                                                                               |
|-------|------|------|--------|--------|------|------------------------|---------------------------------------------------------------------------------------------------------------------------------------------------------------------------------------------------------------------------------------|
| 42145 | 2.43 | 0.24 | 0.0031 | 0.0300 | 1.82 | sb_gmnlkfc_0001b01.t7  | Shmt2 protein; n=3; Xenopus Rep: Shmt2 protein - Xenopus tropicalis (Western clawed frog) (Silurana tropicalis)                                                                                                                       |
| 39975 | 3.31 | 0.19 | 0.0003 | 0.0070 | 1.81 | all_v2.0.4370.C3       | Phospholipase D4; n=3; Murinae Rep: Phospholipase D4 - Mus musculus (Mouse)                                                                                                                                                           |
| 36381 | 2.56 | 0.29 | 0.0021 | 0.0244 | 1.81 | all_v2.0.132.C9        | CC chemokine type 2; n=1; Gadus morhua Rep: CC chemokine type 2 - Gadus morhua (Atlantic cod)                                                                                                                                         |
| 38619 | 3.78 | 0.14 | 0.0001 | 0.0037 | 1.81 | all_v2.0.3448.C5       | Interferon-inducible protein G1g1; n=1; Psetta maxima Rep: Interferon-inducible protein G1g1 - Scophthalmus maximus (Turbot)                                                                                                          |
| 45146 | 4.33 | 0.12 | 0.0000 | 0.0021 | 1.81 | sb_gmnbhkc_0005i22.pDN | LOC555735; similar to DNA methyltransferase                                                                                                                                                                                           |
| 51265 | 2.47 | 0.25 | 0.0027 | 0.0278 | 1.81 | NRm13r                 | unclassified                                                                                                                                                                                                                          |
| 52488 | 3.68 | 0.15 | 0.0001 | 0.0041 | 1.81 | all_v2.0.1446.8.C1     | unclassified                                                                                                                                                                                                                          |
| 51788 | 2.55 | 0.26 | 0.0022 | 0.0245 | 1.81 | all_v2.0.1091.6.C1     | unclassified                                                                                                                                                                                                                          |
| 44197 | 2.99 | 0.22 | 0.0006 | 0.0119 | 1.80 | all_v2.0.1046.3.C1     | unclassified                                                                                                                                                                                                                          |
| 40187 | 2.59 | 0.26 | 0.0019 | 0.0228 | 1.80 | sb_gmnlksc_0013o14.pDN | [E] COG2008 Threonine aldolase                                                                                                                                                                                                        |
| 46606 | 3.43 | 0.16 | 0.0002 | 0.0058 | 1.80 | Rm13r                  | PREDICTED: similar to actin-related protein 3-beta; n=1; Bos taurus Rep: PREDICTED: similar to actin-related protein 3-beta - Bos taurus                                                                                              |
| 43314 | 3.12 | 0.18 | 0.0004 | 0.0096 | 1.79 | sb_gmnlsc_011g08.t7    | Unassigned protein                                                                                                                                                                                                                    |
| 42231 | 2.98 | 0.22 | 0.0006 | 0.0121 | 1.79 | all_v2.0.8980.C1       | Zgc:101649; n=3; Danio rerio Rep: Zgc:101649 - Danio rerio (Zebrafish) (Brachydanio rerio)                                                                                                                                            |
| 37820 | 2.57 | 0.24 | 0.0021 | 0.0237 | 1.79 | all_v2.0.3901.C1       | Skeletal muscle myosin heavy chain light meromyosin; n=10; Clupeocephala Rep: Skeletal muscle myosin heavy chain light meromyosin - Clupea harengus (Atlantic herring)                                                                |
| 48342 | 3.74 | 0.14 | 0.0001 | 0.0038 | 1.79 | all_v2.0.2700.C3       | Homolog of Brachydanio rerio Sulfotransferase family, cytosolic sulfotransferase 2.; n=1; Takifugu rubripes Rep: Homolog of Brachydanio rerio Sulfotransferase family, cytosolic sulfotransferase 2 - Takifugu rubripes               |
| 54421 | 2.99 | 0.20 | 0.0006 | 0.0119 | 1.79 | sb_gmnlsc_014f04.t7    | Unassigned protein                                                                                                                                                                                                                    |
| 38436 | 3.63 | 0.16 | 0.0001 | 0.0043 | 1.79 | all_v2.0.1129.C1       | unclassified                                                                                                                                                                                                                          |
| 37232 | 2.96 | 0.20 | 0.0007 | 0.0123 | 1.79 | sb_gmapov_005h22.pDN   | Homolog of Homo sapiens Vacuolar sorting protein 54 long isoform; n=1; Takifugu rubripes Rep: Homolog of Homo sapiens Vacuolar sorting protein 54 long isoform - Takifugu rubripes                                                    |
| 38828 | 3.62 | 0.15 | 0.0001 | 0.0044 | 1.79 | RF2                    | FK506 binding protein 4; n=3; Danio rerio Rep: FK506 binding protein 4 - Danio rerio (Zebrafish) (Brachydanio rerio)                                                                                                                  |
| 40442 | 2.62 | 0.22 | 0.0018 | 0.0219 | 1.78 | all_v2.0.4884.C1       | LOC553437 protein; n=2; Danio rerio Rep: LOC553437 protein - Brachydanio rerio (Zebrafish) (Danio rerio)                                                                                                                              |
| 51579 | 2.96 | 0.19 | 0.0007 | 0.0124 | 1.78 | all_v2.0.1029.4.C1     | PREDICTED: similar to EPB49 protein; n=2; Danio rerio Rep: PREDICTED: similar to EPB49 protein - Danio rerio                                                                                                                          |
| 41628 | 3.13 | 0.18 | 0.0004 | 0.0094 | 1.78 | all_v2.0.1729.9.C1     | unclassified                                                                                                                                                                                                                          |
| 43147 | 2.90 | 0.22 | 0.0008 | 0.0136 | 1.78 | all_v2.0.1080.2.C1     | Putative helicase MOV-10 (EC 3.6.1.-) (Moloney leukemia virus 10 protein).; n=1; Takifugu rubripes Rep: Putative helicase MOV-10 (EC 3.6.1.-) (Moloney leukemia virus 10 protein). - Takifugu rubripes                                |
|       |      |      |        |        |      | all_v2.0.4262.C1       | Vacuolar ATP synthase subunit S1 precursor (EC 3.6.3.14) (V-ATPase subunit S1) (V-ATPase S1 accessory protein) (V-ATPase Ac45 subunit) (XAP-3).; n=1; Takifugu rubripes Rep: Vacuolar ATP synthase subunit S1 precursor (EC 3.6.3.14) |

|       |      |      |        |        |      |                               |                                                                                                                                                                                                                                               |
|-------|------|------|--------|--------|------|-------------------------------|-----------------------------------------------------------------------------------------------------------------------------------------------------------------------------------------------------------------------------------------------|
|       |      |      |        |        |      |                               | (V-ATPase subunit S1) (V-ATPase S1 accessory protein) (V-ATPase Ac45 subunit) (XAP-3). - Takifugu rubripes                                                                                                                                    |
|       |      |      |        |        |      |                               | PREDICTED: similar to CDK2 (cyclin-dependent kinase 2)-associated protein 1; n=2; Canis lupus familiaris Rep: PREDICTED: similar to CDK2 (cyclin-dependent kinase 2)-associated protein 1 - Canis familiaris                                  |
| 40304 | 2.51 | 0.24 | 0.0024 | 0.0260 | 1.77 | all_v2.0.2720.C1              |                                                                                                                                                                                                                                               |
| 49026 | 3.04 | 0.20 | 0.0005 | 0.0108 | 1.77 | all_v2.0.270.C2               | Unassigned protein                                                                                                                                                                                                                            |
| 50350 | 3.24 | 0.17 | 0.0003 | 0.0077 | 1.77 | all_v2.0.6687.C1              | unclassified                                                                                                                                                                                                                                  |
| 54199 | 2.60 | 0.22 | 0.0019 | 0.0226 | 1.77 | all_v2.0.7185.C1              | unclassified                                                                                                                                                                                                                                  |
| 51423 | 3.03 | 0.20 | 0.0006 | 0.0109 | 1.77 | all_v2.0.7996.C1              | unclassified                                                                                                                                                                                                                                  |
| 52306 | 2.52 | 0.22 | 0.0024 | 0.0256 | 1.76 | all_v2.0.1473.2.C1            | unclassified                                                                                                                                                                                                                                  |
| 46576 | 2.85 | 0.21 | 0.0009 | 0.0148 | 1.76 | all_v2.0.4.C2.13              | Unassigned protein                                                                                                                                                                                                                            |
| 55434 | 3.81 | 0.14 | 0.0001 | 0.0036 | 1.76 | all_v2.0.8005.C1              | unclassified                                                                                                                                                                                                                                  |
|       |      |      |        |        |      |                               | Proteasome subunit alpha type 6-like protein; n=1; Xenopsylla cheopis Rep: Proteasome subunit alpha type 6-like protein - Xenopsylla cheopis (oriental rat flea)                                                                              |
| 41414 | 2.91 | 0.21 | 0.0008 | 0.0133 | 1.76 | sb_gmnlsfic_0008p05.t7        |                                                                                                                                                                                                                                               |
| 52513 | 2.66 | 0.25 | 0.0016 | 0.0206 | 1.75 | all_v2.0.1403.2.C1            | unclassified                                                                                                                                                                                                                                  |
|       |      |      |        |        |      |                               | Small nuclear ribonucleoprotein polypeptide A; n=2; Danio rerio Rep: Small nuclear ribonucleoprotein polypeptide A - Danio rerio (Zebrafish) (Brachydanio rerio)                                                                              |
| 42246 | 2.61 | 0.24 | 0.0018 | 0.0221 | 1.75 | all_v2.0.1404.5.C1            |                                                                                                                                                                                                                                               |
| 48810 | 2.77 | 0.21 | 0.0012 | 0.0172 | 1.75 | all_v2.0.7149.C2              | Unassigned protein                                                                                                                                                                                                                            |
| 44092 | 3.74 | 0.14 | 0.0001 | 0.0038 | 1.74 | all_v2.0.3277.C1              | Zgc:92698; n=3; Danio rerio Rep: Zgc:92698 - Danio rerio (Zebrafish) (Brachydanio rerio)                                                                                                                                                      |
| 51254 | 2.88 | 0.19 | 0.0008 | 0.0140 | 1.74 | all_v2.0.9392.C1              | unclassified                                                                                                                                                                                                                                  |
|       |      |      |        |        |      |                               |                                                                                                                                                                                                                                               |
| 46150 | 2.72 | 0.25 | 0.0013 | 0.0187 | 1.74 | sb_gmnbpcic_0001122.pD.NRm13r | RGD1311345; similar to CG9752-PA Chemokine CXC-like protein; n=1; Psetta maxima Rep: Chemokine CXC-like protein - Scophthalmus maximus (Turbot)                                                                                               |
| 36482 | 3.74 | 0.13 | 0.0001 | 0.0038 | 1.74 | all_v2.0.1745.C2              |                                                                                                                                                                                                                                               |
| 44663 | 4.21 | 0.11 | 0.0000 | 0.0023 | 1.74 | all_v2.0.7931.C1              | Drf_FH1 multi-domain protein                                                                                                                                                                                                                  |
| 47291 | 3.33 | 0.15 | 0.0003 | 0.0068 | 1.74 | all_v2.0.606.C2               | Unassigned protein                                                                                                                                                                                                                            |
| 51908 | 3.54 | 0.14 | 0.0002 | 0.0049 | 1.74 | all_v2.0.1447.8.C1            | unclassified                                                                                                                                                                                                                                  |
|       |      |      |        |        |      |                               | Beta2-microglobulin precursor; n=3; Gadus morhua Rep: Beta2-microglobulin precursor - Gadus morhua (Atlantic cod)                                                                                                                             |
| 36142 | 4.90 | 0.08 | 0.0000 | 0.0017 | 1.73 | all_v2.0.2387.C5              |                                                                                                                                                                                                                                               |
| 43282 | 2.44 | 0.30 | 0.0030 | 0.0294 | 1.73 | all_v2.0.1239.3.C1            | Zgc:100817; n=1; Danio rerio Rep: Zgc:100817 - Danio rerio (Zebrafish) (Brachydanio rerio)                                                                                                                                                    |
| 54087 | 2.42 | 0.24 | 0.0032 | 0.0310 | 1.72 | all_v2.0.4115.C1              | unclassified                                                                                                                                                                                                                                  |
| 53644 | 2.69 | 0.23 | 0.0014 | 0.0194 | 1.72 | all_v2.0.1077.4.C1            | unclassified                                                                                                                                                                                                                                  |
| 47988 | 4.13 | 0.11 | 0.0001 | 0.0025 | 1.72 | all_v2.0.1290.0.C1            | Unassigned protein                                                                                                                                                                                                                            |
|       |      |      |        |        |      |                               |                                                                                                                                                                                                                                               |
| 47750 | 2.49 | 0.25 | 0.0026 | 0.0272 | 1.72 | sb_gmnbhkc_0009m05.p.DNRF2    | Unassigned protein                                                                                                                                                                                                                            |
|       |      |      |        |        |      |                               | Phospholipase D4 (EC 3.1.4.4) (PLD 4) (Choline phosphatase 4) (Phosphatidylcholine-hydrolyzing phospholipase D4).; n=1; Takifugu rubripes Rep: Phospholipase D4 (EC 3.1.4.4) (PLD 4) (Choline phosphatase 4) (Phosphatidylcholine-hydrolyzing |
| 39974 | 3.18 | 0.17 | 0.0004 | 0.0087 | 1.72 | all_v2.0.1628.3.C1            |                                                                                                                                                                                                                                               |

|       |      |      |        |        |      |                                  |                                                                                                                                                                                                                                                                                                                                                                                                                                                                                                                |
|-------|------|------|--------|--------|------|----------------------------------|----------------------------------------------------------------------------------------------------------------------------------------------------------------------------------------------------------------------------------------------------------------------------------------------------------------------------------------------------------------------------------------------------------------------------------------------------------------------------------------------------------------|
| 39974 | 3.18 | 0.17 | 0.0004 | 0.0087 | 1.72 | all_v2.0.1628<br>3.C1            | Phospholipase D4 (EC 3.1.4.4) (PLD 4) (Choline phosphatase 4) (Phosphatidylcholine-hydrolyzing phospholipase D4).; n=1; Takifugu rubripes Rep: Phospholipase D4 (EC 3.1.4.4) (PLD 4) (Choline phosphatase 4) (Phosphatidylcholine-hydrolyzing phospholipase D4). - Takifugu rubripes<br>Homolog of Fugu rubripes Zygote arrest 1 (Oocyte-specific maternal effect factor).; n=1; Takifugu rubripes Rep: Homolog of Fugu rubripes Zygote arrest 1 (Oocyte-specific maternal effect factor). - Takifugu rubripes |
| 37879 | 3.11 | 0.18 | 0.0004 | 0.0097 | 1.72 | all_v2.0.1466<br>9.C1            |                                                                                                                                                                                                                                                                                                                                                                                                                                                                                                                |
| 46742 | 2.68 | 0.21 | 0.0015 | 0.0200 | 1.72 | all_v2.0.1223<br>7.C1            | Unassigned protein                                                                                                                                                                                                                                                                                                                                                                                                                                                                                             |
| 47985 | 2.65 | 0.25 | 0.0016 | 0.0209 | 1.72 | sb_gmnl1a_00<br>45c07.t7         | Unassigned protein<br>Cytosolic nonspecific dipeptidase; n=3; Percomorpha Rep: Cytosolic nonspecific dipeptidase - Oreochromis niloticus (Nile tilapia) (Tilapia nilotica)                                                                                                                                                                                                                                                                                                                                     |
| 36789 | 3.37 | 0.14 | 0.0002 | 0.0062 | 1.72 | sb_gmnlkfc_0001a07.t7            |                                                                                                                                                                                                                                                                                                                                                                                                                                                                                                                |
| 52097 | 2.39 | 0.27 | 0.0035 | 0.0328 | 1.71 | all_v2.0.1073<br>2.C1            | unclassified<br>PREDICTED: similar to calcium-transporting ATPase; n=1; Monodelphis domestica Rep: PREDICTED: similar to calcium-transporting ATPase - Monodelphis domestica                                                                                                                                                                                                                                                                                                                                   |
| 40281 | 3.39 | 0.15 | 0.0002 | 0.0061 | 1.71 | sb_gmnbhkc_0001g19.pD<br>NRF2    | Proteasome (Prosome, macropain) subunit, alpha type, 6b; n=2; Danio rerio Rep: Proteasome (Prosome, macropain) subunit, alpha type, 6b - Brachydanio rerio (Zebrafish) (Danio rerio)<br>Novel protein similar to vertebrate EF-hand domain family, member D2; n=2; Danio rerio Rep: Novel protein similar to vertebrate EF-hand domain family, member D2 - Danio rerio (Zebrafish) (Brachydanio rerio)                                                                                                         |
| 41403 | 2.42 | 0.22 | 0.0032 | 0.0310 | 1.71 | sb_gmnl5fc_0011p03.t7            | UPI0000E4E275 related cluster; n=1; Danio rerio Rep: UPI0000E4E275 UniRef100 entry - Danio rerio                                                                                                                                                                                                                                                                                                                                                                                                               |
| 39469 | 2.89 | 0.19 | 0.0008 | 0.0138 | 1.71 | all_v2.0.1227<br>6.C1            | Homolog of Carassius auratus Interferon-inducible protein Gig2.; n=4; Takifugu rubripes Rep: Homolog of Carassius auratus Interferon-inducible protein Gig2. - Takifugu rubripes                                                                                                                                                                                                                                                                                                                               |
| 43079 | 3.82 | 0.13 | 0.0001 | 0.0036 | 1.71 | sb_gmapht_0004g05.pDN<br>RF2     | Unassigned protein<br>Fatty acid-binding protein, brain (B-FABP) (Brain lipid-binding protein) (BLBP) (Mammary-derived growth inhibitor related).; n=5; Takifugu rubripes Rep: Fatty acid-binding protein, brain (B-FABP) (Brain lipid-binding protein) (BLBP) (Mammary-derived growth inhibitor related). - Takifugu rubripes                                                                                                                                                                                 |
| 37853 | 3.69 | 0.13 | 0.0001 | 0.0040 | 1.70 | all_v2.0.7494<br>.C1             |                                                                                                                                                                                                                                                                                                                                                                                                                                                                                                                |
| 46967 | 2.65 | 0.23 | 0.0016 | 0.0210 | 1.70 | all_v2.0.2449<br>.C1             | Unassigned protein                                                                                                                                                                                                                                                                                                                                                                                                                                                                                             |
| 37178 | 2.81 | 0.18 | 0.0010 | 0.0162 | 1.69 | all_v2.0.2512<br>.C1             |                                                                                                                                                                                                                                                                                                                                                                                                                                                                                                                |
| 52553 | 2.55 | 0.24 | 0.0022 | 0.0245 | 1.69 | all_v2.0.1015<br>7.C1            | unclassified<br>Homolog of Homo sapiens VPS13B-1A protein; n=1; Takifugu rubripes Rep: Homolog of Homo sapiens VPS13B-1A protein - Takifugu rubripes                                                                                                                                                                                                                                                                                                                                                           |
| 38441 | 3.55 | 0.13 | 0.0002 | 0.0049 | 1.69 | sb_gmnbpcic_0007k03.pD<br>NRm13r | custom - IKKA-like protein                                                                                                                                                                                                                                                                                                                                                                                                                                                                                     |
| 44531 | 3.17 | 0.16 | 0.0004 | 0.0088 | 1.69 | IKKAlklikeS2                     |                                                                                                                                                                                                                                                                                                                                                                                                                                                                                                                |
| 48527 | 2.49 | 0.22 | 0.0026 | 0.0269 | 1.69 | all_v2.0.1407<br>9.C1            | Unassigned protein<br>Reverse transcriptase-like protein; n=1; Takifugu rubripes Rep: Reverse transcriptase-like protein - Fugu rubripes (Japanese pufferfish) (Takifugu rubripes)                                                                                                                                                                                                                                                                                                                             |
| 41821 | 2.51 | 0.25 | 0.0024 | 0.0261 | 1.69 | all_v2.0.2602<br>.C1             | UBX domain-containing protein 8-A; n=4; Xenopus Rep: UBX domain-containing protein 8-A - Xenopus laevis (African clawed frog)<br>Homolog of Homo sapiens Mannosyl (Alpha-1,3-)-glycoprotein beta-1,4-N-acetylglucosaminyltransferase, isoenzyme B,                                                                                                                                                                                                                                                             |
| 42941 | 2.59 | 0.22 | 0.0019 | 0.0228 | 1.69 | all_v2.0.3501<br>.C1             |                                                                                                                                                                                                                                                                                                                                                                                                                                                                                                                |

|       |      |      |        |        |      |                               |                                                                                                                                                                                                                                  |
|-------|------|------|--------|--------|------|-------------------------------|----------------------------------------------------------------------------------------------------------------------------------------------------------------------------------------------------------------------------------|
| 38160 | 3.01 | 0.17 | 0.0006 | 0.0116 | 1.68 | sb_gmnlstfc_0003i11.t7        | Homolog of Homo sapiens Membrane interacting protein of RGS16; n=1; Takifugu rubripes Rep: Homolog of Homo sapiens Membrane interacting protein of RGS16 - Takifugu rubripes                                                     |
| 49047 | 3.70 | 0.12 | 0.0001 | 0.0040 | 1.68 | all_v2.0.1110.8.C4            | unclassified                                                                                                                                                                                                                     |
| 40840 | 4.47 | 0.09 | 0.0000 | 0.0019 | 1.68 | sb_gmnbhkas_0018n05.pD.NRF2   | PREDICTED: similar to poly (ADP-ribose) polymerase family, member 11.; n=1; Monodelphis domestica Rep: PREDICTED: similar to poly (ADP-ribose) polymerase family, member 11, - Monodelphis domestica                             |
| 49642 | 3.30 | 0.16 | 0.0003 | 0.0071 | 1.68 | all_v2.0.7220.C1              | unclassified                                                                                                                                                                                                                     |
| 52706 | 2.75 | 0.20 | 0.0012 | 0.0178 | 1.68 | all_v2.0.1737.1.C1            | unclassified                                                                                                                                                                                                                     |
| 52646 | 2.79 | 0.18 | 0.0011 | 0.0165 | 1.67 | all_v2.0.3726.C1              | unclassified                                                                                                                                                                                                                     |
| 47952 | 3.65 | 0.13 | 0.0001 | 0.0042 | 1.67 | sb_gmnbhkas_0008b05.pD.NRF2   | Unassigned protein                                                                                                                                                                                                               |
| 52340 | 2.80 | 0.21 | 0.0011 | 0.0164 | 1.67 | all_v2.0.3337.C1              | unclassified                                                                                                                                                                                                                     |
| 46741 | 3.10 | 0.17 | 0.0005 | 0.0099 | 1.67 | all_v2.0.5124.C2              | Unassigned protein                                                                                                                                                                                                               |
| 45507 | 3.40 | 0.13 | 0.0002 | 0.0060 | 1.67 | all_v2.0.1349.6.C1            | non-directed                                                                                                                                                                                                                     |
| 38629 | 2.48 | 0.23 | 0.0027 | 0.0274 | 1.67 | sb_gmnlstfc_0014o15.pDN.Rm13r | Interleukin-1 receptor-associated kinase 4 (EC 2.7.11.1) (IRAK-4) (NY- REN-64 antigen).; n=1; Takifugu rubripes Rep: Interleukin-1 receptor-associated kinase 4 (EC 2.7.11.1) (IRAK-4) (NY- REN-64 antigen). - Takifugu rubripes |
| 54894 | 2.62 | 0.21 | 0.0018 | 0.0219 | 1.66 | all_v2.0.2012.C2              | unclassified                                                                                                                                                                                                                     |
| 43170 | 3.39 | 0.14 | 0.0002 | 0.0062 | 1.66 | all_v2.0.3828.C1              | Vacuolar protein-sorting-associated protein 36; n=3; Clupeocephala Rep: Vacuolar protein-sorting-associated protein 36 - Danio rerio (Zebrafish) (Brachydanio rerio)                                                             |
| 37655 | 3.57 | 0.13 | 0.0001 | 0.0047 | 1.66 | sb_gmapov_0006b08.pDN.Rm13r   | Homeobox protein Hox-C13a; n=9; Clupeocephala Rep: Homeobox protein Hox-C13a - Brachydanio rerio (Zebrafish) (Danio rerio)                                                                                                       |
| 51059 | 3.10 | 0.15 | 0.0005 | 0.0099 | 1.66 | all_v2.0.690.C5               | unclassified                                                                                                                                                                                                                     |
| 40089 | 2.97 | 0.17 | 0.0007 | 0.0121 | 1.66 | sb_gmnbmu_0008a12.pDN.RF2     | Polyprotein; n=1; Atlantic salmon swim bladder sarcoma virus Rep: Polyprotein - Atlantic salmon swim bladder sarcoma virus                                                                                                       |
| 49321 | 2.76 | 0.18 | 0.0012 | 0.0176 | 1.66 | all_v2.0.2925.C1              | unclassified                                                                                                                                                                                                                     |
| 39327 | 3.23 | 0.16 | 0.0003 | 0.0079 | 1.66 | all_v2.0.1228.1.C1            | NFX1-type zinc finger-containing protein 1.; n=1; Takifugu rubripes Rep: NFX1-type zinc finger-containing protein 1 - Takifugu rubripes                                                                                          |
| 43609 | 2.81 | 0.20 | 0.0010 | 0.0162 | 1.65 | sb_gmnbmd_0004p22.t7          | Zgc:136585; n=3; Danio rerio Rep: Zgc:136585 - Brachydanio rerio (Zebrafish) (Danio rerio)                                                                                                                                       |
| 52211 | 2.60 | 0.20 | 0.0019 | 0.0225 | 1.65 | all_v2.0.1978.C1              | unclassified                                                                                                                                                                                                                     |
| 44338 | 2.73 | 0.21 | 0.0013 | 0.0184 | 1.65 | sb_gmnlstfc_0011d22.pDN.Rm13r | Borrelia_orfA multi-domain protein                                                                                                                                                                                               |
| 47390 | 2.43 | 0.23 | 0.0031 | 0.0303 | 1.65 | sb_gmnlem_0005d01.t7          | Unassigned protein                                                                                                                                                                                                               |
| 44865 | 2.49 | 0.22 | 0.0026 | 0.0269 | 1.64 | all_v2.0.8362.C1              | HERC5, LOC478474; hect domain and RLD 5                                                                                                                                                                                          |
| 47640 | 2.63 | 0.19 | 0.0017 | 0.0215 | 1.64 | sb_gmnbhkc_0015118.pD.NRm13r  | Unassigned protein                                                                                                                                                                                                               |
| 48591 | 2.48 | 0.20 | 0.0027 | 0.0274 | 1.64 | sb_gmnlem_0025k19.t7          | Unassigned protein                                                                                                                                                                                                               |
| 51581 | 2.64 | 0.19 | 0.0017 | 0.0212 | 1.64 | all_v2.0.1550.6.C1            | unclassified                                                                                                                                                                                                                     |
| 38090 | 3.07 | 0.15 | 0.0005 | 0.0103 | 1.64 | all_v2.0.4946                 | Homolog of Homo sapiens GTPase, IMAP family                                                                                                                                                                                      |

|       |      |      |        |        |      |                                |                                                                                                                                                                                                                                          |
|-------|------|------|--------|--------|------|--------------------------------|------------------------------------------------------------------------------------------------------------------------------------------------------------------------------------------------------------------------------------------|
|       |      |      |        |        |      | .C3                            | member 4; n=1; Takifugu rubripes Rep: Homolog of Homo sapiens GTPase, IMAF family member 4 - Takifugu rubripes                                                                                                                           |
| 55211 | 2.45 | 0.23 | 0.0029 | 0.0290 | 1.64 | all_v2.0.6615.C1               | unclassified                                                                                                                                                                                                                             |
| 47948 | 3.58 | 0.12 | 0.0001 | 0.0047 | 1.64 | all_v2.0.1744.6.C1             | Unassigned protein                                                                                                                                                                                                                       |
| 48556 | 2.93 | 0.16 | 0.0007 | 0.0128 | 1.63 | sb_gmnbrmd_0002p01.pDN Rm13r   | Unassigned protein<br>Repetitive proline-rich cell wall protein 1-related protein; n=7; Trichomonas vaginalis G3 Rep: Repetitive proline-rich cell wall protein 1-related protein - Trichomonas vaginalis G3                             |
| 41734 | 2.42 | 0.23 | 0.0032 | 0.0306 | 1.63 | all_v2.0.6458.C1               | Novel protein similar to vertebrate phosphoribosyl pyrophosphate amidotransferase; n=3; Danio rerio Rep: Novel protein similar to vertebrate phosphoribosyl pyrophosphate amidotransferase - Brachydanio rerio (Zebrafish) (Danio rerio) |
| 39505 | 2.69 | 0.20 | 0.0015 | 0.0196 | 1.63 | sb_gmapov_018109.pDNR F2       | Protein YIPF6; n=4; Danio rerio Rep: Protein YIPF6 - Danio rerio (Zebrafish) (Brachydanio rerio)                                                                                                                                         |
| 41548 | 2.38 | 0.25 | 0.0036 | 0.0330 | 1.63 | all_v2.0.2626.C1               | Novel protein; n=2; Danio rerio Rep: Novel protein - Danio rerio (Zebrafish) (Brachydanio rerio)                                                                                                                                         |
| 39586 | 3.81 | 0.11 | 0.0001 | 0.0036 | 1.63 | all_v2.0.1424.3.C1             |                                                                                                                                                                                                                                          |
| 54420 | 2.66 | 0.18 | 0.0016 | 0.0206 | 1.63 | all_v2.0.8985.C1               | unclassified                                                                                                                                                                                                                             |
| 50069 | 3.62 | 0.12 | 0.0001 | 0.0045 | 1.63 | all_v2.0.1758.2.C1             | unclassified                                                                                                                                                                                                                             |
| 48511 | 3.37 | 0.13 | 0.0002 | 0.0063 | 1.63 | sb_gmlbgits_0004e15.sp6        | Unassigned protein                                                                                                                                                                                                                       |
| 49159 | 2.84 | 0.16 | 0.0009 | 0.0151 | 1.63 | all_v2.0.1635.0.C1             | unclassified                                                                                                                                                                                                                             |
| 50298 | 3.35 | 0.13 | 0.0002 | 0.0066 | 1.62 | all_v2.0.1723.2.C1             | unclassified                                                                                                                                                                                                                             |
| 55152 | 3.24 | 0.13 | 0.0003 | 0.0077 | 1.62 | all_v2.0.5857.C1               | unclassified<br>PREDICTED: similar to intercellular adhesion molecule 5, telencephalin; n=1; Monodelphis domestica Rep: PREDICTED: similar to intercellular adhesion molecule 5, telencephalin - Monodelphis domestica                   |
| 40571 | 2.55 | 0.18 | 0.0022 | 0.0245 | 1.62 | all_v2.0.1957.C1               |                                                                                                                                                                                                                                          |
| 48752 | 2.67 | 0.18 | 0.0016 | 0.0203 | 1.62 | sb_gmnbrbrts_0005o12.pDN Rm13r | Unassigned protein<br>Homolog of Homo sapiens Inter-alpha (globulin) Inh1b1tor H3; n=1; Takifugu rubripes Rep: Homolog of Homo sapiens Inter-alpha (globulin) Inh1b1tor H3 - Takifugu rubripes                                           |
| 38114 | 4.74 | 0.07 | 0.0000 | 0.0018 | 1.61 | all_v2.0.3580.C6               | Novel protein; n=3; Danio rerio Rep: Novel protein - Danio rerio (Zebrafish) (Brachydanio rerio)                                                                                                                                         |
| 39658 | 2.74 | 0.17 | 0.0013 | 0.0181 | 1.61 | all_v2.0.5240.C2               |                                                                                                                                                                                                                                          |
| 46917 | 2.69 | 0.18 | 0.0015 | 0.0197 | 1.61 | sb_gmapht_024c21.pDN RF2       | Unassigned protein                                                                                                                                                                                                                       |
| 44256 | 3.59 | 0.11 | 0.0001 | 0.0046 | 1.61 | all_v2.0.1221.C3               | AIG1 domain containing protein                                                                                                                                                                                                           |
| 50024 | 3.31 | 0.13 | 0.0003 | 0.0070 | 1.61 | all_v2.0.1183.0.C1             | unclassified<br>Novel protein similar to vertebrate angiopoietin family; n=1; Danio rerio Rep: Novel protein similar to vertebrate angiopoietin family - Danio rerio (Zebrafish) (Brachydanio rerio)                                     |
| 39445 | 2.40 | 0.19 | 0.0034 | 0.0318 | 1.61 | all_v2.0.1001.0.C1             | LOC558134 protein; n=2; Danio rerio Rep: LOC558134 protein - Danio rerio (Zebrafish) (Brachydanio rerio)                                                                                                                                 |
| 38832 | 2.48 | 0.19 | 0.0026 | 0.0273 | 1.61 | all_v2.0.1770.1.C1             |                                                                                                                                                                                                                                          |
| 48696 | 3.43 | 0.12 | 0.0002 | 0.0058 | 1.60 | all_v2.0.40.C3                 | Unassigned protein                                                                                                                                                                                                                       |
| 43951 | 4.11 | 0.09 | 0.0001 | 0.0025 | 1.60 | sb_gmnbrpcic                   | Zgc:77292; n=2; Danio rerio Rep: Zgc:77292 -                                                                                                                                                                                             |

|       |      |      |        |        |      |                                           |                                                                                                                                                                                                                                                                                                                                                                                                                                                                                                                                                                                                        |
|-------|------|------|--------|--------|------|-------------------------------------------|--------------------------------------------------------------------------------------------------------------------------------------------------------------------------------------------------------------------------------------------------------------------------------------------------------------------------------------------------------------------------------------------------------------------------------------------------------------------------------------------------------------------------------------------------------------------------------------------------------|
| 43951 | 4.11 | 0.09 | 0.0001 | 0.0025 | 1.60 | sb_gmnbpcic_0010g12.pD<br>NRF2            | Zgc:77292; n=2; Danio rerio Rep: Zgc:77292 - Danio rerio (Zebrafish) (Brachydanio rerio)                                                                                                                                                                                                                                                                                                                                                                                                                                                                                                               |
| 51540 | 2.90 | 0.16 | 0.0008 | 0.0135 | 1.60 | all_v2.0.1557<br>7.C1                     | unclassified                                                                                                                                                                                                                                                                                                                                                                                                                                                                                                                                                                                           |
| 42021 | 2.56 | 0.19 | 0.0021 | 0.0240 | 1.59 | all_v2.0.9962<br>.C1                      | Sdf1a; n=2; Danio rerio Rep: Sdf1a - Danio rerio (Zebrafish) (Brachydanio rerio)                                                                                                                                                                                                                                                                                                                                                                                                                                                                                                                       |
| 43027 | 2.87 | 0.17 | 0.0009 | 0.0142 | 1.59 | sb_gmapht_0004p08.pDN<br>Rm13r            | UPI0000D8C4B2 related cluster; n=2; Danio rerio Rep: UPI0000D8C4B2 UniRef100 entry - Danio rerio<br>PREDICTED: similar to Developmentally regulated GTP binding protein 1; n=1; Danio rerio Rep: PREDICTED: similar to Developmentally regulated GTP binding protein 1 - Danio rerio                                                                                                                                                                                                                                                                                                                   |
| 40401 | 2.80 | 0.16 | 0.0011 | 0.0164 | 1.59 | all_v2.0.9509<br>.C1                      | Beta-glucuronidase precursor; n=1; Sus scrofa Rep: Beta-glucuronidase precursor - Sus scrofa (Pig)                                                                                                                                                                                                                                                                                                                                                                                                                                                                                                     |
| 36150 | 3.12 | 0.13 | 0.0004 | 0.0095 | 1.59 | sb_gmapov_026e24.pDN<br>RF2               | unclassified                                                                                                                                                                                                                                                                                                                                                                                                                                                                                                                                                                                           |
| 50815 | 3.11 | 0.13 | 0.0005 | 0.0097 | 1.59 | all_v2.0.1014<br>8.C1                     | unclassified                                                                                                                                                                                                                                                                                                                                                                                                                                                                                                                                                                                           |
| 46909 | 2.62 | 0.17 | 0.0018 | 0.0218 | 1.58 | all_v2.0.1643<br>1.C1                     | Unassigned protein<br>CASP8 and FADD-like apoptosis regulator precursor (Cellular FLICE-like inhibitory protein) (c-FLIP) (Caspase-eight-related protein) (Casper) (Caspase-like apoptosis regulatory protein) (CLARP) (MACH-related inducer of toxicity) (MRIT) (Caspase homolog) (C; n=1; Takifugu rubripes Rep: CASP8 and FADD-like apoptosis regulator precursor (Cellular FLICE-like inhibitory protein) (c-FLIP) (Caspase-eight-related protein) (Casper) (Caspase-like apoptosis regulatory protein) (CLARP) (MACH-related inducer of toxicity) (MRIT) (Caspase homolog) (C - Takifugu rubripes |
| 36328 | 3.96 | 0.09 | 0.0001 | 0.0029 | 1.58 | all_v2.0.1692<br>6.C1                     | Ripk3; receptor-interacting serine-threonine kinase 3 [EC:2.7.11.1]; K08847 receptor-interacting serine/threonine-protein kinase 3 custom - NFkappaB - nuclear factor kappa-B, subunit 1                                                                                                                                                                                                                                                                                                                                                                                                               |
| 46167 | 2.84 | 0.16 | 0.0010 | 0.0151 | 1.58 | all_v2.0.1089<br>6.C1                     | PREDICTED: similar to Zinc finger protein 319; n=1; Danio rerio Rep: PREDICTED: similar to Zinc finger protein 319 - Danio rerio                                                                                                                                                                                                                                                                                                                                                                                                                                                                       |
| 44580 | 3.30 | 0.12 | 0.0003 | 0.0070 | 1.58 | NFkappaB1<br>sb_gmapov_0002e13.pDN<br>RF2 | Ubiquitin family protein                                                                                                                                                                                                                                                                                                                                                                                                                                                                                                                                                                               |
| 41233 | 2.87 | 0.16 | 0.0009 | 0.0144 | 1.58 | all_v2.0.1056<br>2.C1                     | XL; n=1; Saimiri boliviensis Rep: XL - Saimiri boliviensis (Bolivian squirrel monkey)<br>PREDICTED: similar to mKIAA1931 protein; n=1; Monodelphis domestica Rep: PREDICTED: similar to mKIAA1931 protein - Monodelphis domestica                                                                                                                                                                                                                                                                                                                                                                      |
| 46412 | 2.48 | 0.20 | 0.0027 | 0.0277 | 1.58 | sb_gmapov_0013b17.pDN<br>RF2              | Plasminogen precursor; n=1; Oncorhynchus mykiss Rep: Plasminogen precursor - Oncorhynchus mykiss (Rainbow trout) (Salmo gairdneri)                                                                                                                                                                                                                                                                                                                                                                                                                                                                     |
| 43267 | 2.46 | 0.21 | 0.0028 | 0.0284 | 1.58 | all_v2.0.4387<br>.C1                      | Unassigned protein                                                                                                                                                                                                                                                                                                                                                                                                                                                                                                                                                                                     |
| 40679 | 2.58 | 0.18 | 0.0020 | 0.0232 | 1.58 | all_v2.0.1720<br>1.C1                     | custom - interleukin-1 receptor-associated kinase 4                                                                                                                                                                                                                                                                                                                                                                                                                                                                                                                                                    |
| 40005 | 2.56 | 0.18 | 0.0021 | 0.0241 | 1.57 | all_v2.0.1846<br>4.C1                     | Unassigned protein                                                                                                                                                                                                                                                                                                                                                                                                                                                                                                                                                                                     |
| 46450 | 2.80 | 0.16 | 0.0011 | 0.0164 | 1.57 | IRAK41<br>all_v2.0.5685<br>.C1            | Unassigned protein                                                                                                                                                                                                                                                                                                                                                                                                                                                                                                                                                                                     |
| 44550 | 2.48 | 0.20 | 0.0027 | 0.0277 | 1.56 | all_v2.0.1074<br>5.C1                     | unclassified                                                                                                                                                                                                                                                                                                                                                                                                                                                                                                                                                                                           |
| 47363 | 2.72 | 0.17 | 0.0013 | 0.0187 | 1.56 | all_v2.0.1358<br>1.C1                     | unclassified                                                                                                                                                                                                                                                                                                                                                                                                                                                                                                                                                                                           |
| 53449 | 2.75 | 0.15 | 0.0012 | 0.0177 | 1.56 | sb_gmnbhkas_0017124.pD<br>NRF2            | Unassigned protein                                                                                                                                                                                                                                                                                                                                                                                                                                                                                                                                                                                     |
| 54782 | 3.39 | 0.11 | 0.0002 | 0.0062 | 1.56 | all_v2.0.1843                             |                                                                                                                                                                                                                                                                                                                                                                                                                                                                                                                                                                                                        |
| 48348 | 2.66 | 0.16 | 0.0016 | 0.0207 | 1.56 |                                           |                                                                                                                                                                                                                                                                                                                                                                                                                                                                                                                                                                                                        |



|       |      |      |        |        |      |                              |                                                                                                                                                                                                            |
|-------|------|------|--------|--------|------|------------------------------|------------------------------------------------------------------------------------------------------------------------------------------------------------------------------------------------------------|
| 47408 | 2.46 | 0.17 | 0.0028 | 0.0284 | 1.56 | sb_gmnbhkc_0012e23.pDNRm13r  | Unassigned protein                                                                                                                                                                                         |
| 44015 | 2.94 | 0.13 | 0.0007 | 0.0127 | 1.56 | all_v2.0.11085.C1            | Zgc:86905; n=1; Danio rerio Rep: Zgc:86905 - Danio rerio (Zebrafish) (Brachydanio rerio)                                                                                                                   |
| 49961 | 3.53 | 0.10 | 0.0002 | 0.0051 | 1.56 | all_v2.0.12262.C1            | unclassified                                                                                                                                                                                               |
| 45132 | 2.55 | 0.18 | 0.0022 | 0.0245 | 1.55 | all_v2.0.6091.C1             | LOC519254; similar to ATP-dependent RNA helicase DDX18 (DEAD-box protein 18) (Myc-regulated DEAD-box protein) (MrDb)                                                                                       |
| 47124 | 2.46 | 0.17 | 0.0028 | 0.0283 | 1.55 | sb_gmnbhkc_0014e02.pDNRm13r  | Unassigned protein                                                                                                                                                                                         |
| 54462 | 2.84 | 0.14 | 0.0010 | 0.0152 | 1.55 | all_v2.0.4285.C1             | unclassified                                                                                                                                                                                               |
| 52357 | 2.49 | 0.17 | 0.0026 | 0.0269 | 1.55 | all_v2.0.2097.C1             | unclassified                                                                                                                                                                                               |
| 53074 | 2.63 | 0.18 | 0.0018 | 0.0216 | 1.55 | all_v2.0.10788.C1            | unclassified                                                                                                                                                                                               |
| 41088 | 2.75 | 0.16 | 0.0012 | 0.0177 | 1.55 | all_v2.0.3752.C1             | PREDICTED: similar to transmembrane protein 7; n=1; Equus caballus Rep: PREDICTED: similar to transmembrane protein 7 - Equus caballus                                                                     |
| 49903 | 2.67 | 0.17 | 0.0015 | 0.0202 | 1.55 | all_v2.0.17159.C1            | unclassified                                                                                                                                                                                               |
| 51595 | 2.86 | 0.14 | 0.0009 | 0.0145 | 1.55 | all_v2.0.6499.C1             | unclassified                                                                                                                                                                                               |
| 43496 | 2.75 | 0.16 | 0.0012 | 0.0178 | 1.54 | all_v2.0.13664.C1            | Zgc:112175; n=3; Danio rerio Rep: Zgc:112175 - Danio rerio (Zebrafish) (Brachydanio rerio)                                                                                                                 |
| 53364 | 2.76 | 0.14 | 0.0012 | 0.0175 | 1.54 | all_v2.0.3851.C1             | unclassified                                                                                                                                                                                               |
| 47248 | 2.40 | 0.21 | 0.0034 | 0.0319 | 1.54 | all_v2.0.3503.C1             | Unassigned protein                                                                                                                                                                                         |
| 40503 | 2.54 | 0.18 | 0.0023 | 0.0250 | 1.54 | sb_gmnbmu_0013g03.pDNRm13r   | PREDICTED: similar to gamma-aminobutyric acid (GABA-A) receptor, subunit epsilon; n=1; Homo sapiens Rep: PREDICTED: similar to gamma-aminobutyric acid (GABA-A) receptor, subunit epsilon - Homo sapiens   |
| 39626 | 2.81 | 0.15 | 0.0010 | 0.0160 | 1.54 | all_v2.0.4.CB27              | Novel protein; n=2; Danio rerio Rep: Novel protein - Danio rerio (Zebrafish) (Brachydanio rerio)                                                                                                           |
| 37903 | 2.45 | 0.19 | 0.0029 | 0.0290 | 1.53 | all_v2.0.11951.C1            | Homolog of Gallus gallus Cytochrome P450; n=1; Takifugu rubripes Rep: Homolog of Gallus gallus Cytochrome P450. - Takifugu rubripes                                                                        |
| 49071 | 2.52 | 0.17 | 0.0024 | 0.0258 | 1.53 | all_v2.0.3825.C1             | unclassified                                                                                                                                                                                               |
| 39488 | 2.69 | 0.16 | 0.0014 | 0.0194 | 1.53 | all_v2.0.16790.C1            | Novel protein similar to vertebrate myotubularin related protein 9; n=1; Danio rerio Rep: Novel protein similar to vertebrate myotubularin related protein 9 - Danio rerio (Zebrafish) (Brachydanio rerio) |
| 54137 | 2.66 | 0.15 | 0.0016 | 0.0204 | 1.53 | all_v2.0.17649.C1            | unclassified                                                                                                                                                                                               |
| 54671 | 2.79 | 0.14 | 0.0011 | 0.0164 | 1.53 | all_v2.0.13670.C1            | unclassified                                                                                                                                                                                               |
| 53832 | 3.82 | 0.08 | 0.0001 | 0.0036 | 1.52 | all_v2.0.7066.C3             | unclassified                                                                                                                                                                                               |
| 43476 | 3.03 | 0.13 | 0.0005 | 0.0109 | 1.52 | all_v2.0.11065.C1            | Zgc:111879 protein; n=4; Danio rerio Rep: Zgc:111879 protein - Danio rerio (Zebrafish) (Brachydanio rerio)                                                                                                 |
| 55493 | 2.46 | 0.18 | 0.0029 | 0.0285 | 1.52 | sb_gmnblits_0024n20.pDNRm13r | Zfp184_predicted; zinc finger protein 184 (Kruppel-like) (predicted); K09228 KRAB domain-containing zinc finger protein                                                                                    |
| 45737 | 2.51 | 0.17 | 0.0024 | 0.0261 | 1.52 | all_v2.0.15887.C1.a          | non-directed                                                                                                                                                                                               |
| 42664 | 2.81 | 0.15 | 0.0010 | 0.0160 | 1.52 | sb_gmnlkic_0011d03.pDNRm13r  | Transcription factor; n=8; Clupeocephala Rep: Transcription factor - Danio rerio (Zebrafish) (Brachydanio rerio)                                                                                           |
| 39035 | 3.15 | 0.11 | 0.0004 | 0.0091 | 1.52 | all_v2.0.7743.C1             | MGC85251 protein; n=4; Xenopus Rep: MGC85251 protein - Xenopus laevis (African                                                                                                                             |

|       |      |      |        |        |      |                                |                                                                                                                                                                                                                                                                                                                                                |
|-------|------|------|--------|--------|------|--------------------------------|------------------------------------------------------------------------------------------------------------------------------------------------------------------------------------------------------------------------------------------------------------------------------------------------------------------------------------------------|
|       |      |      |        |        |      |                                | clawed frog)                                                                                                                                                                                                                                                                                                                                   |
| 41492 | 2.91 | 0.12 | 0.0008 | 0.0135 | 1.51 | sb_gmnbgi_004b13.pDN RF2       | Protein MAK10 homolog; n=4; Clupeocephala Rep: Protein MAK10 homolog - Danio rerio (Zebrafish) (Brachydanio rerio)                                                                                                                                                                                                                             |
| 39322 | 2.58 | 0.15 | 0.0020 | 0.0233 | 1.51 | all_v2.0.6027.C1               | NFX1-type zinc finger-containing protein 1.; n=1; Takifugu rubripes Rep: NFX1-type zinc finger-containing protein 1 - Takifugu rubripes                                                                                                                                                                                                        |
| 47515 | 2.84 | 0.13 | 0.0010 | 0.0152 | 1.51 | sb_gmnlem_024e22.t7            | Unassigned protein                                                                                                                                                                                                                                                                                                                             |
| 49801 | 2.64 | 0.15 | 0.0017 | 0.0212 | 1.51 | all_v2.0.5035.C2               | unclassified                                                                                                                                                                                                                                                                                                                                   |
| 45101 | 2.88 | 0.13 | 0.0008 | 0.0139 | 1.51 | all_v2.0.12734.C1              | LOC480945; similar to LINE-1 reverse transcriptase homolog                                                                                                                                                                                                                                                                                     |
| 46953 | 3.04 | 0.12 | 0.0005 | 0.0108 | 1.51 | sb_gmnbhkkic_0007o03.pD NRm13r | Unassigned protein                                                                                                                                                                                                                                                                                                                             |
| 55175 | 2.74 | 0.13 | 0.0013 | 0.0181 | 1.50 | all_v2.0.17454.C1              | unclassified                                                                                                                                                                                                                                                                                                                                   |
| 45411 | 3.06 | 0.11 | 0.0005 | 0.0105 | 1.50 | sb_gmnlkfic_0003g13.t7         | MGC127071; similar to eukaryotic translation initiation factor 3, subunit 12                                                                                                                                                                                                                                                                   |
| 49465 | 2.88 | 0.13 | 0.0009 | 0.0141 | 1.50 | all_v2.0.16061.C1              | unclassified                                                                                                                                                                                                                                                                                                                                   |
| 35834 | 3.27 | 0.10 | 0.0003 | 0.0073 | 1.50 | all_v2.0.14969.C1              | Alanine-glyoxylate aminotransferase; n=3; Danio rerio Rep: Alanine-glyoxylate aminotransferase - Danio rerio (Zebrafish) (Brachydanio rerio)                                                                                                                                                                                                   |
| 48267 | 2.40 | 0.18 | 0.0034 | 0.0320 | 1.50 | sb_gmlbgits_0004d03.sp6        | Unassigned protein                                                                                                                                                                                                                                                                                                                             |
| 49860 | 3.01 | 0.12 | 0.0006 | 0.0116 | 1.50 | all_v2.0.5197.C1               | unclassified                                                                                                                                                                                                                                                                                                                                   |
| 49538 | 2.45 | 0.18 | 0.0029 | 0.0288 | 1.50 | all_v2.0.17441.C1              | unclassified                                                                                                                                                                                                                                                                                                                                   |
| 47110 | 2.62 | 0.14 | 0.0018 | 0.0218 | 1.50 | sb_gmnbhkkic_0016l15.pD NRF2   | Unassigned protein                                                                                                                                                                                                                                                                                                                             |
| 52470 | 3.45 | 0.09 | 0.0002 | 0.0056 | 1.49 | all_v2.0.6174.C1               | unclassified                                                                                                                                                                                                                                                                                                                                   |
| 35864 | 2.98 | 0.12 | 0.0006 | 0.0120 | 1.49 | all_v2.0.6990.C1               | Alpha-1,2-mannosyltransferase ALG9 (EC 2.4.1.-) (Asparagine-linked glycosylation protein 9 homolog) (Disrupted in bipolar disorder protein 1).; n=1; Takifugu rubripes Rep: Alpha-1,2-mannosyltransferase ALG9 (EC 2.4.1.-) (Asparagine-linked glycosylation protein 9 homolog) (Disrupted in bipolar disorder protein 1). - Takifugu rubripes |
| 52914 | 3.07 | 0.11 | 0.0005 | 0.0102 | 1.49 | all_v2.0.9711.C1               | unclassified                                                                                                                                                                                                                                                                                                                                   |
| 50112 | 3.23 | 0.10 | 0.0003 | 0.0079 | 1.49 | all_v2.0.1796.C1               | unclassified                                                                                                                                                                                                                                                                                                                                   |
| 50189 | 2.50 | 0.15 | 0.0025 | 0.0264 | 1.49 | all_v2.0.6434.C1               | unclassified                                                                                                                                                                                                                                                                                                                                   |
| 41888 | 2.54 | 0.15 | 0.0022 | 0.0248 | 1.49 | all_v2.0.6878.C2               | Ribosomal protein L22; n=4; Percomorpha Rep: Ribosomal protein L22 - Solea senegalensis (Sole) custom - caspase 8, apoptosis-related cysteine peptidase                                                                                                                                                                                        |
| 44434 | 2.57 | 0.14 | 0.0021 | 0.0237 | 1.48 | CASP82                         |                                                                                                                                                                                                                                                                                                                                                |
| 48227 | 2.50 | 0.15 | 0.0025 | 0.0264 | 1.48 | all_v2.0.17837.C1              | Unassigned protein                                                                                                                                                                                                                                                                                                                             |
| 39349 | 2.50 | 0.14 | 0.0025 | 0.0267 | 1.48 | all_v2.0.3973.C3               | N-myc-interactor (Nmi) (N-myc and STAT interactor).; n=1; Takifugu rubripes Rep: N-myc-interactor (Nmi) (N-myc and STAT interactor). - Takifugu rubripes                                                                                                                                                                                       |
| 50525 | 2.88 | 0.12 | 0.0009 | 0.0141 | 1.48 | all_v2.0.832.C1                | unclassified                                                                                                                                                                                                                                                                                                                                   |
| 49408 | 2.64 | 0.14 | 0.0017 | 0.0212 | 1.48 | all_v2.0.12168.C3              | unclassified                                                                                                                                                                                                                                                                                                                                   |
| 35804 | 2.60 | 0.15 | 0.0019 | 0.0224 | 1.48 | sb_gmnlem_0013c12.t7           | ADP/ATP translocase-like protein; n=3; Arabidopsis thaliana Rep: ADP/ATP translocase-like protein - Arabidopsis thaliana (Mouse-ear cress)                                                                                                                                                                                                     |
| 48403 | 3.07 | 0.11 | 0.0005 | 0.0102 | 1.48 | sb_gmnlla_00                   | Unassigned protein                                                                                                                                                                                                                                                                                                                             |

|       |      |      |        |        |      |                              |                                                                                                                                                                                                                                                                          |
|-------|------|------|--------|--------|------|------------------------------|--------------------------------------------------------------------------------------------------------------------------------------------------------------------------------------------------------------------------------------------------------------------------|
| 48403 | 3.07 | 0.11 | 0.0005 | 0.0102 | 1.48 | sb_gmnl1a_0048g04.t7         | Unassigned protein                                                                                                                                                                                                                                                       |
| 45447 | 2.64 | 0.14 | 0.0017 | 0.0212 | 1.48 | all_v2.0.858.C1              | MPPN domain containing protein                                                                                                                                                                                                                                           |
| 46466 | 2.49 | 0.16 | 0.0026 | 0.0269 | 1.48 | all_v2.0.6161.C1             | Unassigned protein                                                                                                                                                                                                                                                       |
| 42177 | 2.38 | 0.17 | 0.0036 | 0.0329 | 1.48 | all_v2.0.13203.C1            | Si:dkey-24p1.1; n=3; Danio rerio Rep: Si:dkey-24p1.1 - Danio rerio (Zebrafish) (Brachydanio rerio)                                                                                                                                                                       |
| 54746 | 2.40 | 0.16 | 0.0034 | 0.0321 | 1.48 | all_v2.0.12292.C1            | unclassified<br>Putative ATP-dependent RNA helicase DHX33 (EC 3.6.1.-) (DEAH box protein 33).; n=1; Takifugu rubripes Rep: Putative ATP-dependent RNA helicase DHX33 (EC 3.6.1.-) (DEAH box protein 33). - Takifugu rubripes                                             |
| 41613 | 2.39 | 0.17 | 0.0035 | 0.0322 | 1.47 | sb_gmnbspic_0003h16.pDNRF2   | unclassified                                                                                                                                                                                                                                                             |
| 53174 | 2.50 | 0.15 | 0.0025 | 0.0266 | 1.47 | all_v2.0.4725.C1             | unclassified                                                                                                                                                                                                                                                             |
| 53439 | 2.40 | 0.15 | 0.0034 | 0.0320 | 1.47 | all_v2.0.6014.C1             | unclassified<br>Cell division control protein 42 homolog precursor (G25K GTP-binding protein).; n=1; Takifugu rubripes Rep: Cell division control protein 42 homolog precursor (G25K GTP-binding protein). - Takifugu rubripes                                           |
| 36422 | 2.67 | 0.13 | 0.0015 | 0.0200 | 1.47 | all_v2.0.13040.C1            | Pentraxin precursor; n=1; Salmo salar Rep: Pentraxin precursor - Salmo salar (Atlantic salmon)                                                                                                                                                                           |
| 39878 | 2.63 | 0.13 | 0.0017 | 0.0215 | 1.46 | all_v2.0.17977.C1            | Novel protein similar to vertebrate apolipoprotein B (Including Ag(X) antigen); n=3; Danio rerio Rep: Novel protein similar to vertebrate apolipoprotein B (Including Ag(X) antigen) - Danio rerio (Zebrafish) (Brachydanio rerio)                                       |
| 39449 | 2.72 | 0.12 | 0.0013 | 0.0187 | 1.46 | all_v2.0.18269.C1            | Zgc:158229; n=2; Danio rerio Rep: Zgc:158229 - Danio rerio (Zebrafish) (Brachydanio rerio)                                                                                                                                                                               |
| 43738 | 2.72 | 0.12 | 0.0013 | 0.0187 | 1.46 | sb_gmnlskic_0013e11.pDNRm13r | Unassigned protein                                                                                                                                                                                                                                                       |
| 47677 | 2.58 | 0.13 | 0.0020 | 0.0233 | 1.46 | sb_gmnbhkic_0004122.pDNRF2   | unclassified                                                                                                                                                                                                                                                             |
| 51542 | 2.38 | 0.15 | 0.0035 | 0.0329 | 1.46 | all_v2.0.6459.C1             | custom - caspase 8, apoptosis-related cysteine peptidase                                                                                                                                                                                                                 |
| 44439 | 2.57 | 0.14 | 0.0020 | 0.0237 | 1.45 | CASP85                       | Unassigned protein                                                                                                                                                                                                                                                       |
| 47982 | 2.57 | 0.13 | 0.0020 | 0.0237 | 1.45 | sb_gmapht_0015h06.pDNRF2     | unclassified                                                                                                                                                                                                                                                             |
| 55051 | 2.46 | 0.14 | 0.0028 | 0.0284 | 1.45 | all_v2.0.9309.C1             | unclassified                                                                                                                                                                                                                                                             |
| 49076 | 2.92 | 0.11 | 0.0008 | 0.0133 | 1.45 | all_v2.0.12705.C1            | unclassified                                                                                                                                                                                                                                                             |
| 36676 | 2.50 | 0.14 | 0.0025 | 0.0267 | 1.45 | all_v2.0.3061.C1             | crumbs homolog 3a; n=1; Danio rerio Rep: crumbs homolog 3a - Danio rerio<br>Centromere protein T (CENP-T) (Interphase centromere complex protein 22).; n=2; Gallus gallus Rep: Centromere protein T (CENP-T) (Interphase centromere complex protein 22). - Gallus gallus |
| 36451 | 2.57 | 0.14 | 0.0021 | 0.0237 | 1.45 | all_v2.0.18657.C1            | Sorting nexin 10; n=2; Takifugu rubripes Rep: Sorting nexin 10 - Fugu rubripes (Japanese pufferfish) (Takifugu rubripes)                                                                                                                                                 |
| 42324 | 3.08 | 0.09 | 0.0005 | 0.0101 | 1.45 | all_v2.0.1037.C1             | Nuclear cap binding protein subunit 2; n=4; Clupeocephala Rep: Nuclear cap binding protein subunit 2 - Danio rerio (Zebrafish) (Brachydanio rerio)                                                                                                                       |
| 39731 | 2.86 | 0.11 | 0.0009 | 0.0146 | 1.44 | all_v2.0.7197.C1             | Myosin light chain 3; n=1; Theragra chalcogramma Rep: Myosin light chain 3 - Theragra chalcogramma (Alaska pollock)                                                                                                                                                      |
| 39219 | 2.62 | 0.12 | 0.0018 | 0.0216 | 1.44 | sb_gmnlmfta_0004d02.t7       | phospholipase C delta 3; n=1; Takifugu rubripes Rep: phospholipase C delta 3 - Takifugu rubripes                                                                                                                                                                         |
| 39071 | 2.84 | 0.11 | 0.0009 | 0.0151 | 1.44 | all_v2.0.10807.C1            |                                                                                                                                                                                                                                                                          |

|       |      |      |        |        |      |                          |                                                                                                                                                                                                                                                                                                                                                                  |
|-------|------|------|--------|--------|------|--------------------------|------------------------------------------------------------------------------------------------------------------------------------------------------------------------------------------------------------------------------------------------------------------------------------------------------------------------------------------------------------------|
| 46836 | 2.50 | 0.14 | 0.0025 | 0.0267 | 1.44 | sb_gmnl1a_0031d20.t7     | Unassigned protein                                                                                                                                                                                                                                                                                                                                               |
|       |      |      |        |        |      |                          | NADH dehydrogenase 1 alpha; n=1; Psetta maxima Rep: NADH dehydrogenase 1 alpha - Scophthalmus maximus (Turbot)                                                                                                                                                                                                                                                   |
| 39266 | 2.38 | 0.14 | 0.0036 | 0.0331 | 1.44 | all_v2.0.1166.C1         |                                                                                                                                                                                                                                                                                                                                                                  |
| 51622 | 2.63 | 0.12 | 0.0017 | 0.0215 | 1.43 | all_v2.0.1321.2.C1       | unclassified                                                                                                                                                                                                                                                                                                                                                     |
| 52038 | 2.53 | 0.13 | 0.0023 | 0.0251 | 1.43 | all_v2.0.1756.0.C1       | unclassified                                                                                                                                                                                                                                                                                                                                                     |
|       |      |      |        |        |      |                          | Zgc:162641 protein; n=3; Danio rerio Rep: Zgc:162641 protein - Danio rerio (Zebrafish) (Brachydanio rerio)                                                                                                                                                                                                                                                       |
| 43788 | 2.64 | 0.12 | 0.0017 | 0.0212 | 1.43 | all_v2.0.1105.6.C1       |                                                                                                                                                                                                                                                                                                                                                                  |
| 55134 | 2.86 | 0.11 | 0.0009 | 0.0145 | 1.43 | all_v2.0.392.C2          | unclassified                                                                                                                                                                                                                                                                                                                                                     |
| 51980 | 3.15 | 0.09 | 0.0004 | 0.0090 | 1.43 | all_v2.0.703.C1          | unclassified                                                                                                                                                                                                                                                                                                                                                     |
|       |      |      |        |        |      |                          | GTP-binding nuclear protein Ran; n=35; Euteleostomi Rep: GTP-binding nuclear protein Ran - Homo sapiens (Human)                                                                                                                                                                                                                                                  |
| 37498 | 2.90 | 0.10 | 0.0008 | 0.0136 | 1.43 | all_v2.0.3198.C3         |                                                                                                                                                                                                                                                                                                                                                                  |
|       |      |      |        |        |      |                          | Bcl-2-related ovarian killer protein homolog B; n=3; Danio rerio Rep: Bcl-2-related ovarian killer protein homolog B - Danio rerio (Zebrafish) (Brachydanio rerio)                                                                                                                                                                                               |
| 36122 | 2.41 | 0.14 | 0.0033 | 0.0314 | 1.43 | all_v2.0.4102.C1         |                                                                                                                                                                                                                                                                                                                                                                  |
|       |      |      |        |        |      |                          | Alkylated repair protein alkB homolog 5.; n=2; Gallus gallus Rep: Alkylated repair protein alkB homolog 5 - Gallus gallus                                                                                                                                                                                                                                        |
| 35854 | 2.52 | 0.13 | 0.0024 | 0.0259 | 1.43 | all_v2.0.1645.C1         | PREDICTED: similar to cGMP phosphodiesterase A2; n=1; Ornithorhynchus anatinus Rep: PREDICTED: similar to cGMP phosphodiesterase A2 - Ornithorhynchus anatinus                                                                                                                                                                                                   |
| 40337 | 2.69 | 0.11 | 0.0014 | 0.0194 | 1.42 | sb_gmnlbric_0003k18.t7   |                                                                                                                                                                                                                                                                                                                                                                  |
| 50893 | 2.52 | 0.13 | 0.0024 | 0.0259 | 1.42 | all_v2.0.1794.C1         | unclassified                                                                                                                                                                                                                                                                                                                                                     |
| 52806 | 2.48 | 0.12 | 0.0027 | 0.0277 | 1.42 | all_v2.0.3338.C1         | unclassified                                                                                                                                                                                                                                                                                                                                                     |
| 46261 | 2.54 | 0.13 | 0.0022 | 0.0248 | 1.42 | all_v2.0.1036.0.C1       | si:rp71-45k5.3; si:rp71-45k5.3                                                                                                                                                                                                                                                                                                                                   |
|       |      |      |        |        |      |                          | Survival motor neuron domain containing 1; n=1; Danio rerio Rep: Survival motor neuron domain containing 1 - Brachydanio rerio (Zebrafish) (Danio rerio)                                                                                                                                                                                                         |
| 42425 | 2.40 | 0.14 | 0.0034 | 0.0320 | 1.42 | sb_gmnlkfic_0004n14.t7   |                                                                                                                                                                                                                                                                                                                                                                  |
|       |      |      |        |        |      |                          | Homolog of Homo sapiens Proprotein convertase subtilisin/kexin type 5 precursor; n=1; Takifugu rubripes Rep: Homolog of Homo sapiens Proprotein convertase subtilisin/kexin type 5 precursor - Takifugu rubripes                                                                                                                                                 |
| 38293 | 3.65 | 0.06 | 0.0001 | 0.0042 | 1.42 | all_v2.0.1553.2.C1       |                                                                                                                                                                                                                                                                                                                                                                  |
| 52528 | 2.55 | 0.12 | 0.0022 | 0.0246 | 1.41 | all_v2.0.1565.1.C1       | unclassified                                                                                                                                                                                                                                                                                                                                                     |
|       |      |      |        |        |      |                          | PREDICTED: similar to Importin alpha-1 subunit (Karyopherin alpha-1 subunit) (SRP1-beta) (RAG cohort protein 2) (Nucleoprotein interactor 1) (NPI-1), partial; n=1; Danio rerio Rep: PREDICTED: similar to Importin alpha-1 subunit (Karyopherin alpha-1 subunit) (SRP1-beta) (RAG cohort protein 2) (Nucleoprotein interactor 1) (NPI-1), partial - Danio rerio |
| 40559 | 2.72 | 0.11 | 0.0013 | 0.0187 | 1.41 | sb_gmapht_017j13.pDNR.F2 |                                                                                                                                                                                                                                                                                                                                                                  |
| 50493 | 3.17 | 0.08 | 0.0004 | 0.0088 | 1.41 | all_v2.0.7812.C1         | unclassified                                                                                                                                                                                                                                                                                                                                                     |
| 36675 | 2.49 | 0.13 | 0.0026 | 0.0268 | 1.41 | sb_gmapov_024k13.pDN.RF2 | CRSP complex subunit 6; n=14; Amniota Rep: CRSP complex subunit 6 - Homo sapiens (Human)                                                                                                                                                                                                                                                                         |
| 44649 | 2.99 | 0.09 | 0.0006 | 0.0120 | 1.41 | all_v2.0.661.C6          | DKEY-218F9.5, LOC571141; novel protein similar to bloodthirsty (bty)                                                                                                                                                                                                                                                                                             |
| 44066 | 2.74 | 0.10 | 0.0013 | 0.0180 | 1.41 | all_v2.0.7765.C1         | Zgc:92254; n=2; Danio rerio Rep: Zgc:92254 - Danio rerio (Zebrafish) (Brachydanio rerio)                                                                                                                                                                                                                                                                         |
| 55284 | 3.01 | 0.09 | 0.0006 | 0.0116 | 1.40 | all_v2.0.2423.C1         | unclassified                                                                                                                                                                                                                                                                                                                                                     |
|       |      |      |        |        |      |                          | LOC477822; similar to hyaluronan binding protein 2 [EC:3.4.21.-]; K08648 hyaluronan binding protein 2                                                                                                                                                                                                                                                            |
| 45088 | 3.16 | 0.07 | 0.0004 | 0.0090 | 1.40 | sb_gmnlkric_0002a08.t7   |                                                                                                                                                                                                                                                                                                                                                                  |

|       |      |      |        |        |      |                                               |                                                                                                                                                                                                                                                                                                                                                                                                                                                                                                                                                                        |
|-------|------|------|--------|--------|------|-----------------------------------------------|------------------------------------------------------------------------------------------------------------------------------------------------------------------------------------------------------------------------------------------------------------------------------------------------------------------------------------------------------------------------------------------------------------------------------------------------------------------------------------------------------------------------------------------------------------------------|
| 54293 | 3.21 | 0.07 | 0.0003 | 0.0081 | 1.40 | all_v2.0.5441<br>.C1                          | unclassified                                                                                                                                                                                                                                                                                                                                                                                                                                                                                                                                                           |
| 39077 | 2.81 | 0.09 | 0.0010 | 0.0162 | 1.39 | all_v2.0.431.<br>C7                           | Microtubule aggregate protein homolog; n=1;<br>Perca flavescens Rep: Microtubule aggregate<br>protein homolog - Perca flavescens (Yellow perch)                                                                                                                                                                                                                                                                                                                                                                                                                        |
| 47382 | 2.54 | 0.11 | 0.0023 | 0.0249 | 1.39 | sb_gmapht_0<br>030g24.pDN<br>RF2              | Unassigned protein                                                                                                                                                                                                                                                                                                                                                                                                                                                                                                                                                     |
| 51078 | 2.90 | 0.09 | 0.0008 | 0.0135 | 1.39 | all_v2.0.2037<br>.C3                          | unclassified                                                                                                                                                                                                                                                                                                                                                                                                                                                                                                                                                           |
| 44931 | 2.57 | 0.11 | 0.0021 | 0.0237 | 1.39 | all_v2.0.1124<br>3.C1                         | I-set domain containing protein                                                                                                                                                                                                                                                                                                                                                                                                                                                                                                                                        |
| 42023 | 2.54 | 0.10 | 0.0023 | 0.0250 | 1.38 | sb_gmapov_0<br>025i02.pDNR<br>F2              | SEC13 homolog; n=5; Clupeocephala Rep: SEC13<br>homolog - Brachydanio rerio (Zebrafish) (Danio<br>rerio)                                                                                                                                                                                                                                                                                                                                                                                                                                                               |
| 38263 | 2.47 | 0.11 | 0.0028 | 0.0280 | 1.38 | all_v2.0.1048<br>4.C1                         | Homolog of Homo sapiens Placenta-specific gene<br>8 protein; n=1; Takifugu rubripes Rep: Homolog<br>of Homo sapiens Placenta-specific gene 8 protein -<br>Takifugu rubripes                                                                                                                                                                                                                                                                                                                                                                                            |
| 47516 | 3.20 | 0.07 | 0.0003 | 0.0082 | 1.38 | all_v2.0.5207<br>.C1                          | Unassigned protein                                                                                                                                                                                                                                                                                                                                                                                                                                                                                                                                                     |
| 53247 | 2.75 | 0.09 | 0.0012 | 0.0177 | 1.38 | all_v2.0.1141<br>.C1                          | unclassified                                                                                                                                                                                                                                                                                                                                                                                                                                                                                                                                                           |
| 48825 | 2.74 | 0.09 | 0.0013 | 0.0180 | 1.38 | sb_gmnl1a_00<br>04a24.t7                      | Unassigned protein                                                                                                                                                                                                                                                                                                                                                                                                                                                                                                                                                     |
| 35985 | 2.99 | 0.08 | 0.0006 | 0.0119 | 1.38 | all_v2.0.1783<br>4.C1                         | Armadillo repeat protein deleted in velo-cardio-<br>facial syndrome.; n=1; Takifugu rubripes Rep:<br>Armadillo repeat protein deleted in velo-cardio-<br>facial syndrome. - Takifugu rubripes                                                                                                                                                                                                                                                                                                                                                                          |
| 39321 | 2.43 | 0.12 | 0.0031 | 0.0301 | 1.38 | all_v2.0.6027<br>.C5                          | NFX1-type zinc finger-containing protein 1.; n=1;<br>Takifugu rubripes Rep: NFX1-type zinc finger-<br>containing protein 1 - Takifugu rubripes<br>1-phosphatidylinositol-4,5-bisphosphate<br>phosphodiesterase gamma 2 (EC 3.1.4.11)<br>(Phosphoinositide phospholipase C) (PLC-gamma-<br>2) (Phospholipase C-gamma-2) (PLC-IV).; n=1;<br>Takifugu rubripes Rep: 1-phosphatidylinositol-4,5-<br>bisphosphate phosphodiesterase gamma 2 (EC<br>3.1.4.11) (Phosphoinositide phospholipase C)<br>(PLC-gamma-2) (Phospholipase C-gamma-2)<br>(PLC-IV). - Takifugu rubripes |
| 35556 | 2.61 | 0.10 | 0.0018 | 0.0220 | 1.38 | sb_gmnbspic<br>_0013g06.pD<br>NRF2            |                                                                                                                                                                                                                                                                                                                                                                                                                                                                                                                                                                        |
| 49764 | 2.41 | 0.10 | 0.0033 | 0.0312 | 1.37 | all_v2.0.1447<br>.C1                          | unclassified                                                                                                                                                                                                                                                                                                                                                                                                                                                                                                                                                           |
| 48148 | 2.48 | 0.10 | 0.0027 | 0.0275 | 1.37 | sb_gmnlbric_<br>0007c23.t7                    | Unassigned protein                                                                                                                                                                                                                                                                                                                                                                                                                                                                                                                                                     |
| 53784 | 2.61 | 0.09 | 0.0019 | 0.0223 | 1.36 | all_v2.0.124.<br>C1                           | unclassified                                                                                                                                                                                                                                                                                                                                                                                                                                                                                                                                                           |
| 51902 | 2.79 | 0.08 | 0.0011 | 0.0165 | 1.36 | all_v2.0.1162<br>1.C1                         | unclassified                                                                                                                                                                                                                                                                                                                                                                                                                                                                                                                                                           |
| 37024 | 2.71 | 0.08 | 0.0014 | 0.0188 | 1.36 | sb_gmnl1rta_<br>0004d06.t7                    | Embryonic alpha-type globin; n=1; Oncorhynchus<br>mykiss Rep: Embryonic alpha-type globin -<br>Oncorhynchus mykiss (Rainbow trout) (Salmo<br>gairdneri)                                                                                                                                                                                                                                                                                                                                                                                                                |
| 49834 | 3.08 | 0.06 | 0.0005 | 0.0100 | 1.35 | all_v2.0.1278<br>8.C1                         | unclassified                                                                                                                                                                                                                                                                                                                                                                                                                                                                                                                                                           |
| 50913 | 2.50 | 0.09 | 0.0025 | 0.0267 | 1.35 | all_v2.0.3093<br>.C1                          | unclassified                                                                                                                                                                                                                                                                                                                                                                                                                                                                                                                                                           |
| 46509 | 2.42 | 0.10 | 0.0032 | 0.0306 | 1.35 | sb_gmnbhkc<br>_0006d08.pD<br>NRF2             | Unassigned protein                                                                                                                                                                                                                                                                                                                                                                                                                                                                                                                                                     |
| 48700 | 2.55 | 0.09 | 0.0022 | 0.0246 | 1.34 | sb_gmnbhkc<br>_0016p03.pD<br>NRm13r           | Unassigned protein                                                                                                                                                                                                                                                                                                                                                                                                                                                                                                                                                     |
| 44431 | 2.72 | 0.07 | 0.0013 | 0.0187 | 1.33 | CASP106<br>sb_gmnbspic<br>_0005h18.pD<br>NRF2 | custom - caspase 10, apoptosis-related cysteine<br>peptidase                                                                                                                                                                                                                                                                                                                                                                                                                                                                                                           |
| 49004 | 2.39 | 0.09 | 0.0035 | 0.0323 | 1.33 | NRF2                                          | Unassigned protein                                                                                                                                                                                                                                                                                                                                                                                                                                                                                                                                                     |
| 44606 | 2.45 | 0.09 | 0.0029 | 0.0290 | 1.32 | Stoll_like_rec                                | custom - toll-like receptor 3 (TLR3)                                                                                                                                                                                                                                                                                                                                                                                                                                                                                                                                   |

|       |       |      |        |        |      |                                |                                                                                                                                                                                             |
|-------|-------|------|--------|--------|------|--------------------------------|---------------------------------------------------------------------------------------------------------------------------------------------------------------------------------------------|
| 44606 | 2.45  | 0.09 | 0.0029 | 0.0290 | 1.32 | Stoll_like_receptor_3          | custom - toll-like receptor 3 (TLR3)                                                                                                                                                        |
| 37561 | 2.45  | 0.09 | 0.0029 | 0.0291 | 1.32 | sb_gmnbbbr_004n04.pDN<br>Rm13r | Heat shock protein 9; n=5; Clupeocephala Rep: Heat shock protein 9 - Brachydanio reio (Zebrafish) (Danio reio)                                                                              |
| 39587 | 2.48  | 0.08 | 0.0027 | 0.0274 | 1.31 | all_v2.0.5876.C1               | Novel protein; n=2; Danio reio Rep: Novel protein - Danio reio (Zebrafish) (Brachydanio reio)                                                                                               |
| 49818 | 2.55  | 0.07 | 0.0022 | 0.0246 | 1.30 | all_v2.0.3977.C1               | unclassified                                                                                                                                                                                |
| 50205 | 2.56  | 0.07 | 0.0021 | 0.0240 | 1.30 | all_v2.0.9219.C1               | unclassified                                                                                                                                                                                |
| 38379 | 2.68  | 0.05 | 0.0015 | 0.0197 | 1.28 | all_v2.0.3343.C1               | Homolog of Homo sapiens TiTin isoform novex-2; n=1; Takifugu rubripes Rep: Homolog of Homo sapiens TiTin isoform novex-2 - Takifugu rubripes                                                |
| 46732 | 2.45  | 0.06 | 0.0029 | 0.0290 | 1.28 | sb_gmnlem_0027j18.t7           | Unassigned protein                                                                                                                                                                          |
| 39664 | 2.45  | 0.03 | 0.0030 | 0.0293 | 1.20 | all_v2.0.3408.C1               | Novel protein; n=3; Danio reio Rep: Novel protein - Danio reio (Zebrafish) (Brachydanio reio)                                                                                               |
| 44125 | -3.28 | 0.06 | 0.0003 | 0.0072 | 0.72 | all_v2.0.11869.C2              | Zinc finger CCHC-type and RNA-binding motif-containing protein 1; n=2; Xenopus Rep: Zinc finger CCHC-type and RNA-binding motif-containing protein 1 - Xenopus laevis (African clawed frog) |
| 52833 | -3.78 | 0.05 | 0.0001 | 0.0037 | 0.72 | all_v2.0.4044.C2               | unclassified                                                                                                                                                                                |
| 46639 | -3.29 | 0.08 | 0.0003 | 0.0071 | 0.70 | sb_gmnl1a_0005b20.t7           | Unassigned protein                                                                                                                                                                          |
| 47851 | -3.35 | 0.08 | 0.0002 | 0.0065 | 0.70 | all_v2.0.12891.C1              | Unassigned protein                                                                                                                                                                          |
| 42385 | -3.75 | 0.08 | 0.0001 | 0.0038 | 0.66 | all_v2.0.1135.C1               | Stathmin; n=2; Percomorpha Rep: Stathmin - Tetraodon nigroviridis (Green puffer)                                                                                                            |
| 46891 | -3.27 | 0.11 | 0.0003 | 0.0074 | 0.65 | sb_gmapov_0009k19.pDN<br>Rm13r | Unassigned protein                                                                                                                                                                          |
| 51867 | -4.15 | 0.08 | 0.0001 | 0.0025 | 0.64 | all_v2.0.4395.C1               | unclassified                                                                                                                                                                                |
| 46395 | -3.27 | 0.12 | 0.0003 | 0.0074 | 0.64 | sb_gmnbm_0007h07.pDN<br>Rm13r  | TT_ORF1 multi-domain protein                                                                                                                                                                |
| 43634 | -3.38 | 0.12 | 0.0002 | 0.0062 | 0.64 | all_v2.0.13742.C1              | Zgc:152897; n=3; Danio reio Rep: Zgc:152897 - Danio reio (Zebrafish) (Brachydanio reio)                                                                                                     |
| 45113 | -4.67 | 0.07 | 0.0000 | 0.0018 | 0.63 | sb_gmapov_0018o17.pDN<br>RF2   | LOC488397; similar to Methyltransferase-like protein 2                                                                                                                                      |
| 40487 | -4.32 | 0.08 | 0.0000 | 0.0021 | 0.62 | sb_gmapte_0012e12.pDN<br>RF2   | PREDICTED: similar to G protein-coupled receptor 142; n=1; Ornithorhynchus anatinus Rep: PREDICTED: similar to G protein-coupled receptor 142 - Ornithorhynchus anatinus                    |
| 45017 | -3.34 | 0.12 | 0.0002 | 0.0066 | 0.62 | sb_gmnlbric_0004p23.t7         | LOC100022136; similar to Dedicator of cytokinesis protein 10 (Zizimin-3)                                                                                                                    |
| 44380 | -3.66 | 0.12 | 0.0001 | 0.0042 | 0.61 | sb_gmapte_0004f14.pDNR<br>m13r | CDC10; cell division cycle 10                                                                                                                                                               |
| 54441 | -3.70 | 0.12 | 0.0001 | 0.0040 | 0.61 | all_v2.0.10503.C1              | unclassified                                                                                                                                                                                |
| 38516 | -4.10 | 0.11 | 0.0001 | 0.0025 | 0.59 | all_v2.0.14475.C1              | Hsp90 co-chaperone Cdc37; n=3; Tetradontidae Rep: Hsp90 co-chaperone Cdc37 - Tetraodon fluviatilis (Puffer fish)                                                                            |
| 50398 | -3.36 | 0.15 | 0.0002 | 0.0063 | 0.58 | all_v2.0.3774.C1               | unclassified                                                                                                                                                                                |
| 47293 | -3.38 | 0.16 | 0.0002 | 0.0062 | 0.58 | all_v2.0.8868.C1               | Unassigned protein                                                                                                                                                                          |
| 36157 | -3.44 | 0.15 | 0.0002 | 0.0057 | 0.58 | all_v2.0.10467.C2              | Betaine--homocysteine S-methyltransferase 1; n=3; Danio reio Rep: Betaine--homocysteine S-methyltransferase 1 - Danio reio (Zebrafish) (Brachydanio reio)                                   |
| 44122 | -3.54 | 0.14 | 0.0002 | 0.0050 | 0.57 | all_v2.0.6017.C2               | Zgc:92811; n=1; Danio reio Rep: Zgc:92811 - Danio reio (Zebrafish) (Brachydanio reio)                                                                                                       |

|       |       |      |        |        |      |                            |                                                                                                                                                                                                                                              |
|-------|-------|------|--------|--------|------|----------------------------|----------------------------------------------------------------------------------------------------------------------------------------------------------------------------------------------------------------------------------------------|
| 44373 | -3.75 | 0.15 | 0.0001 | 0.0038 | 0.56 | sb_gmapov_002h23.pDN Rm13r | CBX4; chromobox homolog 4 (Pc class homolog, Drosophila)                                                                                                                                                                                     |
| 46942 | -4.55 | 0.10 | 0.0000 | 0.0019 | 0.56 | all_v2.0.1824_2.C1         | Unassigned protein<br>Novel protein similar to vertebrate vacuolar protein sorting 4 homolog B; n=4; Danio rerio Rep: Novel protein similar to vertebrate vacuolar protein sorting 4 homolog B - Danio rerio (Zebrafish) (Brachydanio rerio) |
| 39550 | -3.25 | 0.18 | 0.0003 | 0.0076 | 0.55 | all_v2.0.4405.C1           | Caldesmon multi-domain protein                                                                                                                                                                                                               |
| 44357 | -4.78 | 0.11 | 0.0000 | 0.0017 | 0.54 | all_v2.0.4599.C1           | Unassigned protein                                                                                                                                                                                                                           |
| 48035 | -3.49 | 0.19 | 0.0002 | 0.0053 | 0.53 | sb_gmnlstfc_0006g23.t7     | Protocadherin 2G24; n=2; Tetraodontidae Rep: Protocadherin 2G24 - Fugu rubripes (Japanese pufferfish) (Takifugu rubripes)                                                                                                                    |
| 41581 | -4.76 | 0.12 | 0.0000 | 0.0017 | 0.52 | sb_gmnl1a_0036k22.sp6      | unclassified                                                                                                                                                                                                                                 |
| 55012 | -4.07 | 0.15 | 0.0001 | 0.0026 | 0.52 | all_v2.0.365.C1            | unclassified                                                                                                                                                                                                                                 |
| 51726 | -4.85 | 0.12 | 0.0000 | 0.0017 | 0.51 | all_v2.0.447.C1            | Zgc:92082; n=4; Clupeocephala Rep: Zgc:92082 - Danio rerio (Zebrafish) (Brachydanio rerio)                                                                                                                                                   |
| 44053 | -4.95 | 0.12 | 0.0000 | 0.0016 | 0.50 | all_v2.0.9640.C1           | unclassified                                                                                                                                                                                                                                 |
| 55146 | -4.67 | 0.14 | 0.0000 | 0.0018 | 0.49 | all_v2.0.712.C1            | Unassigned protein                                                                                                                                                                                                                           |
| 46599 | -3.59 | 0.21 | 0.0001 | 0.0046 | 0.48 | sb_gmnlem_0013c08.sp6      | unclassified                                                                                                                                                                                                                                 |
| 54442 | -3.31 | 0.28 | 0.0003 | 0.0070 | 0.46 | all_v2.0.3297.C1           | PSMC3 interacting protein isoform 1; n=1; Takifugu rubripes Rep: PSMC3 interacting protein isoform 1 - Takifugu rubripes                                                                                                                     |
| 41600 | -3.42 | 0.25 | 0.0002 | 0.0059 | 0.45 | all_v2.0.1869_8.C1         | unclassified                                                                                                                                                                                                                                 |
| 53859 | -3.32 | 0.26 | 0.0003 | 0.0069 | 0.44 | all_v2.0.5016.C2           | unclassified                                                                                                                                                                                                                                 |
| 49988 | -3.67 | 0.25 | 0.0001 | 0.0042 | 0.44 | all_v2.0.9043.C1           | custom - cod hemoglobin                                                                                                                                                                                                                      |
| 44480 | -3.35 | 0.30 | 0.0002 | 0.0065 | 0.39 | 2HBA3                      | Viral A-type inclusion protein repeat; n=2; Entamoeba histolytica HM-1:IMSS Rep: Viral A-type inclusion protein repeat - Entamoeba histolytica HM-1:IMSS                                                                                     |
| 43204 | -3.26 | 0.38 | 0.0003 | 0.0075 | 0.37 | all_v2.0.4026.C3           | Unassigned protein                                                                                                                                                                                                                           |
| 47836 | -3.25 | 0.36 | 0.0003 | 0.0076 | 0.33 | all_v2.0.6287.C1           | Zgc:154086; n=1; Danio rerio Rep: Zgc:154086 - Danio rerio (Zebrafish) (Brachydanio rerio)                                                                                                                                                   |
| 43729 | -3.67 | 0.37 | 0.0001 | 0.0041 | 0.30 | all_v2.0.6906.C1           | CDC27 multi-domain protein                                                                                                                                                                                                                   |
| 44381 | -4.73 | 0.33 | 0.0000 | 0.0018 | 0.25 | all_v2.0.200.C3            |                                                                                                                                                                                                                                              |

<sup>a</sup>Fold-changes are presented as outputted by siggenes and were calculated as pIC/PBS

Supplemental Table S4. 999 genes differentially expressed between fish injected with pIC or PBS at 10°C and sampled at 24HPI

| Probe ID | d-value | Stdev | Raw p  | q-value | Fold Change <sup>a</sup> | Sequence Name         | Gene Name                                                                                                                                                                                                 |
|----------|---------|-------|--------|---------|--------------------------|-----------------------|-----------------------------------------------------------------------------------------------------------------------------------------------------------------------------------------------------------|
| 38604    | 23.85   | 0.21  | 0.0000 | 0.0012  | 90.24                    | all_v2.0.14.CB2       | Interferon stimulated gene 15; n=1; Gadus morhua Rep: Interferon stimulated gene 15 - Gadus morhua (Atlantic cod)                                                                                         |
| 44453    | 21.28   | 0.23  | 0.0000 | 0.0012  | 70.53                    | CK10a                 | custom - CC chemokine                                                                                                                                                                                     |
| 44448    | 14.96   | 0.35  | 0.0000 | 0.0012  | 66.64                    | CK10ad                | custom - CC chemokine                                                                                                                                                                                     |
| 38605    | 18.23   | 0.26  | 0.0000 | 0.0012  | 50.90                    | all_v2.0.14.C13       | Interferon stimulated gene 15; n=1; Gadus morhua Rep: Interferon stimulated gene 15 - Gadus morhua (Atlantic cod)                                                                                         |
| 38613    | 10.54   | 0.44  | 0.0000 | 0.0012  | 40.99                    | all_v2.0.14.CB5       | Interferon stimulated gene 15; n=1; Gadus morhua Rep: Interferon stimulated gene 15 - Gadus morhua (Atlantic cod)                                                                                         |
| 41316    | 13.20   | 0.33  | 0.0000 | 0.0012  | 31.96                    | all_v2.0.1009.C5      | Probable ATP-dependent helicase LGP2 (EC 3.6.1.-) (Protein D11Lgp2 homolog); n=1; Takifugu rubripes Rep: Probable ATP-dependent helicase LGP2 (EC 3.6.1.-) (Protein D11Lgp2 homolog). - Takifugu rubripes |
| 44590    | 15.94   | 0.25  | 0.0000 | 0.0012  | 30.48                    | DXH4a                 | custom - probable ATP-dependent RNA helicase DHX                                                                                                                                                          |
| 45882    | 10.24   | 0.42  | 0.0000 | 0.0012  | 27.01                    | all_v2.0.5246.C1      | non-directed                                                                                                                                                                                              |
| 38611    | 11.57   | 0.37  | 0.0000 | 0.0012  | 26.98                    | all_v2.0.1767.C1      | Interferon stimulated gene 15; n=1; Gadus morhua Rep: Interferon stimulated gene 15 - Gadus morhua (Atlantic cod)                                                                                         |
| 38638    | 11.59   | 0.35  | 0.0000 | 0.0012  | 25.33                    | all_v2.0.638.C1       | Interleukin-8 variant 2; n=3; Ictalurus punctatus Rep: Interleukin-8 variant 2 - Ictalurus punctatus (Channel catfish)                                                                                    |
| 38609    | 17.37   | 0.21  | 0.0000 | 0.0012  | 25.28                    | all_v2.0.14.C3        | Interferon stimulated gene 15; n=1; Gadus morhua Rep: Interferon stimulated gene 15 - Gadus morhua (Atlantic cod)                                                                                         |
| 38608    | 20.16   | 0.17  | 0.0000 | 0.0012  | 24.81                    | all_v2.0.14.C12       | Interferon stimulated gene 15; n=1; Gadus morhua Rep: Interferon stimulated gene 15 - Gadus morhua (Atlantic cod)                                                                                         |
| 38606    | 23.91   | 0.13  | 0.0000 | 0.0012  | 23.34                    | all_v2.0.14.CB4       | Interferon stimulated gene 15; n=1; Gadus morhua Rep: Interferon stimulated gene 15 - Gadus morhua (Atlantic cod)                                                                                         |
| 38614    | 14.96   | 0.25  | 0.0000 | 0.0012  | 22.96                    | all_v2.0.7062.C2      | Interferon stimulated gene 15; n=1; Gadus morhua Rep: Interferon stimulated gene 15 - Gadus morhua (Atlantic cod)                                                                                         |
| 38639    | 16.33   | 0.20  | 0.0000 | 0.0012  | 20.00                    | all_v2.0.638.CB1      | Interleukin-8 variant 2; n=3; Ictalurus punctatus Rep: Interleukin-8 variant 2 - Ictalurus punctatus (Channel catfish)                                                                                    |
| 38356    | 11.32   | 0.32  | 0.0000 | 0.0012  | 17.37                    | all_v2.0.415.C6       | Homolog of Homo sapiens Spastic ataxia of Charlevoix-Saguenay; n=1; Takifugu rubripes Rep: Homolog of Homo sapiens Spastic ataxia of Charlevoix-Saguenay - Takifugu rubripes                              |
| 47164    | 9.84    | 0.36  | 0.0000 | 0.0012  | 16.08                    | all_v2.0.6027.C6      | Unassigned protein                                                                                                                                                                                        |
| 44589    | 13.88   | 0.24  | 0.0000 | 0.0012  | 15.92                    | DXH3b                 | custom - probable ATP-dependent RNA helicase DHX                                                                                                                                                          |
| 44588    | 14.79   | 0.21  | 0.0000 | 0.0012  | 14.50                    | DXH2b                 | custom - probable ATP-dependent RNA helicase DHX                                                                                                                                                          |
| 48390    | 8.42    | 0.42  | 0.0000 | 0.0012  | 14.24                    | all_v2.0.15354.C1     | Unassigned protein                                                                                                                                                                                        |
| 41269    | 14.19   | 0.21  | 0.0000 | 0.0012  | 13.93                    | sb_gmnlbfc_0004o20.t7 | PREDICTED: similar to zinc finger, NFX1-type containing 1; n=3; Laurasiatheria Rep: PREDICTED: similar to zinc finger, NFX1-type containing 1 - Equus caballus                                            |
| 41314    | 13.39   | 0.21  | 0.0000 | 0.0012  | 11.71                    | all_v2.0.5598.C1      | Probable ATP-dependent helicase LGP2 (EC 3.6.1.-) (Protein D11Lgp2 homolog); n=1; Takifugu rubripes Rep: Probable ATP-dependent helicase LGP2 (EC 3.6.1.-)                                                |



|       |       |      |        |        |       |                          |                                                                                                                                                                                                                |
|-------|-------|------|--------|--------|-------|--------------------------|----------------------------------------------------------------------------------------------------------------------------------------------------------------------------------------------------------------|
|       |       |      |        |        |       |                          | ) (Protein D11Lgp2 homolog). - Takifugu rubripes                                                                                                                                                               |
| 44859 | 19.78 | 0.12 | 0.0000 | 0.0012 | 11.50 | all_v2.0.314.C1          | HECT domain containing protein Interferon stimulated gene 15; n=1; Gadus morhua Rep: Interferon stimulated gene 15                                                                                             |
| 38603 | 16.08 | 0.16 | 0.0000 | 0.0012 | 11.33 | all_v2.0.14.CB7          | - Gadus morhua (Atlantic cod) ZPC4; n=2; Oryzias latipes Rep: ZPC4 -                                                                                                                                           |
| 44180 | 9.45  | 0.29 | 0.0000 | 0.0012 | 9.91  | all_v2.0.1266.C1         | Oryzias latipes (Medaka fish) (Japanese ricefish)                                                                                                                                                              |
| 38675 | 8.68  | 0.32 | 0.0000 | 0.0012 | 9.64  | all_v2.0.9761.C1         | Isoform S of Q761C6 ; n=1; Rattus norvegicus Rep: Isoform S of Q761C6 - Rattus norvegicus (Rat)                                                                                                                |
| 38617 | 6.17  | 0.47 | 0.0000 | 0.0013 | 8.88  | all_v2.0.13188.C1        | Interferon-inducible GTPase 5 (EC 3.6.5.-) (Immunity-related GTPase cinema 1).; n=3; Takifugu rubripes Rep: Interferon-inducible GTPase 5 (EC 3.6.5.-) (Immunity-related GTPase cinema 1). - Takifugu rubripes |
| 38651 | 9.23  | 0.27 | 0.0000 | 0.0012 | 8.50  | sb_gmapht_0023a03.pDNRF2 | Intraflagellar transport protein 52; n=4; Danio rerio Rep: Intraflagellar transport protein 52 - Brachydanio rerio (Zebrafish) (Danio rerio)                                                                   |
| 39328 | 9.23  | 0.29 | 0.0000 | 0.0012 | 8.43  | all_v2.0.2213.C1         | NFX1-type zinc finger-containing protein 1; n=5; Eutheria Rep: NFX1-type zinc finger-containing protein 1 - Homo sapiens (Human)                                                                               |
| 45361 | 8.84  | 0.27 | 0.0000 | 0.0012 | 7.77  | all_v2.0.34.C2           | LOC797694; similar to solute carrier family 25 member 5 protein                                                                                                                                                |
| 44464 | 13.27 | 0.16 | 0.0000 | 0.0012 | 7.60  | CK10add                  | custom - CC chemokine                                                                                                                                                                                          |
| 38612 | 13.33 | 0.16 | 0.0000 | 0.0012 | 7.48  | all_v2.0.14.CB3          | Interferon stimulated gene 15; n=1; Gadus morhua Rep: Interferon stimulated gene 15 - Gadus morhua (Atlantic cod)                                                                                              |
| 44584 | 10.78 | 0.21 | 0.0000 | 0.0012 | 7.33  | DXH1a                    | custom - probable ATP-dependent RNA helicase DHX                                                                                                                                                               |
| 47410 | 6.78  | 0.38 | 0.0000 | 0.0012 | 7.10  | sb_gmnlsfc_004h02.t7     | Unassigned protein                                                                                                                                                                                             |
| 40667 | 9.73  | 0.23 | 0.0000 | 0.0012 | 6.90  | all_v2.0.431.C8          | PREDICTED: similar to microtubule aggregate protein homolog; n=2; Danio rerio Rep: PREDICTED: similar to microtubule aggregate protein homolog - Danio rerio                                                   |
| 46200 | 7.92  | 0.30 | 0.0000 | 0.0012 | 6.76  | all_v2.0.14575.C1        | SACS; saccin                                                                                                                                                                                                   |
| 44591 | 13.29 | 0.14 | 0.0000 | 0.0012 | 6.45  | DXH4b                    | custom - probable ATP-dependent RNA helicase DHX                                                                                                                                                               |
| 38285 | 6.70  | 0.35 | 0.0000 | 0.0012 | 6.35  | sb_gmnlsfc_007k16.t7     | Homolog of Homo sapiens Probable ATP-dependent helicase LGP2; n=1; Takifugu rubripes Rep: Homolog of Homo sapiens Probable ATP-dependent helicase LGP2 - Takifugu rubripes                                     |
| 41313 | 12.34 | 0.15 | 0.0000 | 0.0012 | 6.07  | all_v2.0.1009.C1         | Probable ATP-dependent helicase LGP2 (EC 3.6.1.-) (Protein D11Lgp2 homolog).; n=1; Takifugu rubripes Rep: Probable ATP-dependent helicase LGP2 (EC 3.6.1.-) (Protein D11Lgp2 homolog). - Takifugu rubripes     |
| 44909 | 3.03  | 0.75 | 0.0008 | 0.0082 | 5.81  | all_v2.0.3619.C1         | Ifi-6-16 multi-domain protein                                                                                                                                                                                  |
| 49247 | 10.72 | 0.18 | 0.0000 | 0.0012 | 5.74  | all_v2.0.7226.C1         | unclassified                                                                                                                                                                                                   |
| 38354 | 9.00  | 0.23 | 0.0000 | 0.0012 | 5.68  | all_v2.0.707.C4          | Homolog of Homo sapiens Spastic ataxia of Charlevoix-Saguenay; n=1; Takifugu rubripes Rep: Homolog of Homo sapiens Spastic ataxia of Charlevoix-Saguenay - Takifugu rubripes                                   |
| 40939 | 8.04  | 0.25 | 0.0000 | 0.0012 | 5.66  | all_v2.0.910.C2          | PREDICTED: similar to Rhomboid, veinlet-like 7 (Drosophila); n=1; Danio rerio Rep: PREDICTED: similar to Rhomboid, veinlet-like 7 (Drosophila) -                                                               |

|       |       |      |        |        |      |                           |  |  | Danio rerio                                                                                                                                                                      |  |
|-------|-------|------|--------|--------|------|---------------------------|--|--|----------------------------------------------------------------------------------------------------------------------------------------------------------------------------------|--|
|       |       |      |        |        |      |                           |  |  | Homolog of Homo sapiens Spastic ataxia of Charlevoix-Saguenay; n=1; Takifugu rubripes Rep: Homolog of Homo sapiens Spastic ataxia of Charlevoix-Saguenay - Takifugu rubripes     |  |
| 38358 | 7.66  | 0.28 | 0.0000 | 0.0012 | 5.57 | all_v2.0.9190.C1          |  |  |                                                                                                                                                                                  |  |
| 47329 | 8.10  | 0.25 | 0.0000 | 0.0012 | 5.52 | all_v2.0.415.C3           |  |  | Unassigned protein                                                                                                                                                               |  |
|       |       |      |        |        |      |                           |  |  | Homolog of Homo sapiens Spastic ataxia of Charlevoix-Saguenay; n=1; Takifugu rubripes Rep: Homolog of Homo sapiens Spastic ataxia of Charlevoix-Saguenay - Takifugu rubripes     |  |
| 38359 | 11.04 | 0.17 | 0.0000 | 0.0012 | 5.50 | all_v2.0.415.C5           |  |  |                                                                                                                                                                                  |  |
|       |       |      |        |        |      | sb_gmnbbr_001             |  |  |                                                                                                                                                                                  |  |
|       |       |      |        |        |      | 3m15.pDNRm1               |  |  |                                                                                                                                                                                  |  |
| 47613 | 8.38  | 0.23 | 0.0000 | 0.0012 | 5.22 | 3r                        |  |  | Unassigned protein                                                                                                                                                               |  |
|       |       |      |        |        |      | all_v2.0.8766.C1          |  |  |                                                                                                                                                                                  |  |
| 55231 | 6.73  | 0.30 | 0.0000 | 0.0012 | 5.17 | 1                         |  |  | unclassified                                                                                                                                                                     |  |
|       |       |      |        |        |      |                           |  |  | Homolog of Homo sapiens Spastic ataxia of Charlevoix-Saguenay; n=1; Takifugu rubripes Rep: Homolog of Homo sapiens Spastic ataxia of Charlevoix-Saguenay - Takifugu rubripes     |  |
| 38357 | 8.53  | 0.22 | 0.0000 | 0.0012 | 5.14 | all_v2.0.8243.C1          |  |  |                                                                                                                                                                                  |  |
|       |       |      |        |        |      | all_v2.0.15359.C1         |  |  |                                                                                                                                                                                  |  |
| 55535 | 9.38  | 0.19 | 0.0000 | 0.0012 | 5.08 |                           |  |  | zp3a.1; zona pellucida glycoprotein 3a.1 Interferon stimulated gene 15; n=1; Gadus morhua Rep: Interferon stimulated gene 15 - Gadus morhua (Atlantic cod)                       |  |
| 38607 | 11.62 | 0.14 | 0.0000 | 0.0012 | 4.76 | all_v2.0.7062.C1          |  |  | Viperin-like protein; n=1; Channa argus Rep: Viperin-like protein - Channa argus (snakehead)                                                                                     |  |
|       |       |      |        |        |      | all_v2.0.9330.C1          |  |  |                                                                                                                                                                                  |  |
| 43201 | 6.89  | 0.26 | 0.0000 | 0.0012 | 4.68 | 1                         |  |  |                                                                                                                                                                                  |  |
|       |       |      |        |        |      | all_v2.0.14926.C1         |  |  | Unassigned protein                                                                                                                                                               |  |
| 48258 | 14.70 | 0.09 | 0.0000 | 0.0012 | 4.63 |                           |  |  |                                                                                                                                                                                  |  |
|       |       |      |        |        |      | all_v2.0.2805.C1          |  |  |                                                                                                                                                                                  |  |
| 44371 | 7.72  | 0.22 | 0.0000 | 0.0012 | 4.56 | 1                         |  |  | caspc; caspase c Gadd45al protein; n=2; Danio rerio Rep: Gadd45al protein - Danio rerio (Zebrafish) (Brachydanio rerio)                                                          |  |
| 37299 | 8.62  | 0.19 | 0.0000 | 0.0012 | 4.52 | all_v2.0.3679.C1          |  |  |                                                                                                                                                                                  |  |
| 47384 | 10.57 | 0.15 | 0.0000 | 0.0012 | 4.48 | all_v2.0.707.C1           |  |  | Unassigned protein                                                                                                                                                               |  |
|       |       |      |        |        |      | all_v2.0.2412.C1          |  |  |                                                                                                                                                                                  |  |
| 46199 | 5.61  | 0.34 | 0.0000 | 0.0013 | 4.35 | 1                         |  |  | SACS; saccin                                                                                                                                                                     |  |
|       |       |      |        |        |      |                           |  |  | Serpentine_recp domain containing protein                                                                                                                                        |  |
| 46226 | 9.55  | 0.16 | 0.0000 | 0.0012 | 4.30 | all_v2.0.415.C1           |  |  |                                                                                                                                                                                  |  |
|       |       |      |        |        |      | sb_gmnbhkc_0005c17.pDNRf2 |  |  | LOC539080; similar to immunity-related GTPase family, cinema 1                                                                                                                   |  |
| 45139 | 2.90  | 0.63 | 0.0012 | 0.0103 | 4.19 |                           |  |  | Actin-binding vascular maintenance protein; n=5; Danio rerio Rep: Actin-binding vascular maintenance protein - Danio rerio (Zebrafish) (Brachydanio rerio)                       |  |
| 35753 | 7.49  | 0.21 | 0.0000 | 0.0012 | 4.17 | sb_gmnlrsas_0003g09.t7    |  |  |                                                                                                                                                                                  |  |
|       |       |      |        |        |      |                           |  |  | Homolog of Carassius auratus Interferon-inducible protein Gig2.; n=4; Takifugu rubripes Rep: Homolog of Carassius auratus Interferon-inducible protein Gig2. - Takifugu rubripes |  |
| 37854 | 6.17  | 0.27 | 0.0000 | 0.0013 | 4.14 | sb_gmnlrfic_0002b12.t7    |  |  |                                                                                                                                                                                  |  |
|       |       |      |        |        |      | all_v2.0.7892.C1          |  |  |                                                                                                                                                                                  |  |
| 55502 | 8.29  | 0.18 | 0.0000 | 0.0012 | 4.14 | 1                         |  |  | zgc:110548; zgc:110548                                                                                                                                                           |  |
|       |       |      |        |        |      |                           |  |  | Homolog of Homo sapiens Phospholipase C-like 3; n=1; Takifugu rubripes Rep: Homolog of Homo sapiens Phospholipase C-like 3 - Takifugu rubripes                                   |  |
| 38260 | 2.78  | 0.49 | 0.0016 | 0.0127 | 4.11 | all_v2.0.16638.C1         |  |  |                                                                                                                                                                                  |  |
|       |       |      |        |        |      |                           |  |  | RING finger protein 213; n=3; Homo sapiens Rep: RING finger protein 213 - Homo sapiens (Human)                                                                                   |  |
| 41942 | 8.64  | 0.18 | 0.0000 | 0.0012 | 4.11 | all_v2.0.8660.C1          |  |  |                                                                                                                                                                                  |  |
|       |       |      |        |        |      |                           |  |  | Homolog of Homo sapiens TiTin isoform novex-2; n=1; Takifugu rubripes Rep: Homolog of Homo sapiens TiTin isoform novex-2 - Takifugu rubripes                                     |  |
| 38378 | 3.54  | 0.43 | 0.0003 | 0.0037 | 4.04 | all_v2.0.5950.C3          |  |  |                                                                                                                                                                                  |  |

|       |       |      |        |        |      |                                                       |                                                                                                                                                                                                                                                              |
|-------|-------|------|--------|--------|------|-------------------------------------------------------|--------------------------------------------------------------------------------------------------------------------------------------------------------------------------------------------------------------------------------------------------------------|
| 43196 | 6.85  | 0.24 | 0.0000 | 0.0012 | 4.04 | all_v2.0.3448.C3<br>sb_gmnbhkas_0009a09.pDNRF2        | VHSV-induced protein; n=1; Oncorhynchus mykiss Rep: VHSV-induced protein - Oncorhynchus mykiss (Rainbow trout) (Salmo gairdneri)                                                                                                                             |
| 44254 | 4.49  | 0.35 | 0.0001 | 0.0017 | 4.01 |                                                       | AhpC-TSA domain containing protein Homolog of Homo sapiens Deoxyribonuclease gamma precursor; n=1; Takifugu rubripes Rep: Homolog of Homo sapiens Deoxyribonuclease gamma precursor - Takifugu rubripes                                                      |
| 38042 | 9.38  | 0.15 | 0.0000 | 0.0012 | 3.94 | all_v2.0.894.C5                                       | Novel protein similar to vertebrate nebulin; n=3; Danio rerio Rep: Novel protein similar to vertebrate nebulin - Danio rerio (Zebrafish) (Brachydanio rerio)                                                                                                 |
| 39490 | 8.48  | 0.17 | 0.0000 | 0.0012 | 3.91 | all_v2.0.5879.C2                                      |                                                                                                                                                                                                                                                              |
| 51382 | 4.64  | 0.34 | 0.0001 | 0.0016 | 3.89 | all_v2.0.5897.C3<br>sb_gmnbmd_0010a21.pDNRm13r        | unclassified                                                                                                                                                                                                                                                 |
| 46202 | 7.12  | 0.21 | 0.0000 | 0.0012 | 3.85 |                                                       | Sacs_predicted; saccin (predicted) PREDICTED: similar to Snf2-related CBP activator protein; n=1; Mus musculus Rep: PREDICTED: similar to Snf2-related CBP activator protein - Mus musculus                                                                  |
| 41014 | 10.09 | 0.13 | 0.0000 | 0.0012 | 3.80 | all_v2.0.14158.C1<br>sb_gmnlmfta_0004i04.t7           | ARL6IP6; ADP-ribosylation-like factor 6 interacting protein 6                                                                                                                                                                                                |
| 44283 | 5.48  | 0.27 | 0.0000 | 0.0013 | 3.77 |                                                       |                                                                                                                                                                                                                                                              |
| 46412 | 6.35  | 0.24 | 0.0000 | 0.0013 | 3.77 | all_v2.0.10562.C1                                     | Ubiquitin family protein                                                                                                                                                                                                                                     |
| 45583 | 5.27  | 0.31 | 0.0000 | 0.0014 | 3.74 | all_v2.0.2772.C15                                     | non-directed                                                                                                                                                                                                                                                 |
| 54821 | 6.92  | 0.21 | 0.0000 | 0.0012 | 3.71 | all_v2.0.10668.C2                                     | unclassified                                                                                                                                                                                                                                                 |
| 39509 | 3.07  | 0.46 | 0.0008 | 0.0077 | 3.68 | all_v2.0.15398.C1                                     | Novel protein similar to vertebrate plectin 1, intermediate filament binding protein 500kDa; n=2; Danio rerio Rep: Novel protein similar to vertebrate plectin 1, intermediate filament binding protein 500kDa - Danio rerio (Zebrafish) (Brachydanio rerio) |
| 44587 | 9.54  | 0.14 | 0.0000 | 0.0012 | 3.66 | DXH3a                                                 | custom - probable ATP-dependent RNA helicase DHX                                                                                                                                                                                                             |
| 38670 | 5.86  | 0.27 | 0.0000 | 0.0013 | 3.66 | all_v2.0.3891.C1                                      | Isoform 2 of Q5R156 ; n=2; Danio rerio Rep: Isoform 2 of Q5R156 - Danio rerio (Zebrafish) (Brachydanio rerio)                                                                                                                                                |
| 41595 | 4.46  | 0.32 | 0.0001 | 0.0017 | 3.64 | sb_gmapov_0028i22.pDNRF2<br>sb_gmnsul1_0001h03.pDNRF2 | PRP4 pre-mRNA processing factor 4 homolog; n=2; Danio rerio Rep: PRP4 pre-mRNA processing factor 4 homolog - Brachydanio rerio (Zebrafish) (Danio rerio)                                                                                                     |
| 47806 | 9.35  | 0.14 | 0.0000 | 0.0012 | 3.64 |                                                       | Unassigned protein                                                                                                                                                                                                                                           |
| 38552 | 10.07 | 0.13 | 0.0000 | 0.0012 | 3.62 | all_v2.0.10046.C1                                     | ilvB (bacterial acetolactate synthase)-like; n=1; Takifugu rubripes Rep: ilvB (bacterial acetolactate synthase)-like - Takifugu rubripes                                                                                                                     |
| 49852 | 3.71  | 0.37 | 0.0002 | 0.0030 | 3.57 | all_v2.0.15227.C1                                     | unclassified                                                                                                                                                                                                                                                 |
| 42073 | 10.25 | 0.12 | 0.0000 | 0.0012 | 3.56 | all_v2.0.15254.C1                                     | Serine hydrolase-like protein 2 (EC 3.1.-.-); n=1; Takifugu rubripes Rep: Serine hydrolase-like protein 2 (EC 3.1.-.-) - Takifugu rubripes                                                                                                                   |
| 42028 | 5.31  | 0.28 | 0.0000 | 0.0014 | 3.53 | sb_gmnbhkcic_0012i24.pDNRF2                           | Secernin 3; n=3; Tetraodontidae Rep: Secernin 3 - Fugu rubripes (Japanese pufferfish) (Takifugu rubripes)                                                                                                                                                    |
| 37221 | 3.18  | 0.43 | 0.0006 | 0.0064 | 3.53 | all_v2.0.8506.C1                                      | Fibrinogen beta chain; n=1; Pseudosciaena crocea (Croceine croaker) Rep: Fibrinogen beta chain - Pseudosciaena crocea (Croceine croaker)                                                                                                                     |

|       |       |      |        |        |      |                                      |                                                                                                                                                                                                                                                                                                                                                     |
|-------|-------|------|--------|--------|------|--------------------------------------|-----------------------------------------------------------------------------------------------------------------------------------------------------------------------------------------------------------------------------------------------------------------------------------------------------------------------------------------------------|
| 53239 | 3.02  | 0.62 | 0.0009 | 0.0084 | 3.52 | all_v2.0.5097.C<br>2                 | unclassified<br>Myelin transcription factor 1-like protein (MyT1L protein) (MyT1-L).; n=1;                                                                                                                                                                                                                                                          |
| 39189 | 5.06  | 0.29 | 0.0000 | 0.0014 | 3.51 | sb_gmbhbkic_0<br>017j02.pDNRM<br>13r | Takifugu rubripes Rep: Myelin transcription factor 1-like protein (MyT1L protein) (MyT1-L). - Takifugu rubripes FK506 binding protein 4; n=3; Danio rerio Rep: FK506 binding protein 4 - Danio rerio (Zebrafish) (Brachydanio rerio)                                                                                                                |
| 37232 | 7.03  | 0.20 | 0.0000 | 0.0012 | 3.50 | all_v2.0.4884.C<br>1                 | cct5; chaperonin containing TCP1, subunit 5 (epsilon); K09497 T-complex protein 1 subunit epsilon                                                                                                                                                                                                                                                   |
| 44375 | 10.52 | 0.11 | 0.0000 | 0.0012 | 3.49 | all_v2.0.16663.<br>C1                | Twinfilin-2; n=2; Danio rerio Rep: Twinfilin-2 - Danio rerio (Zebrafish) (Brachydanio rerio)                                                                                                                                                                                                                                                        |
| 42842 | 7.88  | 0.17 | 0.0000 | 0.0012 | 3.46 | sb_gmnlmfta_0<br>005n11.t7           | Unassigned protein                                                                                                                                                                                                                                                                                                                                  |
| 47445 | 3.33  | 0.43 | 0.0004 | 0.0049 | 3.46 | sb_gmbmd_00<br>04h11.t7              |                                                                                                                                                                                                                                                                                                                                                     |
| 44324 | 5.69  | 0.26 | 0.0000 | 0.0013 | 3.45 | all_v2.0.1123.C<br>1                 | Atrophin-1 multi-domain protein Phospholipase D4 (EC 3.1.4.4) (PLD 4) (Choline phosphatase 4) (Phosphatidylcholine-hydrolyzing phospholipase D4).; n=1; Takifugu rubripes Rep: Phospholipase D4 (EC 3.1.4.4) (PLD 4) (Choline phosphatase 4) (Phosphatidylcholine-hydrolyzing phospholipase D4). - Takifugu rubripes                                |
| 39974 | 10.92 | 0.11 | 0.0000 | 0.0012 | 3.45 | all_v2.0.16283.<br>C1                |                                                                                                                                                                                                                                                                                                                                                     |
| 51171 | 7.85  | 0.17 | 0.0000 | 0.0012 | 3.44 | all_v2.0.12475.<br>C1                | unclassified<br>Bloodthirsty; n=2; Notothenioidei Rep: Bloodthirsty - Chaenocephalus aceratus (White crocodile fish)                                                                                                                                                                                                                                |
| 36190 | 5.51  | 0.28 | 0.0000 | 0.0013 | 3.43 | sb_gmapht_001<br>4i15.pDNRF2         |                                                                                                                                                                                                                                                                                                                                                     |
| 54090 | 6.62  | 0.21 | 0.0000 | 0.0012 | 3.42 | all_v2.0.2294.C<br>1                 | unclassified<br>Phospholipase D4; n=3; Murinae Rep: Phospholipase D4 - Mus musculus (Mouse)                                                                                                                                                                                                                                                         |
| 39975 | 8.99  | 0.14 | 0.0000 | 0.0012 | 3.42 | all_v2.0.4370.C<br>3                 | PREDICTED: similar to Poly [ADP-ribose] polymerase 14 (PARP-14) (B aggressive lymphoma protein 2); n=1; Danio rerio Rep: PREDICTED: similar to Poly [ADP-ribose] polymerase 14 (PARP-14) (B aggressive lymphoma protein 2) - Danio rerio                                                                                                            |
| 40846 | 5.22  | 0.29 | 0.0000 | 0.0014 | 3.41 | all_v2.0.4119.C<br>1                 | NFX1-type zinc finger-containing protein 1.; n=1; Takifugu rubripes Rep: NFX1-type zinc finger-containing protein 1 - Takifugu rubripes                                                                                                                                                                                                             |
| 39325 | 8.14  | 0.16 | 0.0000 | 0.0012 | 3.40 | all_v2.0.9595.C<br>2                 |                                                                                                                                                                                                                                                                                                                                                     |
| 54933 | 5.64  | 0.25 | 0.0000 | 0.0013 | 3.39 | all_v2.0.5297.C<br>2                 | unclassified                                                                                                                                                                                                                                                                                                                                        |
| 45506 | 7.01  | 0.20 | 0.0000 | 0.0012 | 3.37 | all_v2.0.9616.C<br>1.a               | non-directed                                                                                                                                                                                                                                                                                                                                        |
| 44546 | 7.46  | 0.18 | 0.0000 | 0.0012 | 3.35 | IRF1OK4                              | custom - Interferon regulatory factor 10K                                                                                                                                                                                                                                                                                                           |
| 47050 | 10.19 | 0.11 | 0.0000 | 0.0012 | 3.34 | sb_gmapte_001<br>2e14.pDNRF2         | Unassigned protein                                                                                                                                                                                                                                                                                                                                  |
| 38598 | 9.86  | 0.12 | 0.0000 | 0.0012 | 3.34 | all_v2.0.1580.C<br>7                 | Interferon regulatory factor 1; n=1; Channa argus Rep: Interferon regulatory factor 1 - Channa argus (snakehead) PREDICTED: similar to ATPase, H+ transporting, lysosomal V0 subunit a isoform 1 isoform 2; n=1; Canis familiaris Rep: PREDICTED: similar to ATPase, H+ transporting, lysosomal V0 subunit a isoform 1 isoform 2 - Canis familiaris |
| 40236 | 3.30  | 0.39 | 0.0004 | 0.0053 | 3.32 | sb_gmapov_001<br>6j14.pDNRF2         | Bloodthirsty; n=2; Notothenioidei Rep: Bloodthirsty - Chaenocephalus aceratus (White crocodile fish)                                                                                                                                                                                                                                                |
| 36186 | 12.62 | 0.08 | 0.0000 | 0.0012 | 3.30 | all_v2.0.661.C2                      |                                                                                                                                                                                                                                                                                                                                                     |

|       |       |      |        |        |      |                            |                                                                                                                                                                                                                                                                                                 |
|-------|-------|------|--------|--------|------|----------------------------|-------------------------------------------------------------------------------------------------------------------------------------------------------------------------------------------------------------------------------------------------------------------------------------------------|
| 41829 | 6.70  | 0.20 | 0.0000 | 0.0012 | 3.29 | sb_gmnblits_0018p08.pDNRF2 | RFK protein; n=2; Bos taurus Rep: RFK protein - Bos taurus (Bovine)<br>Probable ATP-dependent helicase LGP2 (EC 3.6.1.-) (Protein D11Lgp2 homolog).; n=1; Takifugu rubripes Rep: Probable ATP-dependent helicase LGP2 (EC 3.6.1.-) (Protein D11Lgp2 homolog). - Takifugu rubripes               |
| 41317 | 9.36  | 0.12 | 0.0000 | 0.0012 | 3.27 | all_v2.0.1165.C4           |                                                                                                                                                                                                                                                                                                 |
| 51371 | 10.10 | 0.11 | 0.0000 | 0.0012 | 3.25 | all_v2.0.5978.C1           | unclassified<br>VHSV-induced protein; n=1;<br>Oncorhynchus mykiss Rep: VHSV-induced protein - Oncorhynchus mykiss (Rainbow trout) (Salmo gairdneri)                                                                                                                                             |
| 43197 | 4.96  | 0.33 | 0.0000 | 0.0014 | 3.24 | all_v2.0.3448.C4           |                                                                                                                                                                                                                                                                                                 |
| 45076 | 4.46  | 0.30 | 0.0001 | 0.0017 | 3.24 | sb_gmapov_0017b11.pDNRM13r | LOC465562; similar to thymopoietin beta<br>Novel immune type receptor protein; n=1;<br>Danio rerio Rep: Novel immune type receptor protein - Danio rerio (Zebrafish) (Brachydanio rerio)                                                                                                        |
| 39368 | 2.86  | 0.46 | 0.0013 | 0.0112 | 3.23 | all_v2.0.11577.C1          |                                                                                                                                                                                                                                                                                                 |
| 44543 | 6.20  | 0.21 | 0.0000 | 0.0013 | 3.23 | IRF1OK1                    | custom - Interferon regulatory factor 10K<br>PREDICTED: similar to SPAC167.01; n=1; Danio rerio Rep: PREDICTED: similar to SPAC167.01 - Danio rerio                                                                                                                                             |
| 41027 | 4.03  | 0.42 | 0.0001 | 0.0022 | 3.19 | sb_gmlbgits_0004k02.sp6    |                                                                                                                                                                                                                                                                                                 |
| 54050 | 4.98  | 0.28 | 0.0000 | 0.0014 | 3.19 | all_v2.0.9224.C1           | unclassified                                                                                                                                                                                                                                                                                    |
| 45749 | 6.02  | 0.22 | 0.0000 | 0.0013 | 3.19 | all_v2.0.17951.C1.a        | non-directed<br>K14 protein; n=1; Xenopus laevis Rep: K14 protein - Xenopus laevis (African clawed frog)                                                                                                                                                                                        |
| 38695 | 9.57  | 0.11 | 0.0000 | 0.0012 | 3.15 | all_v2.0.7632.C1           |                                                                                                                                                                                                                                                                                                 |
| 55051 | 5.59  | 0.23 | 0.0000 | 0.0013 | 3.14 | all_v2.0.9309.C1           | unclassified<br>Novel protein; n=2; Danio rerio Rep: Novel protein - Danio rerio (Zebrafish) (Brachydanio rerio)                                                                                                                                                                                |
| 39627 | 7.93  | 0.15 | 0.0000 | 0.0012 | 3.14 | all_v2.0.3732.C3           | Igsf2_predicted; immunoglobulin superfamily, member 2 (predicted);<br>K06522 immunoglobulin superfamily, member 2/3/2008                                                                                                                                                                        |
| 44919 | 4.11  | 0.32 | 0.0001 | 0.0021 | 3.12 | all_v2.0.17051.C1          | custom - probable ATP-dependent RNA helicase DHX                                                                                                                                                                                                                                                |
| 44586 | 4.93  | 0.28 | 0.0000 | 0.0014 | 3.11 | DXH1b                      |                                                                                                                                                                                                                                                                                                 |
| 46586 | 7.12  | 0.17 | 0.0000 | 0.0012 | 3.10 | sb_gmnlem_0013j07.sp6      | Unassigned protein                                                                                                                                                                                                                                                                              |
| 45162 | 6.99  | 0.18 | 0.0000 | 0.0012 | 3.09 | all_v2.0.7368.C2           | LOC561785; similar to very large inducible GTPase 1<br>Novel protein similar to vertebrate phosphoribosyl pyrophosphate amidotransferase; n=3; Danio rerio Rep: Novel protein similar to vertebrate phosphoribosyl pyrophosphate amidotransferase - Brachydanio rerio (Zebrafish) (Danio rerio) |
| 39505 | 7.50  | 0.16 | 0.0000 | 0.0012 | 3.08 | sb_gmapov_0018109.pDNRF2   |                                                                                                                                                                                                                                                                                                 |
| 45325 | 6.07  | 0.21 | 0.0000 | 0.0013 | 3.06 | all_v2.0.14677.C1          | LOC764254; similar to transposase<br>Interferon-inducible GTPase 5 (EC 3.6.5.-) (Immunity-related GTPase cinema 1).; n=3; Takifugu rubripes Rep: Interferon-inducible GTPase 5 (EC 3.6.5.-) (Immunity-related GTPase cinema 1). - Takifugu rubripes                                             |
| 38618 | 3.02  | 0.40 | 0.0009 | 0.0084 | 3.04 | all_v2.0.3462.C1           | Heterogeneous nuclear ribonucleoprotein A3; n=2; Takifugu rubripes Rep: Heterogeneous nuclear ribonucleoprotein A3 - Fugu rubripes (Japanese pufferfish) (Takifugu rubripes)                                                                                                                    |
| 37611 | 3.60  | 0.35 | 0.0002 | 0.0034 | 3.04 | all_v2.0.2730.C1           |                                                                                                                                                                                                                                                                                                 |
| 52906 | 7.72  | 0.15 | 0.0000 | 0.0012 | 3.04 | all_v2.0.2709.C1           | unclassified                                                                                                                                                                                                                                                                                    |

|       |       |      |        |        |      |                              |                                                                                                                                                                                        |
|-------|-------|------|--------|--------|------|------------------------------|----------------------------------------------------------------------------------------------------------------------------------------------------------------------------------------|
| 43192 | 10.14 | 0.10 | 0.0000 | 0.0012 | 3.03 | sb_gmnlbric_0006j07.t7       | Vesicular glutamate transporter 2.2; n=3; Danio rerio Rep: Vesicular glutamate transporter 2.2 - Danio rerio (Zebrafish) (Brachydanio rerio)                                           |
| 35718 | 2.64  | 0.47 | 0.0023 | 0.0165 | 3.02 | sb_gmnbhkas_0013h13.pDNRF2   | A disintegrin and metalloproteinase domain 8; n=1; Danio rerio Rep: A disintegrin and metalloproteinase domain 8 - Brachydanio rerio (Zebrafish) (Danio rerio)                         |
| 40543 | 6.46  | 0.19 | 0.0000 | 0.0013 | 3.01 | all_v2.0.1220.C1             | PREDICTED: similar to hCG28999,; n=1; Monodelphis domestica Rep: Monodelphis domestica                                                                                                 |
| 51636 | 7.24  | 0.16 | 0.0000 | 0.0012 | 3.01 | all_v2.0.1410.C1             | unclassified                                                                                                                                                                           |
| 47462 | 6.02  | 0.21 | 0.0000 | 0.0013 | 2.99 | sb_gmnbhkas_0017n11.pDNRF2   | Unassigned protein                                                                                                                                                                     |
| 54507 | 2.99  | 0.39 | 0.0009 | 0.0088 | 2.97 | all_v2.0.6751.C1             | unclassified                                                                                                                                                                           |
| 44624 | 8.29  | 0.13 | 0.0000 | 0.0012 | 2.95 | Codviperin1                  | custom - viperin                                                                                                                                                                       |
| 45046 | 9.14  | 0.11 | 0.0000 | 0.0012 | 2.89 | sb_gmapht_0020j08.pDNRF2     | LOC420518; similar to putative tyrosine phosphatase                                                                                                                                    |
| 39077 | 9.18  | 0.11 | 0.0000 | 0.0012 | 2.88 | all_v2.0.431.C7              | Microtubule aggregate protein homolog; n=1; Perca flavescens Rep: Microtubule aggregate protein homolog - Perca flavescens (Yellow perch)                                              |
| 47156 | 5.16  | 0.25 | 0.0000 | 0.0014 | 2.88 | all_v2.0.617.C5              | Unassigned protein                                                                                                                                                                     |
| 47244 | 3.15  | 0.36 | 0.0006 | 0.0067 | 2.88 | sb_gmnbpcic_0009j16.pDNRM13r | Unassigned protein                                                                                                                                                                     |
| 48764 | 6.54  | 0.18 | 0.0000 | 0.0012 | 2.88 | all_v2.0.3141.C3             | Unassigned protein                                                                                                                                                                     |
| 39326 | 5.12  | 0.24 | 0.0000 | 0.0014 | 2.85 | all_v2.0.9595.C1             | NFX1-type zinc finger-containing protein 1.; n=1; Takifugu rubripes Rep: NFX1-type zinc finger-containing protein 1 - Takifugu rubripes                                                |
| 45784 | 6.33  | 0.18 | 0.0000 | 0.0013 | 2.85 | all_v2.0.17073.C1            | non-directed                                                                                                                                                                           |
| 47376 | 3.88  | 0.30 | 0.0002 | 0.0025 | 2.83 | all_v2.0.15415.C1            | Unassigned protein                                                                                                                                                                     |
| 45351 | 6.09  | 0.19 | 0.0000 | 0.0013 | 2.83 | all_v2.0.1010.C8             | LOC793474; similar to stonustoxin alpha-subunit                                                                                                                                        |
| 47847 | 5.31  | 0.22 | 0.0000 | 0.0014 | 2.79 | all_v2.0.14003.C2            | Unassigned protein                                                                                                                                                                     |
| 43557 | 6.31  | 0.18 | 0.0000 | 0.0013 | 2.78 | all_v2.0.2666.C5             | Zgc:113527; n=4; Danio rerio Rep: Zgc:113527 - Danio rerio (Zebrafish) (Brachydanio rerio)                                                                                             |
| 43639 | 3.01  | 0.51 | 0.0009 | 0.0085 | 2.77 | all_v2.0.8922.C1             | Zgc:152929; n=2; Danio rerio Rep: Zgc:152929 - Danio rerio (Zebrafish) (Brachydanio rerio)                                                                                             |
| 40397 | 3.74  | 0.34 | 0.0002 | 0.0029 | 2.76 | all_v2.0.6028.C2             | PREDICTED: similar to deltex 3-like (Drosophila); n=1; Danio rerio Rep: PREDICTED: similar to deltex 3-like (Drosophila) - Danio rerio                                                 |
| 38094 | 3.96  | 0.35 | 0.0001 | 0.0023 | 2.75 | sb_gmnbhkcic_0005c22.pDNRF2  | Homolog of Homo sapiens HECT domain and RCC1-like domain protein 3; n=1; Takifugu rubripes Rep: Homolog of Homo sapiens HECT domain and RCC1-like domain protein 3 - Takifugu rubripes |
| 41418 | 2.94  | 0.36 | 0.0010 | 0.0096 | 2.75 | all_v2.0.659.C1              | Proteasome subunit alpha type; n=8; Euteleostomi Rep: Proteasome subunit alpha type - Danio rerio (Zebrafish) (Brachydanio rerio)                                                      |
| 46411 | 4.01  | 0.29 | 0.0001 | 0.0022 | 2.75 | all_v2.0.4647.C1             | ubiquitin domain containing protein                                                                                                                                                    |
| 44117 | 5.97  | 0.18 | 0.0000 | 0.0013 | 2.74 | sb_gmnbgi_0002m22.pDNRF2     | Zinc finger CCCH type domain containing protein 1.; n=1; Xenopus tropicalis Rep: Zinc finger CCCH type domain containing                                                               |

|       |       |      |        |        |      |                              |                                                                                                                                                                                                                                                             |
|-------|-------|------|--------|--------|------|------------------------------|-------------------------------------------------------------------------------------------------------------------------------------------------------------------------------------------------------------------------------------------------------------|
|       |       |      |        |        |      |                              | protein 1 - <i>Xenopus tropicalis</i>                                                                                                                                                                                                                       |
|       |       |      |        |        |      |                              | Cardiac troponin T; n=14; <i>Danio rerio</i>  Rep: Cardiac troponin T - <i>Danio rerio</i> (Zebrafish) ( <i>Brachydanio rerio</i> )                                                                                                                         |
| 36311 | 6.52  | 0.16 | 0.0000 | 0.0012 | 2.73 | all_v2.0.12206.C1            | Homolog of <i>Carassius auratus</i> Interferon-inducible protein Gig2.; n=4; <i>Takifugu rubripes</i>  Rep: Homolog of <i>Carassius auratus</i> Interferon-inducible protein Gig2. - <i>Takifugu rubripes</i>                                               |
| 37853 | 7.22  | 0.14 | 0.0000 | 0.0012 | 2.73 | all_v2.0.7494.C1             |                                                                                                                                                                                                                                                             |
| 53370 | 6.28  | 0.18 | 0.0000 | 0.0013 | 2.72 | all_v2.0.11557.C2            | unclassified                                                                                                                                                                                                                                                |
|       |       |      |        |        |      |                              | PREDICTED: similar to scavenger receptor cysteine-rich protein precursor, partial; n=1; <i>Strongylocentrotus purpuratus</i>  Rep: PREDICTED: similar to scavenger receptor cysteine-rich protein precursor, partial - <i>Strongylocentrotus purpuratus</i> |
| 40980 | 6.35  | 0.17 | 0.0000 | 0.0013 | 2.71 | sb_gmapov_0018g11.pDNR       |                                                                                                                                                                                                                                                             |
| 55194 | 5.49  | 0.21 | 0.0000 | 0.0013 | 2.71 | all_v2.0.9305.C1             | unclassified                                                                                                                                                                                                                                                |
| 44585 | 3.29  | 0.51 | 0.0005 | 0.0053 | 2.71 | DXH2a                        | custom - probable ATP-dependent RNA helicase DHX                                                                                                                                                                                                            |
| 52706 | 12.44 | 0.06 | 0.0000 | 0.0012 | 2.70 | all_v2.0.17371.C1            | unclassified                                                                                                                                                                                                                                                |
|       |       |      |        |        |      |                              | Zgc:111879 protein; n=4; <i>Danio rerio</i>  Rep: Zgc:111879 protein - <i>Danio rerio</i> (Zebrafish) ( <i>Brachydanio rerio</i> )                                                                                                                          |
| 43476 | 5.73  | 0.20 | 0.0000 | 0.0013 | 2.68 | all_v2.0.11065.C1            |                                                                                                                                                                                                                                                             |
| 54924 | 7.69  | 0.13 | 0.0000 | 0.0012 | 2.68 | all_v2.0.12344.C1            | unclassified                                                                                                                                                                                                                                                |
|       |       |      |        |        |      |                              | Unassigned protein                                                                                                                                                                                                                                          |
| 48557 | 4.05  | 0.31 | 0.0001 | 0.0022 | 2.67 | sb_gmnbspic_0009m06.pDNRm13r |                                                                                                                                                                                                                                                             |
| 52606 | 6.47  | 0.16 | 0.0000 | 0.0013 | 2.67 | all_v2.0.5996.C2             | unclassified                                                                                                                                                                                                                                                |
|       |       |      |        |        |      |                              | Unassigned protein                                                                                                                                                                                                                                          |
| 47640 | 4.94  | 0.24 | 0.0000 | 0.0014 | 2.67 | sb_gmnbhkc_0015118.pDNRm13r  | Mitochondrial Rho GTPase 1-A; n=1; <i>Danio rerio</i>  Rep: Mitochondrial Rho GTPase 1-A - <i>Danio rerio</i> (Zebrafish) ( <i>Brachydanio rerio</i> )                                                                                                      |
| 39119 | 4.51  | 0.25 | 0.0001 | 0.0017 | 2.66 | all_v2.0.5993.C1             |                                                                                                                                                                                                                                                             |
| 49270 | 3.12  | 0.38 | 0.0007 | 0.0070 | 2.66 | all_v2.0.10470.C1            | unclassified                                                                                                                                                                                                                                                |
|       |       |      |        |        |      |                              | Homolog of <i>Homo sapiens</i> Spastic ataxia of Charlevoix-Saguenay; n=1; <i>Takifugu rubripes</i>  Rep: Homolog of <i>Homo sapiens</i> Spastic ataxia of Charlevoix-Saguenay - <i>Takifugu rubripes</i>                                                   |
| 38353 | 7.26  | 0.14 | 0.0000 | 0.0012 | 2.66 | all_v2.0.415.C2              | Homolog of <i>Homo sapiens</i> Chloride intracellular channel protein 4; n=1; <i>Takifugu rubripes</i>  Rep: Homolog of <i>Homo sapiens</i> Chloride intracellular channel protein 4 - <i>Takifugu rubripes</i>                                             |
| 38024 | 4.19  | 0.26 | 0.0001 | 0.0020 | 2.64 | sb_gmnlsfas_0004117.t7       | Novel protein; n=4; <i>Danio rerio</i>  Rep: Novel protein - <i>Danio rerio</i> (Zebrafish) ( <i>Brachydanio rerio</i> )                                                                                                                                    |
| 39694 | 2.56  | 0.39 | 0.0029 | 0.0191 | 2.64 | all_v2.0.14399.C1            | Homolog of <i>Homo sapiens</i> Microtubule-associated protein 2 isoform 3; n=1; <i>Takifugu rubripes</i>  Rep: Homolog of <i>Homo sapiens</i> Microtubule-associated protein 2 isoform 3 - <i>Takifugu rubripes</i>                                         |
| 38171 | 10.39 | 0.08 | 0.0000 | 0.0012 | 2.64 | all_v2.0.4661.C1             | PREDICTED: similar to APG16L beta; n=1; <i>Monodelphis domestica</i>  Rep: PREDICTED: similar to APG16L beta - <i>Monodelphis domestica</i>                                                                                                                 |
| 40226 | 3.06  | 0.35 | 0.0008 | 0.0077 | 2.63 | all_v2.0.8272.C1             | Bloodthirsty; n=2; <i>Notothenioidei</i>  Rep: Bloodthirsty - <i>Chaenocephalus aceratus</i> (White crocodile fish)                                                                                                                                         |
| 36195 | 12.18 | 0.06 | 0.0000 | 0.0012 | 2.62 | sb_gmnlfbc_0007a23.t7        |                                                                                                                                                                                                                                                             |
| 45862 | 5.52  | 0.20 | 0.0000 | 0.0013 | 2.61 | all_v2.0.16576.C1            | non-directed                                                                                                                                                                                                                                                |

|       |       |      |        |        |      |                                    |                                                                                                                                                                                                                                                                                                                                                 |
|-------|-------|------|--------|--------|------|------------------------------------|-------------------------------------------------------------------------------------------------------------------------------------------------------------------------------------------------------------------------------------------------------------------------------------------------------------------------------------------------|
| 44579 | 5.06  | 0.22 | 0.0000 | 0.0014 | 2.61 | 3MKK4_MAP2<br>K3                   | custom - Mitogen-activated protein kinase<br>kinase 4                                                                                                                                                                                                                                                                                           |
| 46519 | 2.62  | 0.39 | 0.0025 | 0.0172 | 2.60 | sb_gmnbhkas_0<br>012b05.pDNRF<br>2 | Unassigned protein                                                                                                                                                                                                                                                                                                                              |
| 49008 | 7.38  | 0.13 | 0.0000 | 0.0012 | 2.60 | sb_gmnl1a_000<br>2h23.t7           | Unassigned protein                                                                                                                                                                                                                                                                                                                              |
| 44336 | 6.43  | 0.16 | 0.0000 | 0.0013 | 2.59 | sb_gmapht_003<br>7b08.pDNRF2       | bloodthirsty [Notothenia coriiceps]<br>Beta-ureidopropionase (EC 3.5.1.6) (Beta-<br>alanine synthase) (N- carbamoyl-beta-<br>alanine amidohydrolase) (BUP-1).; n=1;<br>Takifugu rubripes Rep: Beta-<br>ureidopropionase (EC 3.5.1.6) (Beta-<br>alanine synthase) (N- carbamoyl-beta-<br>alanine amidohydrolase) (BUP-1). -<br>Takifugu rubripes |
| 36160 | 5.58  | 0.19 | 0.0000 | 0.0013 | 2.59 | all_v2.0.6011.C<br>2               | Reverse transcriptase-like protein; n=1;<br>Paralichthys olivaceus Rep: Reverse<br>transcriptase-like protein - Paralichthys<br>olivaceus (Japanese flounder)                                                                                                                                                                                   |
| 41810 | 6.52  | 0.16 | 0.0000 | 0.0012 | 2.59 | sb_gmnbhkc_0<br>006h11.pDNRF<br>2  | Bloodthirsty; n=2; Notothenioidei Rep:<br>Bloodthirsty - Chaenocephalus aceratus<br>(White crocodile fish)                                                                                                                                                                                                                                      |
| 36185 | 10.76 | 0.07 | 0.0000 | 0.0012 | 2.58 | all_v2.0.661.C2<br>0               | Apolipoprotein A-IV4; n=3; Takifugu<br>rubripes Rep: Apolipoprotein A-IV4 -<br>Fugu rubripes (Japanese pufferfish)<br>(Takifugu rubripes)                                                                                                                                                                                                       |
| 35957 | 6.27  | 0.17 | 0.0000 | 0.0013 | 2.58 | all_v2.0.15919.<br>C1              | unclassified                                                                                                                                                                                                                                                                                                                                    |
| 55269 | 5.68  | 0.18 | 0.0000 | 0.0013 | 2.56 | all_v2.0.9958.C<br>1               | unclassified                                                                                                                                                                                                                                                                                                                                    |
| 37073 | 5.02  | 0.21 | 0.0000 | 0.0014 | 2.56 | sb_gmnbpic_0<br>005b03.pDNRF<br>2  | EPST11 protein; n=3; Bos taurus Rep:<br>EPST11 protein - Bos taurus (Bovine)                                                                                                                                                                                                                                                                    |
| 47605 | 4.06  | 0.28 | 0.0001 | 0.0022 | 2.56 | sb_gmnl1a_004<br>4f23.t7           | Unassigned protein                                                                                                                                                                                                                                                                                                                              |
| 36317 | 5.44  | 0.20 | 0.0000 | 0.0013 | 2.56 | all_v2.0.15280.<br>C1              | Carnitine palmitoyltransferase II; n=2;<br>Danio rerio Rep: Carnitine<br>palmitoyltransferase II - Danio rerio<br>(Zebrafish) (Brachydanio rerio)                                                                                                                                                                                               |
| 38512 | 3.81  | 0.27 | 0.0002 | 0.0027 | 2.55 | all_v2.0.8649.C<br>1               | HRAS-like suppressor 3; n=1; Perca<br>flavescens Rep: HRAS-like suppressor 3 -<br>Perca flavescens (Yellow perch)                                                                                                                                                                                                                               |
| 46887 | 4.65  | 0.24 | 0.0001 | 0.0015 | 2.54 | sb_gmnbpic_0<br>013o02.pDNRF<br>2  | Unassigned protein                                                                                                                                                                                                                                                                                                                              |
| 44910 | 3.79  | 0.30 | 0.0002 | 0.0028 | 2.54 | all_v2.0.3619.C<br>2               | Ifi-6-16 multi-domain protein                                                                                                                                                                                                                                                                                                                   |
| 54925 | 3.61  | 0.32 | 0.0002 | 0.0034 | 2.54 | all_v2.0.6896.C<br>1               | unclassified                                                                                                                                                                                                                                                                                                                                    |
| 45229 | 2.62  | 0.41 | 0.0025 | 0.0172 | 2.53 | all_v2.0.5468.C<br>1               | LOC593299; similar to zinc finger protein<br>RING finger protein 213.; n=1; Gallus<br>gallus Rep: RING finger protein 213 -<br>Gallus gallus                                                                                                                                                                                                    |
| 41940 | 5.60  | 0.18 | 0.0000 | 0.0013 | 2.51 | sb_gmnbpic_0<br>015c08.pDNRF<br>2  | Sjogren syndrome antigen B; n=1; Danio<br>rerio Rep: Sjogren syndrome antigen B -<br>Danio rerio (Zebrafish) (Brachydanio<br>rerio)                                                                                                                                                                                                             |
| 42226 | 3.56  | 0.33 | 0.0003 | 0.0036 | 2.51 | all_v2.0.11820.<br>C1              | unclassified                                                                                                                                                                                                                                                                                                                                    |
| 52488 | 7.30  | 0.12 | 0.0000 | 0.0012 | 2.51 | all_v2.0.10916.<br>C1              | unclassified                                                                                                                                                                                                                                                                                                                                    |
| 54239 | 3.84  | 0.26 | 0.0002 | 0.0026 | 2.50 | all_v2.0.11344.<br>C1              | unclassified                                                                                                                                                                                                                                                                                                                                    |
| 40054 | 4.45  | 0.25 | 0.0001 | 0.0017 | 2.49 | all_v2.0.2666.C<br>4               | Poly [ADP-ribose] polymerase 15 (EC<br>2.4.2.30) (PARP-15) (B-aggressive<br>lymphoma protein 3).; n=1; Takifugu<br>rubripes Rep: Poly [ADP-ribose]<br>polymerase 15 (EC 2.4.2.30) (PARP-15)<br>(B-aggressive lymphoma protein 3). -<br>Takifugu rubripes                                                                                        |
| 50539 | 4.76  | 0.22 | 0.0001 | 0.0015 | 2.48 | all_v2.0.16996.                    | unclassified                                                                                                                                                                                                                                                                                                                                    |



|       |      |      |        |        |      |                              | C1                                        |  |  |
|-------|------|------|--------|--------|------|------------------------------|-------------------------------------------|--|--|
| 46576 | 8.54 | 0.10 | 0.0000 | 0.0012 | 2.48 | all_v2.0.4.C213              | Unassigned protein                        |  |  |
|       |      |      |        |        |      |                              | Complement component C3; n=1;             |  |  |
|       |      |      |        |        |      |                              | Paralichthys olivaceus Rep: Complement    |  |  |
| 36612 | 5.45 | 0.18 | 0.0000 | 0.0013 | 2.47 | all_v2.0.12481.C1            | component C3 - Paralichthys olivaceus     |  |  |
|       |      |      |        |        |      |                              | (Japanese flounder)                       |  |  |
|       |      |      |        |        |      |                              | PREDICTED: similar to 60 kDa heat         |  |  |
|       |      |      |        |        |      |                              | shock protein, mitochondrial precursor    |  |  |
|       |      |      |        |        |      |                              | (Hsp60) (60 kDa chaperonin) (CPN60)       |  |  |
|       |      |      |        |        |      |                              | (Heat shock protein 60) (HSP-60)          |  |  |
|       |      |      |        |        |      |                              | (Mitochondrial matrix protein P1) (HSP-   |  |  |
|       |      |      |        |        |      |                              | 65); n=1; Rattus norvegicus Rep:          |  |  |
|       |      |      |        |        |      |                              | PREDICTED: similar to 60 kDa heat         |  |  |
|       |      |      |        |        |      |                              | shock protein, mitochondrial precursor    |  |  |
|       |      |      |        |        |      |                              | (Hsp60) (60 kDa chaperonin) (CPN60)       |  |  |
|       |      |      |        |        |      |                              | (Heat shock protein 60) (HSP-60)          |  |  |
| 40174 | 4.75 | 0.22 | 0.0001 | 0.0015 | 2.46 | all_v2.0.11060.C1            | (Mitochondrial matrix protein P1) (HSP-   |  |  |
|       |      |      |        |        |      |                              | 65) - Rattus norvegicus                   |  |  |
| 48810 | 7.47 | 0.12 | 0.0000 | 0.0012 | 2.46 | all_v2.0.7149.C2             | Unassigned protein                        |  |  |
|       |      |      |        |        |      |                              | PREDICTED: similar to G protein-          |  |  |
|       |      |      |        |        |      |                              | coupled receptor 97; n=2; Canis           |  |  |
|       |      |      |        |        |      |                              | familiaris Rep: PREDICTED: similar to G   |  |  |
|       |      |      |        |        |      |                              | protein-coupled receptor 97 - Canis       |  |  |
| 40489 | 6.54 | 0.14 | 0.0000 | 0.0012 | 2.46 | sb_gmnbbbr_0003e16.pDNRF2    | familiaris                                |  |  |
|       |      |      |        |        |      |                              | PREDICTED: similar to tubby super-        |  |  |
|       |      |      |        |        |      |                              | family protein isoform 2; n=2;            |  |  |
|       |      |      |        |        |      |                              | Monodelphis domestica Rep:                |  |  |
|       |      |      |        |        |      |                              | PREDICTED: similar to tubby super-        |  |  |
|       |      |      |        |        |      |                              | family protein isoform 2 - Monodelphis    |  |  |
|       |      |      |        |        |      |                              | domestica                                 |  |  |
| 41164 | 6.57 | 0.14 | 0.0000 | 0.0012 | 2.44 | sb_gmnbspic_0006i05.pDNRm13r | Myomesin-2 (M-protein) (165 kDa titin-    |  |  |
|       |      |      |        |        |      |                              | associated protein) (165 kDa connectin-   |  |  |
|       |      |      |        |        |      |                              | associated protein); n=1; Takifugu        |  |  |
|       |      |      |        |        |      |                              | rubripes Rep: Myomesin-2 (M-protein)      |  |  |
|       |      |      |        |        |      |                              | (165 kDa titin-associated protein) (165   |  |  |
|       |      |      |        |        |      |                              | kDa connectin-associated protein). -      |  |  |
|       |      |      |        |        |      |                              | Takifugu rubripes                         |  |  |
|       |      |      |        |        |      |                              | Hepcidin; n=1; Pseudosciaena crocea       |  |  |
|       |      |      |        |        |      |                              | (Croceine croaker) Rep: Hepcidin -        |  |  |
|       |      |      |        |        |      |                              | Pseudosciaena crocea (Croceine croaker)   |  |  |
| 39204 | 6.33 | 0.15 | 0.0000 | 0.0013 | 2.44 | sb_gmnlmfta_0003111.t7       | Unassigned protein                        |  |  |
|       |      |      |        |        |      |                              | Unassigned protein                        |  |  |
|       |      |      |        |        |      |                              | Cyclin-L1; n=3; Xenopus Rep: Cyclin-L1    |  |  |
|       |      |      |        |        |      |                              | - Xenopus laevis (African clawed frog)    |  |  |
|       |      |      |        |        |      |                              | Caspase-1; n=1; Dicentrarchus labrax Rep: |  |  |
|       |      |      |        |        |      |                              | Caspase-1 - Dicentrarchus labrax          |  |  |
|       |      |      |        |        |      |                              | (European sea bass)                       |  |  |
|       |      |      |        |        |      |                              | LOC420294; similar to cylindromatosis     |  |  |
|       |      |      |        |        |      |                              | (turban tumor syndrome); cylindromatosis  |  |  |
|       |      |      |        |        |      |                              | 1, turban tumor syndrome                  |  |  |
| 45045 | 5.96 | 0.16 | 0.0000 | 0.0013 | 2.42 | all_v2.0.7551.C1             | Unassigned protein                        |  |  |
|       |      |      |        |        |      |                              | Unassigned protein                        |  |  |
|       |      |      |        |        |      |                              | Unassigned protein                        |  |  |
|       |      |      |        |        |      |                              | unclassified                              |  |  |
|       |      |      |        |        |      |                              | UCH domain containing protein             |  |  |
|       |      |      |        |        |      |                              | PREDICTED: similar to Poly [ADP-          |  |  |
|       |      |      |        |        |      |                              | ribose] polymerase 14 (PARP-14) (B        |  |  |
|       |      |      |        |        |      |                              | aggressive lymphoma protein 2), partial   |  |  |
|       |      |      |        |        |      |                              | [Danio rerio]                             |  |  |
| 46051 | 6.59 | 0.14 | 0.0000 | 0.0012 | 2.39 | sb_gmnbhkc_0019j15.pDNRF2    | non-directed                              |  |  |
|       |      |      |        |        |      |                              | Ribulose-5-phosphate-3-epimerase; n=1;    |  |  |
|       |      |      |        |        |      |                              | Danio rerio Rep: Ribulose-5-phosphate-3-  |  |  |
|       |      |      |        |        |      |                              | epimerase - Brachydanio rerio (Zebrafish) |  |  |
|       |      |      |        |        |      |                              | (Danio rerio)                             |  |  |
| 45542 | 6.94 | 0.13 | 0.0000 | 0.0012 | 2.39 | all_v2.0.16396.C1.a          | Unassigned protein                        |  |  |
|       |      |      |        |        |      |                              | Unassigned protein                        |  |  |
|       |      |      |        |        |      |                              | Unassigned protein                        |  |  |
|       |      |      |        |        |      |                              | unclassified                              |  |  |
|       |      |      |        |        |      |                              | UCH domain containing protein             |  |  |
|       |      |      |        |        |      |                              | PREDICTED: similar to Poly [ADP-          |  |  |
|       |      |      |        |        |      |                              | ribose] polymerase 14 (PARP-14) (B        |  |  |
|       |      |      |        |        |      |                              | aggressive lymphoma protein 2), partial   |  |  |
|       |      |      |        |        |      |                              | [Danio rerio]                             |  |  |
| 41920 | 5.72 | 0.16 | 0.0000 | 0.0013 | 2.39 | sb_gmapov_0012i04.pDNRF2     | non-directed                              |  |  |
|       |      |      |        |        |      |                              | Ribulose-5-phosphate-3-epimerase; n=1;    |  |  |
|       |      |      |        |        |      |                              | Danio rerio Rep: Ribulose-5-phosphate-3-  |  |  |
|       |      |      |        |        |      |                              | epimerase - Brachydanio rerio (Zebrafish) |  |  |
|       |      |      |        |        |      |                              | (Danio rerio)                             |  |  |

|       |      |      |        |        |      |                              |                                                                                                                                                                                                                                                                                                                                                                                                       |
|-------|------|------|--------|--------|------|------------------------------|-------------------------------------------------------------------------------------------------------------------------------------------------------------------------------------------------------------------------------------------------------------------------------------------------------------------------------------------------------------------------------------------------------|
| 44655 | 4.31 | 0.22 | 0.0001 | 0.0018 | 2.39 | all_v2.0.392.C1              | DMP1 domain containing protein                                                                                                                                                                                                                                                                                                                                                                        |
| 55211 | 4.70 | 0.21 | 0.0001 | 0.0015 | 2.39 | all_v2.0.6615.C1             | unclassified<br>PREDICTED: similar to putative pol protein; n=1; Danio rerio Rep: PREDICTED: similar to putative pol protein - Danio rerio                                                                                                                                                                                                                                                            |
| 40905 | 3.17 | 0.31 | 0.0006 | 0.0065 | 2.38 | sb_gmnlskic_0005p12.pDNRF2   |                                                                                                                                                                                                                                                                                                                                                                                                       |
| 48537 | 5.19 | 0.19 | 0.0000 | 0.0014 | 2.38 | sb_gmnbhkas_0017n11.pDNRM13r | Unassigned protein                                                                                                                                                                                                                                                                                                                                                                                    |
| 46805 | 3.71 | 0.28 | 0.0002 | 0.0030 | 2.36 | all_v2.0.14762.C1            | Unassigned protein<br>PREDICTED: similar to Vacuolar protein sorting 26 homolog (VPS26 protein homolog); n=1; Canis lupus familiaris Rep: PREDICTED: similar to Vacuolar protein sorting 26 homolog (VPS26 protein homolog) - Canis familiaris                                                                                                                                                        |
| 41202 | 2.45 | 0.46 | 0.0039 | 0.0232 | 2.36 | all_v2.0.3558.C3             | Ubiquitin carrier protein; n=1; Tetrahymena thermophila SB210 Rep: Ubiquitin carrier protein - Tetrahymena thermophila SB210<br>PREDICTED: similar to Sec61, alpha subunit 2; n=1; Canis familiaris Rep: PREDICTED: similar to Sec61, alpha subunit 2 - Canis familiaris                                                                                                                              |
| 42908 | 3.43 | 0.27 | 0.0003 | 0.0043 | 2.34 | all_v2.0.2624.C2             |                                                                                                                                                                                                                                                                                                                                                                                                       |
| 40983 | 2.47 | 0.39 | 0.0037 | 0.0222 | 2.34 | sb_gmnbbr_0020h08.pDNRF2     |                                                                                                                                                                                                                                                                                                                                                                                                       |
| 44665 | 4.75 | 0.20 | 0.0001 | 0.0015 | 2.34 | all_v2.0.13567.C1            | Drf_FH1 multi-domain protein                                                                                                                                                                                                                                                                                                                                                                          |
| 46543 | 4.13 | 0.24 | 0.0001 | 0.0020 | 2.33 | sb_gmnbspic_0010p09.pDNRM13r | Unassigned protein<br>Probable bifunctional E2/E3 enzyme R795 [Includes: E3 ubiquitin- protein ligase (EC 6.3.2.-); Ubiquitin-conjugating enzyme E2 (EC 6.3.2.19)]; n=1; Acanthamoeba polyphaga mimivirus Rep: Probable bifunctional E2/E3 enzyme R795 [Includes: E3 ubiquitin- protein ligase (EC 6.3.2.-); Ubiquitin-conjugating enzyme E2 (EC 6.3.2.19)] - Acanthamoeba polyphaga mimivirus (APMV) |
| 41335 | 4.21 | 0.23 | 0.0001 | 0.0019 | 2.32 | all_v2.0.2624.C3             | Transmembrane protein 7; n=1; Siniperca chuatsi Rep: Transmembrane protein 7 - Siniperca chuatsi (Chinese perch)                                                                                                                                                                                                                                                                                      |
| 42748 | 4.11 | 0.26 | 0.0001 | 0.0021 | 2.32 | all_v2.0.9596.C1             | Baculoviral IAP repeat-containing 3; n=4; Otophysi Rep: Baculoviral IAP repeat-containing 3 - Brachydanio rerio (Zebrafish) (Danio rerio)                                                                                                                                                                                                                                                             |
| 36093 | 2.60 | 0.33 | 0.0026 | 0.0176 | 2.31 | sb_gmapte_0002b21.pDNRM13r   | Lily-type lectin; n=1; Platycephalus indicus Rep: Lily-type lectin - Platycephalus indicus (bartail flathead)                                                                                                                                                                                                                                                                                         |
| 38788 | 5.60 | 0.16 | 0.0000 | 0.0013 | 2.30 | all_v2.0.1155.C2             | PREDICTED: similar to stonustoxin alpha-subunit; n=3; Danio rerio Rep: PREDICTED: similar to stonustoxin alpha-subunit - Danio rerio                                                                                                                                                                                                                                                                  |
| 41043 | 4.43 | 0.20 | 0.0001 | 0.0017 | 2.30 | all_v2.0.1010.C10            | Zgc:136346; n=7; Danio rerio Rep: Zgc:136346 - Brachydanio rerio (Zebrafish) (Danio rerio)                                                                                                                                                                                                                                                                                                            |
| 43598 | 5.94 | 0.15 | 0.0000 | 0.0013 | 2.29 | sb_gmnbmu_0001b07.pDNRM13r   | Zgc:158652 protein; n=3; Danio rerio Rep: Zgc:158652 protein - Danio rerio (Zebrafish) (Brachydanio rerio)                                                                                                                                                                                                                                                                                            |
| 43767 | 6.99 | 0.12 | 0.0000 | 0.0012 | 2.29 | all_v2.0.8336.C1             | UPI000065EC34 related cluster; n=1; Takifugu rubripes Rep: UPI000065EC34 UniRef100 entry - Takifugu rubripes                                                                                                                                                                                                                                                                                          |
| 43007 | 4.01 | 0.24 | 0.0001 | 0.0022 | 2.28 | sb_gmapov_0013f18.pDNRF2     |                                                                                                                                                                                                                                                                                                                                                                                                       |
| 53251 | 4.36 | 0.20 | 0.0001 | 0.0018 | 2.28 | all_v2.0.13404.C1            | unclassified                                                                                                                                                                                                                                                                                                                                                                                          |
| 55397 | 5.60 | 0.15 | 0.0000 | 0.0013 | 2.27 | all_v2.0.14900.C1            | unclassified                                                                                                                                                                                                                                                                                                                                                                                          |

|       |      |      |        |        |      |                          |                                                                                                                                                                                                                               |
|-------|------|------|--------|--------|------|--------------------------|-------------------------------------------------------------------------------------------------------------------------------------------------------------------------------------------------------------------------------|
| 43453 | 3.54 | 0.29 | 0.0003 | 0.0037 | 2.27 | all_v2.0.13478.C1        | Zgc:110652; n=1; Danio rerio Rep: Zgc:110652 - Danio rerio (Zebrafish) (Brachydanio rerio)                                                                                                                                    |
| 39798 | 3.76 | 0.26 | 0.0002 | 0.0028 | 2.27 | all_v2.0.8253.C1         | Opioid growth factor receptor; n=2; Salmo salar Rep: Opioid growth factor receptor - Salmo salar (Atlantic salmon)                                                                                                            |
| 48344 | 4.83 | 0.18 | 0.0001 | 0.0015 | 2.27 | sb_gmnlkfas_0003n17.t7   | Unassigned protein                                                                                                                                                                                                            |
| 44544 | 6.07 | 0.14 | 0.0000 | 0.0013 | 2.26 | IRF1OK2                  | custom - Interferon regulatory factor 10K                                                                                                                                                                                     |
| 47008 | 4.08 | 0.24 | 0.0001 | 0.0021 | 2.25 | all_v2.0.13597.C1        | Unassigned protein                                                                                                                                                                                                            |
| 51340 | 4.65 | 0.19 | 0.0001 | 0.0016 | 2.24 | all_v2.0.12995.C1        | unclassified                                                                                                                                                                                                                  |
| 42585 | 5.27 | 0.16 | 0.0000 | 0.0014 | 2.23 | all_v2.0.2335.C1         | Titin a; n=3; Danio rerio Rep: Titin a - Danio rerio (Zebrafish) (Brachydanio rerio)                                                                                                                                          |
| 37060 | 5.48 | 0.15 | 0.0000 | 0.0013 | 2.23 | sb_gmnlrsas_0003k23.t7   | Eph-like receptor tyrosine kinase rtk5; n=4; Danio rerio Rep: Eph-like receptor tyrosine kinase rtk5 - Danio rerio (Zebrafish) (Brachydanio rerio)                                                                            |
| 44884 | 3.68 | 0.30 | 0.0002 | 0.0031 | 2.22 | sb_gmapov_0019d14.pDNRF2 | Hexb; hexosaminidase B [EC:3.2.1.52]; K01207 beta-N-acetylhexosaminidase RING finger protein 213.; n=1; Gallus gallus Rep: RING finger protein 213 - Gallus gallus                                                            |
| 41937 | 3.90 | 0.22 | 0.0001 | 0.0025 | 2.20 | all_v2.0.7491.C2         | Bloodthirsty; n=2; Notothenioidei Rep: Bloodthirsty - Chaenocephalus aceratus (White crocodile fish)                                                                                                                          |
| 36193 | 5.23 | 0.16 | 0.0000 | 0.0014 | 2.19 | all_v2.0.661.C39         | Claudin 30; n=1; Oreochromis mossambicus Rep: Claudin 30 - Oreochromis mossambicus (Mozambique tilapia) (Tilapia mossambica)                                                                                                  |
| 36525 | 4.12 | 0.21 | 0.0001 | 0.0021 | 2.19 | all_v2.0.16620.C1        | H/ACA ribonucleoprotein complex subunit 3; n=1; Danio rerio Rep: H/ACA ribonucleoprotein complex subunit 3 - Danio rerio (Zebrafish) (Brachydanio rerio)                                                                      |
| 37525 | 4.05 | 0.22 | 0.0001 | 0.0022 | 2.18 | all_v2.0.3167.C1         | Unassigned protein                                                                                                                                                                                                            |
| 47390 | 3.40 | 0.33 | 0.0004 | 0.0045 | 2.18 | sb_gmnlem_0005d01.t7     | LOC559696; similar to very large inducible GTPase 1                                                                                                                                                                           |
| 45155 | 2.63 | 0.35 | 0.0024 | 0.0169 | 2.18 | all_v2.0.13710.C1        | unclassified                                                                                                                                                                                                                  |
| 52620 | 2.91 | 0.33 | 0.0012 | 0.0103 | 2.17 | all_v2.0.12870.C1        | unclassified                                                                                                                                                                                                                  |
| 46324 | 6.06 | 0.12 | 0.0000 | 0.0013 | 2.16 | all_v2.0.16151.C1        | TFHS domain containing protein AHA1, activator of heat shock protein ATPase homolog 1, like; n=2; Danio rerio Rep: AHA1, activator of heat shock protein ATPase homolog 1, like - Danio rerio (Zebrafish) (Brachydanio rerio) |
| 35828 | 6.17 | 0.13 | 0.0000 | 0.0013 | 2.16 | all_v2.0.10754.C1        | Tubulin beta-2C chain; n=84; Eukaryota Rep: Tubulin beta-2C chain - Homo sapiens (Human)                                                                                                                                      |
| 42822 | 2.39 | 0.34 | 0.0045 | 0.0259 | 2.15 | all_v2.0.1349.C6         | non-directed                                                                                                                                                                                                                  |
| 45571 | 3.28 | 0.28 | 0.0005 | 0.0054 | 2.15 | all_v2.0.16142.C1        | RNA polymerase II subunit 5-mediating protein (RPB5-mediating protein).; n=1; Takifugu rubripes Rep: RNA polymerase II subunit 5-mediating protein (RPB5-mediating protein). - Takifugu rubripes                              |
| 41954 | 3.78 | 0.24 | 0.0002 | 0.0028 | 2.15 | all_v2.0.12540.C1        | Caspase-1; n=1; Dicentrarchus labrax Rep: Caspase-1 - Dicentrarchus labrax (European sea bass)                                                                                                                                |
| 36338 | 5.47 | 0.14 | 0.0000 | 0.0013 | 2.14 | all_v2.0.7453.C2         | Transglutaminase; n=1; Oncorhynchus keta Rep: Transglutaminase - Oncorhynchus keta (Chum salmon)                                                                                                                              |
| 42676 | 3.56 | 0.27 | 0.0003 | 0.0036 | 2.13 | all_v2.0.9799.C1         | unclassified                                                                                                                                                                                                                  |
| 51517 | 4.74 | 0.18 | 0.0001 | 0.0015 | 2.13 | all_v2.0.6615.C2         | Proteasome subunit alpha type-2; n=3; Xenopus Rep: Proteasome subunit alpha                                                                                                                                                   |
| 41421 | 4.00 | 0.23 | 0.0001 | 0.0023 | 2.12 | all_v2.0.1046.C1         |                                                                                                                                                                                                                               |

|       |      |      |        |        |      |                            |                                                                                                                                                                                                                                                                                                                      |
|-------|------|------|--------|--------|------|----------------------------|----------------------------------------------------------------------------------------------------------------------------------------------------------------------------------------------------------------------------------------------------------------------------------------------------------------------|
|       |      |      |        |        |      |                            | type-2 - Xenopus laevis (African clawed frog)                                                                                                                                                                                                                                                                        |
| 44450 | 3.17 | 0.27 | 0.0006 | 0.0065 | 2.12 | CK2c6                      | custom - CC chemokine                                                                                                                                                                                                                                                                                                |
| 49723 | 7.11 | 0.10 | 0.0000 | 0.0012 | 2.12 | all_v2.0.4732.C1           | unclassified                                                                                                                                                                                                                                                                                                         |
| 42929 | 3.89 | 0.22 | 0.0001 | 0.0025 | 2.12 | all_v2.0.473.C1            | Ubiquitin-conjugating enzyme E2 D4; n=11; Euteleostomi Rep: Ubiquitin-conjugating enzyme E2 D4 - Homo sapiens (Human)                                                                                                                                                                                                |
| 36364 | 2.79 | 0.36 | 0.0016 | 0.0126 | 2.11 | all_v2.0.8187.C1           | Cathepsin L.1; n=1; Danio rerio Rep: Cathepsin L.1 - Danio rerio (Zebrafish) (Brachydanio rerio)                                                                                                                                                                                                                     |
| 40670 | 5.80 | 0.13 | 0.0000 | 0.0013 | 2.11 | all_v2.0.14446.C1          | PREDICTED: similar to mitochondrial carrier triple repeat 6; n=1; Monodelphis domestica Rep: PREDICTED: similar to mitochondrial carrier triple repeat 6 - Monodelphis domestica                                                                                                                                     |
| 42754 | 4.12 | 0.22 | 0.0001 | 0.0021 | 2.11 | sb_gmbhkas_0008c11.pDNRf2  | Transport-associated protein; n=3; Salmonidae Rep: Transport-associated protein - Salmo salar (Atlantic salmon)                                                                                                                                                                                                      |
| 38355 | 5.68 | 0.13 | 0.0000 | 0.0013 | 2.11 | all_v2.0.8243.C2           | Homolog of Homo sapiens Spastic ataxia of Charlevoix-Saguenay; n=1; Takifugu rubripes Rep: Homolog of Homo sapiens Spastic ataxia of Charlevoix-Saguenay - Takifugu rubripes                                                                                                                                         |
| 42021 | 4.29 | 0.19 | 0.0001 | 0.0018 | 2.11 | all_v2.0.9962.C1           | Sdf1a; n=2; Danio rerio Rep: Sdf1a - Danio rerio (Zebrafish) (Brachydanio rerio)                                                                                                                                                                                                                                     |
| 44458 | 3.50 | 0.24 | 0.0003 | 0.0039 | 2.11 | CK2c1                      | custom - CC chemokine                                                                                                                                                                                                                                                                                                |
| 47827 | 5.15 | 0.15 | 0.0000 | 0.0014 | 2.11 | sb_gmbngi_0007a11.pDNRm13r | Unassigned protein                                                                                                                                                                                                                                                                                                   |
| 39240 | 4.05 | 0.20 | 0.0001 | 0.0022 | 2.10 | all_v2.0.11987.C1          | N-acylneuraminate-9-phosphatase (EC 3.1.3.29) (Neu5Ac-9-Pase) (Haloacid dehalogenase-like hydrolase domain-containing protein 4).; n=1; Takifugu rubripes Rep: N-acylneuraminate-9-phosphatase (EC 3.1.3.29) (Neu5Ac-9-Pase) (Haloacid dehalogenase-like hydrolase domain-containing protein 4). - Takifugu rubripes |
| 45143 | 7.37 | 0.09 | 0.0000 | 0.0012 | 2.10 | all_v2.0.8322.C2           | LOC540789; similar to poly (ADP-ribose) polymerase family, member 14                                                                                                                                                                                                                                                 |
| 39845 | 3.58 | 0.24 | 0.0002 | 0.0035 | 2.09 | all_v2.0.787.C2            | Pallidin (Pallid protein homolog) (Syntaxin 13-interacting protein).; n=1; Takifugu rubripes Rep: Pallidin (Pallid protein homolog) (Syntaxin 13-interacting protein). - Takifugu rubripes                                                                                                                           |
| 54850 | 4.00 | 0.19 | 0.0001 | 0.0023 | 2.08 | all_v2.0.2527.C1           | unclassified                                                                                                                                                                                                                                                                                                         |
| 51353 | 4.55 | 0.18 | 0.0001 | 0.0016 | 2.08 | all_v2.0.10898.C1          | unclassified                                                                                                                                                                                                                                                                                                         |
| 37197 | 5.40 | 0.14 | 0.0000 | 0.0013 | 2.08 | all_v2.0.12541.C1          | Fc11b09; n=4; Danio rerio Rep: Fc11b09 - Danio rerio (Zebrafish) (Brachydanio rerio)                                                                                                                                                                                                                                 |
| 36194 | 5.42 | 0.14 | 0.0000 | 0.0013 | 2.06 | all_v2.0.12049.C1          | Bloodthirsty; n=2; Notothenioidei Rep: Bloodthirsty - Chaenocephalus aceratus (White crocodile fish)                                                                                                                                                                                                                 |
| 37318 | 4.29 | 0.20 | 0.0001 | 0.0018 | 2.06 | all_v2.0.10149.C6          | Gamma-aminobutyric-acid receptor subunit alpha-1 precursor (GABA(A) receptor subunit alpha-1).; n=1; Takifugu rubripes Rep: Gamma-aminobutyric-acid receptor subunit alpha-1 precursor (GABA(A) receptor subunit alpha-1). - Takifugu rubripes                                                                       |
| 40187 | 4.41 | 0.19 | 0.0001 | 0.0017 | 2.06 | sb_gmapht_0020g02.pDNRm13r | PREDICTED: similar to actin-related protein 3-beta; n=1; Bos taurus Rep: PREDICTED: similar to actin-related protein 3-beta - Bos taurus                                                                                                                                                                             |

|       |      |      |        |        |      |                            |                                                                                                                                                                                                                                                                                                    |
|-------|------|------|--------|--------|------|----------------------------|----------------------------------------------------------------------------------------------------------------------------------------------------------------------------------------------------------------------------------------------------------------------------------------------------|
| 39327 | 4.44 | 0.18 | 0.0001 | 0.0017 | 2.06 | all_v2.0.12281.C1          | NFX1-type zinc finger-containing protein 1.; n=1; Takifugu rubripes Rep: NFX1-type zinc finger-containing protein 1 - Takifugu rubripes                                                                                                                                                            |
| 41565 | 3.89 | 0.20 | 0.0001 | 0.0025 | 2.06 | sb_gmnbhkc_002c04.pDNRF2   | Protein-tyrosine sulfotransferase 1; n=2; Danio rerio Rep: Protein-tyrosine sulfotransferase 1 - Brachydanio rerio (Zebrafish) (Danio rerio) Aminopeptidase N; n=2; Pseudopleuronectes americanus Rep: Aminopeptidase N - Pseudopleuronectes americanus (Winter flounder) (Pleuronectesamericanus) |
| 35894 | 5.40 | 0.13 | 0.0000 | 0.0013 | 2.05 | all_v2.0.16939.C1          |                                                                                                                                                                                                                                                                                                    |
| 52667 | 5.92 | 0.12 | 0.0000 | 0.0013 | 2.05 | all_v2.0.11918.C1          | unclassified                                                                                                                                                                                                                                                                                       |
| 38599 | 4.48 | 0.18 | 0.0001 | 0.0017 | 2.05 | all_v2.0.16145.C1          | unclassified                                                                                                                                                                                                                                                                                       |
| 48556 | 4.94 | 0.16 | 0.0000 | 0.0014 | 2.05 | sb_gmnbmd_002p01.pDNRm13r  | Unassigned protein                                                                                                                                                                                                                                                                                 |
| 49763 | 4.95 | 0.16 | 0.0000 | 0.0014 | 2.05 | all_v2.0.7999.C1           | unclassified                                                                                                                                                                                                                                                                                       |
| 39971 | 5.67 | 0.12 | 0.0000 | 0.0013 | 2.05 | all_v2.0.10807.C1          | phospholipase C delta 3; n=1; Takifugu rubripes Rep: phospholipase C delta 3 - Takifugu rubripes                                                                                                                                                                                                   |
| 41116 | 5.87 | 0.12 | 0.0000 | 0.0013 | 2.04 | all_v2.0.2090.C1           | PREDICTED: similar to transposase; n=1; Danio rerio Rep: PREDICTED: similar to transposase - Danio rerio                                                                                                                                                                                           |
| 48803 | 2.73 | 0.28 | 0.0018 | 0.0142 | 2.04 | sb_gmapte_006b21.pDNRF2    | Unassigned protein                                                                                                                                                                                                                                                                                 |
| 41628 | 4.15 | 0.19 | 0.0001 | 0.0020 | 2.03 | all_v2.0.10802.C1          | Putative helicase MOV-10 (EC 3.6.1.-) (Moloney leukemia virus 10 protein).; n=1; Takifugu rubripes Rep: Putative helicase MOV-10 (EC 3.6.1.-) (Moloney leukemia virus 10 protein). - Takifugu rubripes                                                                                             |
| 44545 | 2.99 | 0.28 | 0.0009 | 0.0088 | 2.02 | IRF1OK3                    | custom - Interferon regulatory factor 10K Zgc:55983; n=5; Danio rerio Rep: Zgc:55983 - Danio rerio (Zebrafish) (Brachydanio rerio)                                                                                                                                                                 |
| 43845 | 3.70 | 0.24 | 0.0002 | 0.0030 | 2.02 | all_v2.0.18770.C1          |                                                                                                                                                                                                                                                                                                    |
| 44641 | 4.59 | 0.16 | 0.0001 | 0.0016 | 2.02 | all_v2.0.3885.C1           | DEC-1_N domain containing protein                                                                                                                                                                                                                                                                  |
| 44372 | 2.68 | 0.31 | 0.0021 | 0.0156 | 2.02 | all_v2.0.2805.C3           | caspc; caspase c                                                                                                                                                                                                                                                                                   |
| 45349 | 5.37 | 0.13 | 0.0000 | 0.0013 | 2.02 | all_v2.0.16273.C1          | LOC793474; similar to stonustoxin alpha-subunit                                                                                                                                                                                                                                                    |
| 50731 | 3.52 | 0.24 | 0.0003 | 0.0038 | 2.01 | all_v2.0.17096.C1          | unclassified                                                                                                                                                                                                                                                                                       |
| 36994 | 3.01 | 0.28 | 0.0009 | 0.0085 | 2.01 | sb_gmnlkfta_002p12.t7      | EIF4G-related protein NAT1A; n=4; Danio rerio Rep: EIF4G-related protein NAT1A - Danio rerio (Zebrafish) (Brachydanio rerio) PREDICTED: similar to bloodthirsty; n=3; Danio rerio Rep: PREDICTED: similar to bloodthirsty - Danio rerio                                                            |
| 40263 | 8.16 | 0.07 | 0.0000 | 0.0012 | 2.01 | all_v2.0.661.C24           |                                                                                                                                                                                                                                                                                                    |
| 54894 | 4.49 | 0.18 | 0.0001 | 0.0017 | 2.01 | all_v2.0.2012.C2           | unclassified                                                                                                                                                                                                                                                                                       |
| 42930 | 2.85 | 0.26 | 0.0014 | 0.0114 | 2.01 | all_v2.0.1622.C1           | Ubiquitin-conjugating enzyme E2 L3; n=31; Euteleostomi Rep: Ubiquitin-conjugating enzyme E2 L3 - Homo sapiens (Human)                                                                                                                                                                              |
| 44911 | 4.11 | 0.18 | 0.0001 | 0.0021 | 2.01 | all_v2.0.3709.C2           | Ifi-6-16 multi-domain protein                                                                                                                                                                                                                                                                      |
| 48162 | 5.53 | 0.13 | 0.0000 | 0.0013 | 2.00 | sb_gmnlpbia_002b13.t7      | Unassigned protein                                                                                                                                                                                                                                                                                 |
| 46953 | 4.85 | 0.15 | 0.0001 | 0.0015 | 2.00 | sb_gmnbhkc_007o03.pDNRm13r | Unassigned protein                                                                                                                                                                                                                                                                                 |
| 47493 | 3.85 | 0.19 | 0.0002 | 0.0026 | 2.00 | sb_gmapht_0017g04.pDNRF2   | Unassigned protein                                                                                                                                                                                                                                                                                 |

|       |      |      |        |        |      |                             |                                                                                                                                                                                                                                                                                                                                                                                                                                                    |
|-------|------|------|--------|--------|------|-----------------------------|----------------------------------------------------------------------------------------------------------------------------------------------------------------------------------------------------------------------------------------------------------------------------------------------------------------------------------------------------------------------------------------------------------------------------------------------------|
| 47411 | 4.81 | 0.15 | 0.0001 | 0.0015 | 2.00 | sb_gmnlkic_0010i20.pDNRm13r | Unassigned protein                                                                                                                                                                                                                                                                                                                                                                                                                                 |
| 49575 | 3.15 | 0.31 | 0.0006 | 0.0066 | 1.99 | all_v2.0.3263.C1            | unclassified                                                                                                                                                                                                                                                                                                                                                                                                                                       |
| 52110 | 4.21 | 0.17 | 0.0001 | 0.0019 | 1.99 | all_v2.0.8876.C1            | unclassified<br>ATPase family AAA domain-containing protein 1-B; n=2; Danio rerio Rep: ATPase family AAA domain-containing protein 1-B - Danio rerio (Zebrafish) (Brachydanio rerio)                                                                                                                                                                                                                                                               |
| 36040 | 4.23 | 0.18 | 0.0001 | 0.0019 | 1.99 | all_v2.0.11287.C1           |                                                                                                                                                                                                                                                                                                                                                                                                                                                    |
| 47749 | 4.63 | 0.15 | 0.0001 | 0.0016 | 1.99 | sb_gmnbmu_0003o07.pDNRf2    | Unassigned protein<br>Homolog of Homo sapiens Hemicentin; n=1; Takifugu rubripes Rep: Homolog of Homo sapiens Hemicentin - Takifugu rubripes                                                                                                                                                                                                                                                                                                       |
| 38095 | 4.45 | 0.17 | 0.0001 | 0.0017 | 1.99 | all_v2.0.6540.C1            | PREDICTED: similar to sodium channel associated protein 1A; n=1;<br>Strongylocentrotus purpuratus Rep: PREDICTED: similar to sodium channel associated protein 1A - Strongylocentrotus purpuratus                                                                                                                                                                                                                                                  |
| 41020 | 3.90 | 0.19 | 0.0001 | 0.0025 | 1.99 | all_v2.0.6042.C1            |                                                                                                                                                                                                                                                                                                                                                                                                                                                    |
| 50655 | 4.44 | 0.16 | 0.0001 | 0.0017 | 1.98 | all_v2.0.5679.C1            | unclassified                                                                                                                                                                                                                                                                                                                                                                                                                                       |
| 42555 | 5.36 | 0.13 | 0.0000 | 0.0014 | 1.98 | sb_gmlbgits_0003f16.sp6     | Tho2; n=5; Danio rerio Rep: Tho2 - Danio rerio (Zebrafish) (Brachydanio rerio)                                                                                                                                                                                                                                                                                                                                                                     |
| 44598 | 6.07 | 0.11 | 0.0000 | 0.0013 | 1.98 | STAT14                      | custom - Signal transducer and activator of transcription 1                                                                                                                                                                                                                                                                                                                                                                                        |
| 53704 | 2.59 | 0.31 | 0.0026 | 0.0178 | 1.98 | all_v2.0.1006.C1            | unclassified                                                                                                                                                                                                                                                                                                                                                                                                                                       |
| 40019 | 3.07 | 0.30 | 0.0008 | 0.0077 | 1.98 | sb_gmnbhkas_0006d14.pDNRf2  | Pol polyprotein; n=2; Walleye epidermal hyperplasia virus 2 Rep: Pol polyprotein - Walleye epidermal hyperplasia virus 2                                                                                                                                                                                                                                                                                                                           |
| 44713 | 3.61 | 0.20 | 0.0002 | 0.0034 | 1.98 | all_v2.0.8260.C1            | DUF1777 multi-domain protein<br>PREDICTED: similar to Ubiquitin carboxyl-terminal hydrolase 5 (Ubiquitin thioesterase 5) (Ubiquitin-specific-processing protease 5) (Deubiquitinating enzyme 5) (Isopeptidase T); n=2; Homo/Pan/Gorilla group Rep: PREDICTED: similar to Ubiquitin carboxyl-terminal hydrolase 5 (Ubiquitin thioesterase 5) (Ubiquitin-specific-processing protease 5) (Deubiquitinating enzyme 5) (Isopeptidase T) - Homo sapiens |
| 41181 | 3.76 | 0.22 | 0.0002 | 0.0029 | 1.97 | all_v2.0.14519.C1           | PREDICTED: similar to CDK2 (cyclin-dependent kinase 2)-associated protein 1; n=2; Canis lupus familiaris Rep: PREDICTED: similar to CDK2 (cyclin-dependent kinase 2)-associated protein 1 - Canis familiaris                                                                                                                                                                                                                                       |
| 40304 | 4.17 | 0.17 | 0.0001 | 0.0020 | 1.97 | all_v2.0.2720.C1            | Serine/threonine-protein kinase Chk2 (EC 2.7.11.1) (Cds1); n=1; Takifugu rubripes Rep: Serine/threonine-protein kinase Chk2 (EC 2.7.11.1) (Cds1) - Takifugu rubripes                                                                                                                                                                                                                                                                               |
| 42085 | 2.89 | 0.25 | 0.0012 | 0.0105 | 1.97 | all_v2.0.889.C1             |                                                                                                                                                                                                                                                                                                                                                                                                                                                    |
| 52069 | 4.32 | 0.17 | 0.0001 | 0.0018 | 1.96 | all_v2.0.6954.C2            | unclassified<br>Novel protein; n=2; Danio rerio Rep: Novel protein - Danio rerio (Zebrafish) (Brachydanio rerio)                                                                                                                                                                                                                                                                                                                                   |
| 39626 | 6.77 | 0.09 | 0.0000 | 0.0012 | 1.96 | all_v2.0.4.CB27             | NADH dehydrogenase (Ubiquinone) flavoprotein 1; n=3; Clupeocephala Rep: NADH dehydrogenase (Ubiquinone) flavoprotein 1 - Danio rerio (Zebrafish) (Brachydanio rerio)                                                                                                                                                                                                                                                                               |
| 39251 | 4.94 | 0.13 | 0.0000 | 0.0014 | 1.95 | all_v2.0.4751.C2            |                                                                                                                                                                                                                                                                                                                                                                                                                                                    |

|       |      |      |        |        |      |                            |                                                                                                                                                                                                                                                                                                                                                                                                                                                                                                                                                                                    |
|-------|------|------|--------|--------|------|----------------------------|------------------------------------------------------------------------------------------------------------------------------------------------------------------------------------------------------------------------------------------------------------------------------------------------------------------------------------------------------------------------------------------------------------------------------------------------------------------------------------------------------------------------------------------------------------------------------------|
| 41936 | 3.46 | 0.22 | 0.0003 | 0.0041 | 1.95 | all_v2.0.7491.C3           | RING finger protein 213.; n=1; Gallus gallus Rep: RING finger protein 213 - Gallus gallus                                                                                                                                                                                                                                                                                                                                                                                                                                                                                          |
| 41491 | 6.55 | 0.09 | 0.0000 | 0.0012 | 1.95 | all_v2.0.871.C1            | Protein mago nashi homolog 2; n=25; Coelomata Rep: Protein mago nashi homolog 2 - Homo sapiens (Human)<br>Voltage-dependent N-type calcium channel subunit alpha-1B (Voltage-gated calcium channel subunit alpha Cav2.2) (Calcium channel, L type, alpha-1 polypeptide isoform 5) (Brain calcium channel III) (BIII).; n=1; Takifugu rubripes Rep: Voltage-dependent N-type calcium channel subunit alpha-1B (Voltage-gated calcium channel subunit alpha Cav2.2) (Calcium channel, L type, alpha-1 polypeptide isoform 5) (Brain calcium channel III) (BIII). - Takifugu rubripes |
| 43221 | 4.04 | 0.19 | 0.0001 | 0.0022 | 1.95 | all_v2.0.10924.C1          | Eif4a1b protein; n=2; Danio rerio Rep: Eif4a1b protein - Danio rerio (Zebrafish) (Brachydanio rerio)                                                                                                                                                                                                                                                                                                                                                                                                                                                                               |
| 36988 | 4.44 | 0.16 | 0.0001 | 0.0017 | 1.95 | all_v2.0.3557.C1           | LOC428660; similar to very large inducible GTPase-1                                                                                                                                                                                                                                                                                                                                                                                                                                                                                                                                |
| 45068 | 4.40 | 0.16 | 0.0001 | 0.0017 | 1.94 | all_v2.0.16837.C1          | unclassified                                                                                                                                                                                                                                                                                                                                                                                                                                                                                                                                                                       |
| 51421 | 5.35 | 0.12 | 0.0000 | 0.0014 | 1.94 | all_v2.0.4626.C1           | HERC5, LOC478474; hect domain and RLD 5                                                                                                                                                                                                                                                                                                                                                                                                                                                                                                                                            |
| 44865 | 6.05 | 0.10 | 0.0000 | 0.0013 | 1.94 | all_v2.0.8362.C1           | unclassified                                                                                                                                                                                                                                                                                                                                                                                                                                                                                                                                                                       |
| 52910 | 4.40 | 0.16 | 0.0001 | 0.0017 | 1.94 | all_v2.0.999.C1            | N-myc-interactor (Nmi) (N-myc and STAT interactor).; n=1; Takifugu rubripes Rep: N-myc-interactor (Nmi) (N-myc and STAT interactor). - Takifugu rubripes                                                                                                                                                                                                                                                                                                                                                                                                                           |
| 39348 | 3.38 | 0.20 | 0.0004 | 0.0046 | 1.94 | all_v2.0.3973.C2           | CD9 protein; n=1; Oncorhynchus mykiss Rep: CD9 protein - Oncorhynchus mykiss (Rainbow trout) (Salmo gairdneri)                                                                                                                                                                                                                                                                                                                                                                                                                                                                     |
| 36407 | 6.64 | 0.09 | 0.0000 | 0.0012 | 1.93 | all_v2.0.1864.C7           | Unassigned protein                                                                                                                                                                                                                                                                                                                                                                                                                                                                                                                                                                 |
| 47299 | 4.49 | 0.16 | 0.0001 | 0.0017 | 1.93 | sb_gmnbhkc_0005d21.pDNRF2  | unclassified                                                                                                                                                                                                                                                                                                                                                                                                                                                                                                                                                                       |
| 51818 | 4.71 | 0.15 | 0.0001 | 0.0015 | 1.93 | all_v2.0.11455.C1          | Cell division cycle 42; n=12; Coelomata Rep: Cell division cycle 42 - Danio rerio (Zebrafish) (Brachydanio rerio)                                                                                                                                                                                                                                                                                                                                                                                                                                                                  |
| 36426 | 3.72 | 0.19 | 0.0002 | 0.0029 | 1.93 | all_v2.0.8306.C2           | custom - double-stranded RNA-dependent protein kinase A                                                                                                                                                                                                                                                                                                                                                                                                                                                                                                                            |
| 44503 | 4.02 | 0.18 | 0.0001 | 0.0022 | 1.93 | PKRvA2                     | PREDICTED: similar to transposase; n=1; Danio rerio Rep: PREDICTED: similar to transposase - Danio rerio                                                                                                                                                                                                                                                                                                                                                                                                                                                                           |
| 41109 | 4.87 | 0.14 | 0.0001 | 0.0014 | 1.92 | sb_gmnbmd_0005c12.pDNRm13r | Probable ATP-dependent helicase LGP2 (EC 3.6.1.-) (Protein D11Lgp2 homolog).; n=1; Takifugu rubripes Rep: Probable ATP-dependent helicase LGP2 (EC 3.6.1.-) (Protein D11Lgp2 homolog). - Takifugu rubripes                                                                                                                                                                                                                                                                                                                                                                         |
| 41315 | 2.76 | 0.30 | 0.0017 | 0.0134 | 1.92 | all_v2.0.5598.C2           | Homolog of Gallus gallus Voltage-dependent anion channel.; n=1; Takifugu rubripes Rep: Homolog of Gallus gallus Voltage-dependent anion channel. - Takifugu rubripes                                                                                                                                                                                                                                                                                                                                                                                                               |
| 37946 | 2.91 | 0.30 | 0.0011 | 0.0102 | 1.92 | all_v2.0.2234.C1           | Homolog of Homo sapiens Mucin 2 precursor; n=1; Takifugu rubripes Rep: Homolog of Homo sapiens Mucin 2 precursor - Takifugu rubripes                                                                                                                                                                                                                                                                                                                                                                                                                                               |
| 38178 | 5.46 | 0.12 | 0.0000 | 0.0013 | 1.91 | all_v2.0.14775.C1          | Homolog of Homo sapiens SOUL protein; n=1; Takifugu rubripes Rep: Homolog of Homo sapiens SOUL protein - Takifugu rubripes                                                                                                                                                                                                                                                                                                                                                                                                                                                         |
| 38352 | 4.95 | 0.13 | 0.0000 | 0.0014 | 1.90 | all_v2.0.272.C2            | Homolog of Homo sapiens SOUL protein - Takifugu rubripes                                                                                                                                                                                                                                                                                                                                                                                                                                                                                                                           |

|       |      |      |        |        |      |                             |                                                                                                                                                                                                                                                                                                                                                         |
|-------|------|------|--------|--------|------|-----------------------------|---------------------------------------------------------------------------------------------------------------------------------------------------------------------------------------------------------------------------------------------------------------------------------------------------------------------------------------------------------|
| 42922 | 5.43 | 0.11 | 0.0000 | 0.0013 | 1.90 | sb_gmnlpras_0001f12.t7      | Ubiquitin; n=6; Eukaryota Rep: Ubiquitin - Tetrahymena pyriformis<br>Transglutaminase; n=1; Oreochromis niloticus Rep: Transglutaminase - Oreochromis niloticus (Nile tilapia) (Tilapia nilotica)                                                                                                                                                       |
| 42678 | 4.33 | 0.15 | 0.0001 | 0.0018 | 1.90 | all_v2.0.9799.C2            | UPI0000D8BA1C related cluster; n=1; Danio rerio Rep: UPI0000D8BA1C UniRef100 entry - Danio rerio                                                                                                                                                                                                                                                        |
| 43012 | 5.77 | 0.10 | 0.0000 | 0.0013 | 1.90 | all_v2.0.9212.C1            |                                                                                                                                                                                                                                                                                                                                                         |
| 49141 | 4.05 | 0.17 | 0.0001 | 0.0022 | 1.90 | all_v2.0.14559.C1           | unclassified                                                                                                                                                                                                                                                                                                                                            |
| 49317 | 4.89 | 0.13 | 0.0001 | 0.0014 | 1.90 | all_v2.0.13805.C1           | unclassified                                                                                                                                                                                                                                                                                                                                            |
| 38891 | 3.13 | 0.22 | 0.0007 | 0.0069 | 1.90 | all_v2.0.1124.C3            | Lysyl-tRNA synthetase; n=3; Danio rerio Rep: Lysyl-tRNA synthetase - Danio rerio (Zebrafish) (Brachydanio rerio) Homolog of Homo sapiens Vacuolar sorting protein 54 long isoform; n=1; Takifugu rubripes Rep: Homolog of Homo sapiens Vacuolar sorting protein 54 long isoform - Takifugu rubripes                                                     |
| 38436 | 5.31 | 0.12 | 0.0000 | 0.0014 | 1.90 | sb_gmapov_0005h22.pDNRF2    | Novel protein similar to vertebrate ATPase, H <sup>+</sup> transporting, lysosomal V0 subunit a isoform 2; n=3; Danio rerio Rep: Novel protein similar to vertebrate ATPase, H <sup>+</sup> transporting, lysosomal V0 subunit a isoform 2 - Brachydanio rerio (Zebrafish) (Danio rerio)                                                                |
| 39454 | 4.77 | 0.14 | 0.0001 | 0.0015 | 1.90 | sb_gmapov_0007h10.pDNRF2    |                                                                                                                                                                                                                                                                                                                                                         |
| 53326 | 2.66 | 0.26 | 0.0022 | 0.0160 | 1.90 | all_v2.0.9151.C1            | unclassified                                                                                                                                                                                                                                                                                                                                            |
| 45375 | 4.10 | 0.17 | 0.0001 | 0.0021 | 1.89 | sb_gmnbmu_0008h11.pDNRF2    | Macro domain containing protein                                                                                                                                                                                                                                                                                                                         |
| 46296 | 3.86 | 0.18 | 0.0002 | 0.0026 | 1.89 | sb_gmnbhkc_0001i02.pDNRF2   | ST7 domain containing protein                                                                                                                                                                                                                                                                                                                           |
| 45146 | 5.24 | 0.11 | 0.0000 | 0.0014 | 1.89 | sb_gmnbhkc_0005i22.pDNRM13r | LOC555735; similar to DNA methyltransferase<br>Dual specificity protein phosphatase 21 (EC 3.1.3.48) (EC 3.1.3.16) (Low molecular weight dual specificity phosphatase 21).; n=1; Takifugu rubripes Rep: Dual specificity protein phosphatase 21 (EC 3.1.3.48) (EC 3.1.3.16) (Low molecular weight dual specificity phosphatase 21). - Takifugu rubripes |
| 36949 | 2.69 | 0.28 | 0.0020 | 0.0151 | 1.89 | all_v2.0.3352.C2            | custom - caspase 8, apoptosis-related cysteine peptidase                                                                                                                                                                                                                                                                                                |
| 44434 | 4.70 | 0.14 | 0.0001 | 0.0015 | 1.89 | CASP82                      |                                                                                                                                                                                                                                                                                                                                                         |
| 44509 | 4.08 | 0.16 | 0.0001 | 0.0021 | 1.88 | PKRvB5                      | custom - double-stranded RNA-dependent protein kinase B<br>UPI0000D8C4C4 related cluster; n=2; Danio rerio Rep: UPI0000D8C4C4 UniRef100 entry - Danio rerio                                                                                                                                                                                             |
| 43029 | 3.72 | 0.20 | 0.0002 | 0.0029 | 1.88 | sb_gmapht_0005e07.pDNRF2    |                                                                                                                                                                                                                                                                                                                                                         |
| 51332 | 5.02 | 0.13 | 0.0000 | 0.0014 | 1.88 | all_v2.0.4629.C1            | unclassified                                                                                                                                                                                                                                                                                                                                            |
| 47248 | 2.67 | 0.38 | 0.0022 | 0.0159 | 1.88 | all_v2.0.3503.C1            | Unassigned protein                                                                                                                                                                                                                                                                                                                                      |
| 41526 | 4.50 | 0.15 | 0.0001 | 0.0017 | 1.88 | sb_gmapte_0011n16.pDNRF2    | Protein ripply1; n=2; Danio rerio Rep: Protein ripply1 - Danio rerio (Zebrafish) (Brachydanio rerio)<br>PREDICTED: similar to Poly [ADP-ribose] polymerase 14 (PARP-14) (B aggressive lymphoma protein 2); n=1; Danio rerio Rep: PREDICTED: similar to Poly [ADP-ribose] polymerase 14 (PARP-14) (B aggressive lymphoma protein 2) - Danio rerio        |
| 40844 | 5.49 | 0.11 | 0.0000 | 0.0013 | 1.88 | all_v2.0.8322.C3            |                                                                                                                                                                                                                                                                                                                                                         |
| 45719 | 2.85 | 0.27 | 0.0013 | 0.0114 | 1.88 | all_v2.0.15866.C1.a         | non-directed                                                                                                                                                                                                                                                                                                                                            |



|       |      |      |        |        |      |                              |                                                                                                                                                                                                                          |
|-------|------|------|--------|--------|------|------------------------------|--------------------------------------------------------------------------------------------------------------------------------------------------------------------------------------------------------------------------|
| 53053 | 4.58 | 0.14 | 0.0001 | 0.0016 | 1.88 | all_v2.0.393.C1              | unclassified                                                                                                                                                                                                             |
| 47291 | 6.55 | 0.08 | 0.0000 | 0.0012 | 1.87 | all_v2.0.606.C2              | Unassigned protein                                                                                                                                                                                                       |
| 41395 | 3.88 | 0.17 | 0.0002 | 0.0025 | 1.87 | all_v2.0.7668.C1             | prospero homeobox 2; n=1; Takifugu rubripes Rep: prospero homeobox 2 - Takifugu rubripes                                                                                                                                 |
| 36797 | 5.23 | 0.11 | 0.0000 | 0.0014 | 1.87 | all_v2.0.2166.C2             | Cytotoxic and regulatory T cell protein; n=1; Oncorhynchus mykiss Rep: Cytotoxic and regulatory T cell protein - Oncorhynchus mykiss (Rainbow trout) (Salmo gairdneri)                                                   |
| 40875 | 2.71 | 0.28 | 0.0019 | 0.0147 | 1.86 | sb_gmnbhkc_0015m19.pDNRm13r  | PREDICTED: similar to protein BAP28 (FLJ10359); n=1; Monodelphis domestica Rep: PREDICTED: similar to protein BAP28 (FLJ10359) - Monodelphis domestica                                                                   |
| 42292 | 4.20 | 0.16 | 0.0001 | 0.0020 | 1.86 | sb_gmnbbr_0003o15.pDNRf2     | Solute carrier family 25 (Carnitine/acylcarnitine translocase), member 20; n=1; Danio rerio Rep: Solute carrier family 25 (Carnitine/acylcarnitine translocase), member 20 - Brachydanio rerio (Zebrafish) (Danio rerio) |
| 51931 | 3.48 | 0.20 | 0.0003 | 0.0040 | 1.86 | all_v2.0.6205.C1             | unclassified                                                                                                                                                                                                             |
| 49851 | 3.02 | 0.27 | 0.0009 | 0.0084 | 1.86 | all_v2.0.2837.C3             | unclassified                                                                                                                                                                                                             |
| 40721 | 2.60 | 0.29 | 0.0026 | 0.0176 | 1.86 | sb_gmnbpcic_0001i03.pDNRf2   | PREDICTED: similar to Nitric oxide synthase trafficker; n=1; Danio rerio Rep: PREDICTED: similar to Nitric oxide synthase trafficker - Danio rerio                                                                       |
| 41414 | 5.04 | 0.12 | 0.0000 | 0.0014 | 1.86 | sb_gmnlstfc_0008p05.t7       | Proteasome subunit alpha type 6-like protein; n=1; Xenopsylla cheopis Rep: Proteasome subunit alpha type 6-like protein - Xenopsylla cheopis (oriental rat flea)                                                         |
| 41104 | 4.07 | 0.17 | 0.0001 | 0.0021 | 1.86 | all_v2.0.11473.C1            | PREDICTED: similar to transposase, partial; n=2; Strongylocentrotus purpuratus Rep: PREDICTED: similar to transposase, partial - Strongylocentrotus purpuratus                                                           |
| 41047 | 2.78 | 0.31 | 0.0016 | 0.0127 | 1.85 | sb_gmapht_0032p07.pDNRm13r   | PREDICTED: similar to stonustoxin alpha-subunit; n=3; Danio rerio Rep: PREDICTED: similar to stonustoxin alpha-subunit - Danio rerio                                                                                     |
| 54199 | 2.87 | 0.26 | 0.0013 | 0.0110 | 1.85 | all_v2.0.7185.C1             | unclassified                                                                                                                                                                                                             |
| 40337 | 3.96 | 0.17 | 0.0001 | 0.0023 | 1.85 | sb_gmnlbric_0003k18.t7       | PREDICTED: similar to cGMP phosphodiesterase A2; n=1; Ornithorhynchus anatinus Rep: PREDICTED: similar to cGMP phosphodiesterase A2 - Ornithorhynchus anatinus                                                           |
| 54583 | 2.80 | 0.28 | 0.0015 | 0.0124 | 1.85 | all_v2.0.1321.C2             | unclassified                                                                                                                                                                                                             |
| 47434 | 2.43 | 0.28 | 0.0041 | 0.0239 | 1.85 | sb_gmnbhkas_0017h13.pDNRm13r | Unassigned protein                                                                                                                                                                                                       |
| 43297 | 4.96 | 0.12 | 0.0000 | 0.0014 | 1.84 | all_v2.0.11507.C2            | Zgc:101040; n=1; Danio rerio Rep: Zgc:101040 - Danio rerio (Zebrafish) (Brachydanio rerio)                                                                                                                               |
| 39658 | 3.02 | 0.24 | 0.0008 | 0.0083 | 1.84 | all_v2.0.5240.C2             | Novel protein; n=3; Danio rerio Rep: Novel protein - Danio rerio (Zebrafish) (Brachydanio rerio)                                                                                                                         |
| 45753 | 3.22 | 0.22 | 0.0005 | 0.0059 | 1.84 | all_v2.0.4658.C1.a           | non-directed                                                                                                                                                                                                             |
| 55314 | 4.74 | 0.13 | 0.0001 | 0.0015 | 1.83 | all_v2.0.4690.C2             | unclassified                                                                                                                                                                                                             |
| 45838 | 3.64 | 0.19 | 0.0002 | 0.0032 | 1.83 | all_v2.0.13440.C1            | non-directed                                                                                                                                                                                                             |
| 35725 | 4.65 | 0.13 | 0.0001 | 0.0015 | 1.83 | all_v2.0.15785.C1            | Abhydrolase domain containing 4; n=2;                                                                                                                                                                                    |

|       |      |      |        |        |      |                               |                                                                                                                                                                                                                                                                                                                          |
|-------|------|------|--------|--------|------|-------------------------------|--------------------------------------------------------------------------------------------------------------------------------------------------------------------------------------------------------------------------------------------------------------------------------------------------------------------------|
|       |      |      |        |        |      | C1                            | Danio rerio Rep: Abhydrolase domain containing 4 - Danio rerio (Zebrafish) (Brachydanio rerio)<br>PREDICTED: similar to 5-amp-activated protein kinase, beta subunit; n=1; Strongylocentrotus purpuratus Rep: PREDICTED: similar to 5-amp-activated protein kinase, beta subunit - Strongylocentrotus purpuratus         |
| 40171 | 3.41 | 0.22 | 0.0003 | 0.0044 | 1.83 | sb_gmnbhkas_0001a01.pDNRF2    |                                                                                                                                                                                                                                                                                                                          |
| 47211 | 2.49 | 0.30 | 0.0034 | 0.0213 | 1.82 | all_v2.0.8780.C1              | Unassigned protein<br>NADH dehydrogenase (Ubiquinone) 1 beta subcomplex, 10; n=2; Danio rerio Rep: NADH dehydrogenase (Ubiquinone) 1 beta subcomplex, 10 - Danio rerio (Zebrafish) (Brachydanio rerio)                                                                                                                   |
| 39246 | 3.54 | 0.18 | 0.0003 | 0.0037 | 1.82 | all_v2.0.7214.C1              | MGC69539 protein; n=2; Xenopus Rep: MGC69539 protein - Xenopus tropicalis (Western clawed frog) (Silurana tropicalis) pfkp; phosphofructokinase, platelet [EC:2.7.1.11]; K00850 6-phosphofructokinase<br>Zgc:112064; n=4; Danio rerio Rep: Zgc:112064 - Danio rerio (Zebrafish) (Brachydanio rerio)                      |
| 39011 | 2.61 | 0.27 | 0.0026 | 0.0176 | 1.82 | sb_gmapht_0006h11.pDNRF2      |                                                                                                                                                                                                                                                                                                                          |
| 45986 | 5.92 | 0.09 | 0.0000 | 0.0013 | 1.82 | all_v2.0.10798.C1             |                                                                                                                                                                                                                                                                                                                          |
| 43487 | 4.96 | 0.12 | 0.0000 | 0.0014 | 1.82 | all_v2.0.5034.C1              |                                                                                                                                                                                                                                                                                                                          |
| 47368 | 5.87 | 0.09 | 0.0000 | 0.0013 | 1.81 | sb_gmnl1a_0036m01.t7          | Unassigned protein<br>Alkylated repair protein alkB homolog 5; n=2; Gallus gallus Rep: Alkylated repair protein alkB homolog 5 - Gallus gallus                                                                                                                                                                           |
| 35854 | 4.90 | 0.12 | 0.0001 | 0.0014 | 1.81 | all_v2.0.1645.C1              |                                                                                                                                                                                                                                                                                                                          |
| 50348 | 3.66 | 0.18 | 0.0002 | 0.0032 | 1.81 | all_v2.0.9352.C1              | unclassified<br>Ribosomal protein L5b; n=1; Ictalurus punctatus Rep: Ribosomal protein L5b - Ictalurus punctatus (Channel catfish)                                                                                                                                                                                       |
| 41899 | 4.72 | 0.13 | 0.0001 | 0.0015 | 1.81 | all_v2.0.16108.C1             |                                                                                                                                                                                                                                                                                                                          |
| 51453 | 3.98 | 0.17 | 0.0001 | 0.0023 | 1.81 | all_v2.0.1144.C1              | unclassified<br>Homolog of Brachydanio rerio Cyclin L ania-6a.; n=2; Takifugu rubripes Rep: Homolog of Brachydanio rerio Cyclin L ania-6a. - Takifugu rubripes<br>Cathepsin L; n=2; Percomorpha Rep: Cathepsin L - Lates calcarifer (Barramundi)                                                                         |
| 37698 | 5.19 | 0.10 | 0.0000 | 0.0014 | 1.81 | sb_gmnbpcic_0001e04.pDNRFm13r |                                                                                                                                                                                                                                                                                                                          |
| 36366 | 3.85 | 0.16 | 0.0002 | 0.0026 | 1.81 | all_v2.0.1055.C1              | PREDICTED: similar to MGC81823 protein isoform 1; n=2; Strongylocentrotus purpuratus Rep: PREDICTED: similar to MGC81823 protein isoform 1 - Strongylocentrotus purpuratus<br>Putative methyltransferase METT10D; n=3; Danio rerio Rep: Putative methyltransferase METT10D - Danio rerio (Zebrafish) (Brachydanio rerio) |
| 40660 | 2.55 | 0.29 | 0.0029 | 0.0192 | 1.80 | sb_gmnlpbia_0002a22.t7        |                                                                                                                                                                                                                                                                                                                          |
| 41633 | 5.46 | 0.10 | 0.0000 | 0.0013 | 1.80 | sb_gmnbpic_0007m23.pDNRF2     |                                                                                                                                                                                                                                                                                                                          |
| 48076 | 3.29 | 0.21 | 0.0005 | 0.0053 | 1.80 | sb_gmnbpic_0005b22.pDNRF2     | Unassigned protein<br>Zgc:152953; n=2; Danio rerio Rep: Zgc:152953 - Danio rerio (Zebrafish) (Brachydanio rerio)                                                                                                                                                                                                         |
| 43642 | 4.33 | 0.14 | 0.0001 | 0.0018 | 1.80 | all_v2.0.5071.C1              |                                                                                                                                                                                                                                                                                                                          |
| 50281 | 2.51 | 0.30 | 0.0033 | 0.0209 | 1.80 | all_v2.0.7444.C1              | unclassified                                                                                                                                                                                                                                                                                                             |
| 53852 | 3.70 | 0.18 | 0.0002 | 0.0030 | 1.80 | all_v2.0.6339.C1              | unclassified<br>GRP58; glucose regulated protein 58kD [EC:5.3.4.1]; K08056 protein disulfide isomerase family A, member 3                                                                                                                                                                                                |
| 44839 | 2.92 | 0.26 | 0.0011 | 0.0100 | 1.79 | all_v2.0.5182.C2              |                                                                                                                                                                                                                                                                                                                          |
| 50391 | 5.67 | 0.09 | 0.0000 | 0.0013 | 1.79 | all_v2.0.2069.C2              | unclassified                                                                                                                                                                                                                                                                                                             |
| 37904 | 3.62 | 0.18 | 0.0002 | 0.0033 | 1.79 | sb_gmnbbrts_0                 | Homolog of Gallus gallus Double-                                                                                                                                                                                                                                                                                         |

|       |      |      |        |        |      |                                      |                                                                                                                                                                                                                                                                                                                                                                         |
|-------|------|------|--------|--------|------|--------------------------------------|-------------------------------------------------------------------------------------------------------------------------------------------------------------------------------------------------------------------------------------------------------------------------------------------------------------------------------------------------------------------------|
|       |      |      |        |        |      | 003k13.pDNRF<br>2                    | stranded RNA-activated protein kinase.; n=1; Takifugu rubripes Rep: Homolog of Gallus gallus Double-stranded RNA-activated protein kinase. - Takifugu rubripes                                                                                                                                                                                                          |
| 44396 | 2.72 | 0.24 | 0.0019 | 0.0145 | 1.79 | all_v2.0.6100.C<br>1                 | CHCHD5; coiled-coil-helix-coiled-coil-helix domain containing 5<br>Zgc:103426; n=2; Danio rerio Rep: Zgc:103426 - Danio rerio (Zebrafish) (Brachydanio rerio)                                                                                                                                                                                                           |
| 43362 | 4.26 | 0.14 | 0.0001 | 0.0019 | 1.79 | sb_gmnbm_u0<br>12l15.pDNRF2          |                                                                                                                                                                                                                                                                                                                                                                         |
| 52340 | 4.96 | 0.11 | 0.0000 | 0.0014 | 1.78 | all_v2.0.3337.C<br>1                 | unclassified                                                                                                                                                                                                                                                                                                                                                            |
| 46157 | 2.47 | 0.35 | 0.0037 | 0.0223 | 1.78 | sb_gmnbhkas_0<br>009m02.pDNR<br>m13r | RGD1564081_predicted; similar to novel protein similar to human oligophrenin 1 (OPHN1) (predicted)                                                                                                                                                                                                                                                                      |
| 44355 | 2.78 | 0.23 | 0.0016 | 0.0127 | 1.78 | sb_gmnblits_00<br>09a24.pDNRm1<br>3r | Caldesmon domain containing protein<br>PREDICTED: similar to Poly [ADP-ribose] polymerase 14 (PARP-14) (B aggressive lymphoma protein 2); n=1; Danio rerio Rep: PREDICTED: similar to Poly [ADP-ribose] polymerase 14 (PARP-14) (B aggressive lymphoma protein 2) - Danio rerio                                                                                         |
| 40847 | 4.70 | 0.12 | 0.0001 | 0.0015 | 1.78 | all_v2.0.8322.C<br>1                 |                                                                                                                                                                                                                                                                                                                                                                         |
| 49782 | 4.42 | 0.14 | 0.0001 | 0.0017 | 1.78 | all_v2.0.17197.<br>C1                | unclassified                                                                                                                                                                                                                                                                                                                                                            |
| 46402 | 4.79 | 0.11 | 0.0001 | 0.0015 | 1.78 | sb_gmapht_000<br>4b19.pDNRm1<br>3r   | TTN; cardiac titin                                                                                                                                                                                                                                                                                                                                                      |
| 45976 | 3.28 | 0.19 | 0.0005 | 0.0054 | 1.77 | sb_gmnlkfta_00<br>07d22.t7           | pbe1; pre-B-cell colony enhancing factor 1                                                                                                                                                                                                                                                                                                                              |
| 39321 | 3.36 | 0.18 | 0.0004 | 0.0047 | 1.77 | all_v2.0.6027.C<br>5                 | NFX1-type zinc finger-containing protein 1.; n=1; Takifugu rubripes Rep: NFX1-type zinc finger-containing protein 1 - Takifugu rubripes<br>PREDICTED: similar to mKIAA1931 protein; n=1; Monodelphis domestica Rep: PREDICTED: similar to mKIAA1931 protein - Monodelphis domestica                                                                                     |
| 40679 | 3.71 | 0.16 | 0.0002 | 0.0030 | 1.77 | all_v2.0.4387.C<br>1                 |                                                                                                                                                                                                                                                                                                                                                                         |
| 45352 | 3.15 | 0.19 | 0.0006 | 0.0067 | 1.77 | sb_gmnbmd_00<br>07i19.pDNRF2         | LOC793817; similar to pol polyprotein Zgc:163136 protein; n=1; Danio rerio Rep: Zgc:163136 protein - Danio rerio (Zebrafish) (Brachydanio rerio)                                                                                                                                                                                                                        |
| 43795 | 3.63 | 0.16 | 0.0002 | 0.0033 | 1.77 | all_v2.0.2978.C<br>1                 |                                                                                                                                                                                                                                                                                                                                                                         |
| 53004 | 5.48 | 0.09 | 0.0000 | 0.0013 | 1.77 | all_v2.0.547.C1                      | unclassified<br>Viperin-like protein; n=1; Channa argus Rep: Viperin-like protein - Channa argus                                                                                                                                                                                                                                                                        |
| 43200 | 4.42 | 0.13 | 0.0001 | 0.0017 | 1.77 | sb_gmnlsfic_00<br>02a03.t7           |                                                                                                                                                                                                                                                                                                                                                                         |
| 50754 | 5.59 | 0.09 | 0.0000 | 0.0013 | 1.77 | all_v2.0.5172.C<br>1                 | unclassified<br>Zgc:103420; n=3; Cyprinidae Rep: Zgc:103420 - Danio rerio (Zebrafish) (Brachydanio rerio)                                                                                                                                                                                                                                                               |
| 43361 | 3.34 | 0.18 | 0.0004 | 0.0049 | 1.77 | all_v2.0.2975.C<br>2                 |                                                                                                                                                                                                                                                                                                                                                                         |
| 44956 | 4.11 | 0.14 | 0.0001 | 0.0021 | 1.77 | all_v2.0.18221.<br>C1                | KRAS, LOC418207; v-Ki-ras2 Kirsten rat sarcoma viral oncogene homolog; K07827 GTPase Kras<br>Single-stranded DNA-binding protein, mitochondrial precursor (Mt-SSB) (MtSSB) (PWP1-interacting protein 17).; n=1; Takifugu rubripes Rep: Single-stranded DNA-binding protein, mitochondrial precursor (Mt-SSB) (MtSSB) (PWP1-interacting protein 17). - Takifugu rubripes |
| 42223 | 3.30 | 0.20 | 0.0004 | 0.0053 | 1.77 | all_v2.0.3958.C<br>1                 |                                                                                                                                                                                                                                                                                                                                                                         |
| 55446 | 2.93 | 0.22 | 0.0011 | 0.0098 | 1.77 | sb_gmapov_001<br>7j09.pDNRF2         | USP22, USP3L; ubiquitin specific peptidase 22                                                                                                                                                                                                                                                                                                                           |
| 48129 | 3.42 | 0.18 | 0.0003 | 0.0043 | 1.77 | all_v2.0.14003.<br>C1                | Unassigned protein                                                                                                                                                                                                                                                                                                                                                      |

|       |      |      |        |        |      |                                                               |                                                                                                                                                                                                                                                                                                                                                            |
|-------|------|------|--------|--------|------|---------------------------------------------------------------|------------------------------------------------------------------------------------------------------------------------------------------------------------------------------------------------------------------------------------------------------------------------------------------------------------------------------------------------------------|
| 39405 | 4.19 | 0.14 | 0.0001 | 0.0020 | 1.76 | all_v2.0.6252.C1                                              | Novel protein similar to caspase 8; n=3; Danio rerio Rep: Novel protein similar to caspase 8 - Danio rerio (Zebrafish) (Brachydanio rerio)                                                                                                                                                                                                                 |
| 49744 | 3.13 | 0.21 | 0.0007 | 0.0069 | 1.76 | all_v2.0.9839.C1                                              | unclassified                                                                                                                                                                                                                                                                                                                                               |
| 54951 | 3.39 | 0.18 | 0.0004 | 0.0045 | 1.76 | all_v2.0.1643.C2                                              | unclassified                                                                                                                                                                                                                                                                                                                                               |
| 44123 | 3.07 | 0.19 | 0.0008 | 0.0077 | 1.75 | all_v2.0.8502.C1                                              | Zinc finger CCHC domain-containing protein 9.; n=1; Takifugu rubripes Rep: Zinc finger CCHC domain-containing protein 9 - Takifugu rubripes                                                                                                                                                                                                                |
| 44472 | 2.69 | 0.25 | 0.0020 | 0.0152 | 1.75 | 2AY614592_Gadus morhua CC chemokine type 3 mRNA, complete cds | custom - CC chemokine<br>Homolog of Brachydanio rerio Fem1c.; n=1; Takifugu rubripes Rep: Homolog of Brachydanio rerio Fem1c. - Takifugu rubripes                                                                                                                                                                                                          |
| 37707 | 6.54 | 0.06 | 0.0000 | 0.0012 | 1.75 | sb_gmapov_0029c16.pDNRF2                                      | unclassified                                                                                                                                                                                                                                                                                                                                               |
| 53189 | 4.33 | 0.13 | 0.0001 | 0.0018 | 1.74 | all_v2.0.11205.C1                                             | Protein MAK10 homolog; n=4; Clupeocephala Rep: Protein MAK10 homolog - Danio rerio (Zebrafish) (Brachydanio rerio)                                                                                                                                                                                                                                         |
| 41492 | 4.28 | 0.13 | 0.0001 | 0.0019 | 1.74 | sb_gmnbgi_0004b13.pDNRF2                                      | unclassified                                                                                                                                                                                                                                                                                                                                               |
| 54741 | 3.77 | 0.16 | 0.0002 | 0.0028 | 1.74 | all_v2.0.735.C1                                               | custom - Fas (TNFRSF6)-associated via death domain                                                                                                                                                                                                                                                                                                         |
| 44518 | 3.83 | 0.15 | 0.0002 | 0.0027 | 1.74 | FAAD5c                                                        | Unassigned protein                                                                                                                                                                                                                                                                                                                                         |
| 48549 | 3.47 | 0.17 | 0.0003 | 0.0041 | 1.74 | all_v2.0.8578.C1                                              | Sister chromatid cohesion protein PDS5 homolog A; n=8; Danio rerio Rep: Sister chromatid cohesion protein PDS5 homolog A - Danio rerio (Zebrafish) (Brachydanio rerio)                                                                                                                                                                                     |
| 42224 | 2.72 | 0.23 | 0.0019 | 0.0145 | 1.74 | sb_gmnbhkic_0017j15.pDNRM13r                                  | Proteasome activator subunit 2; n=3; Clupeocephala Rep: Proteasome activator subunit 2 - Danio rerio (Zebrafish) (Brachydanio rerio)                                                                                                                                                                                                                       |
| 41409 | 3.16 | 0.19 | 0.0006 | 0.0066 | 1.74 | all_v2.0.379.C1                                               | PREDICTED: similar to retinoblastoma-associated protein 140; n=2; Canis lupus familiaris Rep: PREDICTED: similar to retinoblastoma-associated protein 140 - Canis familiaris                                                                                                                                                                               |
| 40930 | 3.29 | 0.19 | 0.0005 | 0.0053 | 1.74 | sb_gmnbspic_0012b01.pDNRF2                                    | Proprotein convertase subtilisin/kexin type 5 precursor (EC 3.4.21.-) (Proprotein convertase PC5) (Subtilisin/kexin-like protease PC5) (PC6) (hPC6).; n=1; Takifugu rubripes Rep: Proprotein convertase subtilisin/kexin type 5 precursor (EC 3.4.21.-) (Proprotein convertase PC5) (Subtilisin/kexin-like protease PC5) (PC6) (hPC6). - Takifugu rubripes |
| 41393 | 3.24 | 0.19 | 0.0005 | 0.0057 | 1.73 | sb_gmnbhkic_0014b13.pDNRF2                                    | U-editing enzyme APOBEC-2 gb AAD45361.1 AF161699_1 APOBEC-2 protein [Mus musculus] gb AAH27530.1 Apolipoprotein B editing complex 2 [Mus musculus] gb EDL23623.1 apolipoprotein B editing complex 2, isoform CRA_b [Mus musculus]                                                                                                                          |
| 46415 | 3.17 | 0.19 | 0.0006 | 0.0065 | 1.73 | sb_gmnl1a_0040g13.t7                                          | unclassified                                                                                                                                                                                                                                                                                                                                               |
| 52140 | 4.30 | 0.13 | 0.0001 | 0.0018 | 1.73 | all_v2.0.2506.C1                                              | unclassified                                                                                                                                                                                                                                                                                                                                               |
| 53350 | 3.38 | 0.17 | 0.0004 | 0.0045 | 1.73 | all_v2.0.16720.C1                                             | unclassified                                                                                                                                                                                                                                                                                                                                               |
| 44520 | 3.19 | 0.19 | 0.0006 | 0.0063 | 1.73 | FAAD7c                                                        | custom - Fas (TNFRSF6)-associated via death domain                                                                                                                                                                                                                                                                                                         |

|       |      |      |        |        |      |                             |                                                                                                                                                                                                                                                                                                                                                                                                         |
|-------|------|------|--------|--------|------|-----------------------------|---------------------------------------------------------------------------------------------------------------------------------------------------------------------------------------------------------------------------------------------------------------------------------------------------------------------------------------------------------------------------------------------------------|
| 50298 | 3.74 | 0.15 | 0.0002 | 0.0029 | 1.73 | all_v2.0.17232.C1           | unclassified<br>Hypoxanthine-guanine phosphoribosyltransferase; n=11; Euteleostomi Rep: Hypoxanthine-guanine phosphoribosyltransferase - Gallus gallus (Chicken)                                                                                                                                                                                                                                        |
| 38536 | 4.11 | 0.13 | 0.0001 | 0.0021 | 1.72 | all_v2.0.5336.C3            |                                                                                                                                                                                                                                                                                                                                                                                                         |
| 51377 | 3.96 | 0.15 | 0.0001 | 0.0023 | 1.72 | all_v2.0.2972.C1            | unclassified<br>Homolog of Homo sapiens Mannosyl (Alpha-1,3-)-glycoprotein beta-1,4-N-acetylglucosaminyltransferase, isoenzyme B, isoform 1; n=2; Clupeocephala Rep: Homolog of Homo sapiens Mannosyl (Alpha-1,3-)-glycoprotein beta-1,4-N-acetylglucosaminyltransferase, isoenzyme B, isoform 1 - Takifugu rubripes                                                                                    |
| 38155 | 4.12 | 0.14 | 0.0001 | 0.0021 | 1.72 | sb_gmapov_0016d17.pDNRF2    | Ring finger protein 4; n=4; Xenopus tropicalis Rep: Ring finger protein 4 - Xenopus tropicalis (Western clawed frog) (Silurana tropicalis)                                                                                                                                                                                                                                                              |
| 41943 | 4.46 | 0.12 | 0.0001 | 0.0017 | 1.72 | all_v2.0.4717.C1            |                                                                                                                                                                                                                                                                                                                                                                                                         |
| 45461 | 3.91 | 0.15 | 0.0001 | 0.0024 | 1.71 | sb_gmnliskic_0001f09.pDNRF2 | Mucin multi-domain protein Geminin; n=1; Oryzias latipes Rep: Geminin - Oryzias latipes (Medaka fish) (Japanese ricefish)                                                                                                                                                                                                                                                                               |
| 37349 | 3.91 | 0.14 | 0.0001 | 0.0024 | 1.71 | all_v2.0.996.C1             | Leukotriene A-4 hydrolase (EC 3.3.2.6) (LTA-4 hydrolase) (Leukotriene A(4) hydrolase); n=1; Takifugu rubripes Rep: Leukotriene A-4 hydrolase (EC 3.3.2.6) (LTA-4 hydrolase) (Leukotriene A(4) hydrolase). - Takifugu rubripes                                                                                                                                                                           |
| 38781 | 2.85 | 0.22 | 0.0014 | 0.0114 | 1.71 | all_v2.0.5859.C3            |                                                                                                                                                                                                                                                                                                                                                                                                         |
| 54462 | 3.35 | 0.17 | 0.0004 | 0.0049 | 1.71 | all_v2.0.4285.C1            | unclassified<br>DNA-directed RNA polymerase I subunit RPA49 (RNA polymerase I- associated factor 53) (RNA polymerase I polypeptide E) (RNA polymerase I-associated factor 1) (A49); n=1; Takifugu rubripes Rep: DNA-directed RNA polymerase I subunit RPA49 (RNA polymerase I- associated factor 53) (RNA polymerase I polypeptide E) (RNA polymerase I-associated factor 1) (A49). - Takifugu rubripes |
| 36901 | 6.41 | 0.06 | 0.0000 | 0.0013 | 1.70 | all_v2.0.5271.C1            |                                                                                                                                                                                                                                                                                                                                                                                                         |
| 48330 | 3.11 | 0.20 | 0.0007 | 0.0071 | 1.70 | sb_gmnlia_0031j13.t7        | Unassigned protein                                                                                                                                                                                                                                                                                                                                                                                      |
| 51243 | 3.82 | 0.14 | 0.0002 | 0.0027 | 1.70 | all_v2.0.1415.C3            | unclassified                                                                                                                                                                                                                                                                                                                                                                                            |
| 46430 | 4.23 | 0.12 | 0.0001 | 0.0019 | 1.70 | all_v2.0.14645.C1           | Unassigned protein                                                                                                                                                                                                                                                                                                                                                                                      |
| 45980 | 3.67 | 0.15 | 0.0002 | 0.0031 | 1.70 | sb_gmnbmd_0011d22.pDNRF2    | PDZ domain containing 2 [Mus musculus] PREDICTED: similar to bloodthirsty; n=2; Danio rerio Rep: PREDICTED: similar to bloodthirsty - Danio rerio                                                                                                                                                                                                                                                       |
| 40262 | 5.57 | 0.08 | 0.0000 | 0.0013 | 1.70 | sb_gmapht_0030a18.pDNRF2    |                                                                                                                                                                                                                                                                                                                                                                                                         |
| 49026 | 3.30 | 0.16 | 0.0004 | 0.0052 | 1.70 | all_v2.0.270.C2             | Unassigned protein<br>UPI0000E4E275 related cluster; n=1; Danio rerio Rep: UPI0000E4E275                                                                                                                                                                                                                                                                                                                |
| 43079 | 6.93 | 0.05 | 0.0000 | 0.0012 | 1.69 | sb_gmapht_0004g05.pDNRF2    | UniRef100 entry - Danio rerio                                                                                                                                                                                                                                                                                                                                                                           |
| 42012 | 3.51 | 0.17 | 0.0003 | 0.0038 | 1.69 | sb_gmnbrts_0003p08.pDNRF2   | Sarcoglycan, beta; n=2; Danio rerio Rep: Sarcoglycan, beta - Brachydanio rerio (Zebrafish) (Danio rerio)                                                                                                                                                                                                                                                                                                |
| 41827 | 3.85 | 0.15 | 0.0002 | 0.0026 | 1.69 | sb_gmapov_0017j24.pDNRF2    | Rfc5 protein; n=5; Clupeocephala Rep: Rfc5 protein - Brachydanio rerio (Zebrafish) (Danio rerio)                                                                                                                                                                                                                                                                                                        |
| 43941 | 3.57 | 0.16 | 0.0003 | 0.0036 | 1.69 | all_v2.0.1382.C1            | Zgc:73375; n=1; Danio rerio Rep: Zgc:73375 - Danio rerio (Zebrafish) (Brachydanio rerio)                                                                                                                                                                                                                                                                                                                |
| 48479 | 3.15 | 0.18 | 0.0006 | 0.0067 | 1.69 | all_v2.0.6321.C4            | Unassigned protein                                                                                                                                                                                                                                                                                                                                                                                      |

|       |      |      |        |        |      |                            |                                                                                                                                                                                                                                                                                                                                  |
|-------|------|------|--------|--------|------|----------------------------|----------------------------------------------------------------------------------------------------------------------------------------------------------------------------------------------------------------------------------------------------------------------------------------------------------------------------------|
| 36757 | 3.54 | 0.15 | 0.0003 | 0.0036 | 1.68 | all_v2.0.1015.C1           | Cytochrome c oxidase subunit VIa polypeptide 1; n=2; Danio rerio Rep: Cytochrome c oxidase subunit VIa polypeptide 1 - Danio rerio (Zebrafish) (Brachydanio rerio)                                                                                                                                                               |
| 49516 | 4.09 | 0.13 | 0.0001 | 0.0021 | 1.68 | all_v2.0.14907.C1          | unclassified<br>Zgc:153440; n=3; Danio rerio Rep: Zgc:153440 - Danio rerio (Zebrafish) (Brachydanio rerio)                                                                                                                                                                                                                       |
| 43681 | 3.19 | 0.19 | 0.0006 | 0.0063 | 1.68 | all_v2.0.6826.C2           | ATPase, Na+/K+ transporting, alpha 3 polypeptide; n=5; Tetrapoda Rep: ATPase, Na+/K+ transporting, alpha 3 polypeptide - Mus musculus (Mouse)<br>LOC501925; similar to solute carrier family 2, member 9 isoform a; K08146 MFS transporter, SP family, solute carrier family 2 (facilitated glucose transporter), member 9       |
| 36051 | 5.16 | 0.09 | 0.0000 | 0.0014 | 1.68 | all_v2.0.15356.C1          | unclassified<br>Bcl2l10 protein; n=2; Danio rerio Rep: Bcl2l10 protein - Danio rerio (Zebrafish) (Brachydanio rerio)                                                                                                                                                                                                             |
| 45123 | 2.88 | 0.21 | 0.0013 | 0.0108 | 1.68 | all_v2.0.13960.C1          | unclassified<br>Unassigned protein<br>Calumenin b; n=3; Otophysi Rep: Calumenin b - Danio rerio (Zebrafish) (Brachydanio rerio)                                                                                                                                                                                                  |
| 55134 | 4.19 | 0.12 | 0.0001 | 0.0020 | 1.68 | all_v2.0.392.C2            | Zgc:86905; n=1; Danio rerio Rep: Zgc:86905 - Danio rerio (Zebrafish) (Brachydanio rerio)                                                                                                                                                                                                                                         |
| 36121 | 3.78 | 0.14 | 0.0002 | 0.0028 | 1.67 | all_v2.0.5784.C1           | unclassified<br>VHSV-induced protein; n=1; Oncorhynchus mykiss Rep: VHSV-induced protein - Oncorhynchus mykiss (Rainbow trout) (Salmo gairdneri)                                                                                                                                                                                 |
| 47158 | 3.96 | 0.13 | 0.0001 | 0.0023 | 1.67 | sb_gmnbhkas_0007119.pDNRF2 | unclassified<br>Novel protein; n=3; Danio rerio Rep: Novel protein - Danio rerio (Zebrafish) (Brachydanio rerio)                                                                                                                                                                                                                 |
| 36286 | 4.13 | 0.12 | 0.0001 | 0.0021 | 1.67 | sb_gmnbg_i_0003c04.pDNRF2  | PREDICTED: similar to Nipsnap1 protein; n=1; Monodelphis domestica Rep: PREDICTED: similar to Nipsnap1 protein - Monodelphis domestica                                                                                                                                                                                           |
| 44015 | 3.98 | 0.13 | 0.0001 | 0.0023 | 1.67 | all_v2.0.11085.C1          | Zgc:112050; n=2; Danio rerio Rep: Zgc:112050 - Danio rerio (Zebrafish) (Brachydanio rerio)                                                                                                                                                                                                                                       |
| 49858 | 3.79 | 0.14 | 0.0002 | 0.0028 | 1.67 | all_v2.0.2226.C1           | Thymidine phosphorylase precursor (EC 2.4.2.4) (TDRPase) (TP) (Platelet-derived endothelial cell growth factor) (PD-ECGF) (Gliostatin).; n=1; Takifugu rubripes Rep: Thymidine phosphorylase precursor (EC 2.4.2.4) (TDRPase) (TP) (Platelet-derived endothelial cell growth factor) (PD-ECGF) (Gliostatin). - Takifugu rubripes |
| 43195 | 5.59 | 0.07 | 0.0000 | 0.0013 | 1.67 | all_v2.0.3448.C1           | PREDICTED: similar to protein tyrosine phosphatase, receptor type, B; n=1; Ornithorhynchus anatinus Rep: PREDICTED: similar to protein tyrosine phosphatase, receptor type, B - Ornithorhynchus anatinus                                                                                                                         |
| 51110 | 2.83 | 0.19 | 0.0014 | 0.0117 | 1.67 | all_v2.0.11720.C1          | ATP-sensitive inward rectifier potassium channel 15 (Potassium channel, inwardly rectifying subfamily J member 15) (Inward rectifier K(+) channel Kir4.2) (Kir1.3).; n=1; Takifugu rubripes Rep: ATP-sensitive inward rectifier potassium                                                                                        |
| 39661 | 2.80 | 0.19 | 0.0015 | 0.0123 | 1.66 | all_v2.0.4098.C2           |                                                                                                                                                                                                                                                                                                                                  |
| 40720 | 4.64 | 0.10 | 0.0001 | 0.0016 | 1.65 | all_v2.0.13762.C1          |                                                                                                                                                                                                                                                                                                                                  |
| 43485 | 4.12 | 0.12 | 0.0001 | 0.0021 | 1.65 | all_v2.0.4514.C4           |                                                                                                                                                                                                                                                                                                                                  |
| 42564 | 3.54 | 0.15 | 0.0003 | 0.0036 | 1.65 | all_v2.0.5070.C1           |                                                                                                                                                                                                                                                                                                                                  |
| 40891 | 3.51 | 0.16 | 0.0003 | 0.0039 | 1.65 | all_v2.0.15259.C1          |                                                                                                                                                                                                                                                                                                                                  |
| 36080 | 4.42 | 0.11 | 0.0001 | 0.0017 | 1.65 | sb_gmnbhkas_0015j06.pDNRF2 |                                                                                                                                                                                                                                                                                                                                  |

|       |      |      |        |        |      |                         |                                                                                                                                                                                                                                                                                                                                                                                                                                                                                                                                                                                  |
|-------|------|------|--------|--------|------|-------------------------|----------------------------------------------------------------------------------------------------------------------------------------------------------------------------------------------------------------------------------------------------------------------------------------------------------------------------------------------------------------------------------------------------------------------------------------------------------------------------------------------------------------------------------------------------------------------------------|
| 41403 | 3.01 | 0.20 | 0.0009 | 0.0085 | 1.65 | sb_gmnlsfic_0011p03.t7  | channel 15 (Potassium channel, inwardly rectifying subfamily J member 15) (Inward rectifier K(+) channel Kir4.2) (Kir1.3). - Takifugu rubripes<br>Proteasome (Prosome, macropain) subunit, alpha type, 6b; n=2; Danio rerio Rep: Proteasome (Prosome, macropain) subunit, alpha type, 6b - Brachydanio rerio (Zebrafish) (Danio rerio)<br>Mitochondrial import inner membrane translocase subunit Tim13.; n=1; Takifugu rubripes Rep: Mitochondrial import inner membrane translocase subunit Tim13. - Takifugu rubripes                                                         |
| 39108 | 2.61 | 0.25 | 0.0025 | 0.0174 | 1.64 | all_v2.0.3508.C1        | GTP-binding nuclear protein Ran; n=35; Euteleostomi Rep: GTP-binding nuclear protein Ran - Homo sapiens (Human)                                                                                                                                                                                                                                                                                                                                                                                                                                                                  |
| 37498 | 3.49 | 0.14 | 0.0003 | 0.0039 | 1.64 | all_v2.0.3198.C3        | unclassified                                                                                                                                                                                                                                                                                                                                                                                                                                                                                                                                                                     |
| 55271 | 3.50 | 0.14 | 0.0003 | 0.0039 | 1.64 | all_v2.0.2992.C2        | unclassified                                                                                                                                                                                                                                                                                                                                                                                                                                                                                                                                                                     |
| 55394 | 2.60 | 0.20 | 0.0026 | 0.0176 | 1.64 | all_v2.0.11844.C4       | unclassified                                                                                                                                                                                                                                                                                                                                                                                                                                                                                                                                                                     |
| 47794 | 2.51 | 0.23 | 0.0033 | 0.0207 | 1.64 | all_v2.0.14226.C1       | Unassigned protein<br>NOP56; n=5; Danio rerio Rep: NOP56 - Danio rerio (Zebrafish) (Brachydanio rerio)                                                                                                                                                                                                                                                                                                                                                                                                                                                                           |
| 39358 | 3.24 | 0.16 | 0.0005 | 0.0058 | 1.64 | all_v2.0.362.C2         | unclassified                                                                                                                                                                                                                                                                                                                                                                                                                                                                                                                                                                     |
| 54838 | 2.70 | 0.20 | 0.0020 | 0.0150 | 1.64 | all_v2.0.17312.C1       | custom - interleukin-1 receptor-associated kinase 4                                                                                                                                                                                                                                                                                                                                                                                                                                                                                                                              |
| 44550 | 3.66 | 0.14 | 0.0002 | 0.0031 | 1.63 | IRAK41                  | Co-chaperone protein HscB, mitochondrial precursor (Hsc20) (DnaJ homolog subfamily C member 20).; n=1; Takifugu rubripes Rep: Co-chaperone protein HscB, mitochondrial precursor (Hsc20) (DnaJ homolog subfamily C member 20). - Takifugu rubripes                                                                                                                                                                                                                                                                                                                               |
| 36549 | 2.41 | 0.24 | 0.0043 | 0.0248 | 1.63 | all_v2.0.6292.C1        | NFX1-type zinc finger-containing protein 1.; n=1; Takifugu rubripes Rep: NFX1-type zinc finger-containing protein 1 - Takifugu rubripes                                                                                                                                                                                                                                                                                                                                                                                                                                          |
| 39323 | 4.48 | 0.10 | 0.0001 | 0.0017 | 1.63 | all_v2.0.6027.C9        | Proteasome activator complex subunit 1 (Proteasome activator 28-alpha subunit) (PA28alpha) (PA28a) (Activator of multicatalytic protease subunit 1) (11S regulator complex subunit alpha) (REG-alpha) (Interferon gamma up-regulated I-5111 protein) (IGUP I-51; n=1; Takifugu rubripes Rep: Proteasome activator complex subunit 1 (Proteasome activator 28-alpha subunit) (PA28alpha) (PA28a) (Activator of multicatalytic protease subunit 1) (11S regulator complex subunit alpha) (REG-alpha) (Interferon gamma up-regulated I-5111 protein) (IGUP I-51 - Takifugu rubripes |
| 41407 | 3.80 | 0.13 | 0.0002 | 0.0027 | 1.63 | all_v2.0.9147.C1        | Zgc:64031; n=3; Danio rerio Rep: Zgc:64031 - Danio rerio (Zebrafish) (Brachydanio rerio)                                                                                                                                                                                                                                                                                                                                                                                                                                                                                         |
| 43888 | 3.40 | 0.14 | 0.0004 | 0.0045 | 1.62 | all_v2.0.15537.C1       | PREDICTED: similar to Rp42 homolog (pending); n=1; Ornithorhynchus anatinus Rep: PREDICTED: similar to Rp42 homolog (pending) - Ornithorhynchus anatinus                                                                                                                                                                                                                                                                                                                                                                                                                         |
| 40973 | 2.70 | 0.23 | 0.0020 | 0.0149 | 1.62 | all_v2.0.10058.C1       | Unassigned protein                                                                                                                                                                                                                                                                                                                                                                                                                                                                                                                                                               |
| 46931 | 2.68 | 0.20 | 0.0021 | 0.0156 | 1.62 | sb_gmnlem_0007n11.sp6   | Unassigned protein                                                                                                                                                                                                                                                                                                                                                                                                                                                                                                                                                               |
| 48343 | 3.84 | 0.12 | 0.0002 | 0.0026 | 1.62 | sb_gmlbgits_0003d14.sp6 | Unassigned protein                                                                                                                                                                                                                                                                                                                                                                                                                                                                                                                                                               |
| 51629 | 4.22 | 0.10 | 0.0001 | 0.0019 | 1.62 | all_v2.0.11166.C1       | unclassified                                                                                                                                                                                                                                                                                                                                                                                                                                                                                                                                                                     |

|       |      |      |        |        |      |                             |                                                                                                                                                                                                                                                                                                                                                                                                  |
|-------|------|------|--------|--------|------|-----------------------------|--------------------------------------------------------------------------------------------------------------------------------------------------------------------------------------------------------------------------------------------------------------------------------------------------------------------------------------------------------------------------------------------------|
| 38444 | 3.96 | 0.12 | 0.0001 | 0.0023 | 1.62 | all_v2.0.10457.C1           | Homolog of Homo sapiens Zinc finger CCCH type domain containing protein 1; n=2; Takifugu rubripes Rep: Homolog of Homo sapiens Zinc finger CCCH type domain containing protein 1 - Takifugu rubripes                                                                                                                                                                                             |
| 45631 | 4.66 | 0.09 | 0.0001 | 0.0015 | 1.61 | all_v2.0.16338.C1           | non-directed<br>Torsin B precursor (Torsin family 1 member B).; n=1; Takifugu rubripes Rep: Torsin B precursor (Torsin family 1 member B). - Takifugu rubripes                                                                                                                                                                                                                                   |
| 42617 | 4.92 | 0.09 | 0.0000 | 0.0014 | 1.61 | sb_gmnbpcic_0011f05.pDNRf2  |                                                                                                                                                                                                                                                                                                                                                                                                  |
| 54782 | 4.46 | 0.10 | 0.0001 | 0.0017 | 1.61 | all_v2.0.13581.C1           | unclassified<br>Fibroblast growth factor (Acidic) intracellular binding protein; n=2; Danio rerio Rep: Fibroblast growth factor (Acidic) intracellular binding protein - Danio rerio (Zebrafish) (Brachydanio rerio)                                                                                                                                                                             |
| 37226 | 2.96 | 0.17 | 0.0010 | 0.0093 | 1.61 | all_v2.0.556.C2             |                                                                                                                                                                                                                                                                                                                                                                                                  |
| 53017 | 3.09 | 0.16 | 0.0007 | 0.0074 | 1.61 | all_v2.0.3331.C1            | unclassified<br>Novel protein similar to vertebrate transmembrane 4 L six family member 4; n=2; Danio rerio Rep: Novel protein similar to vertebrate transmembrane 4 L six family member 4 - Danio rerio (Zebrafish) (Brachydanio rerio)                                                                                                                                                         |
| 39544 | 3.42 | 0.14 | 0.0003 | 0.0043 | 1.61 | all_v2.0.4218.C1            | MORC3, LOC610219; MORC family CW-type zinc finger 3                                                                                                                                                                                                                                                                                                                                              |
| 45443 | 2.96 | 0.17 | 0.0010 | 0.0093 | 1.61 | all_v2.0.7949.C2            |                                                                                                                                                                                                                                                                                                                                                                                                  |
| 51581 | 4.65 | 0.09 | 0.0001 | 0.0015 | 1.61 | all_v2.0.15506.C1           | unclassified<br>Heat shock 10kD protein 1; n=3; Danio rerio Rep: Heat shock 10kD protein 1 - Danio rerio (Zebrafish) (Brachydanio rerio)                                                                                                                                                                                                                                                         |
| 37542 | 2.85 | 0.20 | 0.0013 | 0.0114 | 1.61 | all_v2.0.8751.C1            |                                                                                                                                                                                                                                                                                                                                                                                                  |
| 53647 | 3.71 | 0.13 | 0.0002 | 0.0030 | 1.60 | all_v2.0.18089.C1           | unclassified                                                                                                                                                                                                                                                                                                                                                                                     |
| 46560 | 2.88 | 0.18 | 0.0013 | 0.0108 | 1.60 | sb_gmapte_0011c07.pDNRm13r  | Unassigned protein<br>Guanine nucleotide-binding protein-like 3 (Nucleolar GTP-binding protein 3) (Nucleostemin) (E2-induced gene 3-protein) (Novel nucleolar protein 47) (NNP47).; n=1; Takifugu rubripes Rep: Guanine nucleotide-binding protein-like 3 (Nucleolar GTP-binding protein 3) (Nucleostemin) (E2-induced gene 3-protein) (Novel nucleolar protein 47) (NNP47). - Takifugu rubripes |
| 37520 | 3.03 | 0.18 | 0.0008 | 0.0082 | 1.60 | all_v2.0.2566.C1            |                                                                                                                                                                                                                                                                                                                                                                                                  |
| 53739 | 3.29 | 0.15 | 0.0005 | 0.0053 | 1.60 | all_v2.0.354.C2             | unclassified<br>Transcription factor; n=8; Clupeocephala Rep: Transcription factor - Danio rerio (Zebrafish) (Brachydanio rerio)                                                                                                                                                                                                                                                                 |
| 42664 | 5.48 | 0.07 | 0.0000 | 0.0013 | 1.60 | sb_gmnlkic_0011d03.pDNRm13r |                                                                                                                                                                                                                                                                                                                                                                                                  |
| 37499 | 3.26 | 0.16 | 0.0005 | 0.0056 | 1.60 | all_v2.0.3198.C2            | GTP-binding nuclear protein Ran; n=35; Euteleostomi Rep: GTP-binding nuclear protein Ran - Homo sapiens (Human)                                                                                                                                                                                                                                                                                  |
| 54381 | 4.66 | 0.09 | 0.0001 | 0.0015 | 1.60 | all_v2.0.4316.C1            | unclassified<br>LOC558134 protein; n=2; Danio rerio Rep: LOC558134 protein - Danio rerio (Zebrafish) (Brachydanio rerio)                                                                                                                                                                                                                                                                         |
| 38832 | 2.99 | 0.17 | 0.0009 | 0.0088 | 1.60 | all_v2.0.17701.C1           |                                                                                                                                                                                                                                                                                                                                                                                                  |
| 54777 | 2.85 | 0.20 | 0.0013 | 0.0113 | 1.60 | all_v2.0.3549.C1            | unclassified                                                                                                                                                                                                                                                                                                                                                                                     |
| 52780 | 2.68 | 0.20 | 0.0021 | 0.0156 | 1.59 | all_v2.0.4435.C1            | unclassified                                                                                                                                                                                                                                                                                                                                                                                     |
| 47761 | 4.91 | 0.08 | 0.0001 | 0.0014 | 1.59 | all_v2.0.7777.C1            | Unassigned protein                                                                                                                                                                                                                                                                                                                                                                               |



|       |      |      |        |        |      |                            |                                                                                                                                                                                                                                                                                                                                                                                                                                                                                                                                                                                  |
|-------|------|------|--------|--------|------|----------------------------|----------------------------------------------------------------------------------------------------------------------------------------------------------------------------------------------------------------------------------------------------------------------------------------------------------------------------------------------------------------------------------------------------------------------------------------------------------------------------------------------------------------------------------------------------------------------------------|
| 43876 | 3.79 | 0.12 | 0.0002 | 0.0028 | 1.59 | all_v2.0.1930.C13          | Zgc:63602; n=2; Danio rerio Rep: Zgc:63602 - Danio rerio (Zebrafish) (Brachydanio rerio)                                                                                                                                                                                                                                                                                                                                                                                                                                                                                         |
| 49133 | 3.24 | 0.15 | 0.0005 | 0.0057 | 1.59 | all_v2.0.10685.C1          | unclassified                                                                                                                                                                                                                                                                                                                                                                                                                                                                                                                                                                     |
| 45298 | 5.29 | 0.07 | 0.0000 | 0.0014 | 1.59 | sb_gmapht_0036007.pDNRF2   | LOC728894; similar to gamma-aminobutyric acid (GABA-A) receptor, subunit epsilon                                                                                                                                                                                                                                                                                                                                                                                                                                                                                                 |
| 36328 | 5.10 | 0.07 | 0.0000 | 0.0014 | 1.59 | all_v2.0.16926.C1          | CASP8 and FADD-like apoptosis regulator precursor (Cellular FLICE-like inhibitory protein) (c-FLIP) (Caspase-eight-related protein) (Casper) (Caspase-like apoptosis regulatory protein) (CLARP) (MACH-related inducer of toxicity) (MRIT) (Caspase homolog) (C; n=1; Takifugu rubripes Rep: CASP8 and FADD-like apoptosis regulator precursor (Cellular FLICE-like inhibitory protein) (c-FLIP) (Caspase-eight-related protein) (Casper) (Caspase-like apoptosis regulatory protein) (CLARP) (MACH-related inducer of toxicity) (MRIT) (Caspase homolog) (C - Takifugu rubripes |
| 43137 | 3.31 | 0.14 | 0.0004 | 0.0051 | 1.58 | all_v2.0.10071.C1          | Uroporphyrinogen-III synthase (EC 4.2.1.75) (UROS) (Uroporphyrinogen-III cosynthetase) (Hydroxymethylbilane hydrolyase [cyclizing]) (UROHIS); n=1; Takifugu rubripes Rep: Uroporphyrinogen-III synthase (EC 4.2.1.75) (UROS) (Uroporphyrinogen-III cosynthetase) (Hydroxymethylbilane hydrolyase [cyclizing]) (UROHIS) - Takifugu rubripes                                                                                                                                                                                                                                       |
| 39484 | 4.17 | 0.10 | 0.0001 | 0.0020 | 1.58 | all_v2.0.9992.C1           | Novel protein similar to vertebrate Mov10, Moloney leukemia virus 10, homolog; n=1; Danio rerio Rep: Novel protein similar to vertebrate Mov10, Moloney leukemia virus 10, homolog - Danio rerio (Zebrafish) (Brachydanio rerio)                                                                                                                                                                                                                                                                                                                                                 |
| 39291 | 2.63 | 0.18 | 0.0024 | 0.0169 | 1.58 | sb_gmnbmu_0014b24.pDNRF2   | Nebulin.; n=1; Takifugu rubripes Rep: Nebulin. - Takifugu rubripes                                                                                                                                                                                                                                                                                                                                                                                                                                                                                                               |
| 45194 | 3.97 | 0.11 | 0.0001 | 0.0023 | 1.58 | sb_gmnbhkas_0003p09.pDNRF2 | LOC570463; similar to Ubiquitin carboxyl-terminal hydrolase 47 (Ubiquitin thioesterase 47) (Ubiquitin-specific-processing protease 47) (Deubiquitinating enzyme 47)                                                                                                                                                                                                                                                                                                                                                                                                              |
| 43629 | 3.64 | 0.13 | 0.0002 | 0.0033 | 1.58 | all_v2.0.9085.C1           | Zgc:136962; n=1; Danio rerio Rep: Zgc:136962 - Danio rerio (Zebrafish) (Brachydanio rerio)                                                                                                                                                                                                                                                                                                                                                                                                                                                                                       |
| 51898 | 2.56 | 0.23 | 0.0029 | 0.0191 | 1.58 | all_v2.0.5263.C3           | unclassified                                                                                                                                                                                                                                                                                                                                                                                                                                                                                                                                                                     |
| 44256 | 3.00 | 0.16 | 0.0009 | 0.0086 | 1.58 | all_v2.0.1221.C3           | AIG1 domain containing protein                                                                                                                                                                                                                                                                                                                                                                                                                                                                                                                                                   |
| 43087 | 2.95 | 0.17 | 0.0010 | 0.0094 | 1.58 | sb_gmnbbrts_0007a15.pDNRF2 | UPI0000ECD032 related cluster; n=1; Gallus gallus Rep: UPI0000ECD032 UniRef100 entry - Gallus gallus                                                                                                                                                                                                                                                                                                                                                                                                                                                                             |
| 47039 | 2.48 | 0.24 | 0.0036 | 0.0220 | 1.58 | sb_gmnbhkas_0001d21.pDNRF2 | Unassigned protein                                                                                                                                                                                                                                                                                                                                                                                                                                                                                                                                                               |
| 42205 | 2.43 | 0.21 | 0.0041 | 0.0239 | 1.58 | all_v2.0.3661.C1           | Similar to CG3625-PB; n=1; Bos taurus Rep: Similar to CG3625-PB - Bos taurus (Bovine)                                                                                                                                                                                                                                                                                                                                                                                                                                                                                            |
| 53199 | 3.49 | 0.13 | 0.0003 | 0.0039 | 1.57 | all_v2.0.4852.C1           | unclassified                                                                                                                                                                                                                                                                                                                                                                                                                                                                                                                                                                     |
| 36398 | 3.13 | 0.15 | 0.0007 | 0.0070 | 1.57 | sb_gmnlfsas_0003j23.t17    | CD3 zeta chain; n=1; Ictalurus punctatus Rep: CD3 zeta chain - Ictalurus punctatus (Channel catfish)                                                                                                                                                                                                                                                                                                                                                                                                                                                                             |
| 35770 | 2.46 | 0.21 | 0.0037 | 0.0225 | 1.57 | all_v2.0.2116.C1           | Acyl-CoA synthetase family member 2, mitochondrial precursor; n=2; Danio rerio Rep: Acyl-CoA synthetase family                                                                                                                                                                                                                                                                                                                                                                                                                                                                   |

|       |      |      |        |        |      |                             |                                                                                                                                                                                                                                                        |
|-------|------|------|--------|--------|------|-----------------------------|--------------------------------------------------------------------------------------------------------------------------------------------------------------------------------------------------------------------------------------------------------|
|       |      |      |        |        |      |                             | member 2, mitochondrial precursor - Danio rerio (Zebrafish) (Brachydanio rerio)                                                                                                                                                                        |
| 49199 | 3.02 | 0.16 | 0.0009 | 0.0084 | 1.57 | all_v2.0.3196.C1            | unclassified                                                                                                                                                                                                                                           |
|       |      |      |        |        |      |                             | Dysbindin; n=4; Danio rerio Rep: Dysbindin - Danio rerio (Zebrafish) (Brachydanio rerio)                                                                                                                                                               |
| 36962 | 2.50 | 0.19 | 0.0034 | 0.0213 | 1.57 | all_v2.0.12651.C1           |                                                                                                                                                                                                                                                        |
| 46358 | 2.51 | 0.20 | 0.0033 | 0.0207 | 1.57 | all_v2.0.7414.C2            | TNIP3, LOC483847; TNFAIP3 interacting protein 3                                                                                                                                                                                                        |
| 46192 | 4.10 | 0.10 | 0.0001 | 0.0021 | 1.56 | all_v2.0.8585.C1            | RVT_1 domain containing protein                                                                                                                                                                                                                        |
| 54046 | 4.18 | 0.10 | 0.0001 | 0.0020 | 1.56 | all_v2.0.5705.C1            | unclassified                                                                                                                                                                                                                                           |
| 55108 | 4.30 | 0.09 | 0.0001 | 0.0018 | 1.56 | all_v2.0.8631.C1            | unclassified                                                                                                                                                                                                                                           |
|       |      |      |        |        |      |                             | Phosphatidylethanolamine binding protein; n=3; Danio rerio Rep: Phosphatidylethanolamine binding protein - Danio rerio (Zebrafish) (Brachydanio rerio)                                                                                                 |
| 39936 | 3.07 | 0.16 | 0.0008 | 0.0077 | 1.56 | all_v2.0.12391.C1           |                                                                                                                                                                                                                                                        |
|       |      |      |        |        |      |                             | PWP2 periodic tryptophan protein homolog; n=2; Danio rerio Rep: PWP2 periodic tryptophan protein homolog - Danio rerio (Zebrafish) (Brachydanio rerio)                                                                                                 |
| 41648 | 3.08 | 0.16 | 0.0007 | 0.0075 | 1.56 | all_v2.0.15324.C1           |                                                                                                                                                                                                                                                        |
|       |      |      |        |        |      |                             | Transposase; n=27; Anopheles gambiae Rep: Transposase - Anopheles gambiae (African malaria mosquito)                                                                                                                                                   |
| 42784 | 3.40 | 0.14 | 0.0004 | 0.0045 | 1.56 | sb_gmnblits_0022m22.pDNRf2  |                                                                                                                                                                                                                                                        |
| 53096 | 2.38 | 0.20 | 0.0046 | 0.0263 | 1.56 | all_v2.0.6003.C1            | unclassified                                                                                                                                                                                                                                           |
| 53347 | 3.04 | 0.15 | 0.0008 | 0.0081 | 1.56 | all_v2.0.9197.C1            | unclassified                                                                                                                                                                                                                                           |
|       |      |      |        |        |      |                             | Ribosomal protein L32; n=5; Euteleostei Rep: Ribosomal protein L32 - Oncorhynchus masou formosanus                                                                                                                                                     |
| 41894 | 3.80 | 0.11 | 0.0002 | 0.0027 | 1.55 | all_v2.0.2051.C1            |                                                                                                                                                                                                                                                        |
| 55097 | 2.97 | 0.16 | 0.0010 | 0.0091 | 1.55 | all_v2.0.17103.C1           | unclassified                                                                                                                                                                                                                                           |
| 50117 | 2.77 | 0.17 | 0.0016 | 0.0130 | 1.55 | all_v2.0.6258.C1            | unclassified                                                                                                                                                                                                                                           |
| 50043 | 2.62 | 0.19 | 0.0025 | 0.0172 | 1.55 | all_v2.0.12521.C1           | unclassified                                                                                                                                                                                                                                           |
| 55349 | 3.44 | 0.13 | 0.0003 | 0.0042 | 1.55 | all_v2.0.8627.C1            | unclassified                                                                                                                                                                                                                                           |
| 45737 | 3.03 | 0.14 | 0.0008 | 0.0083 | 1.55 | all_v2.0.15887.C1.a         | non-directed                                                                                                                                                                                                                                           |
|       |      |      |        |        |      |                             | LOC607320; similar to NOL1/NOP2/Sun domain family, member 3                                                                                                                                                                                            |
| 45232 | 4.05 | 0.10 | 0.0001 | 0.0022 | 1.55 | sb_gmapov_0010i17.pDNRm13r  |                                                                                                                                                                                                                                                        |
| 50350 | 2.74 | 0.16 | 0.0018 | 0.0139 | 1.55 | all_v2.0.6687.C1            | unclassified                                                                                                                                                                                                                                           |
|       |      |      |        |        |      |                             | Interferon-inducible protein Gig1; n=1; Psetta maxima Rep: Interferon-inducible protein Gig1 - Scophthalmus maximus (Turbot)                                                                                                                           |
| 38619 | 4.70 | 0.08 | 0.0001 | 0.0015 | 1.55 | all_v2.0.3448.C5            |                                                                                                                                                                                                                                                        |
| 49472 | 3.42 | 0.13 | 0.0003 | 0.0043 | 1.55 | all_v2.0.12909.C1           | unclassified                                                                                                                                                                                                                                           |
|       |      |      |        |        |      |                             | Ubiquitin-conjugating enzyme E2 L3; n=32; Euteleostomi Rep: Ubiquitin-conjugating enzyme E2 L3 - Homo sapiens (Human)                                                                                                                                  |
| 42931 | 3.79 | 0.11 | 0.0002 | 0.0028 | 1.54 | sb_gmnbbbr_0015n03.pDNRm13r |                                                                                                                                                                                                                                                        |
| 49810 | 3.27 | 0.14 | 0.0005 | 0.0054 | 1.54 | all_v2.0.15814.C1           | unclassified                                                                                                                                                                                                                                           |
|       |      |      |        |        |      |                             | Signal recognition particle receptor subunit alpha (SR-alpha) (Docking protein alpha) (DP-alpha).; n=4; Xenopus tropicalis Rep: Signal recognition particle receptor subunit alpha (SR-alpha) (Docking protein alpha) (DP-alpha). - Xenopus tropicalis |
| 42202 | 3.74 | 0.11 | 0.0002 | 0.0029 | 1.54 | all_v2.0.9256.C1            |                                                                                                                                                                                                                                                        |

|       |      |      |        |        |      |                            |                                                                                                                                                                                                                                                                                                |
|-------|------|------|--------|--------|------|----------------------------|------------------------------------------------------------------------------------------------------------------------------------------------------------------------------------------------------------------------------------------------------------------------------------------------|
| 51254 | 2.52 | 0.18 | 0.0032 | 0.0205 | 1.54 | all_v2.0.9392.C1           | unclassified                                                                                                                                                                                                                                                                                   |
| 44615 | 2.46 | 0.19 | 0.0038 | 0.0227 | 1.54 | TLR9Cend                   | custom - toll-like receptor 9                                                                                                                                                                                                                                                                  |
| 51271 | 5.11 | 0.06 | 0.0000 | 0.0014 | 1.54 | all_v2.0.15970.C1          | unclassified                                                                                                                                                                                                                                                                                   |
| 52097 | 3.32 | 0.13 | 0.0004 | 0.0050 | 1.54 | all_v2.0.10732.C1          | unclassified                                                                                                                                                                                                                                                                                   |
| 43435 | 2.80 | 0.16 | 0.0015 | 0.0123 | 1.54 | all_v2.0.5852.C1           | Zgc:110354; n=3; Danio rerio Rep: Zgc:110354 - Danio rerio (Zebrafish) (Brachydanio rerio)<br>Plasminogen precursor; n=1;<br>Oncorhynchus mykiss Rep: Plasminogen precursor - Oncorhynchus mykiss (Rainbow trout) (Salmo gairdneri)                                                            |
| 40005 | 2.47 | 0.20 | 0.0037 | 0.0224 | 1.54 | all_v2.0.17201.C1          | unclassified                                                                                                                                                                                                                                                                                   |
| 51450 | 2.47 | 0.20 | 0.0037 | 0.0222 | 1.54 | all_v2.0.12876.C1          | unclassified                                                                                                                                                                                                                                                                                   |
| 42836 | 2.81 | 0.16 | 0.0015 | 0.0122 | 1.54 | sb_gmnbhkas_0004f17.pDNRF2 | Tumor necrosis factor receptor-2; n=1;<br>Paralichthys olivaceus Rep: Tumor necrosis factor receptor-2 - Paralichthys olivaceus (Japanese flounder)<br>NFX1-type zinc finger-containing protein 1.; n=1; Takifugu rubripes Rep: NFX1-type zinc finger-containing protein 1 - Takifugu rubripes |
| 39322 | 2.88 | 0.15 | 0.0012 | 0.0106 | 1.53 | all_v2.0.6027.C1           | Calmodulin; n=24; Eukaryota Rep: Calmodulin - Homo sapiens (Human)                                                                                                                                                                                                                             |
| 36265 | 2.59 | 0.17 | 0.0027 | 0.0179 | 1.53 | all_v2.0.234.C13           | unclassified                                                                                                                                                                                                                                                                                   |
| 50815 | 4.26 | 0.08 | 0.0001 | 0.0019 | 1.53 | all_v2.0.10148.C1          | unclassified                                                                                                                                                                                                                                                                                   |
| 49072 | 3.36 | 0.13 | 0.0004 | 0.0047 | 1.53 | all_v2.0.16355.C1          | unclassified                                                                                                                                                                                                                                                                                   |
| 45026 | 2.86 | 0.17 | 0.0013 | 0.0112 | 1.53 | sb_gmnlsras_0003k15.t7     | LOC100030284; similar to asteroid homolog 1                                                                                                                                                                                                                                                    |
| 45488 | 3.12 | 0.14 | 0.0007 | 0.0070 | 1.53 | all_v2.0.11021.C1.a        | non-directed                                                                                                                                                                                                                                                                                   |
| 42266 | 2.66 | 0.17 | 0.0022 | 0.0161 | 1.53 | all_v2.0.15186.C1          | sno, strawberry notch homolog 1; n=1; Takifugu rubripes Rep: sno, strawberry notch homolog 1 - Takifugu rubripes<br>Homolog of Brachydanio rerio Tubulin, alpha 8 like 2.; n=1; Takifugu rubripes Rep: Homolog of Brachydanio rerio Tubulin, alpha 8 like 2 - Takifugu rubripes                |
| 37834 | 2.66 | 0.17 | 0.0022 | 0.0161 | 1.53 | all_v2.0.2356.C4           | custom - Interferon regulatory factor 10K Alpha-2-macroglobulin; n=1; Sparus aurata Rep: Alpha-2-macroglobulin - Sparus aurata (Gilthead sea bream)<br>Alpha-aminoadipic semialdehyde dehydrogenase; n=12; Eutheria Rep: Alpha-aminoadipic semialdehyde dehydrogenase - Homo sapiens (Human)   |
| 44547 | 3.56 | 0.11 | 0.0003 | 0.0036 | 1.53 | IRF1OK5                    | Unassigned protein                                                                                                                                                                                                                                                                             |
| 35877 | 3.86 | 0.10 | 0.0002 | 0.0026 | 1.52 | all_v2.0.2896.C1           | SRY-box containing gene 11a; n=1; Gnathonemus petersii Rep: SRY-box containing gene 11a - Gnathonemus petersii                                                                                                                                                                                 |
| 35880 | 3.41 | 0.12 | 0.0004 | 0.0044 | 1.52 | sb_gmnllfta_0005j01.t7     | Homeobox protein Hox-C13a; n=9; Clupeocephala Rep: Homeobox protein Hox-C13a - Brachydanio rerio (Zebrafish) (Danio rerio)                                                                                                                                                                     |
| 46901 | 2.80 | 0.16 | 0.0015 | 0.0124 | 1.52 | all_v2.0.143.C1            | LOC100031012; similar to very large inducible GTPase 1<br>Poly(RC) binding protein 2; n=3; Euteleostomi Rep: Poly(RC) binding protein 2 - Danio rerio (Zebrafish) (Brachydanio rerio)                                                                                                          |
| 42375 | 3.63 | 0.11 | 0.0002 | 0.0033 | 1.52 | sb_gmnbspic_0005a23.pDNRF2 | DKEY-218F9.5, LOC571141; novel protein similar to bloodthirsty (bty)                                                                                                                                                                                                                           |
| 37655 | 3.47 | 0.12 | 0.0003 | 0.0041 | 1.52 | sb_gmapov_0006b08.pDNRM13r | Drf_FH1 multi-domain protein                                                                                                                                                                                                                                                                   |
| 45030 | 3.40 | 0.12 | 0.0004 | 0.0045 | 1.52 | all_v2.0.2894.C4           |                                                                                                                                                                                                                                                                                                |
| 40065 | 2.50 | 0.18 | 0.0034 | 0.0212 | 1.51 | all_v2.0.7210.C1           |                                                                                                                                                                                                                                                                                                |
| 44649 | 4.83 | 0.07 | 0.0001 | 0.0015 | 1.51 | all_v2.0.661.C6            |                                                                                                                                                                                                                                                                                                |
| 44663 | 4.12 | 0.09 | 0.0001 | 0.0021 | 1.51 | all_v2.0.7931.C1           |                                                                                                                                                                                                                                                                                                |

|       |      |      |        |        |      |                                      |                                                                                                                                                                                                                                                                                                                                                                                                                             |
|-------|------|------|--------|--------|------|--------------------------------------|-----------------------------------------------------------------------------------------------------------------------------------------------------------------------------------------------------------------------------------------------------------------------------------------------------------------------------------------------------------------------------------------------------------------------------|
| 47223 | 3.34 | 0.11 | 0.0004 | 0.0049 | 1.51 | sb_gmnlem_00<br>13g13.t7             | Unassigned protein                                                                                                                                                                                                                                                                                                                                                                                                          |
| 48679 | 3.11 | 0.13 | 0.0007 | 0.0072 | 1.51 | sb_gmnblits_00<br>37e21.pDNRm1<br>3r | Unassigned protein                                                                                                                                                                                                                                                                                                                                                                                                          |
| 54855 | 3.33 | 0.12 | 0.0004 | 0.0049 | 1.50 | all_v2.0.8904.C<br>1                 | unclassified<br>RING finger protein 145; n=2; Danio rerio Rep: RING finger protein 145 - Danio rerio (Zebrafish) (Brachydanio rerio)                                                                                                                                                                                                                                                                                        |
| 41930 | 2.38 | 0.20 | 0.0046 | 0.0263 | 1.50 | sb_gmnlkfta_00<br>07d04.t7           | Ygh11; n=1; Pagrus major Rep: Ygh11 - Pagrus major (Red sea bream) (Chrysophrys major)                                                                                                                                                                                                                                                                                                                                      |
| 43270 | 3.67 | 0.11 | 0.0002 | 0.0031 | 1.50 | all_v2.0.41.C3                       | Histidine-rich glycoprotein, putative; n=1; Brugia malayi Rep: Histidine-rich glycoprotein, putative - Brugia malayi (Filarial nematode worm)                                                                                                                                                                                                                                                                               |
| 37633 | 3.01 | 0.14 | 0.0009 | 0.0084 | 1.50 | all_v2.0.14171.<br>C1                | EMB2597; EMB2597 (EMBRYO DEFECTIVE 2597)                                                                                                                                                                                                                                                                                                                                                                                    |
| 44776 | 2.91 | 0.14 | 0.0011 | 0.0102 | 1.50 | all_v2.0.18388.<br>C1                | CC chemokine type 2; n=1; Gadus morhua Rep: CC chemokine type 2 - Gadus morhua (Atlantic cod)                                                                                                                                                                                                                                                                                                                               |
| 36380 | 2.83 | 0.15 | 0.0014 | 0.0118 | 1.50 | all_v2.0.132.C8                      |                                                                                                                                                                                                                                                                                                                                                                                                                             |
| 47898 | 4.18 | 0.08 | 0.0001 | 0.0020 | 1.49 | sb_gmnlla_003<br>1c09.t7             | Unassigned protein                                                                                                                                                                                                                                                                                                                                                                                                          |
| 50192 | 2.66 | 0.15 | 0.0022 | 0.0160 | 1.49 | all_v2.0.6730.C<br>1                 | unclassified                                                                                                                                                                                                                                                                                                                                                                                                                |
| 41076 | 3.44 | 0.11 | 0.0003 | 0.0042 | 1.49 | sb_gmnbspic_0<br>005116.pDNRf<br>2   | PREDICTED: similar to TPRD; n=1; Danio rerio Rep: PREDICTED: similar to TPRD - Danio rerio                                                                                                                                                                                                                                                                                                                                  |
| 49785 | 2.57 | 0.17 | 0.0028 | 0.0186 | 1.49 | all_v2.0.10614.<br>C1                | unclassified<br>Out at first protein homolog precursor; n=1; Gallus gallus Rep: Out at first protein homolog precursor - Gallus gallus (Chicken)                                                                                                                                                                                                                                                                            |
| 39825 | 4.59 | 0.07 | 0.0001 | 0.0016 | 1.49 | sb_gmnlsras_00<br>02k15.t7           |                                                                                                                                                                                                                                                                                                                                                                                                                             |
| 51763 | 2.87 | 0.14 | 0.0013 | 0.0110 | 1.49 | all_v2.0.2660.C<br>1                 | unclassified<br>Carboxy-terminal domain RNA polymerase II polypeptide A small phosphatase 1 (EC 3.1.3.16) (Nuclear LIM interactor-interacting factor 3) (NLI-interacting factor 3) (NLI-IF); n=1; Xenopus tropicalis Rep: Carboxy-terminal domain RNA polymerase II polypeptide A small phosphatase 1 (EC 3.1.3.16) (Nuclear LIM interactor-interacting factor 3) (NLI-interacting factor 3) (NLI-IF). - Xenopus tropicalis |
| 36306 | 3.07 | 0.13 | 0.0008 | 0.0077 | 1.49 | all_v2.0.2410.C<br>1                 |                                                                                                                                                                                                                                                                                                                                                                                                                             |
| 47982 | 3.10 | 0.12 | 0.0007 | 0.0073 | 1.49 | sb_gmapht_001<br>5h06.pDNRf2         | Unassigned protein<br>Lysyl-tRNA synthetase; n=3; Danio rerio Rep: Lysyl-tRNA synthetase - Brachydanio rerio (Zebrafish) (Danio rerio)                                                                                                                                                                                                                                                                                      |
| 38888 | 3.66 | 0.10 | 0.0002 | 0.0031 | 1.49 | sb_gmnbbbr_001<br>3p04.pDNRf2        | PREDICTED: similar to Protein transport protein SEC61 gamma subunit; n=1; Rattus norvegicus Rep: PREDICTED: similar to Protein transport protein SEC61 gamma subunit - Rattus norvegicus                                                                                                                                                                                                                                    |
| 40887 | 2.73 | 0.15 | 0.0019 | 0.0143 | 1.48 | all_v2.0.4163.C<br>1                 |                                                                                                                                                                                                                                                                                                                                                                                                                             |
| 46093 | 2.61 | 0.15 | 0.0025 | 0.0175 | 1.48 | all_v2.0.4918.C<br>1                 | PTH2 domain containing protein                                                                                                                                                                                                                                                                                                                                                                                              |
| 49606 | 2.75 | 0.14 | 0.0017 | 0.0136 | 1.48 | all_v2.0.13465.<br>C1                | unclassified<br>Fatty acid-binding protein, brain (B-FABP) (Brain lipid-binding protein) (BLBP) (Mammary-derived growth inhibitor related); n=5; Takifugu rubripes Rep: Fatty acid-binding protein, brain (B-FABP) (Brain lipid-binding                                                                                                                                                                                     |
| 37178 | 2.53 | 0.18 | 0.0032 | 0.0202 | 1.48 | all_v2.0.2512.C<br>1                 |                                                                                                                                                                                                                                                                                                                                                                                                                             |

|       |      |      |        |        |      |                              |                                                                                                                                                                                                                                                                                                                                                                                                                                                                                                                                                                                                                                                  |
|-------|------|------|--------|--------|------|------------------------------|--------------------------------------------------------------------------------------------------------------------------------------------------------------------------------------------------------------------------------------------------------------------------------------------------------------------------------------------------------------------------------------------------------------------------------------------------------------------------------------------------------------------------------------------------------------------------------------------------------------------------------------------------|
| 38858 | 2.44 | 0.17 | 0.0039 | 0.0233 | 1.48 | all_v2.0.3139.C1             | protein) (BLBP) (Mammary-derived growth inhibitor related). - Takifugu rubripes<br>Long neurotoxin homolog precursor; n=3; Naja Rep: Long neurotoxin homolog precursor - Naja atra (Chinese cobra)<br>Proteasome subunit beta type-9 precursor; n=7; Salmonidae Rep: Proteasome subunit beta type-9 precursor - Oncorhynchus mykiss (Rainbow trout) (Salmo gairdneri)                                                                                                                                                                                                                                                                            |
| 41434 | 4.12 | 0.08 | 0.0001 | 0.0021 | 1.48 | all_v2.0.11758.C1            |                                                                                                                                                                                                                                                                                                                                                                                                                                                                                                                                                                                                                                                  |
| 44858 | 3.55 | 0.10 | 0.0003 | 0.0036 | 1.48 | all_v2.0.5325.C1             | HECT domain containing protein                                                                                                                                                                                                                                                                                                                                                                                                                                                                                                                                                                                                                   |
| 54357 | 4.19 | 0.08 | 0.0001 | 0.0020 | 1.48 | all_v2.0.1988.C1             | unclassified<br>Family with sequence similarity 50, member A; n=3; Otophysi Rep: Family with sequence similarity 50, member A - Danio rerio (Zebrafish) (Brachydanio rerio)                                                                                                                                                                                                                                                                                                                                                                                                                                                                      |
| 37153 | 3.34 | 0.11 | 0.0004 | 0.0049 | 1.48 | all_v2.0.7254.C1             |                                                                                                                                                                                                                                                                                                                                                                                                                                                                                                                                                                                                                                                  |
| 48455 | 2.84 | 0.14 | 0.0014 | 0.0116 | 1.48 | all_v2.0.10330.C1            | Unassigned protein                                                                                                                                                                                                                                                                                                                                                                                                                                                                                                                                                                                                                               |
| 51976 | 2.58 | 0.15 | 0.0027 | 0.0182 | 1.48 | all_v2.0.5530.C4             | unclassified<br>Cytosolic nonspecific dipeptidase; n=3; Percomorpha Rep: Cytosolic nonspecific dipeptidase - Oreochromis niloticus (Nile tilapia) (Tilapia nilotica)<br>Homolog of Ictalurus punctatus Caspase 8.; n=1; Takifugu rubripes Rep: Homolog of Ictalurus punctatus Caspase 8 - Takifugu rubripes                                                                                                                                                                                                                                                                                                                                      |
| 36789 | 3.48 | 0.10 | 0.0003 | 0.0040 | 1.48 | sb_gmnlkfc_0001a07.t7        |                                                                                                                                                                                                                                                                                                                                                                                                                                                                                                                                                                                                                                                  |
| 38459 | 2.48 | 0.19 | 0.0036 | 0.0220 | 1.47 | all_v2.0.17725.C1            |                                                                                                                                                                                                                                                                                                                                                                                                                                                                                                                                                                                                                                                  |
| 52759 | 2.81 | 0.15 | 0.0015 | 0.0122 | 1.47 | all_v2.0.12814.C1            | unclassified                                                                                                                                                                                                                                                                                                                                                                                                                                                                                                                                                                                                                                     |
| 44716 | 3.01 | 0.13 | 0.0009 | 0.0085 | 1.47 | all_v2.0.10928.C1            | DUF1777 multi-domain protein                                                                                                                                                                                                                                                                                                                                                                                                                                                                                                                                                                                                                     |
| 50983 | 3.49 | 0.10 | 0.0003 | 0.0039 | 1.47 | all_v2.0.12201.C1            | unclassified                                                                                                                                                                                                                                                                                                                                                                                                                                                                                                                                                                                                                                     |
| 49048 | 4.53 | 0.06 | 0.0001 | 0.0017 | 1.47 | all_v2.0.593.C1              | unclassified                                                                                                                                                                                                                                                                                                                                                                                                                                                                                                                                                                                                                                     |
| 51491 | 3.85 | 0.09 | 0.0002 | 0.0026 | 1.47 | all_v2.0.4690.C1             | unclassified                                                                                                                                                                                                                                                                                                                                                                                                                                                                                                                                                                                                                                     |
| 47179 | 2.42 | 0.17 | 0.0042 | 0.0244 | 1.47 | all_v2.0.14321.C1            | Unassigned protein                                                                                                                                                                                                                                                                                                                                                                                                                                                                                                                                                                                                                               |
| 44794 | 2.51 | 0.18 | 0.0033 | 0.0207 | 1.47 | sb_gmnbhkas_0005o07.pDNRm13r | FAM79A; family with sequence similarity 79, member A<br>Tumor-associated calcium signal transducer 1 precursor (Major gastrointestinal tumor-associated protein GA733-2) (Epithelial cell surface antigen) (Epithelial glycoprotein) (EGP) (Adenocarcinoma-associated antigen) (KSA) (KS 1/4/2008 antigen) (Cell surface gl; n=1; Takifugu rubripes Rep: Tumor-associated calcium signal transducer 1 precursor (Major gastrointestinal tumor-associated protein GA733-2) (Epithelial cell surface antigen) (Epithelial glycoprotein) (EGP) (Adenocarcinoma-associated antigen) (KSA) (KS 1/4/2008 antigen) (Cell surface gl - Takifugu rubripes |
| 42840 | 2.80 | 0.14 | 0.0015 | 0.0124 | 1.46 | all_v2.0.5109.C1             | T-complex protein 1 subunit delta; n=4; Tetraodontidae Rep: T-complex protein 1 subunit delta - Fugu rubripes (Japanese pufferfish) (Takifugu rubripes)                                                                                                                                                                                                                                                                                                                                                                                                                                                                                          |
| 42501 | 3.25 | 0.11 | 0.0005 | 0.0056 | 1.46 | all_v2.0.11389.C1            | PREDICTED: similar to deltex 3-like (Drosophila); n=1; Danio rerio Rep: PREDICTED: similar to deltex 3-like (Drosophila) - Danio rerio                                                                                                                                                                                                                                                                                                                                                                                                                                                                                                           |
| 40396 | 2.60 | 0.16 | 0.0026 | 0.0178 | 1.46 | all_v2.0.134.C2              |                                                                                                                                                                                                                                                                                                                                                                                                                                                                                                                                                                                                                                                  |

|       |      |      |        |        |      |                            |                                                                                                                                                                                                                                                                  |
|-------|------|------|--------|--------|------|----------------------------|------------------------------------------------------------------------------------------------------------------------------------------------------------------------------------------------------------------------------------------------------------------|
| 41088 | 3.02 | 0.13 | 0.0009 | 0.0084 | 1.46 | all_v2.0.3752.C1           | PREDICTED: similar to transmembrane protein 7; n=1; Equus caballus Rep: PREDICTED: similar to transmembrane protein 7 - Equus caballus                                                                                                                           |
| 46168 | 2.67 | 0.14 | 0.0021 | 0.0157 | 1.46 | all_v2.0.4749.C2           | RNA 3'-terminal phosphate cyclase-like protein.; n=1; Takifugu rubripes                                                                                                                                                                                          |
| 40840 | 2.81 | 0.13 | 0.0015 | 0.0122 | 1.46 | sb_gmnbhkas_0018n05.pDNRf2 | PREDICTED: similar to poly (ADP-ribose) polymerase family, member 11.; n=1; Monodelphis domestica Rep: PREDICTED: similar to poly (ADP-ribose) polymerase family, member 11, - Monodelphis domestica                                                             |
| 38160 | 3.57 | 0.09 | 0.0003 | 0.0036 | 1.46 | sb_gmnlsfc_0003i11.t7      | Homolog of Homo sapiens Membrane interacting protein of RGS16; n=1; Takifugu rubripes Rep: Homolog of Homo sapiens Membrane interacting protein of RGS16 - Takifugu rubripes                                                                                     |
| 48472 | 2.92 | 0.12 | 0.0011 | 0.0101 | 1.45 | all_v2.0.18800.C1          | Unassigned protein                                                                                                                                                                                                                                               |
| 39469 | 3.28 | 0.10 | 0.0005 | 0.0054 | 1.45 | all_v2.0.12276.C1          | Novel protein similar to vertebrate EF-hand domain family, member D2; n=2; Danio rerio Rep: Novel protein similar to vertebrate EF-hand domain family, member D2 - Danio rerio (Zebrafish) (Brachydanio rerio)                                                   |
| 37749 | 2.44 | 0.16 | 0.0039 | 0.0233 | 1.45 | sb_gmapov_0007g07.pDNRm13r | Homolog of Brachydanio rerio Nucleolin.; n=1; Takifugu rubripes Rep: Homolog of Brachydanio rerio Nucleolin. - Takifugu rubripes                                                                                                                                 |
| 40052 | 2.61 | 0.16 | 0.0026 | 0.0176 | 1.45 | all_v2.0.16639.C1          | Poly [ADP-ribose] polymerase 12 (EC 2.4.2.30) (PARP-12) (Zinc finger CCCH domain-containing protein 1).; n=1; Takifugu rubripes Rep: Poly [ADP-ribose] polymerase 12 (EC 2.4.2.30) (PARP-12) (Zinc finger CCCH domain-containing protein 1). - Takifugu rubripes |
| 41397 | 3.78 | 0.08 | 0.0002 | 0.0028 | 1.45 | all_v2.0.847.C1            | Prostaglandin E synthase 3; n=5; Danio rerio Rep: Prostaglandin E synthase 3 - Danio rerio (Zebrafish) (Brachydanio rerio)                                                                                                                                       |
| 50525 | 3.57 | 0.09 | 0.0003 | 0.0036 | 1.45 | all_v2.0.832.C1            | unclassified                                                                                                                                                                                                                                                     |
| 42301 | 2.93 | 0.13 | 0.0011 | 0.0100 | 1.45 | all_v2.0.14484.C1          | Solute carrier family 25 member 36; n=3; Clupeocephala Rep: Solute carrier family 25 member 36 - Danio rerio (Zebrafish) (Brachydanio rerio)                                                                                                                     |
| 50382 | 3.04 | 0.12 | 0.0008 | 0.0080 | 1.44 | all_v2.0.9227.C1           | unclassified                                                                                                                                                                                                                                                     |
| 37282 | 2.59 | 0.14 | 0.0027 | 0.0180 | 1.44 | sb_gmnblits_0007g05.pDNRf2 | Fzb-1; n=1; Danio rerio Rep: Fzb-1 - Brachydanio rerio (Zebrafish) (Danio rerio)                                                                                                                                                                                 |
| 55038 | 2.38 | 0.17 | 0.0047 | 0.0264 | 1.44 | all_v2.0.3773.C1           | unclassified                                                                                                                                                                                                                                                     |
| 55532 | 4.01 | 0.08 | 0.0001 | 0.0022 | 1.44 | all_v2.0.10346.C1          | ZNFX1; zinc finger, NFX1-type containing 1                                                                                                                                                                                                                       |
| 52162 | 2.52 | 0.15 | 0.0032 | 0.0205 | 1.44 | all_v2.0.11655.C1          | unclassified                                                                                                                                                                                                                                                     |
| 51980 | 3.63 | 0.09 | 0.0002 | 0.0033 | 1.44 | all_v2.0.703.C1            | unclassified                                                                                                                                                                                                                                                     |
| 48995 | 3.07 | 0.12 | 0.0007 | 0.0076 | 1.44 | sb_gmnlla_0001p14.t7       | Unassigned protein                                                                                                                                                                                                                                               |
| 46606 | 3.19 | 0.11 | 0.0006 | 0.0063 | 1.44 | sb_gmnlem_00011g08.t7      | Unassigned protein                                                                                                                                                                                                                                               |
| 50881 | 2.78 | 0.13 | 0.0016 | 0.0127 | 1.43 | all_v2.0.324.C1            | unclassified                                                                                                                                                                                                                                                     |
| 38545 | 2.51 | 0.16 | 0.0033 | 0.0210 | 1.43 | all_v2.0.2319.C2           | IgD mRNA for immunoglobulin D; n=1; Takifugu rubripes Rep: IgD mRNA for immunoglobulin D - Takifugu rubripes                                                                                                                                                     |
| 44351 | 2.38 | 0.15 | 0.0047 | 0.0265 | 1.43 | all_v2.0.693.C1            | C2 domain containing protein                                                                                                                                                                                                                                     |
| 49061 | 3.39 | 0.10 | 0.0004 | 0.0045 | 1.43 | all_v2.0.10961.C1          | unclassified                                                                                                                                                                                                                                                     |

|       |      |      |        |        |      |                              |                                                                                                                                                                                                        |
|-------|------|------|--------|--------|------|------------------------------|--------------------------------------------------------------------------------------------------------------------------------------------------------------------------------------------------------|
| 50535 | 3.31 | 0.10 | 0.0004 | 0.0051 | 1.43 | all_v2.0.8723.C1             | unclassified                                                                                                                                                                                           |
|       |      |      |        |        |      |                              | DnaJ-like subfamily A member 4; n=1; Paralichthys olivaceus Rep: DnaJ-like subfamily A member 4 - Paralichthys olivaceus (Japanese flounder)                                                           |
| 36923 | 3.41 | 0.09 | 0.0003 | 0.0044 | 1.43 | sb_gmapov_0012f15.pDNRF2     | Si:dkey-21k10.1 protein; n=3; Danio rerio Rep: Si:dkey-21k10.1 protein - Danio rerio (Zebrafish) (Brachydanio rerio)                                                                                   |
| 42172 | 2.92 | 0.13 | 0.0011 | 0.0101 | 1.43 | sb_gmnl1a_0045h19.t7         |                                                                                                                                                                                                        |
| 50297 | 3.10 | 0.11 | 0.0007 | 0.0073 | 1.43 | all_v2.0.12538.C1            | unclassified                                                                                                                                                                                           |
| 50934 | 3.49 | 0.09 | 0.0003 | 0.0039 | 1.43 | all_v2.0.1022.C3             | unclassified                                                                                                                                                                                           |
| 50913 | 4.77 | 0.05 | 0.0001 | 0.0015 | 1.43 | all_v2.0.3093.C1             | unclassified                                                                                                                                                                                           |
| 49047 | 2.66 | 0.14 | 0.0023 | 0.0162 | 1.43 | all_v2.0.11108.C4            | unclassified                                                                                                                                                                                           |
|       |      |      |        |        |      |                              | Novel NACHT domain containing protein; n=2; Danio rerio Rep: Novel NACHT domain containing protein - Danio rerio (Zebrafish) (Brachydanio rerio)                                                       |
| 39384 | 2.70 | 0.14 | 0.0020 | 0.0150 | 1.42 | all_v2.0.3955.C1             | Vacuolar protein-sorting-associated protein 25; n=6; Clupeocephala Rep: Vacuolar protein-sorting-associated protein 25 - Danio rerio (Zebrafish) (Brachydanio rerio)                                   |
| 43169 | 3.17 | 0.10 | 0.0006 | 0.0065 | 1.42 | all_v2.0.927.C1              |                                                                                                                                                                                                        |
| 51058 | 2.64 | 0.13 | 0.0023 | 0.0165 | 1.42 | all_v2.0.11781.C2            | unclassified                                                                                                                                                                                           |
| 46677 | 2.66 | 0.14 | 0.0022 | 0.0161 | 1.42 | all_v2.0.4.C247              | Unassigned protein                                                                                                                                                                                     |
| 48710 | 2.64 | 0.13 | 0.0023 | 0.0165 | 1.42 | all_v2.0.10234.C1            | Unassigned protein                                                                                                                                                                                     |
|       |      |      |        |        |      |                              | Vacuolar protein sorting-associated protein 13B (Cohen syndrome protein 1); n=1; Takifugu rubripes Rep: Vacuolar protein sorting-associated protein 13B (Cohen syndrome protein 1) - Takifugu rubripes |
| 43155 | 3.77 | 0.08 | 0.0002 | 0.0028 | 1.42 | sb_gmnbpcic_0007k03.pDNRF2   | O-GlcNAc transferase variant 4; n=8; Euteleostomi Rep: O-GlcNAc transferase variant 4 - Danio rerio (Zebrafish) (Brachydanio rerio)                                                                    |
| 39789 | 2.81 | 0.12 | 0.0015 | 0.0122 | 1.42 | sb_gmnlrsas_0001e04.t7       | ZNF658; zinc finger protein 658; K09228                                                                                                                                                                |
| 55531 | 5.08 | 0.04 | 0.0000 | 0.0014 | 1.42 | all_v2.0.13201.C1            | KRAB domain-containing zinc finger protein                                                                                                                                                             |
| 36967 | 3.00 | 0.12 | 0.0009 | 0.0086 | 1.42 | sb_gmnbhkas_0014o03.pDNRM13r | E3 SUMO-protein ligase RanBP2; n=3; Homo sapiens Rep: E3 SUMO-protein ligase RanBP2 - Homo sapiens (Human)                                                                                             |
| 35574 | 3.93 | 0.07 | 0.0001 | 0.0024 | 1.42 | sb_gmnlrsic_0003f13.t7       | 26S proteasome regulatory subunit IV; n=2; Embryophyta Rep: 26S proteasome regulatory subunit IV - Tortula ruralis (Star moss) (Twisted moss)                                                          |
| 48214 | 3.18 | 0.10 | 0.0006 | 0.0063 | 1.42 | sb_gmnbhkas_0014f23.pDNRM13r | Unassigned protein                                                                                                                                                                                     |
|       |      |      |        |        |      |                              | Homolog of Brachydanio rerio Microspherule protein 1.; n=1; Takifugu rubripes Rep: Homolog of Brachydanio rerio Microspherule protein 1 - Takifugu rubripes                                            |
| 37738 | 3.46 | 0.09 | 0.0003 | 0.0041 | 1.41 | sb_gmnbhkcic_0007m23.pDNRF2  |                                                                                                                                                                                                        |
| 54293 | 3.80 | 0.08 | 0.0002 | 0.0027 | 1.41 | all_v2.0.5441.C1             | unclassified                                                                                                                                                                                           |
| 49108 | 2.50 | 0.15 | 0.0034 | 0.0213 | 1.41 | all_v2.0.210.C1              | unclassified                                                                                                                                                                                           |
| 53802 | 2.70 | 0.13 | 0.0020 | 0.0149 | 1.41 | all_v2.0.6636.C2             | unclassified                                                                                                                                                                                           |
|       |      |      |        |        |      |                              | Small ubiquitin-related modifier 3 precursor; n=3; Catarrhini Rep: Small ubiquitin-related modifier 3 precursor - Homo sapiens (Human)                                                                 |
| 42254 | 2.77 | 0.13 | 0.0016 | 0.0130 | 1.41 | all_v2.0.1577.C1             |                                                                                                                                                                                                        |

|       |      |      |        |        |      |                            |                                                                                                                                                                                                                                                                                                                                                                  |
|-------|------|------|--------|--------|------|----------------------------|------------------------------------------------------------------------------------------------------------------------------------------------------------------------------------------------------------------------------------------------------------------------------------------------------------------------------------------------------------------|
| 52306 | 4.19 | 0.06 | 0.0001 | 0.0020 | 1.41 | all_v2.0.14732.C1          | unclassified                                                                                                                                                                                                                                                                                                                                                     |
| 39852 | 2.74 | 0.13 | 0.0018 | 0.0138 | 1.41 | all_v2.0.1325.C1           | Pantophysin; n=3; Gadidae Rep: Pantophysin - Melanogrammus aeglefinus (Haddock)                                                                                                                                                                                                                                                                                  |
| 54648 | 3.21 | 0.09 | 0.0005 | 0.0060 | 1.41 | all_v2.0.12243.C1          | unclassified                                                                                                                                                                                                                                                                                                                                                     |
| 50854 | 2.88 | 0.11 | 0.0012 | 0.0107 | 1.41 | all_v2.0.7384.C1           | unclassified                                                                                                                                                                                                                                                                                                                                                     |
| 38108 | 2.63 | 0.13 | 0.0024 | 0.0170 | 1.41 | sb_gmnlbric_0007j22.t7     | Homolog of Homo sapiens Inhibitor of nuclear factor kappa-B kinase alpha subunit; n=1; Takifugu rubripes Rep: Homolog of Homo sapiens Inhibitor of nuclear factor kappa-B kinase alpha subunit - Takifugu rubripes                                                                                                                                               |
| 38165 | 2.65 | 0.12 | 0.0023 | 0.0163 | 1.40 | sb_gmapov_0007h19.pDNRm13r | Homolog of Homo sapiens MGC4645 protein; n=1; Takifugu rubripes Rep: Homolog of Homo sapiens MGC4645 protein - Takifugu rubripes                                                                                                                                                                                                                                 |
| 51890 | 3.26 | 0.09 | 0.0005 | 0.0055 | 1.40 | all_v2.0.13745.C1          | unclassified                                                                                                                                                                                                                                                                                                                                                     |
| 38483 | 2.69 | 0.12 | 0.0021 | 0.0152 | 1.40 | all_v2.0.3163.C5           | Homolog of Pagrus major Protein-glutamine gamma-glutamyltransferase (EC 2.3.2.13) (Tissue transglutaminase) (TGase C) (TGC) (TG(C)) (Tranglutaminase 2); n=1; Takifugu rubripes Rep: Homolog of Pagrus major Protein-glutamine gamma-glutamyltransferase (EC 2.3.2.13) (Tissue transglutaminase) (TGase C) (TGC) (TG(C)) (Tranglutaminase 2) - Takifugu rubripes |
| 40166 | 2.55 | 0.14 | 0.0030 | 0.0192 | 1.40 | sb_gmnlbric_0007l18.t7     | PREDICTED: similar to 24-dehydrocholesterol reductase; n=1; Danio rerio Rep: PREDICTED: similar to 24-dehydrocholesterol reductase - Danio rerio                                                                                                                                                                                                                 |
| 54819 | 2.79 | 0.12 | 0.0016 | 0.0125 | 1.40 | all_v2.0.14839.C1          | unclassified                                                                                                                                                                                                                                                                                                                                                     |
| 51059 | 3.00 | 0.10 | 0.0009 | 0.0086 | 1.40 | all_v2.0.690.C5            | unclassified                                                                                                                                                                                                                                                                                                                                                     |
| 36400 | 2.39 | 0.14 | 0.0045 | 0.0257 | 1.40 | all_v2.0.7561.C1           | CD40; n=1; Paralichthys olivaceus Rep: CD40 - Paralichthys olivaceus (Japanese flounder)                                                                                                                                                                                                                                                                         |
| 37641 | 2.67 | 0.12 | 0.0022 | 0.0159 | 1.40 | all_v2.0.285.C1            | Histone deacetylase complex subunit SAP18; n=19; Euteleostomi Rep: Histone deacetylase complex subunit SAP18 - Homo sapiens (Human)                                                                                                                                                                                                                              |
| 40559 | 2.51 | 0.13 | 0.0033 | 0.0208 | 1.40 | sb_gmapht_0007j13.pDNRf2   | PREDICTED: similar to Importin alpha-1 subunit (Karyopherin alpha-1 subunit) (SRP1-beta) (RAG cohort protein 2) (Nucleoprotein interactor 1) (NPI-1), partial; n=1; Danio rerio Rep: PREDICTED: similar to Importin alpha-1 subunit (Karyopherin alpha-1 subunit) (SRP1-beta) (RAG cohort protein 2) (Nucleoprotein interactor 1) (NPI-1), partial - Danio rerio |
| 48510 | 4.45 | 0.05 | 0.0001 | 0.0017 | 1.40 | sb_gmnl1a_0005h19.t7       | Unassigned protein                                                                                                                                                                                                                                                                                                                                               |
| 48825 | 3.06 | 0.10 | 0.0008 | 0.0078 | 1.40 | sb_gmnl1a_0004a24.t7       | Unassigned protein                                                                                                                                                                                                                                                                                                                                               |
| 55410 | 2.64 | 0.13 | 0.0023 | 0.0165 | 1.40 | all_v2.0.12831.C1          | unclassified                                                                                                                                                                                                                                                                                                                                                     |
| 38414 | 2.93 | 0.11 | 0.0011 | 0.0099 | 1.40 | sb_gmnl1a_0008p21.sp6      | Homolog of Homo sapiens TRA@ protein; n=8; Takifugu rubripes Rep: Homolog of Homo sapiens TRA@ protein - Takifugu rubripes                                                                                                                                                                                                                                       |
| 38631 | 3.71 | 0.07 | 0.0002 | 0.0030 | 1.40 | all_v2.0.8520.C1           | Interleukin-11a; n=2; Takifugu rubripes Rep: Interleukin-11a - Fugu rubripes (Japanese pufferfish) (Takifugu rubripes)                                                                                                                                                                                                                                           |



|       |      |      |        |        |      |                            |                                                                                                                                                                                                                    |
|-------|------|------|--------|--------|------|----------------------------|--------------------------------------------------------------------------------------------------------------------------------------------------------------------------------------------------------------------|
| 55249 | 2.47 | 0.13 | 0.0036 | 0.0221 | 1.39 | all_v2.0.3039.C5           | unclassified                                                                                                                                                                                                       |
| 49081 | 2.87 | 0.10 | 0.0013 | 0.0109 | 1.39 | all_v2.0.4460.C1           | unclassified<br>phosphatidylinositol-specific phospholipase C, X domain containing 1; n=1; Takifugu rubripes Rep: phosphatidylinositol-specific phospholipase C, X domain containing 1 - Takifugu rubripes         |
| 39952 | 2.44 | 0.15 | 0.0040 | 0.0235 | 1.39 | all_v2.0.6525.C1           | Glycerol-3-phosphate dehydrogenase 1-like protein (EC 1.1.1.8); n=1; Takifugu rubripes Rep: Glycerol-3-phosphate dehydrogenase 1-like protein (EC 1.1.1.8). - Takifugu rubripes                                    |
| 37404 | 2.41 | 0.15 | 0.0043 | 0.0249 | 1.39 | all_v2.0.10850.C1          | PREDICTED: heat shock 70kDa protein 5 (glucose-regulated protein, 78kDa) isoform 1; n=1; Pan troglodytes Rep: PREDICTED: heat shock 70kDa protein 5 (glucose-regulated protein, 78kDa) isoform 1 - Pan troglodytes |
| 40138 | 2.60 | 0.13 | 0.0026 | 0.0176 | 1.39 | all_v2.0.14727.C1          |                                                                                                                                                                                                                    |
| 53993 | 3.22 | 0.09 | 0.0005 | 0.0060 | 1.39 | all_v2.0.9743.C1           | unclassified<br>U3 small nucleolar RNA-associated protein 15 homolog; n=1; Gallus gallus Rep: U3 small nucleolar RNA-associated protein 15 homolog - Gallus gallus (Chicken)                                       |
| 42879 | 2.50 | 0.13 | 0.0034 | 0.0212 | 1.39 | all_v2.0.14074.C1          | UPI0000D8C23B related cluster; n=1; Danio rerio Rep: UPI0000D8C23B UniRef100 entry - Danio rerio                                                                                                                   |
| 43024 | 2.62 | 0.12 | 0.0024 | 0.0171 | 1.38 | all_v2.0.17625.C1          | Protein YIPF6; n=4; Danio rerio Rep: Protein YIPF6 - Danio rerio (Zebrafish) (Brachydanio rerio)                                                                                                                   |
| 41548 | 2.44 | 0.13 | 0.0039 | 0.0233 | 1.38 | all_v2.0.2626.C1           |                                                                                                                                                                                                                    |
| 50340 | 2.70 | 0.11 | 0.0020 | 0.0150 | 1.38 | all_v2.0.3758.C1           | unclassified                                                                                                                                                                                                       |
| 48320 | 3.50 | 0.08 | 0.0003 | 0.0039 | 1.38 | all_v2.0.74.C2             | Unassigned protein                                                                                                                                                                                                 |
| 51423 | 2.66 | 0.12 | 0.0022 | 0.0161 | 1.38 | all_v2.0.7996.C1           | unclassified                                                                                                                                                                                                       |
| 44205 | 3.08 | 0.09 | 0.0007 | 0.0075 | 1.38 | all_v2.0.8912.C1           | [J] COG1358 Ribosomal protein HS6-type (S12/L30/L7a)                                                                                                                                                               |
| 55014 | 3.68 | 0.07 | 0.0002 | 0.0031 | 1.38 | all_v2.0.14410.C1          | unclassified                                                                                                                                                                                                       |
| 46732 | 3.55 | 0.07 | 0.0003 | 0.0036 | 1.38 | sb_gmnlem_0027j18.t7       | Unassigned protein<br>sphingolipid C4-hydroxylase/delta 4-desaturase; n=1; Takifugu rubripes Rep: sphingolipid C4-hydroxylase/delta 4-desaturase - Takifugu rubripes                                               |
| 42340 | 2.80 | 0.11 | 0.0015 | 0.0124 | 1.38 | all_v2.0.7989.C1           |                                                                                                                                                                                                                    |
| 49698 | 2.74 | 0.12 | 0.0018 | 0.0139 | 1.38 | all_v2.0.7758.C1           | unclassified<br>Pol polyprotein; n=1; Nosema bombycis Rep: Pol polyprotein - Nosema bombycis                                                                                                                       |
| 40018 | 2.84 | 0.10 | 0.0014 | 0.0115 | 1.38 | all_v2.0.7260.C1           |                                                                                                                                                                                                                    |
| 47688 | 2.52 | 0.12 | 0.0032 | 0.0203 | 1.38 | sb_gmnlla_0002n10.t7       | Unassigned protein<br>LOC485766; similar to serine palmitoyltransferase, long chain base subunit 2                                                                                                                 |
| 45108 | 2.84 | 0.11 | 0.0014 | 0.0114 | 1.38 | all_v2.0.12306.C1          | PREDICTED: similar to ankyrin 2, neuronal; n=1; Danio rerio Rep: PREDICTED: similar to ankyrin 2, neuronal, - Danio rerio                                                                                          |
| 40216 | 2.38 | 0.13 | 0.0046 | 0.0263 | 1.37 | sb_gmapte_0010k12.pDNRm13r | PREDICTED: similar to Zinc finger protein 319; n=1; Danio rerio Rep: PREDICTED: similar to Zinc finger protein 319 - Danio rerio                                                                                   |
| 41233 | 2.63 | 0.12 | 0.0024 | 0.0170 | 1.37 | sb_gmapov_0002e13.pDNRf2   | Protein pelota homolog; n=1; Danio rerio Rep: Protein pelota homolog - Brachydanio rerio (Zebrafish) (Danio                                                                                                        |
| 41512 | 3.91 | 0.06 | 0.0001 | 0.0024 | 1.37 | sb_gmapov_0012p05.pDNRm13r |                                                                                                                                                                                                                    |

|       |      |      |        |        |      |                           |  |  |  |  | erio)                                                                                                                                                                                                                                                                                                                                                                                                                |
|-------|------|------|--------|--------|------|---------------------------|--|--|--|--|----------------------------------------------------------------------------------------------------------------------------------------------------------------------------------------------------------------------------------------------------------------------------------------------------------------------------------------------------------------------------------------------------------------------|
|       |      |      |        |        |      |                           |  |  |  |  | RecA homolog Dmc1; n=4;<br>Elopocephala Rep: RecA homolog Dmc1 -<br>Oreochromis niloticus (Nile tilapia)<br>(Tilapia nilotica)                                                                                                                                                                                                                                                                                       |
| 41719 | 2.57 | 0.12 | 0.0028 | 0.0185 | 1.37 | all_v2.0.12252.C1         |  |  |  |  |                                                                                                                                                                                                                                                                                                                                                                                                                      |
| 44658 | 2.55 | 0.12 | 0.0030 | 0.0194 | 1.37 | sb_gmapht_0008n23.pDNRF2  |  |  |  |  | DNA_pol_V domain containing protein<br>Biglycan-like protein 3; n=1; Oreochromis<br>niloticus Rep: Biglycan-like protein 3 -<br>Oreochromis niloticus (Nile tilapia)<br>(Tilapia nilotica)                                                                                                                                                                                                                           |
| 36171 | 3.04 | 0.09 | 0.0008 | 0.0081 | 1.37 | sb_gmnbhkc_0003b04.pDNRF2 |  |  |  |  |                                                                                                                                                                                                                                                                                                                                                                                                                      |
| 54214 | 2.48 | 0.12 | 0.0036 | 0.0220 | 1.37 | all_v2.0.7211.C1          |  |  |  |  | unclassified<br>Proteasome subunit beta type; n=5;<br>Salmonidae Rep: Proteasome subunit beta<br>type - Salmo salar (Atlantic salmon)                                                                                                                                                                                                                                                                                |
| 41431 | 4.47 | 0.04 | 0.0001 | 0.0017 | 1.36 | all_v2.0.15734.C1         |  |  |  |  |                                                                                                                                                                                                                                                                                                                                                                                                                      |
| 45788 | 2.53 | 0.12 | 0.0032 | 0.0202 | 1.36 | all_v2.0.11742.C1         |  |  |  |  | non-directed                                                                                                                                                                                                                                                                                                                                                                                                         |
| 45507 | 4.00 | 0.05 | 0.0001 | 0.0022 | 1.36 | all_v2.0.13496.C1         |  |  |  |  | non-directed<br>Cell division cycle 5-like protein; n=18;<br>Amniota Rep: Cell division cycle 5-like<br>protein - Homo sapiens (Human)<br>Fance protein; n=4; Danio rerio Rep:<br>Fance protein - Danio rerio (Zebrafish)<br>(Brachydanio rerio)                                                                                                                                                                     |
| 36428 | 2.45 | 0.13 | 0.0039 | 0.0231 | 1.36 | all_v2.0.5302.C1          |  |  |  |  |                                                                                                                                                                                                                                                                                                                                                                                                                      |
| 37158 | 3.45 | 0.07 | 0.0003 | 0.0042 | 1.36 | all_v2.0.11686.C1         |  |  |  |  | Asialoglycoprotein receptor 1 (ASGPR 1)<br>(ASGP-R 1) (Hepatic lectin H1).; n=1;<br>Takifugu rubripes Rep: Asialoglycoprotein<br>receptor 1 (ASGPR 1) (ASGP-R 1)<br>(Hepatic lectin H1). - Takifugu rubripes                                                                                                                                                                                                         |
| 36002 | 2.82 | 0.10 | 0.0014 | 0.0119 | 1.36 | all_v2.0.13332.C1         |  |  |  |  | unclassified                                                                                                                                                                                                                                                                                                                                                                                                         |
| 50069 | 2.63 | 0.11 | 0.0024 | 0.0170 | 1.36 | all_v2.0.17582.C1         |  |  |  |  | unclassified                                                                                                                                                                                                                                                                                                                                                                                                         |
| 52009 | 2.93 | 0.09 | 0.0011 | 0.0099 | 1.36 | all_v2.0.17459.C1         |  |  |  |  | unclassified<br>Cathepsin L; n=2; Percomorpha Rep:<br>Cathepsin L - Lates calcarifer<br>(Barramundi)<br>Zgc:92287; n=2; Danio rerio Rep:<br>Zgc:92287 - Danio rerio (Zebrafish)<br>(Brachydanio rerio)                                                                                                                                                                                                               |
| 36367 | 3.08 | 0.08 | 0.0007 | 0.0075 | 1.36 | all_v2.0.1055.C2          |  |  |  |  |                                                                                                                                                                                                                                                                                                                                                                                                                      |
| 44069 | 3.72 | 0.06 | 0.0002 | 0.0029 | 1.36 | all_v2.0.2597.C1          |  |  |  |  | Anterior gradient-2-like protein 2; n=2;<br>Salmo salar Rep: Anterior gradient-2-like<br>protein 2 - Salmo salar (Atlantic salmon)<br>Prmt1 protein; n=2; Danio rerio Rep:<br>Prmt1 protein - Brachydanio rerio<br>(Zebrafish) (Danio rerio)                                                                                                                                                                         |
| 35937 | 2.54 | 0.12 | 0.0031 | 0.0197 | 1.36 | all_v2.0.5783.C1          |  |  |  |  |                                                                                                                                                                                                                                                                                                                                                                                                                      |
| 41308 | 2.63 | 0.11 | 0.0024 | 0.0170 | 1.36 | sb_gmnlfta_0002a10.t7     |  |  |  |  |                                                                                                                                                                                                                                                                                                                                                                                                                      |
| 49766 | 2.92 | 0.09 | 0.0011 | 0.0101 | 1.35 | all_v2.0.15335.C1         |  |  |  |  | unclassified                                                                                                                                                                                                                                                                                                                                                                                                         |
| 47347 | 2.40 | 0.12 | 0.0044 | 0.0254 | 1.35 | sb_gmlbgits_0004o24.sp6   |  |  |  |  | Unassigned protein                                                                                                                                                                                                                                                                                                                                                                                                   |
| 44888 | 2.52 | 0.11 | 0.0032 | 0.0205 | 1.35 | sb_gmapov_0013f02.pDNRF2  |  |  |  |  | Hkr3; GLI-Kruppel family member HKR3<br>Eukaryotic translation initiation factor 4E;<br>n=5; Xenopus Rep: Eukaryotic translation<br>initiation factor 4E - Xenopus laevis<br>(African clawed frog)<br>Translocon-associated protein subunit<br>alpha precursor; n=1; Oncorhynchus<br>mykiss Rep: Translocon-associated protein<br>subunit alpha precursor - Oncorhynchus<br>mykiss (Rainbow trout) (Salmo gairdneri) |
| 37118 | 2.62 | 0.11 | 0.0024 | 0.0171 | 1.35 | all_v2.0.2012.C1          |  |  |  |  |                                                                                                                                                                                                                                                                                                                                                                                                                      |
| 42695 | 2.58 | 0.11 | 0.0027 | 0.0182 | 1.35 | all_v2.0.13546.C1         |  |  |  |  |                                                                                                                                                                                                                                                                                                                                                                                                                      |
| 50704 | 2.71 | 0.10 | 0.0019 | 0.0148 | 1.35 | all_v2.0.4181.C1          |  |  |  |  | unclassified<br>Zgc:136585; n=3; Danio rerio Rep:<br>Zgc:136585 - Brachydanio rerio<br>(Zebrafish) (Danio rerio)<br>Zgc:110354; n=3; Danio rerio Rep:<br>Zgc:110354 - Danio rerio (Zebrafish)<br>(Brachydanio rerio)                                                                                                                                                                                                 |
| 43609 | 3.01 | 0.09 | 0.0009 | 0.0084 | 1.35 | sb_gmnbmd_0004p22.t7      |  |  |  |  |                                                                                                                                                                                                                                                                                                                                                                                                                      |
| 43434 | 2.53 | 0.12 | 0.0031 | 0.0198 | 1.35 | all_v2.0.14566.C1         |  |  |  |  |                                                                                                                                                                                                                                                                                                                                                                                                                      |

|       |      |      |        |        |      |                              |                                                                                                                                                                                                                                               |
|-------|------|------|--------|--------|------|------------------------------|-----------------------------------------------------------------------------------------------------------------------------------------------------------------------------------------------------------------------------------------------|
| 48545 | 2.79 | 0.10 | 0.0016 | 0.0125 | 1.34 | sb_gmlbgits_00<br>04e18.sp6  | Unassigned protein                                                                                                                                                                                                                            |
| 53244 | 3.85 | 0.05 | 0.0002 | 0.0026 | 1.34 | all_v2.0.1478.C<br>3         | unclassified<br>Heat shock protein 90Ae.; n=1; Takifugu<br>rubripes Rep: Heat shock protein 90Ae. -<br>Takifugu rubripes                                                                                                                      |
| 37566 | 2.39 | 0.12 | 0.0045 | 0.0257 | 1.34 | all_v2.0.2479.C<br>1         | unclassified                                                                                                                                                                                                                                  |
| 51355 | 2.38 | 0.12 | 0.0046 | 0.0261 | 1.34 | all_v2.0.154.C1              | Zgc:92254; n=2; Danio rerio Rep:<br>Zgc:92254 - Danio rerio (Zebrafish)<br>(Brachydanio rerio)                                                                                                                                                |
| 44066 | 2.81 | 0.09 | 0.0015 | 0.0122 | 1.34 | all_v2.0.7765.C<br>1         | Homolog of Homo sapiens Transport-<br>secretion protein 2.2; n=1; Takifugu<br>rubripes Rep: Homolog of Homo sapiens<br>Transport-secretion protein 2.2 - Takifugu<br>rubripes                                                                 |
| 38422 | 2.48 | 0.12 | 0.0036 | 0.0220 | 1.34 | sb_gmapov_001<br>9e16.pDNRF2 | Unassigned protein                                                                                                                                                                                                                            |
| 46704 | 2.38 | 0.13 | 0.0047 | 0.0264 | 1.34 | sb_gmlla_003<br>4c04.t7      | Armadillo repeat protein deleted in velo-<br>cardio-facial syndrome.; n=1; Takifugu<br>rubripes Rep: Armadillo repeat protein<br>deleted in velo-cardio-facial syndrome. -<br>Takifugu rubripes                                               |
| 35985 | 3.28 | 0.07 | 0.0005 | 0.0054 | 1.34 | all_v2.0.17834.<br>C1        | unclassified                                                                                                                                                                                                                                  |
| 54760 | 3.00 | 0.09 | 0.0009 | 0.0086 | 1.34 | all_v2.0.5450.C<br>1         | Unassigned protein                                                                                                                                                                                                                            |
| 46490 | 2.72 | 0.10 | 0.0019 | 0.0144 | 1.34 | sb_gmbmu_00<br>06k01.pDNRF2  | unclassified                                                                                                                                                                                                                                  |
| 51413 | 2.73 | 0.10 | 0.0018 | 0.0142 | 1.34 | all_v2.0.318.C3              | unclassified                                                                                                                                                                                                                                  |
| 50515 | 2.46 | 0.11 | 0.0037 | 0.0225 | 1.34 | all_v2.0.7899.C<br>1         | unclassified                                                                                                                                                                                                                                  |
| 53667 | 2.70 | 0.09 | 0.0020 | 0.0151 | 1.34 | all_v2.0.2943.C<br>1         | unclassified<br>PREDICTED: transcription elongation<br>factor B (SIII), polypeptide 2 (18kD,<br>elongin B); n=1; Danio rerio Rep:<br>PREDICTED: transcription elongation<br>factor B (SIII), polypeptide 2 (18kD,<br>elongin B) - Danio rerio |
| 41285 | 2.93 | 0.08 | 0.0011 | 0.0098 | 1.34 | sb_gmapov_000<br>3j06.pDNRF2 | unclassified                                                                                                                                                                                                                                  |
| 49161 | 2.61 | 0.10 | 0.0025 | 0.0175 | 1.33 | all_v2.0.7045.C<br>1         | unclassified                                                                                                                                                                                                                                  |
| 50493 | 3.74 | 0.05 | 0.0002 | 0.0029 | 1.33 | all_v2.0.7812.C<br>1         | unclassified                                                                                                                                                                                                                                  |
| 54330 | 2.48 | 0.12 | 0.0036 | 0.0221 | 1.33 | all_v2.0.13602.<br>C1        | unclassified<br>RAS guanyl-releasing protein 1; n=3;<br>Xenopus Rep: RAS guanyl-releasing<br>protein 1 - Xenopus laevis (African<br>clawed frog)                                                                                              |
| 41690 | 3.57 | 0.06 | 0.0003 | 0.0036 | 1.33 | all_v2.0.901.C1              | unclassified                                                                                                                                                                                                                                  |
| 55069 | 2.41 | 0.11 | 0.0043 | 0.0250 | 1.33 | all_v2.0.5005.C<br>1         | Prmt1 protein; n=2; Danio rerio Rep:<br>Prmt1 protein - Danio rerio (Zebrafish)<br>(Brachydanio rerio)                                                                                                                                        |
| 41309 | 3.13 | 0.08 | 0.0007 | 0.0069 | 1.33 | all_v2.0.1996.C<br>1         | unclassified                                                                                                                                                                                                                                  |
| 53627 | 2.57 | 0.10 | 0.0028 | 0.0187 | 1.33 | all_v2.0.20.C2               | MGC115621 protein; n=1; Xenopus<br>laevis Rep: MGC115621 protein -<br>Xenopus laevis (African clawed frog)                                                                                                                                    |
| 38998 | 2.43 | 0.11 | 0.0041 | 0.0241 | 1.33 | sb_gmlem_00<br>24i03.t7      | Heat shock protein 94c.; n=1; Takifugu<br>rubripes Rep: Heat shock protein 94c. -<br>Takifugu rubripes                                                                                                                                        |
| 37568 | 2.43 | 0.11 | 0.0040 | 0.0238 | 1.33 | all_v2.0.5461.C<br>1         | unclassified                                                                                                                                                                                                                                  |
| 49538 | 2.44 | 0.11 | 0.0039 | 0.0233 | 1.33 | all_v2.0.17441.<br>C1        | unclassified                                                                                                                                                                                                                                  |
| 46452 | 2.56 | 0.11 | 0.0029 | 0.0188 | 1.33 | all_v2.0.3031.C<br>1         | Unassigned protein                                                                                                                                                                                                                            |
| 55082 | 2.68 | 0.10 | 0.0021 | 0.0155 | 1.33 | all_v2.0.1181.C<br>1         | unclassified                                                                                                                                                                                                                                  |
| 36192 | 2.97 | 0.08 | 0.0010 | 0.0090 | 1.32 | all_v2.0.661.C4<br>0         | Bloodthirsty; n=2; Notothenioidei Rep:<br>Bloodthirsty - Chaenocephalus aceratus<br>(White crocodile fish)                                                                                                                                    |

|       |      |      |        |        |      |                                    |                                                                                                                                                                                                                                                                                                                                                                                                                                                                                                                                         |
|-------|------|------|--------|--------|------|------------------------------------|-----------------------------------------------------------------------------------------------------------------------------------------------------------------------------------------------------------------------------------------------------------------------------------------------------------------------------------------------------------------------------------------------------------------------------------------------------------------------------------------------------------------------------------------|
| 55489 | 2.43 | 0.10 | 0.0041 | 0.0239 | 1.32 | sb_gmapht_004<br>2b22.pDNRm1<br>3r | zf-BED domain containing protein<br>PREDICTED: similar to KPL2; n=1;<br>Ornithorhynchus anatinus Rep:<br>PREDICTED: similar to KPL2 -<br>Ornithorhynchus anatinus                                                                                                                                                                                                                                                                                                                                                                       |
| 40604 | 2.39 | 0.11 | 0.0045 | 0.0257 | 1.32 | sb_gmapte_001<br>0i04.pDNRm13<br>r |                                                                                                                                                                                                                                                                                                                                                                                                                                                                                                                                         |
| 50319 | 3.09 | 0.07 | 0.0007 | 0.0074 | 1.32 | all_v2.0.15552.<br>C1              | unclassified                                                                                                                                                                                                                                                                                                                                                                                                                                                                                                                            |
| 52277 | 3.44 | 0.06 | 0.0003 | 0.0042 | 1.32 | all_v2.0.10829.<br>C1              | unclassified                                                                                                                                                                                                                                                                                                                                                                                                                                                                                                                            |
| 51417 | 3.55 | 0.06 | 0.0003 | 0.0036 | 1.32 | all_v2.0.3611.C<br>1               | unclassified                                                                                                                                                                                                                                                                                                                                                                                                                                                                                                                            |
| 49834 | 3.63 | 0.05 | 0.0002 | 0.0033 | 1.32 | all_v2.0.12788.<br>C1              | unclassified                                                                                                                                                                                                                                                                                                                                                                                                                                                                                                                            |
| 48601 | 2.52 | 0.10 | 0.0032 | 0.0205 | 1.32 | sb_gmlla_004<br>5m15.t7            | Unassigned protein                                                                                                                                                                                                                                                                                                                                                                                                                                                                                                                      |
| 37096 | 2.38 | 0.11 | 0.0047 | 0.0266 | 1.32 | all_v2.0.624.C1                    | Eukaryotic translation initiation factor 2<br>subunit 1; n=22; Euteleostomi Rep:<br>Eukaryotic translation initiation factor 2<br>subunit 1 - Homo sapiens (Human)<br>Proteasome subunit alpha type; n=2;<br>Tetraodontidae Rep: Proteasome subunit<br>alpha type - Tetraodon nigroviridis (Green<br>puffer)                                                                                                                                                                                                                            |
| 41416 | 2.76 | 0.08 | 0.0017 | 0.0132 | 1.32 | all_v2.0.15427.<br>C1              |                                                                                                                                                                                                                                                                                                                                                                                                                                                                                                                                         |
| 45703 | 2.39 | 0.11 | 0.0046 | 0.0260 | 1.31 | all_v2.0.2158.C<br>2               | non-directed<br>Der1-like domain family, member 1; n=4;<br>Danio rerio Rep: Der1-like domain family,<br>member 1 - Danio rerio (Zebrafish)<br>(Brachydanio rerio)<br>Zgc:64051; n=1; Danio rerio Rep:<br>Zgc:64051 - Danio rerio (Zebrafish)<br>(Brachydanio rerio)                                                                                                                                                                                                                                                                     |
| 36843 | 2.50 | 0.10 | 0.0034 | 0.0212 | 1.31 | sb_gmnlfas_00<br>03o17.t7          |                                                                                                                                                                                                                                                                                                                                                                                                                                                                                                                                         |
| 43891 | 2.70 | 0.09 | 0.0020 | 0.0151 | 1.31 | all_v2.0.6116.C<br>1               |                                                                                                                                                                                                                                                                                                                                                                                                                                                                                                                                         |
| 48805 | 2.47 | 0.11 | 0.0037 | 0.0222 | 1.31 | sb_gmnlem_00<br>07p04.sp6          | Unassigned protein                                                                                                                                                                                                                                                                                                                                                                                                                                                                                                                      |
| 49134 | 2.60 | 0.09 | 0.0026 | 0.0176 | 1.31 | all_v2.0.3574.C<br>1               | unclassified<br>LOC794166 protein; n=2; Danio<br>rerio Rep: LOC794166 protein - Danio<br>rerio (Zebrafish) (Brachydanio rerio)<br>D-amino-acid oxidase 1; n=5; Danio<br>rerio Rep: D-amino-acid oxidase 1 - Danio<br>rerio (Zebrafish) (Brachydanio rerio)<br>Zymogen granule membrane protein 16<br>precursor (Zymogen granule protein 16)<br>(Secretory lectin ZG16).; n=1; Takifugu<br>rubripes Rep: Zymogen granule membrane<br>protein 16 precursor (Zymogen granule<br>protein 16) (Secretory lectin ZG16) -<br>Takifugu rubripes |
| 38854 | 2.75 | 0.09 | 0.0017 | 0.0136 | 1.31 | all_v2.0.4197.C<br>1               |                                                                                                                                                                                                                                                                                                                                                                                                                                                                                                                                         |
| 36799 | 2.73 | 0.09 | 0.0018 | 0.0141 | 1.31 | all_v2.0.4522.C<br>1               |                                                                                                                                                                                                                                                                                                                                                                                                                                                                                                                                         |
| 44187 | 2.80 | 0.08 | 0.0015 | 0.0123 | 1.31 | all_v2.0.10214.<br>C1              |                                                                                                                                                                                                                                                                                                                                                                                                                                                                                                                                         |
| 49035 | 2.88 | 0.08 | 0.0012 | 0.0108 | 1.31 | sb_gmnbgi_000<br>3o02.pDNRF2       | Unassigned protein                                                                                                                                                                                                                                                                                                                                                                                                                                                                                                                      |
| 47677 | 2.78 | 0.08 | 0.0016 | 0.0128 | 1.31 | sb_gmnbhkc_0<br>004122.pDNRF<br>2  | Unassigned protein<br>disulfide isomerase; n=1; Takifugu<br>rubripes Rep: disulfide isomerase -<br>Takifugu rubripes                                                                                                                                                                                                                                                                                                                                                                                                                    |
| 36874 | 2.67 | 0.09 | 0.0022 | 0.0157 | 1.31 | all_v2.0.11034.<br>C1              | Novel immune-type receptor 4; n=2;<br>Oncorhynchus mykiss Rep: Novel<br>immune-type receptor 4 - Oncorhynchus<br>mykiss (Rainbow trout) (Salmo gairdneri)                                                                                                                                                                                                                                                                                                                                                                               |
| 39371 | 2.53 | 0.10 | 0.0032 | 0.0202 | 1.31 | sb_gmnbhkas_0<br>007i12.pDNRF<br>2 |                                                                                                                                                                                                                                                                                                                                                                                                                                                                                                                                         |
| 52660 | 2.57 | 0.09 | 0.0028 | 0.0187 | 1.31 | all_v2.0.14023.<br>C1              | unclassified                                                                                                                                                                                                                                                                                                                                                                                                                                                                                                                            |
| 51854 | 3.28 | 0.06 | 0.0005 | 0.0054 | 1.30 | all_v2.0.15245.<br>C1              | unclassified                                                                                                                                                                                                                                                                                                                                                                                                                                                                                                                            |
| 39338 | 2.38 | 0.10 | 0.0046 | 0.0263 | 1.30 | sb_gmnbhkc_0<br>008m05.pDNR<br>F2  | NILT2 leucocyte receptor; n=2; Cyprinus<br>carpio Rep: NILT2 leucocyte receptor -<br>Cyprinus carpio (Common carp)                                                                                                                                                                                                                                                                                                                                                                                                                      |

|       |      |      |        |        |      |                                      |                                                                                                                                                                                                                                                                                                                                                                                                                                                                                                                                                                                                                                                     |
|-------|------|------|--------|--------|------|--------------------------------------|-----------------------------------------------------------------------------------------------------------------------------------------------------------------------------------------------------------------------------------------------------------------------------------------------------------------------------------------------------------------------------------------------------------------------------------------------------------------------------------------------------------------------------------------------------------------------------------------------------------------------------------------------------|
| 45283 | 2.56 | 0.09 | 0.0029 | 0.0189 | 1.30 | all_v2.0.6467.C<br>1                 | LOC712175; similar to Zinc finger protein 74 (hZNF7)                                                                                                                                                                                                                                                                                                                                                                                                                                                                                                                                                                                                |
| 45221 | 3.22 | 0.06 | 0.0005 | 0.0060 | 1.30 | sb_gmnbspic_0<br>014i03.pDNRm<br>13r | LOC588946; similar to EF-hand calcium binding domain 5                                                                                                                                                                                                                                                                                                                                                                                                                                                                                                                                                                                              |
| 45657 | 2.61 | 0.09 | 0.0025 | 0.0174 | 1.30 | all_v2.0.1588.C<br>2                 | non-directed                                                                                                                                                                                                                                                                                                                                                                                                                                                                                                                                                                                                                                        |
| 51403 | 2.90 | 0.07 | 0.0012 | 0.0103 | 1.30 | all_v2.0.6524.C<br>1                 | unclassified                                                                                                                                                                                                                                                                                                                                                                                                                                                                                                                                                                                                                                        |
| 44510 | 2.55 | 0.09 | 0.0030 | 0.0193 | 1.30 | PKRvB6<br>all_v2.0.8328.C<br>1       | custom - double-stranded RNA-dependent protein kinase B                                                                                                                                                                                                                                                                                                                                                                                                                                                                                                                                                                                             |
| 54747 | 3.04 | 0.07 | 0.0008 | 0.0081 | 1.29 | all_v2.0.15096.<br>C1                | unclassified<br>Zgc:92790; n=4; Eumetazoa Rep:<br>Zgc:92790 - Danio rerio (Zebrafish)<br>(Brachydanio rerio)                                                                                                                                                                                                                                                                                                                                                                                                                                                                                                                                        |
| 44100 | 3.01 | 0.07 | 0.0009 | 0.0085 | 1.29 | STAT11<br>all_v2.0.7789.C<br>2       | custom - Signal transducer and activator of transcription 1                                                                                                                                                                                                                                                                                                                                                                                                                                                                                                                                                                                         |
| 44595 | 3.39 | 0.05 | 0.0004 | 0.0045 | 1.29 | all_v2.0.2894.C<br>5                 | unclassified<br>LOC451002; similar to very large inducible GTPase-1                                                                                                                                                                                                                                                                                                                                                                                                                                                                                                                                                                                 |
| 49070 | 3.22 | 0.06 | 0.0005 | 0.0059 | 1.29 | sb_gmapov_001<br>2m19.pDNRm1<br>3r   | Tubulin alpha chain; n=36; Fungi/Metazoa group Rep: Tubulin alpha chain - Octopus dofleini (Giant octopus)                                                                                                                                                                                                                                                                                                                                                                                                                                                                                                                                          |
| 42817 | 2.45 | 0.09 | 0.0039 | 0.0231 | 1.29 | all_v2.0.2935.C<br>2                 | unclassified                                                                                                                                                                                                                                                                                                                                                                                                                                                                                                                                                                                                                                        |
| 51351 | 2.73 | 0.07 | 0.0018 | 0.0142 | 1.29 | all_v2.0.5496.C<br>1                 | unclassified                                                                                                                                                                                                                                                                                                                                                                                                                                                                                                                                                                                                                                        |
| 52032 | 2.59 | 0.08 | 0.0026 | 0.0179 | 1.29 | sb_gmnbhkas_0<br>004b06.pDNR<br>m13r | PREDICTED: similar to CARS-Cyp; n=2; Gallus gallus Rep: PREDICTED: similar to CARS-Cyp - Gallus gallus                                                                                                                                                                                                                                                                                                                                                                                                                                                                                                                                              |
| 40291 | 2.57 | 0.09 | 0.0028 | 0.0186 | 1.29 | all_v2.0.9920.C<br>1                 | unclassified                                                                                                                                                                                                                                                                                                                                                                                                                                                                                                                                                                                                                                        |
| 54674 | 2.61 | 0.08 | 0.0025 | 0.0173 | 1.29 | all_v2.0.2008.C<br>1                 | Zgc:92027; n=2; Danio rerio Rep:<br>Zgc:92027 - Danio rerio (Zebrafish)<br>(Brachydanio rerio)                                                                                                                                                                                                                                                                                                                                                                                                                                                                                                                                                      |
| 44043 | 2.57 | 0.08 | 0.0028 | 0.0186 | 1.28 | all_v2.0.1957.C<br>1                 | PREDICTED: similar to intercellular adhesion molecule 5, telencephalin; n=1; Monodelphis domestica Rep:<br>PREDICTED: similar to intercellular adhesion molecule 5, telencephalin - Monodelphis domestica                                                                                                                                                                                                                                                                                                                                                                                                                                           |
| 40571 | 3.18 | 0.06 | 0.0006 | 0.0063 | 1.28 | sb_gmnbhkc_0<br>013n08.pDNRf<br>2    | Unassigned protein                                                                                                                                                                                                                                                                                                                                                                                                                                                                                                                                                                                                                                  |
| 46972 | 2.91 | 0.07 | 0.0011 | 0.0102 | 1.28 | all_v2.0.13397.<br>C1.a              | non-directed                                                                                                                                                                                                                                                                                                                                                                                                                                                                                                                                                                                                                                        |
| 45642 | 2.39 | 0.09 | 0.0045 | 0.0258 | 1.28 | sb_gmnlkfta_00<br>07118.t7           | MHC class Ia antigen; n=2; Gadus morhua Rep: MHC class Ia antigen - Gadus morhua (Atlantic cod)                                                                                                                                                                                                                                                                                                                                                                                                                                                                                                                                                     |
| 39063 | 2.75 | 0.07 | 0.0017 | 0.0136 | 1.28 | sb_gmnlkric_00<br>02a08.t7           | LOC477822; similar to hyaluronan binding protein 2 [EC:3.4.21.-]; K08648<br>hyaluronan binding protein 2<br>CASP8 and FADD-like apoptosis regulator precursor (Cellular FLICE-like inhibitory protein) (c-FLIP) (Caspase-eight-related protein) (Casper) (Caspase-like apoptosis regulatory protein) (CLARP) (MACH-related inducer of toxicity) (MRIT) (Caspase homolog) (C; n=1; Takifugu rubripes Rep: CASP8 and FADD-like apoptosis regulator precursor (Cellular FLICE-like inhibitory protein) (c-FLIP) (Caspase-eight-related protein) (Casper) (Caspase-like apoptosis regulatory protein) (CLARP) (MACH-related inducer of toxicity) (MRIT) |
| 45088 | 2.61 | 0.08 | 0.0025 | 0.0173 | 1.28 | all_v2.0.14245.<br>C1                | (Caspase homolog) (C - Takifugu rubripes                                                                                                                                                                                                                                                                                                                                                                                                                                                                                                                                                                                                            |
| 36329 | 2.74 | 0.07 | 0.0018 | 0.0139 | 1.28 | all_v2.0.3465.C                      | Zgc:158614; n=2; Danio rerio Rep:                                                                                                                                                                                                                                                                                                                                                                                                                                                                                                                                                                                                                   |
| 43762 | 3.24 | 0.05 | 0.0005 | 0.0057 | 1.28 |                                      |                                                                                                                                                                                                                                                                                                                                                                                                                                                                                                                                                                                                                                                     |

|       |      |      |        |        |      |                            |                                                                                                                                                                                                                                                                                                                                                                                                                                                                                                                                  |
|-------|------|------|--------|--------|------|----------------------------|----------------------------------------------------------------------------------------------------------------------------------------------------------------------------------------------------------------------------------------------------------------------------------------------------------------------------------------------------------------------------------------------------------------------------------------------------------------------------------------------------------------------------------|
|       |      |      |        |        |      | 1                          | Zgc:158614 - Danio rerio (Zebrafish) (Brachydanio rerio)                                                                                                                                                                                                                                                                                                                                                                                                                                                                         |
|       |      |      |        |        |      |                            | Similar to Tetraodon protein product CAG00085; n=1; Oncorhynchus                                                                                                                                                                                                                                                                                                                                                                                                                                                                 |
| 42213 | 2.57 | 0.08 | 0.0028 | 0.0188 | 1.27 | sb_gmnbhkc_010g06.pDNRF2   | mykiss Rep: Similar to Tetraodon protein product CAG00085 - Oncorhynchus mykiss (Rainbow trout) (Salmo gairdneri)                                                                                                                                                                                                                                                                                                                                                                                                                |
| 38404 | 3.02 | 0.06 | 0.0009 | 0.0084 | 1.27 | all_v2.0.1538.C1           | Homolog of Homo sapiens TiTin isoform novex-2; n=1; Takifugu rubripes Rep: Homolog of Homo sapiens TiTin isoform novex-2 - Takifugu rubripes                                                                                                                                                                                                                                                                                                                                                                                     |
|       |      |      |        |        |      |                            | Gamma-glutamyltransferase 5 precursor (EC 2.3.2.2) (Gamma-glutamyltranspeptidase 5) (Gamma-glutamyltransferase-like activity 1) (GGT-rel) [Contains: Gamma-glutamyltransferase 5 heavy chain; Gamma-glutamyltransferase 5 light chain].; n=1; Takifugu rubripes Rep: Gamma-glutamyltransferase 5 precursor (EC 2.3.2.2) (Gamma-glutamyltranspeptidase 5) (Gamma-glutamyltransferase-like activity 1) (GGT-rel) [Contains: Gamma-glutamyltransferase 5 heavy chain; Gamma-glutamyltransferase 5 light chain]. - Takifugu rubripes |
| 37328 | 2.47 | 0.08 | 0.0036 | 0.0221 | 1.27 | all_v2.0.12699.C1          | Ras-related protein Rab-8B; n=17; Euteleostomi Rep: Ras-related protein Rab-8B - Homo sapiens (Human)                                                                                                                                                                                                                                                                                                                                                                                                                            |
| 41711 | 2.68 | 0.07 | 0.0021 | 0.0156 | 1.27 | all_v2.0.13005.C1          |                                                                                                                                                                                                                                                                                                                                                                                                                                                                                                                                  |
| 48324 | 2.48 | 0.08 | 0.0036 | 0.0220 | 1.27 | sb_gmnl1a_0007f24.t7       | Unassigned protein                                                                                                                                                                                                                                                                                                                                                                                                                                                                                                               |
| 47948 | 2.88 | 0.06 | 0.0012 | 0.0106 | 1.26 | all_v2.0.17446.C1          | Unassigned protein                                                                                                                                                                                                                                                                                                                                                                                                                                                                                                               |
| 41718 | 2.49 | 0.08 | 0.0035 | 0.0215 | 1.26 | all_v2.0.12871.C1          | RBM39 protein; n=4; Eutheria Rep: RBM39 protein - Homo sapiens (Human)                                                                                                                                                                                                                                                                                                                                                                                                                                                           |
| 35876 | 2.66 | 0.07 | 0.0022 | 0.0161 | 1.26 | sb_gmapov_001n05.pDNRF2    | Alpha-2-macroglobulin receptor-associated protein precursor; n=6; Catarrhini Rep: Alpha-2-macroglobulin receptor-associated protein precursor - Homo sapiens (Human)                                                                                                                                                                                                                                                                                                                                                             |
| 46381 | 3.26 | 0.05 | 0.0005 | 0.0056 | 1.26 | all_v2.0.15502.C1          | tRNA 2'-phosphotransferase 1 (EC 2.7.1.160).; n=1; Takifugu rubripes                                                                                                                                                                                                                                                                                                                                                                                                                                                             |
| 52993 | 2.50 | 0.07 | 0.0034 | 0.0213 | 1.26 | all_v2.0.6512.C3           | unclassified                                                                                                                                                                                                                                                                                                                                                                                                                                                                                                                     |
| 53182 | 2.72 | 0.06 | 0.0019 | 0.0145 | 1.25 | all_v2.0.55.C3             | unclassified                                                                                                                                                                                                                                                                                                                                                                                                                                                                                                                     |
| 53591 | 2.46 | 0.08 | 0.0037 | 0.0225 | 1.25 | all_v2.0.8746.C1           | unclassified                                                                                                                                                                                                                                                                                                                                                                                                                                                                                                                     |
|       |      |      |        |        |      |                            | Thyroid receptor-interacting protein 13 (TRIP-13) (Thyroid hormone receptor interactor 13) (Human papillomavirus type 16 E1 protein-binding protein) (HPV16 E1 protein-binding protein) (16E1-BP).; n=1; Takifugu rubripes Rep: Thyroid receptor-interacting protein 13 (TRIP-13) (Thyroid hormone receptor interactor 13) (Human papillomavirus type 16 E1 protein-binding protein) (HPV16 E1 protein-binding protein) (16E1-BP). - Takifugu rubripes                                                                           |
| 42568 | 2.82 | 0.06 | 0.0014 | 0.0119 | 1.25 | all_v2.0.9385.C2           |                                                                                                                                                                                                                                                                                                                                                                                                                                                                                                                                  |
| 49122 | 2.44 | 0.07 | 0.0040 | 0.0237 | 1.25 | all_v2.0.13533.C1          | unclassified                                                                                                                                                                                                                                                                                                                                                                                                                                                                                                                     |
|       |      |      |        |        |      |                            | LOC553437 protein; n=2; Danio rerio Rep: LOC553437 protein - Brachydanio rerio (Zebrafish) (Danio rerio)                                                                                                                                                                                                                                                                                                                                                                                                                         |
| 38828 | 2.58 | 0.06 | 0.0027 | 0.0181 | 1.25 | sb_gmnbmu_008m08.pDNRFm13r | Putative ATP-dependent RNA helicase DHX33 (EC 3.6.1.-) (DEAH box protein 33).; n=1; Takifugu rubripes Rep: Putative ATP-dependent RNA helicase DHX33                                                                                                                                                                                                                                                                                                                                                                             |
| 41613 | 2.48 | 0.07 | 0.0036 | 0.0220 | 1.24 | sb_gmnbpic_003h16.pDNRF2   |                                                                                                                                                                                                                                                                                                                                                                                                                                                                                                                                  |

|       |       |      |        |        |      |                                 |                                                                                                                                                                                                                                                                                                                                                                                  |
|-------|-------|------|--------|--------|------|---------------------------------|----------------------------------------------------------------------------------------------------------------------------------------------------------------------------------------------------------------------------------------------------------------------------------------------------------------------------------------------------------------------------------|
|       |       |      |        |        |      |                                 | (EC 3.6.1.-) (DEAH box protein 33). - Takifugu rubripes                                                                                                                                                                                                                                                                                                                          |
|       |       |      |        |        |      |                                 | Wu:fc55e05-prov protein; n=2; Euteleostomi Rep: Wu:fc55e05-prov protein - Xenopus laevis (African clawed frog)                                                                                                                                                                                                                                                                   |
| 43254 | 2.51  | 0.07 | 0.0033 | 0.0208 | 1.24 | sb_gmapov_001<br>9a10.pDNRm13r  |                                                                                                                                                                                                                                                                                                                                                                                  |
| 46261 | 2.46  | 0.07 | 0.0037 | 0.0225 | 1.24 | all_v2.0.10360.C1               | si:rp71-45k5.3; si:rp71-45k5.3                                                                                                                                                                                                                                                                                                                                                   |
| 49653 | 2.86  | 0.05 | 0.0013 | 0.0112 | 1.24 | all_v2.0.11316.C1               | unclassified                                                                                                                                                                                                                                                                                                                                                                     |
| 45302 | 3.05  | 0.04 | 0.0008 | 0.0078 | 1.24 | sb_gmapov_002<br>8e22.pDNRf2    | LOC733975; novel protein similar to B9 protein domain family                                                                                                                                                                                                                                                                                                                     |
| 36028 | 2.46  | 0.07 | 0.0037 | 0.0225 | 1.24 | all_v2.0.3.C4                   | ATP synthase subunit beta, mitochondrial precursor; n=27; Euteleostomi Rep: ATP synthase subunit beta, mitochondrial precursor - Homo sapiens (Human)                                                                                                                                                                                                                            |
| 41303 | 2.40  | 0.07 | 0.0044 | 0.0255 | 1.23 | sb_gmnlkic_00<br>05k05.pDNRm13r | Presequence protease, mitochondrial precursor; n=7; Danio rerio Rep: Presequence protease, mitochondrial precursor - Brachydanio rerio (Zebrafish) (Danio rerio)                                                                                                                                                                                                                 |
| 54245 | 2.87  | 0.05 | 0.0013 | 0.0110 | 1.23 | all_v2.0.435.C1                 | unclassified                                                                                                                                                                                                                                                                                                                                                                     |
| 50861 | 2.81  | 0.05 | 0.0015 | 0.0122 | 1.22 | all_v2.0.13653.C1               | unclassified                                                                                                                                                                                                                                                                                                                                                                     |
| 51142 | 2.55  | 0.06 | 0.0030 | 0.0194 | 1.22 | all_v2.0.7409.C1                | unclassified                                                                                                                                                                                                                                                                                                                                                                     |
| 50989 | 2.93  | 0.04 | 0.0011 | 0.0099 | 1.22 | all_v2.0.2653.C1                | unclassified                                                                                                                                                                                                                                                                                                                                                                     |
| 54167 | 2.69  | 0.05 | 0.0021 | 0.0153 | 1.22 | all_v2.0.3108.C1                | unclassified                                                                                                                                                                                                                                                                                                                                                                     |
| 49688 | 3.04  | 0.04 | 0.0008 | 0.0081 | 1.22 | all_v2.0.2053.C1                | unclassified                                                                                                                                                                                                                                                                                                                                                                     |
| 51151 | 2.60  | 0.05 | 0.0026 | 0.0176 | 1.22 | all_v2.0.11681.C1               | unclassified                                                                                                                                                                                                                                                                                                                                                                     |
| 43280 | 2.43  | 0.05 | 0.0040 | 0.0239 | 1.19 | all_v2.0.3981.C1                | ZFP313 protein; n=1; Oncorhynchus mykiss Rep: ZFP313 protein - Oncorhynchus mykiss (Rainbow trout) (Salmo gairdneri)                                                                                                                                                                                                                                                             |
| 40277 | 2.75  | 0.03 | 0.0017 | 0.0135 | 1.19 | sb_gmnbmu_00<br>14b23.pDNRm13r  | PREDICTED: similar to Calcineurin B subunit isoform 1 (Protein phosphatase 2B regulatory subunit 1) (Protein phosphatase 3 regulatory subunit B alpha isoform 1); n=1; Canis familiaris Rep: PREDICTED: similar to Calcineurin B subunit isoform 1 (Protein phosphatase 2B regulatory subunit 1) (Protein phosphatase 3 regulatory subunit B alpha isoform 1) - Canis familiaris |
| 43142 | 2.38  | 0.05 | 0.0047 | 0.0265 | 1.19 | all_v2.0.13901.C1               | Vacuolar ATP synthase subunit C 1 (EC 3.6.3.14) (V-ATPase subunit C 1) (Vacuolar proton pump subunit C 1); n=1; Takifugu rubripes Rep: Vacuolar ATP synthase subunit C 1 (EC 3.6.3.14) (V-ATPase subunit C 1) (Vacuolar proton pump subunit C 1). - Takifugu rubripes                                                                                                            |
| 39883 | -3.56 | 0.03 | 0.0003 | 0.0036 | 0.81 | sb_gmapov_001<br>8c14.pDNRf2    | Peptidase S8 and S53, subtilisin, kexin, sedolisin; n=1; Herpetosiphon aurantiacus ATCC 23779 Rep: Peptidase S8 and S53, subtilisin, kexin, sedolisin - Herpetosiphon aurantiacus ATCC 23779                                                                                                                                                                                     |
| 35591 | -3.07 | 0.05 | 0.0008 | 0.0076 | 0.80 | all_v2.0.6634.C1                | 39S ribosomal protein L2, mitochondrial precursor (L2mt) (MRP-L2); n=1; Takifugu rubripes Rep: 39S ribosomal protein L2, mitochondrial precursor (L2mt) (MRP-L2). - Takifugu rubripes                                                                                                                                                                                            |
| 44414 | -3.03 | 0.05 | 0.0008 | 0.0082 | 0.79 | all_v2.0.10891.C1               | Competence multi-domain protein                                                                                                                                                                                                                                                                                                                                                  |
| 40272 | -3.10 | 0.05 | 0.0007 | 0.0073 | 0.79 | all_v2.0.1446.C1                | PREDICTED: similar to C10ORF6; n=2; Gallus gallus Rep: PREDICTED: similar to C10ORF6 - Gallus gallus                                                                                                                                                                                                                                                                             |

|       |       |      |        |        |      |                                    |                                                                                                                                                                                                                                                                          |
|-------|-------|------|--------|--------|------|------------------------------------|--------------------------------------------------------------------------------------------------------------------------------------------------------------------------------------------------------------------------------------------------------------------------|
| 48062 | -3.39 | 0.04 | 0.0004 | 0.0045 | 0.79 | sb_gmnlem_00<br>24j04.t7           | Unassigned protein                                                                                                                                                                                                                                                       |
| 51711 | -3.16 | 0.05 | 0.0006 | 0.0066 | 0.79 | all_v2.0.8976.C<br>1               | unclassified<br>Novel KRAB box and zinc finger, C2H2<br>type domain containing protein; n=4; Mus<br>musculus Rep: Novel KRAB box and zinc<br>finger, C2H2 type domain containing<br>protein - Mus musculus (Mouse)                                                       |
| 39377 | -3.38 | 0.05 | 0.0004 | 0.0046 | 0.78 | sb_gmnblits_00<br>26k02.pDNRF2     | PREDICTED: similar to APC; n=1;<br>Ornithorhynchus anatinus Rep:<br>PREDICTED: similar to APC -<br>Ornithorhynchus anatinus                                                                                                                                              |
| 40225 | -3.06 | 0.06 | 0.0008 | 0.0077 | 0.78 | sb_gmnlsras_00<br>04g22.t7         | unclassified                                                                                                                                                                                                                                                             |
| 51411 | -3.02 | 0.06 | 0.0008 | 0.0083 | 0.78 | all_v2.0.1601.C<br>1               | Unassigned protein                                                                                                                                                                                                                                                       |
| 46908 | -3.15 | 0.05 | 0.0006 | 0.0066 | 0.78 | all_v2.0.8789.C<br>1               | Unassigned protein                                                                                                                                                                                                                                                       |
| 48747 | -3.12 | 0.06 | 0.0007 | 0.0070 | 0.77 | sb_gmnlla_003<br>8118.t7           | Unassigned protein<br>Gabpa protein; n=3; Danio rerio Rep:<br>Gabpa protein - Danio rerio (Zebrafish)                                                                                                                                                                    |
| 37298 | -3.40 | 0.06 | 0.0004 | 0.0044 | 0.76 | sb_gmnlfic_00<br>07113.t7          | (Brachydanio rerio)                                                                                                                                                                                                                                                      |
| 49253 | -3.83 | 0.05 | 0.0002 | 0.0027 | 0.75 | all_v2.0.1504.C<br>1               | unclassified                                                                                                                                                                                                                                                             |
| 47132 | -3.09 | 0.08 | 0.0007 | 0.0075 | 0.75 | all_v2.0.4.C255                    | Unassigned protein                                                                                                                                                                                                                                                       |
| 48597 | -3.18 | 0.07 | 0.0006 | 0.0063 | 0.75 | sb_gmnbmu_00<br>02n03.pDNRF2       | Unassigned protein                                                                                                                                                                                                                                                       |
| 45671 | -3.20 | 0.07 | 0.0006 | 0.0061 | 0.75 | all_v2.0.18547.<br>C1              | non-directed<br>PREDICTED: similar to Activated in<br>Blocked Unfolded protein response family<br>member (abu-2); n=1; Rattus<br>norvegicus Rep: PREDICTED: similar to<br>Activated in Blocked Unfolded protein<br>response family member (abu-2) - Rattus<br>norvegicus |
| 40188 | -3.07 | 0.08 | 0.0008 | 0.0076 | 0.74 | sb_gmnlsras_00<br>01c11.t7         | Protein phosphatase 5; n=2; Drosophila<br>melanogaster Rep: Protein phosphatase 5 -<br>Drosophila melanogaster (Fruit fly)                                                                                                                                               |
| 41523 | -3.17 | 0.08 | 0.0006 | 0.0065 | 0.74 | sb_gmnlskic_00<br>09p24.pDNRF2     | PREDICTED: similar to KIAA0569<br>protein; n=3; Danio rerio Rep:<br>PREDICTED: similar to KIAA0569<br>protein - Danio rerio                                                                                                                                              |
| 40591 | -3.42 | 0.07 | 0.0003 | 0.0043 | 0.74 | all_v2.0.4944.C<br>1               | Vitellogenin B; n=1; Melanogrammus<br>aeglefinus Rep: Vitellogenin B -<br>Melanogrammus aeglefinus (Haddock)                                                                                                                                                             |
| 43212 | -3.33 | 0.07 | 0.0004 | 0.0049 | 0.74 | sb_gmapte_000<br>6b24.pDNRM1<br>3r | Unassigned protein                                                                                                                                                                                                                                                       |
| 47796 | -3.20 | 0.08 | 0.0006 | 0.0061 | 0.74 | all_v2.0.16090.<br>C1              | Unassigned protein                                                                                                                                                                                                                                                       |
| 52325 | -3.82 | 0.06 | 0.0002 | 0.0027 | 0.73 | all_v2.0.11802.<br>C1              | unclassified<br>Suppressor of defective silencing 3<br>homolog; n=7; Clupeocephala Rep:<br>Suppressor of defective silencing 3<br>homolog - Danio rerio (Zebrafish)                                                                                                      |
| 42420 | -3.08 | 0.09 | 0.0007 | 0.0075 | 0.73 | sb_gmnlfic_00<br>06b05.t7          | (Brachydanio rerio)                                                                                                                                                                                                                                                      |
| 47500 | -3.79 | 0.06 | 0.0002 | 0.0028 | 0.73 | sb_gmnlla_003<br>5n08.t7           | Unassigned protein<br>Apolipoprotein C-II; n=1; Takifugu<br>rubripes Rep: Apolipoprotein C-II - Fugu<br>rubripes (Japanese pufferfish) (Takifugu<br>rubripes)                                                                                                            |
| 35961 | -3.09 | 0.09 | 0.0007 | 0.0075 | 0.73 | all_v2.0.1089.C<br>1               | ATP synthase, H <sup>+</sup> transporting,<br>mitochondrial F0 complex, subunit c; n=3;<br>Cyprinidae Rep: ATP synthase, H <sup>+</sup><br>transporting, mitochondrial F0 complex,<br>subunit c - Danio rerio (Zebrafish)                                                |
| 36033 | -3.74 | 0.06 | 0.0002 | 0.0029 | 0.73 | all_v2.0.4258.C<br>2               | (Brachydanio rerio)                                                                                                                                                                                                                                                      |
| 49327 | -3.22 | 0.09 | 0.0005 | 0.0060 | 0.73 | all_v2.0.7420.C<br>1               | unclassified                                                                                                                                                                                                                                                             |



|       |       |      |        |        |      |                            |                                                                                                                                                                                                                                                                                         |
|-------|-------|------|--------|--------|------|----------------------------|-----------------------------------------------------------------------------------------------------------------------------------------------------------------------------------------------------------------------------------------------------------------------------------------|
| 46436 | -3.75 | 0.07 | 0.0002 | 0.0029 | 0.72 | all_v2.0.15699.C1          | Unassigned protein                                                                                                                                                                                                                                                                      |
| 51280 | -4.21 | 0.05 | 0.0001 | 0.0019 | 0.72 | all_v2.0.8472.C2           | unclassified                                                                                                                                                                                                                                                                            |
| 52978 | -3.20 | 0.09 | 0.0006 | 0.0061 | 0.72 | all_v2.0.7485.C1           | unclassified                                                                                                                                                                                                                                                                            |
| 52072 | -3.47 | 0.08 | 0.0003 | 0.0041 | 0.72 | all_v2.0.10070.C1          | unclassified                                                                                                                                                                                                                                                                            |
| 42088 | -3.60 | 0.08 | 0.0002 | 0.0034 | 0.72 | all_v2.0.17743.C1          | Serine/threonine-protein kinase Nek2; n=13; Eutheria Rep: Serine/threonine-protein kinase Nek2 - Homo sapiens (Human)                                                                                                                                                                   |
| 53356 | -3.43 | 0.08 | 0.0003 | 0.0043 | 0.72 | all_v2.0.2372.C2           | unclassified                                                                                                                                                                                                                                                                            |
| 40941 | -3.35 | 0.08 | 0.0004 | 0.0048 | 0.72 | all_v2.0.3046.C2           | PREDICTED: similar to ribosomal protein L15; n=1; Macaca mulatta Rep: PREDICTED: similar to ribosomal protein L15 - Macaca mulatta                                                                                                                                                      |
| 52454 | -3.00 | 0.11 | 0.0009 | 0.0086 | 0.71 | all_v2.0.10880.C1          | unclassified                                                                                                                                                                                                                                                                            |
| 46084 | -3.02 | 0.11 | 0.0009 | 0.0084 | 0.71 | sb_gmnlfas_0004c10.t7      | prothymosin alpha like-1 protein [Danio rerio]                                                                                                                                                                                                                                          |
| 53882 | -3.63 | 0.09 | 0.0002 | 0.0033 | 0.70 | all_v2.0.5809.C1           | unclassified                                                                                                                                                                                                                                                                            |
| 54547 | -3.13 | 0.11 | 0.0007 | 0.0069 | 0.70 | all_v2.0.16354.C1          | unclassified                                                                                                                                                                                                                                                                            |
| 44670 | -3.65 | 0.09 | 0.0002 | 0.0032 | 0.69 | sb_gmnbhkc_0005f19.pDNRF2  | DUF1055 domain containing protein LOC553307 protein; n=4; Danio rerio Rep: LOC553307 protein - Brachydanio rerio (Zebrafish) (Danio rerio)                                                                                                                                              |
| 38822 | -3.21 | 0.11 | 0.0005 | 0.0060 | 0.69 | sb_gmnbmd_0007e01.pDNRM13r |                                                                                                                                                                                                                                                                                         |
| 48418 | -3.22 | 0.11 | 0.0005 | 0.0059 | 0.69 | sb_gmnl1a_0047b11.t7       | Unassigned protein                                                                                                                                                                                                                                                                      |
| 41210 | -3.90 | 0.08 | 0.0001 | 0.0025 | 0.69 | all_v2.0.5638.C1           | PREDICTED: similar to VPS13C-2A protein isoform 1; n=3; Bos taurus Rep: PREDICTED: similar to VPS13C-2A protein isoform 1 - Bos taurus                                                                                                                                                  |
| 42046 | -3.13 | 0.11 | 0.0007 | 0.0069 | 0.69 | all_v2.0.18763.C1          | Selenoprotein P precursor (SeP); n=1; Takifugu rubripes Rep: Selenoprotein P precursor (SeP). - Takifugu rubripes                                                                                                                                                                       |
| 44930 | -3.43 | 0.10 | 0.0003 | 0.0043 | 0.69 | all_v2.0.16304.C1          | I-set domain containing protein CC chemokine; n=1; Pseudosciaena crocea (Croceine croaker) Rep: CC chemokine - Pseudosciaena crocea (Croceine croaker)                                                                                                                                  |
| 36386 | -3.43 | 0.10 | 0.0003 | 0.0043 | 0.69 | all_v2.0.7753.C2           |                                                                                                                                                                                                                                                                                         |
| 52976 | -3.06 | 0.12 | 0.0008 | 0.0077 | 0.68 | all_v2.0.1798.C1           | unclassified                                                                                                                                                                                                                                                                            |
| 41743 | -3.00 | 0.13 | 0.0009 | 0.0086 | 0.68 | all_v2.0.848.C2            | Reticulon 4 receptor; n=5; Danio rerio Rep: Reticulon 4 receptor - Danio rerio (Zebrafish) (Brachydanio rerio)                                                                                                                                                                          |
| 36776 | -4.07 | 0.08 | 0.0001 | 0.0021 | 0.68 | sb_gmnbpcic_0001o08.pDNRF2 | Cytochrome P450 7A1 (Cholesterol 7-alpha-monooxygenase) (CYPVII) (EC 1.14.13.17) (Cholesterol 7-alpha-hydroxylase); n=1; Takifugu rubripes Rep: Cytochrome P450 7A1 (Cholesterol 7-alpha-monooxygenase) (CYPVII) (EC 1.14.13.17) (Cholesterol 7-alpha-hydroxylase). - Takifugu rubripes |
| 52493 | -4.17 | 0.08 | 0.0001 | 0.0020 | 0.68 | all_v2.0.1280.C2           | unclassified                                                                                                                                                                                                                                                                            |
| 47663 | -3.92 | 0.09 | 0.0001 | 0.0024 | 0.68 | sb_gmlbgits_0003f15.sp6    | Unassigned protein                                                                                                                                                                                                                                                                      |
| 45113 | -3.64 | 0.10 | 0.0002 | 0.0033 | 0.68 | sb_gmapov_0018o17.pDNRF2   | LOC488397; similar to Methyltransferase-like protein 2                                                                                                                                                                                                                                  |
| 44982 | -3.28 | 0.12 | 0.0005 | 0.0054 | 0.67 | all_v2.0.4062.C1           | LOC100001974; similar to DAZ associated protein 2                                                                                                                                                                                                                                       |
| 40970 | -4.15 | 0.08 | 0.0001 | 0.0020 | 0.67 | sb_gmapht_001              | PREDICTED: similar to RNA-binding                                                                                                                                                                                                                                                       |

|       |       |      |        |        |      |                                    |                                                                                                                                                                                                                                                                                                                                                                                                                                                                                                                                |
|-------|-------|------|--------|--------|------|------------------------------------|--------------------------------------------------------------------------------------------------------------------------------------------------------------------------------------------------------------------------------------------------------------------------------------------------------------------------------------------------------------------------------------------------------------------------------------------------------------------------------------------------------------------------------|
|       |       |      |        |        |      | 6c24.pDNRF2                        | protein EWS; n=1; Mus musculus Rep: PREDICTED: similar to RNA-binding protein EWS - Mus musculus                                                                                                                                                                                                                                                                                                                                                                                                                               |
| 50372 | -3.13 | 0.13 | 0.0007 | 0.0069 | 0.67 | all_v2.0.3379.C<br>2               | unclassified                                                                                                                                                                                                                                                                                                                                                                                                                                                                                                                   |
| 53024 | -3.56 | 0.11 | 0.0003 | 0.0036 | 0.67 | all_v2.0.5664.C<br>1               | unclassified                                                                                                                                                                                                                                                                                                                                                                                                                                                                                                                   |
| 48311 | -3.22 | 0.13 | 0.0005 | 0.0060 | 0.67 | sb_gmnl1a_001<br>3d16.t7           | Unassigned protein                                                                                                                                                                                                                                                                                                                                                                                                                                                                                                             |
| 55159 | -3.90 | 0.10 | 0.0001 | 0.0025 | 0.66 | all_v2.0.1965.C<br>1               | unclassified                                                                                                                                                                                                                                                                                                                                                                                                                                                                                                                   |
| 53027 | -3.62 | 0.11 | 0.0002 | 0.0033 | 0.66 | all_v2.0.1406.C<br>1               | unclassified                                                                                                                                                                                                                                                                                                                                                                                                                                                                                                                   |
| 45907 | -3.67 | 0.10 | 0.0002 | 0.0031 | 0.66 | all_v2.0.5279.C<br>2.a             | non-directed                                                                                                                                                                                                                                                                                                                                                                                                                                                                                                                   |
| 51606 | -3.26 | 0.13 | 0.0005 | 0.0056 | 0.66 | all_v2.0.4073.C<br>1               | unclassified                                                                                                                                                                                                                                                                                                                                                                                                                                                                                                                   |
| 42233 | -3.12 | 0.13 | 0.0007 | 0.0071 | 0.65 | sb_gmnbpcic_0<br>005o11.pDNRF<br>2 | Skint 2 isoform b precursor; n=6; Mus musculus Rep: Skint 2 isoform b precursor - Mus musculus (Mouse)                                                                                                                                                                                                                                                                                                                                                                                                                         |
| 45751 | -4.33 | 0.08 | 0.0001 | 0.0018 | 0.65 | all_v2.0.17438.<br>C1.a            | non-directed                                                                                                                                                                                                                                                                                                                                                                                                                                                                                                                   |
| 46142 | -3.36 | 0.13 | 0.0004 | 0.0047 | 0.65 | sb_gmapte_001<br>3b05.pDNRF2       | reverse transcriptase [Oryzias latipes]<br>WD repeat-containing protein 82; n=16; Euteleostomi Rep: WD repeat-containing protein 82 - Homo sapiens (Human)                                                                                                                                                                                                                                                                                                                                                                     |
| 43245 | -4.34 | 0.09 | 0.0001 | 0.0018 | 0.65 | all_v2.0.2844.C<br>1               | KH domain-containing, RNA-binding, signal transduction-associated protein 1 (p21 Ras GTPase-activating protein-associated p62) (GAP- associated tyrosine phosphoprotein p62) (Src-associated in mitosis 68 kDa protein) (Sam68) (p68).; n=1; Takifugu rubripes Rep: KH domain-containing, RNA-binding, signal transduction-associated protein 1 (p21 Ras GTPase-activating protein-associated p62) (GAP- associated tyrosine phosphoprotein p62) (Src-associated in mitosis 68 kDa protein) (Sam68) (p68). - Takifugu rubripes |
| 38713 | -3.12 | 0.13 | 0.0007 | 0.0070 | 0.65 | all_v2.0.1579.C<br>2               |                                                                                                                                                                                                                                                                                                                                                                                                                                                                                                                                |
| 51999 | -3.39 | 0.12 | 0.0004 | 0.0045 | 0.65 | all_v2.0.10328.<br>C1              | unclassified                                                                                                                                                                                                                                                                                                                                                                                                                                                                                                                   |
| 45693 | -3.26 | 0.14 | 0.0005 | 0.0055 | 0.65 | all_v2.0.18093.<br>C1              | non-directed                                                                                                                                                                                                                                                                                                                                                                                                                                                                                                                   |
| 50810 | -3.15 | 0.14 | 0.0006 | 0.0067 | 0.65 | all_v2.0.4720.C<br>1               | unclassified                                                                                                                                                                                                                                                                                                                                                                                                                                                                                                                   |
| 46695 | -3.70 | 0.11 | 0.0002 | 0.0030 | 0.65 | all_v2.0.5132.C<br>1               | Unassigned protein<br>RING finger protein 11; n=20; Euteleostomi Rep: RING finger protein 11 - Homo sapiens (Human)                                                                                                                                                                                                                                                                                                                                                                                                            |
| 41925 | -3.22 | 0.14 | 0.0005 | 0.0059 | 0.65 | sb_gmnlmfta_0<br>004f17.t7         |                                                                                                                                                                                                                                                                                                                                                                                                                                                                                                                                |
| 50513 | -3.27 | 0.14 | 0.0005 | 0.0055 | 0.64 | all_v2.0.6080.C<br>2               | unclassified                                                                                                                                                                                                                                                                                                                                                                                                                                                                                                                   |
| 51502 | -4.24 | 0.09 | 0.0001 | 0.0019 | 0.64 | all_v2.0.16235.<br>C1              | unclassified                                                                                                                                                                                                                                                                                                                                                                                                                                                                                                                   |
| 51036 | -3.27 | 0.15 | 0.0005 | 0.0054 | 0.64 | all_v2.0.6393.C<br>1               | unclassified<br>Extracellular matrix protein 1 precursor (Secretory component p85).; n=1; Takifugu rubripes Rep: Extracellular matrix protein 1 precursor (Secretory component p85). - Takifugu rubripes                                                                                                                                                                                                                                                                                                                       |
| 37140 | -3.09 | 0.15 | 0.0007 | 0.0075 | 0.64 | all_v2.0.2749.C<br>1               |                                                                                                                                                                                                                                                                                                                                                                                                                                                                                                                                |
| 53699 | -3.09 | 0.16 | 0.0007 | 0.0075 | 0.64 | all_v2.0.11216.<br>C1              | unclassified                                                                                                                                                                                                                                                                                                                                                                                                                                                                                                                   |
| 53248 | -3.14 | 0.15 | 0.0006 | 0.0068 | 0.63 | all_v2.0.5766.C<br>1               | unclassified                                                                                                                                                                                                                                                                                                                                                                                                                                                                                                                   |
| 43896 | -4.10 | 0.10 | 0.0001 | 0.0021 | 0.63 | all_v2.0.16541.<br>C1              | Zgc:64130; n=1; Danio rerio Rep: Zgc:64130 - Danio rerio (Zebrafish) (Brachydanio rerio)                                                                                                                                                                                                                                                                                                                                                                                                                                       |

|       |       |      |        |        |      |                             |                                                                                                                                                                                                                                                                                                                                |
|-------|-------|------|--------|--------|------|-----------------------------|--------------------------------------------------------------------------------------------------------------------------------------------------------------------------------------------------------------------------------------------------------------------------------------------------------------------------------|
| 51181 | -3.92 | 0.12 | 0.0001 | 0.0024 | 0.63 | all_v2.0.16785.C1           | unclassified                                                                                                                                                                                                                                                                                                                   |
| 51568 | -4.44 | 0.09 | 0.0001 | 0.0017 | 0.63 | all_v2.0.6708.C1            | unclassified                                                                                                                                                                                                                                                                                                                   |
| 36880 | -3.05 | 0.15 | 0.0008 | 0.0078 | 0.63 | sb_gmnlsric_003a20.t7       | DNA damage-binding protein 1; n=21; Tetrapoda Rep: DNA damage-binding protein 1 - Homo sapiens (Human) Simple type II keratin K8a; n=3;                                                                                                                                                                                        |
| 42217 | -4.54 | 0.09 | 0.0001 | 0.0016 | 0.62 | sb_gmnbspic_013h24.pDNRm13r | Oncorhynchus Rep: Simple type II keratin K8a - Oncorhynchus mykiss (Rainbow trout) (Salmo gairdneri) Protein FAM13C1.; n=1; Xenopus tropicalis Rep: Protein FAM13C1. - Xenopus tropicalis                                                                                                                                      |
| 41460 | -3.00 | 0.17 | 0.0009 | 0.0085 | 0.62 | all_v2.0.10923.C2           | GPI ethanolamine phosphate transferase 1 (EC 2.-.-) (Phosphatidylinositol-glycan biosynthesis class N protein) (PIG-N) (MCD4 homolog).; n=1; Takifugu rubripes Rep: GPI ethanolamine phosphate transferase 1 (EC 2.-.-) (Phosphatidylinositol-glycan biosynthesis class N protein) (PIG-N) (MCD4 homolog). - Takifugu rubripes |
| 37459 | -4.01 | 0.11 | 0.0001 | 0.0022 | 0.62 | all_v2.0.5186.C1            | Methyl-CpG binding protein MBD3; n=3; Xenopus Rep: Methyl-CpG binding protein MBD3 - Xenopus laevis (African clawed frog)                                                                                                                                                                                                      |
| 38986 | -4.18 | 0.11 | 0.0001 | 0.0020 | 0.62 | all_v2.0.2756.C1            | Homolog of Homo sapiens TiTin isoform novex-2; n=1; Takifugu rubripes Rep: Homolog of Homo sapiens TiTin isoform novex-2 - Takifugu rubripes                                                                                                                                                                                   |
| 38411 | -3.20 | 0.16 | 0.0006 | 0.0061 | 0.62 | sb_gmapht_0010p17.pDNRF2    | Collagen alpha-1(I) chain precursor (Alpha-1 type I collagen).; n=1; Takifugu rubripes Rep: Collagen alpha-1(I) chain precursor (Alpha-1 type I collagen). - Takifugu rubripes                                                                                                                                                 |
| 36585 | -4.35 | 0.10 | 0.0001 | 0.0018 | 0.61 | all_v2.0.18719.C1           |                                                                                                                                                                                                                                                                                                                                |
| 51529 | -3.37 | 0.15 | 0.0004 | 0.0046 | 0.61 | all_v2.0.6456.C1            | unclassified                                                                                                                                                                                                                                                                                                                   |
| 53664 | -3.18 | 0.17 | 0.0006 | 0.0063 | 0.61 | all_v2.0.9611.C1            | unclassified                                                                                                                                                                                                                                                                                                                   |
| 38008 | -3.35 | 0.15 | 0.0004 | 0.0048 | 0.61 | sb_gmnbmd_0014k10.pDNRm13r  | Homolog of Homo sapiens Calpain 1, large [catalytic] subunit; n=1; Takifugu rubripes Rep: Homolog of Homo sapiens Calpain 1, large [catalytic] subunit - Takifugu rubripes                                                                                                                                                     |
| 35883 | -3.79 | 0.13 | 0.0002 | 0.0028 | 0.61 | all_v2.0.2916.C1            | Alpha-enolase; n=4; Rattus norvegicus Rep: Alpha-enolase - Rattus norvegicus (Rat)                                                                                                                                                                                                                                             |
| 35733 | -3.20 | 0.17 | 0.0005 | 0.0061 | 0.61 | sb_gmnbm_001m08.pDNRF2      | Acetylcholine receptor subunit alpha precursor; n=2; Clupeocephala Rep: Acetylcholine receptor subunit alpha precursor - Brachydanio rerio (Zebrafish) (Danio rerio)                                                                                                                                                           |
| 44357 | -3.92 | 0.12 | 0.0001 | 0.0024 | 0.61 | all_v2.0.4599.C1            | Caldesmon multi-domain protein                                                                                                                                                                                                                                                                                                 |
| 46425 | -4.18 | 0.12 | 0.0001 | 0.0020 | 0.60 | all_v2.0.13812.C1           | Unassigned protein                                                                                                                                                                                                                                                                                                             |
| 41688 | -3.47 | 0.15 | 0.0003 | 0.0041 | 0.60 | all_v2.0.4385.C1            | Ras GTPase-activating-like protein IQGAP2.; n=1; Takifugu rubripes Rep: Ras GTPase-activating-like protein IQGAP2. - Takifugu rubripes                                                                                                                                                                                         |
| 47021 | -3.47 | 0.15 | 0.0003 | 0.0041 | 0.60 | sb_gmnbhkas_0005f08.pDNRF2  | Unassigned protein                                                                                                                                                                                                                                                                                                             |
| 35935 | -4.21 | 0.12 | 0.0001 | 0.0020 | 0.60 | all_v2.0.3080.C1            | Annexin max3; n=1; Oryzias latipes Rep: Annexin max3 - Oryzias latipes (Medaka fish) (Japanese ricefish)                                                                                                                                                                                                                       |
| 37449 | -3.82 | 0.13 | 0.0002 | 0.0027 | 0.60 | sb_gmnlpbia_0002g08.t7      | Golgi-specific brefeldin A-resistance guanine nucleotide exchange factor 1; n=29; Theria Rep: Golgi-specific brefeldin                                                                                                                                                                                                         |

|       |       |      |        |        |      |                                    |  |  |  | A-resistance guanine nucleotide exchange factor 1 - Homo sapiens (Human)                                                                                                                                                                         |  |
|-------|-------|------|--------|--------|------|------------------------------------|--|--|--|--------------------------------------------------------------------------------------------------------------------------------------------------------------------------------------------------------------------------------------------------|--|
| 46669 | -3.90 | 0.13 | 0.0001 | 0.0025 | 0.60 | sb_gmapht_002<br>9n18.pDNRF2       |  |  |  | Unassigned protein                                                                                                                                                                                                                               |  |
| 51982 | -4.32 | 0.11 | 0.0001 | 0.0018 | 0.60 | all_v2.0.6362.C<br>1               |  |  |  | unclassified                                                                                                                                                                                                                                     |  |
|       |       |      |        |        |      |                                    |  |  |  | Homolog of Brachydanio rerio Cyclin D1.; n=1; Takifugu rubripes Rep:                                                                                                                                                                             |  |
| 37695 | -3.54 | 0.15 | 0.0003 | 0.0037 | 0.60 | all_v2.0.14920.<br>C1              |  |  |  | Homolog of Brachydanio rerio Cyclin D1.<br>- Takifugu rubripes                                                                                                                                                                                   |  |
| 46750 | -3.99 | 0.13 | 0.0001 | 0.0023 | 0.59 | sb_gmnbspic_0<br>013h20.pDNRF<br>2 |  |  |  | Unassigned protein                                                                                                                                                                                                                               |  |
| 52562 | -3.30 | 0.18 | 0.0004 | 0.0052 | 0.59 | all_v2.0.8055.C<br>1               |  |  |  | unclassified                                                                                                                                                                                                                                     |  |
| 45607 | -3.02 | 0.19 | 0.0009 | 0.0084 | 0.59 | all_v2.0.11441.<br>C1              |  |  |  | non-directed                                                                                                                                                                                                                                     |  |
| 51735 | -4.34 | 0.12 | 0.0001 | 0.0018 | 0.59 | all_v2.0.9513.C<br>1               |  |  |  | unclassified                                                                                                                                                                                                                                     |  |
| 50500 | -3.25 | 0.18 | 0.0005 | 0.0056 | 0.59 | all_v2.0.9176.C<br>1               |  |  |  | unclassified                                                                                                                                                                                                                                     |  |
|       |       |      |        |        |      |                                    |  |  |  | CUB and sushi domain-containing protein 3 precursor (CUB and sushi multiple domains protein 3).; n=1; Takifugu rubripes Rep: CUB and sushi domain-containing protein 3 precursor (CUB and sushi multiple domains protein 3). - Takifugu rubripes |  |
| 36693 | -3.81 | 0.14 | 0.0002 | 0.0027 | 0.59 | all_v2.0.6166.C<br>1               |  |  |  | Zgc:158393; n=5; Danio rerio Rep: Zgc:158393 - Brachydanio rerio (Zebrafish) (Danio rerio)                                                                                                                                                       |  |
| 43747 | -4.78 | 0.11 | 0.0001 | 0.0015 | 0.58 | sb_gmnlsric_00<br>02i16.t7         |  |  |  | Zgc:153093; n=2; Danio rerio Rep: Zgc:153093 - Danio rerio (Zebrafish) (Brachydanio rerio)                                                                                                                                                       |  |
| 43654 | -3.92 | 0.15 | 0.0001 | 0.0024 | 0.58 | all_v2.0.5364.C<br>1               |  |  |  | Zgc:65861; n=1; Danio rerio Rep: Zgc:65861 - Danio rerio (Zebrafish) (Brachydanio rerio)                                                                                                                                                         |  |
| 43904 | -3.49 | 0.19 | 0.0003 | 0.0040 | 0.57 | all_v2.0.16778.<br>C1              |  |  |  |                                                                                                                                                                                                                                                  |  |
| 50459 | -3.56 | 0.17 | 0.0003 | 0.0036 | 0.57 | all_v2.0.1012.C<br>1               |  |  |  | unclassified                                                                                                                                                                                                                                     |  |
| 54377 | -4.17 | 0.14 | 0.0001 | 0.0020 | 0.56 | all_v2.0.82.C1                     |  |  |  | unclassified                                                                                                                                                                                                                                     |  |
| 50418 | -3.24 | 0.20 | 0.0005 | 0.0057 | 0.56 | all_v2.0.7784.C<br>1               |  |  |  | unclassified                                                                                                                                                                                                                                     |  |
| 49561 | -4.21 | 0.14 | 0.0001 | 0.0020 | 0.55 | all_v2.0.3485.C<br>1               |  |  |  | unclassified                                                                                                                                                                                                                                     |  |
| 49797 | -3.69 | 0.18 | 0.0002 | 0.0031 | 0.55 | all_v2.0.4315.C<br>1               |  |  |  | unclassified                                                                                                                                                                                                                                     |  |
| 49079 | -3.19 | 0.24 | 0.0006 | 0.0062 | 0.55 | all_v2.0.8699.C<br>1               |  |  |  | unclassified                                                                                                                                                                                                                                     |  |
| 49726 | -3.11 | 0.21 | 0.0007 | 0.0071 | 0.55 | all_v2.0.9180.C<br>1               |  |  |  | unclassified                                                                                                                                                                                                                                     |  |
|       |       |      |        |        |      |                                    |  |  |  | Annexin max3; n=1; Oryzias latipes Rep: Annexin max3 - Oryzias latipes (Medaka fish) (Japanese ricefish)                                                                                                                                         |  |
| 35934 | -5.37 | 0.10 | 0.0000 | 0.0013 | 0.55 | all_v2.0.3080.C<br>3               |  |  |  |                                                                                                                                                                                                                                                  |  |
| 50184 | -3.02 | 0.21 | 0.0009 | 0.0084 | 0.54 | all_v2.0.7282.C<br>2               |  |  |  | unclassified                                                                                                                                                                                                                                     |  |
|       |       |      |        |        |      |                                    |  |  |  | Neuroblast differentiation-associated protein AHNAK (Desmoyokin) (Fragments).; n=1; Takifugu rubripes Rep: Neuroblast differentiation-associated protein AHNAK (Desmoyokin) (Fragments). - Takifugu rubripes                                     |  |
| 39310 | -4.54 | 0.14 | 0.0001 | 0.0016 | 0.54 | all_v2.0.13511.<br>C1              |  |  |  | Homolog of Gallus gallus Stathmin.; n=1; Takifugu rubripes Rep: Homolog of Gallus gallus Stathmin. - Takifugu rubripes                                                                                                                           |  |
| 37939 | -3.85 | 0.17 | 0.0002 | 0.0026 | 0.54 | sb_gmnlem_00<br>14k01.sp6          |  |  |  |                                                                                                                                                                                                                                                  |  |
| 48737 | -4.10 | 0.16 | 0.0001 | 0.0021 | 0.54 | sb_gmlbgits_00<br>04114.sp6        |  |  |  | Unassigned protein                                                                                                                                                                                                                               |  |
|       |       |      |        |        |      |                                    |  |  |  | Four and a half LIM domains a; n=3; Danio rerio Rep: Four and a half LIM domains a - Danio rerio (Zebrafish) (Brachydanio rerio)                                                                                                                 |  |
| 37254 | -3.54 | 0.19 | 0.0003 | 0.0037 | 0.53 | all_v2.0.2576.C<br>1               |  |  |  |                                                                                                                                                                                                                                                  |  |

|       |       |      |        |        |      |                              |                                                                                                                                                                                                                                                                                    |
|-------|-------|------|--------|--------|------|------------------------------|------------------------------------------------------------------------------------------------------------------------------------------------------------------------------------------------------------------------------------------------------------------------------------|
| 35890 | -5.36 | 0.11 | 0.0000 | 0.0014 | 0.52 | sb_gmnbm0_0014g13.pDNRF2     | Amine oxidase [flavin-containing]; n=1; Oncorhynchus mykiss Rep: Amine oxidase [flavin-containing] - Oncorhynchus mykiss (Rainbow trout) (Salmo gairdneri)                                                                                                                         |
| 54441 | -3.33 | 0.25 | 0.0004 | 0.0049 | 0.52 | all_v2.0.10503.C1            | unclassified<br>PREDICTED: similar to spermatogenesis and oogenesis specific basic helix-loop-helix 1; n=1; Rattus norvegicus Rep: PREDICTED: similar to spermatogenesis and oogenesis specific basic helix-loop-helix 1 - Rattus norvegicus                                       |
| 41032 | -5.91 | 0.10 | 0.0000 | 0.0013 | 0.52 | all_v2.0.6546.C1             | Guanine nucleotide-binding protein G(o) subunit alpha 2; n=18; Tetrapoda Rep: Guanine nucleotide-binding protein G(o) subunit alpha 2 - Homo sapiens (Human)                                                                                                                       |
| 37518 | -5.11 | 0.13 | 0.0000 | 0.0014 | 0.51 | sb_gmnlsfc_0002k09.t7        | unclassified                                                                                                                                                                                                                                                                       |
| 55146 | -3.51 | 0.22 | 0.0003 | 0.0038 | 0.51 | all_v2.0.712.C1              | Homolog of Homo sapiens Alanine aminotransferase; n=1; Takifugu rubripes Rep: Homolog of Homo sapiens Alanine aminotransferase - Takifugu rubripes                                                                                                                                 |
| 37965 | -5.05 | 0.14 | 0.0000 | 0.0014 | 0.50 | all_v2.0.9443.C1             | Type 1 collagen alpha 2; n=1; Paralichthys olivaceus Rep: Type 1 collagen alpha 2 - Paralichthys olivaceus (Japanese flounder) glycosyltransferase 1 domain containing 1; n=1; Takifugu rubripes Rep: glycosyltransferase 1 domain containing 1 - Takifugu rubripes                |
| 42849 | -3.67 | 0.20 | 0.0002 | 0.0031 | 0.50 | all_v2.0.1438.C1             | unclassified                                                                                                                                                                                                                                                                       |
| 37428 | -3.01 | 0.28 | 0.0009 | 0.0084 | 0.50 | all_v2.0.11762.C1            | Tetraspanin-6 (Tspan-6) (Transmembrane 4 superfamily member 6) (T245 protein) (Tetraspanin TM4-D) (A15 homolog).; n=1; Takifugu rubripes Rep: Tetraspanin-6 (Tspan-6) (Transmembrane 4 superfamily member 6) (T245 protein) (Tetraspanin TM4-D) (A15 homolog). - Takifugu rubripes |
| 54918 | -3.54 | 0.22 | 0.0003 | 0.0037 | 0.50 | all_v2.0.897.C1              | unclassified                                                                                                                                                                                                                                                                       |
| 42517 | -3.10 | 0.29 | 0.0007 | 0.0073 | 0.48 | all_v2.0.2825.C1             | Unassigned protein                                                                                                                                                                                                                                                                 |
| 49669 | -3.16 | 0.26 | 0.0006 | 0.0066 | 0.48 | all_v2.0.13190.C1            | non-directed                                                                                                                                                                                                                                                                       |
| 48024 | -5.63 | 0.13 | 0.0000 | 0.0013 | 0.48 | sb_gmnbpcic_0007c20.pDNRM13r | Dynein light chain roadblock-type 2; n=9; Tetrapoda Rep: Dynein light chain roadblock-type 2 - Homo sapiens (Human)                                                                                                                                                                |
| 45826 | -3.25 | 0.31 | 0.0005 | 0.0056 | 0.47 | all_v2.0.15558.C1            | Fatty acid binding protein 11; n=1; Danio rerio Rep: Fatty acid binding protein 11 - Danio rerio (Zebrafish) (Brachydanio rerio)                                                                                                                                                   |
| 36958 | -3.42 | 0.26 | 0.0003 | 0.0043 | 0.47 | all_v2.0.5448.C1             | unclassified                                                                                                                                                                                                                                                                       |
| 37172 | -3.57 | 0.25 | 0.0003 | 0.0036 | 0.47 | all_v2.0.492.C1              | unclassified                                                                                                                                                                                                                                                                       |
| 49819 | -3.36 | 0.27 | 0.0004 | 0.0047 | 0.46 | all_v2.0.11870.C1            | unclassified                                                                                                                                                                                                                                                                       |
| 51386 | -3.07 | 0.28 | 0.0008 | 0.0077 | 0.45 | all_v2.0.3084.C1             | unclassified                                                                                                                                                                                                                                                                       |
| 39361 | -4.10 | 0.24 | 0.0001 | 0.0021 | 0.44 | sb_gmapte_0010h11.pDNRF2     | Novel AMP-binding enzyme domain containing protein; n=2; Danio rerio Rep: Novel AMP-binding enzyme domain containing protein - Danio rerio (Zebrafish) (Brachydanio rerio)                                                                                                         |
| 47511 | -3.18 | 0.36 | 0.0006 | 0.0063 | 0.43 | sb_gmnlla_0025g11.t7         | Unassigned protein                                                                                                                                                                                                                                                                 |
| 38596 | -4.81 | 0.21 | 0.0001 | 0.0015 | 0.42 | all_v2.0.8452.C1             | Interferon induced protein 2; n=1; Ictalurus punctatus Rep: Interferon induced protein 2 - Ictalurus punctatus (Channel catfish)                                                                                                                                                   |
| 42848 | -4.10 | 0.26 | 0.0001 | 0.0021 | 0.39 | all_v2.0.1438.C1             | Type 1 collagen alpha 2; n=1; Paralichthys                                                                                                                                                                                                                                         |

|       |       |      |        |        |      |                                     |                                                                                                                                                                                                                                                                      |
|-------|-------|------|--------|--------|------|-------------------------------------|----------------------------------------------------------------------------------------------------------------------------------------------------------------------------------------------------------------------------------------------------------------------|
|       |       |      |        |        |      | 2                                   | olivaceus Rep: Type 1 collagen alpha 2 - Paralichthys olivaceus (Japanese flounder)                                                                                                                                                                                  |
| 45392 | -6.82 | 0.14 | 0.0000 | 0.0012 | 0.38 | all_v2.0.341.C5                     | Metallothio domain containing protein                                                                                                                                                                                                                                |
| 50333 | -4.02 | 0.30 | 0.0001 | 0.0022 | 0.37 | all_v2.0.6062.C<br>1                | unclassified<br>Membrane cofactor protein precursor (CD46 antigen) (Trophoblast leukocyte common antigen) (TLX).; n=1; Xenopus tropicalis Rep: Membrane cofactor protein precursor (CD46 antigen) (Trophoblast leukocyte common antigen) (TLX). - Xenopus tropicalis |
| 38960 | -3.00 | 0.41 | 0.0009 | 0.0086 | 0.35 | all_v2.0.8721.C<br>1                | Type I keratin S8; n=1; Oncorhynchus mykiss Rep: Type I keratin S8 - Oncorhynchus mykiss (Rainbow trout) (Salmo gairdneri)                                                                                                                                           |
| 42857 | -9.70 | 0.11 | 0.0000 | 0.0012 | 0.33 | all_v2.0.7963.C<br>1                |                                                                                                                                                                                                                                                                      |
| 47254 | -3.26 | 0.57 | 0.0005 | 0.0055 | 0.30 | sb_gmnlkic_00<br>09m15.pDNRm<br>13r | Unassigned protein                                                                                                                                                                                                                                                   |

<sup>a</sup>Fold-changes are presented as outputted by siggenes and were calculated as pIC/PBS

Supplemental Table S5. 246 genes differentially expressed between fish injected with pIC or PBS at 16°C and sampled at 24HPI

| Probe ID | d-value | Stdev | Raw p  | q-value | Fold Change <sup>a</sup> | Sequence Name          | Gene Name                                                                                                                                                                                                  |
|----------|---------|-------|--------|---------|--------------------------|------------------------|------------------------------------------------------------------------------------------------------------------------------------------------------------------------------------------------------------|
| 38604    | 13.72   | 0.36  | 0.0000 | 0.0015  | 38.85                    | all_v2.0.14.CB2        | Interferon stimulated gene 15; n=1; Gadus morhua Rep: Interferon stimulated gene 15 - Gadus morhua (Atlantic cod)                                                                                          |
| 45882    | 9.62    | 0.50  | 0.0000 | 0.0016  | 31.10                    | all_v2.0.5246.C1       | non-directed                                                                                                                                                                                               |
| 38605    | 11.71   | 0.38  | 0.0000 | 0.0015  | 25.29                    | all_v2.0.14.C13        | Interferon stimulated gene 15; n=1; Gadus morhua Rep: Interferon stimulated gene 15 - Gadus morhua (Atlantic cod)                                                                                          |
| 41316    | 6.11    | 0.54  | 0.0000 | 0.0025  | 12.55                    | all_v2.0.1009.C5       | Probable ATP-dependent helicase LGP2 (EC 3.6.1.-) (Protein D11Lgp2 homolog).; n=1; Takifugu rubripes Rep: Probable ATP-dependent helicase LGP2 (EC 3.6.1.-) (Protein D11Lgp2 homolog). - Takifugu rubripes |
| 38614    | 13.59   | 0.24  | 0.0000 | 0.0015  | 12.35                    | all_v2.0.7062.C2       | Interferon stimulated gene 15; n=1; Gadus morhua Rep: Interferon stimulated gene 15 - Gadus morhua (Atlantic cod)                                                                                          |
| 44590    | 6.34    | 0.50  | 0.0000 | 0.0023  | 12.13                    | DXH4a                  | custom - probable ATP-dependent RNA helicase DHX                                                                                                                                                           |
| 38611    | 6.83    | 0.48  | 0.0000 | 0.0019  | 11.80                    | all_v2.0.1767.C1       | Interferon stimulated gene 15; n=1; Gadus morhua Rep: Interferon stimulated gene 15 - Gadus morhua (Atlantic cod)                                                                                          |
| 48390    | 5.91    | 0.62  | 0.0000 | 0.0027  | 11.53                    | all_v2.0.15354.C1      | Unassigned protein                                                                                                                                                                                         |
| 47164    | 4.91    | 0.81  | 0.0000 | 0.0051  | 11.19                    | all_v2.0.6027.C6       | Unassigned protein                                                                                                                                                                                         |
| 38609    | 12.44   | 0.24  | 0.0000 | 0.0015  | 10.49                    | all_v2.0.14.C3         | Interferon stimulated gene 15; n=1; Gadus morhua Rep: Interferon stimulated gene 15 - Gadus morhua (Atlantic cod)                                                                                          |
| 38356    | 5.37    | 0.60  | 0.0000 | 0.0036  | 9.88                     | all_v2.0.415.C6        | Homolog of Homo sapiens Spastic ataxia of Charlevoix-Saguenay; n=1; Takifugu rubripes Rep: Homolog of Homo sapiens Spastic ataxia of Charlevoix-Saguenay - Takifugu rubripes                               |
| 38613    | 11.08   | 0.26  | 0.0000 | 0.0015  | 9.45                     | all_v2.0.14.CB5        | Interferon stimulated gene 15; n=1; Gadus morhua Rep: Interferon stimulated gene 15 - Gadus morhua (Atlantic cod)                                                                                          |
| 38606    | 12.80   | 0.22  | 0.0000 | 0.0015  | 9.30                     | all_v2.0.14.CB4        | Interferon stimulated gene 15; n=1; Gadus morhua Rep: Interferon stimulated gene 15 - Gadus morhua (Atlantic cod)                                                                                          |
| 38608    | 15.21   | 0.17  | 0.0000 | 0.0015  | 8.87                     | all_v2.0.14.C12        | Interferon stimulated gene 15; n=1; Gadus morhua Rep: Interferon stimulated gene 15 - Gadus morhua (Atlantic cod)                                                                                          |
| 44453    | 5.01    | 0.75  | 0.0000 | 0.0045  | 7.63                     | CK10a                  | custom - CC chemokine                                                                                                                                                                                      |
| 44589    | 4.45    | 0.56  | 0.0001 | 0.0080  | 7.32                     | DXH3b                  | custom - probable ATP-dependent RNA helicase DHX                                                                                                                                                           |
| 44448    | 4.92    | 0.71  | 0.0000 | 0.0050  | 7.28                     | CK10ad                 | custom - CC chemokine                                                                                                                                                                                      |
| 43785    | 3.45    | 0.59  | 0.0009 | 0.0255  | 7.25                     | all_v2.0.2417.C1       | Zgc:162304 protein; n=1; Danio rerio Rep: Zgc:162304 protein - Danio rerio (Zebrafish) (Brachydanio rerio)                                                                                                 |
| 38638    | 5.30    | 0.48  | 0.0000 | 0.0037  | 6.92                     | all_v2.0.638.C1        | Interleukin-8 variant 2; n=3; Ictalurus punctatus Rep: Interleukin-8 variant 2 - Ictalurus punctatus (Channel catfish)                                                                                     |
| 35718    | 8.67    | 0.29  | 0.0000 | 0.0016  | 6.12                     | sb_gmnbhkas_0013h13.pD | A disintegrin and metalloproteinase domain 8; n=1; Danio rerio Rep: A disintegrin and metalloproteinase domain 8 - Brachydanio rerio (Zebrafish) (Danio rerio)                                             |
| 47329    | 9.48    | 0.24  | 0.0000 | 0.0016  | 5.81                     | all_v2.0.415.C3        | Unassigned protein                                                                                                                                                                                         |
| 44588    | 5.29    | 0.38  | 0.0000 | 0.0037  | 5.22                     | DXH2b                  | custom - probable ATP-dependent RNA helicase DHX                                                                                                                                                           |
| 41269    | 5.55    | 0.40  | 0.0000 | 0.0033  | 5.07                     | sb_gmnlbfic_0004o20.t7 | PREDICTED: similar to zinc finger, NFX1-type containing 1; n=3; Laurasiatheria Rep: PREDICTED: similar to zinc finger, NFX1-                                                                               |

|       |       |      |        |        |      |                                                                                                                                                                                                            |
|-------|-------|------|--------|--------|------|------------------------------------------------------------------------------------------------------------------------------------------------------------------------------------------------------------|
|       |       |      |        |        |      | type containing 1 - Equus caballus                                                                                                                                                                         |
|       |       |      |        |        |      | Probable ATP-dependent helicase LGP2 (EC 3.6.1.-) (Protein D11Lgp2 homolog).; n=1; Takifugu rubripes Rep: Probable ATP-dependent helicase LGP2 (EC 3.6.1.-) (Protein D11Lgp2 homolog). - Takifugu rubripes |
| 41314 | 4.70  | 0.47 | 0.0001 | 0.0062 | 5.06 | all_v2.0.5598_C1                                                                                                                                                                                           |
| 44859 | 8.17  | 0.26 | 0.0000 | 0.0016 | 4.98 | all_v2.0.314.C1                                                                                                                                                                                            |
|       |       |      |        |        |      | HECT domain containing protein                                                                                                                                                                             |
| 46200 | 5.90  | 0.37 | 0.0000 | 0.0027 | 4.90 | all_v2.0.1457_5.C1                                                                                                                                                                                         |
|       |       |      |        |        |      | SACS; saccin                                                                                                                                                                                               |
|       |       |      |        |        |      | Interferon stimulated gene 15; n=1; Gadus morhua Rep: Interferon stimulated gene 15 - Gadus morhua (Atlantic cod)                                                                                          |
| 38603 | 8.30  | 0.23 | 0.0000 | 0.0016 | 4.61 | all_v2.0.14.C_B7                                                                                                                                                                                           |
|       |       |      |        |        |      | Interferon stimulated gene 15; n=1; Gadus morhua Rep: Interferon stimulated gene 15 - Gadus morhua (Atlantic cod)                                                                                          |
| 38612 | 6.39  | 0.32 | 0.0000 | 0.0023 | 4.41 | all_v2.0.14.C_B3                                                                                                                                                                                           |
|       |       |      |        |        |      | NFX1-type zinc finger-containing protein 1; n=5; Eutheria Rep: NFX1-type zinc finger-containing protein 1 - Homo sapiens (Human)                                                                           |
| 39328 | 7.51  | 0.25 | 0.0000 | 0.0016 | 4.38 | all_v2.0.2213_C1                                                                                                                                                                                           |
|       |       |      |        |        |      | Homolog of Homo sapiens Probable ATP-dependent helicase LGP2; n=1; Takifugu rubripes Rep: Homolog of Homo sapiens Probable ATP-dependent helicase LGP2 - Takifugu rubripes                                 |
| 38285 | 5.11  | 0.38 | 0.0000 | 0.0041 | 4.18 | sb_gmnlbfc_0007k16.t17                                                                                                                                                                                     |
| 48258 | 10.35 | 0.16 | 0.0000 | 0.0015 | 4.01 | all_v2.0.1492_6.C1                                                                                                                                                                                         |
|       |       |      |        |        |      | Unassigned protein                                                                                                                                                                                         |
|       |       |      |        |        |      | Homolog of Homo sapiens Spastic ataxia of Charlevoix-Saguenay; n=1; Takifugu rubripes Rep: Homolog of Homo sapiens Spastic ataxia of Charlevoix-Saguenay - Takifugu rubripes                               |
| 38358 | 5.51  | 0.37 | 0.0000 | 0.0033 | 3.91 | all_v2.0.9190_C1                                                                                                                                                                                           |
|       |       |      |        |        |      | Homolog of Homo sapiens Spastic ataxia of Charlevoix-Saguenay; n=1; Takifugu rubripes Rep: Homolog of Homo sapiens Spastic ataxia of Charlevoix-Saguenay - Takifugu rubripes                               |
| 38354 | 5.60  | 0.35 | 0.0000 | 0.0032 | 3.78 | all_v2.0.707.C4                                                                                                                                                                                            |
| 47384 | 6.52  | 0.28 | 0.0000 | 0.0022 | 3.78 | all_v2.0.707.C1                                                                                                                                                                                            |
|       |       |      |        |        |      | Unassigned protein                                                                                                                                                                                         |
|       |       |      |        |        |      | 1AY614591_Gadus morhua CC chemokine type 2 mRNA, complete cds                                                                                                                                              |
| 44465 | 4.15  | 0.40 | 0.0002 | 0.0119 | 3.76 | 2AY614591_Gadus morhua CC chemokine type 2 mRNA, complete cds                                                                                                                                              |
|       |       |      |        |        |      | custom - CC chemokine                                                                                                                                                                                      |
| 44467 | 5.00  | 0.34 | 0.0000 | 0.0046 | 3.69 | complete cds                                                                                                                                                                                               |
|       |       |      |        |        |      | custom - CC chemokine                                                                                                                                                                                      |
| 38639 | 5.25  | 0.30 | 0.0000 | 0.0037 | 3.60 | all_v2.0.638.CB1                                                                                                                                                                                           |
|       |       |      |        |        |      | Interleukin-8 variant 2; n=3; Ictalurus punctatus Rep: Interleukin-8 variant 2 - Ictalurus punctatus (Channel catfish)                                                                                     |
|       |       |      |        |        |      | 1AY614592_Gadus morhua CC chemokine type 3 mRNA, complete cds                                                                                                                                              |
| 44471 | 5.70  | 0.29 | 0.0000 | 0.0031 | 3.60 | complete cds                                                                                                                                                                                               |
|       |       |      |        |        |      | custom - CC chemokine                                                                                                                                                                                      |
| 44456 | 4.81  | 0.34 | 0.0001 | 0.0055 | 3.51 | CK2c5                                                                                                                                                                                                      |
|       |       |      |        |        |      | custom - CC chemokine                                                                                                                                                                                      |
|       |       |      |        |        |      | Homolog of Homo sapiens Spastic ataxia of Charlevoix-Saguenay; n=1; Takifugu rubripes Rep: Homolog of Homo sapiens Spastic ataxia of Charlevoix-Saguenay -                                                 |
| 38359 | 5.53  | 0.33 | 0.0000 | 0.0033 | 3.50 | all_v2.0.415.C5                                                                                                                                                                                            |



|       |      |      |        |        |      | Takifugu rubripes                                             |                                                                                                                                                                                                            |
|-------|------|------|--------|--------|------|---------------------------------------------------------------|------------------------------------------------------------------------------------------------------------------------------------------------------------------------------------------------------------|
| 44910 | 7.56 | 0.21 | 0.0000 | 0.0016 | 3.48 | all_v2.0.3619.C2                                              | Ifi-6-16 multi-domain protein                                                                                                                                                                              |
| 47292 | 3.91 | 0.46 | 0.0003 | 0.0157 | 3.45 | all_v2.0.5356.C4                                              | Unassigned protein                                                                                                                                                                                         |
| 37854 | 3.46 | 0.43 | 0.0009 | 0.0253 | 3.41 | sb_gmnlsfic_0002b12.t7                                        | Homolog of Carassius auratus Interferon-inducible protein Gig2.; n=4; Takifugu rubripes Rep: Homolog of Carassius auratus Interferon-inducible protein Gig2. - Takifugu rubripes                           |
| 41313 | 3.83 | 0.40 | 0.0004 | 0.0171 | 3.38 | all_v2.0.1009.C1                                              | Probable ATP-dependent helicase LGP2 (EC 3.6.1.-) (Protein D11Lgp2 homolog).; n=1; Takifugu rubripes Rep: Probable ATP-dependent helicase LGP2 (EC 3.6.1.-) (Protein D11Lgp2 homolog). - Takifugu rubripes |
| 37456 | 3.94 | 0.40 | 0.0003 | 0.0152 | 3.36 | all_v2.0.93.C1                                                | Goose-type lysozyme 2; n=1; Gadus morhua Rep: Goose-type lysozyme 2 - Gadus morhua (Atlantic cod)                                                                                                          |
| 46226 | 8.14 | 0.18 | 0.0000 | 0.0016 | 3.35 | all_v2.0.415.C1                                               | Serpentine_recp domain containing protein                                                                                                                                                                  |
| 44454 | 4.74 | 0.33 | 0.0001 | 0.0059 | 3.26 | 1AY614590_Gadus morhua CC chemokine type 1 mRNA, complete cds | custom - CC chemokine                                                                                                                                                                                      |
| 44470 | 5.18 | 0.29 | 0.0000 | 0.0039 | 3.20 | CK2c1d                                                        | custom - CC chemokine                                                                                                                                                                                      |
| 44446 | 5.25 | 0.28 | 0.0000 | 0.0037 | 3.09 | CK2c3                                                         | custom - CC chemokine                                                                                                                                                                                      |
| 44464 | 3.97 | 0.40 | 0.0003 | 0.0148 | 3.04 | CK10add                                                       | custom - CC chemokine                                                                                                                                                                                      |
| 44324 | 5.95 | 0.23 | 0.0000 | 0.0027 | 3.04 | all_v2.0.1123.C1                                              | Atrophin-1 multi-domain protein                                                                                                                                                                            |
| 44584 | 3.88 | 0.35 | 0.0004 | 0.0164 | 3.00 | DXH1a                                                         | custom - probable ATP-dependent RNA helicase DHX                                                                                                                                                           |
| 41942 | 5.75 | 0.24 | 0.0000 | 0.0031 | 2.99 | all_v2.0.8660.C1                                              | RING finger protein 213; n=3; Homo sapiens Rep: RING finger protein 213 - Homo sapiens (Human)                                                                                                             |
| 36381 | 6.40 | 0.22 | 0.0000 | 0.0023 | 2.98 | all_v2.0.132.C9                                               | CC chemokine type 2; n=1; Gadus morhua Rep: CC chemokine type 2 - Gadus morhua (Atlantic cod)                                                                                                              |
| 42820 | 3.88 | 0.33 | 0.0004 | 0.0163 | 2.93 | all_v2.0.1349.C1                                              | Tubulin beta-2A chain; n=106; Eukaryota Rep: Tubulin beta-2A chain - Homo sapiens (Human)                                                                                                                  |
| 44463 | 4.17 | 0.32 | 0.0002 | 0.0117 | 2.85 | CK2c4                                                         | custom - CC chemokine                                                                                                                                                                                      |
| 45838 | 4.03 | 0.32 | 0.0003 | 0.0137 | 2.76 | all_v2.0.1344.0.C1                                            | non-directed                                                                                                                                                                                               |
| 44472 | 5.18 | 0.24 | 0.0000 | 0.0039 | 2.72 | 2AY614592_Gadus morhua CC chemokine type 3 mRNA, complete cds | custom - CC chemokine                                                                                                                                                                                      |
| 44586 | 3.73 | 0.32 | 0.0005 | 0.0186 | 2.71 | DXH1b                                                         | custom - probable ATP-dependent RNA helicase DHX                                                                                                                                                           |
| 43197 | 6.25 | 0.20 | 0.0000 | 0.0024 | 2.70 | all_v2.0.3448.C4                                              | VHSV-induced protein; n=1; Oncorhynchus mykiss Rep: VHSV-induced protein - Oncorhynchus mykiss (Rainbow trout) (Salmo gairdneri)                                                                           |
| 47156 | 3.43 | 0.42 | 0.0009 | 0.0261 | 2.69 | all_v2.0.617.C5                                               | Unassigned protein                                                                                                                                                                                         |
| 55231 | 5.53 | 0.22 | 0.0000 | 0.0033 | 2.65 | all_v2.0.8766.C1                                              | unclassified                                                                                                                                                                                               |
| 48764 | 6.36 | 0.19 | 0.0000 | 0.0023 | 2.65 | all_v2.0.3141.C3                                              | Unassigned protein                                                                                                                                                                                         |
| 47410 | 4.55 | 0.27 | 0.0001 | 0.0070 | 2.64 | sb_gmnlsfic_                                                  | Unassigned protein                                                                                                                                                                                         |

|       |      |      |        |        |      |                       |                                                                                                                                                                                                                                                                                                                                                                                                                                                                                              |
|-------|------|------|--------|--------|------|-----------------------|----------------------------------------------------------------------------------------------------------------------------------------------------------------------------------------------------------------------------------------------------------------------------------------------------------------------------------------------------------------------------------------------------------------------------------------------------------------------------------------------|
|       |      |      |        |        |      | 0004h02.t7            |                                                                                                                                                                                                                                                                                                                                                                                                                                                                                              |
|       |      |      |        |        |      | all_v2.0.3891         | Isoform 2 of Q5RI56 ; n=2; Danio rerio Rep:                                                                                                                                                                                                                                                                                                                                                                                                                                                  |
| 38670 | 5.02 | 0.27 | 0.0000 | 0.0044 | 2.64 | .C1                   | Isoform 2 of Q5RI56 - Danio rerio (Zebrafish) (Brachydanio rerio)                                                                                                                                                                                                                                                                                                                                                                                                                            |
| 44450 | 3.59 | 0.35 | 0.0007 | 0.0221 | 2.62 | CK2c6                 | custom - CC chemokine                                                                                                                                                                                                                                                                                                                                                                                                                                                                        |
|       |      |      |        |        |      | all_v2.0.7062         | Interferon stimulated gene 15; n=1; Gadus morhua Rep: Interferon stimulated gene 15 - Gadus morhua (Atlantic cod)                                                                                                                                                                                                                                                                                                                                                                            |
| 38607 | 6.76 | 0.17 | 0.0000 | 0.0019 | 2.61 | .C1                   |                                                                                                                                                                                                                                                                                                                                                                                                                                                                                              |
|       |      |      |        |        |      | all_v2.0.4370         | Phospholipase D4; n=3; Murinae Rep: Phospholipase D4 - Mus musculus (Mouse)                                                                                                                                                                                                                                                                                                                                                                                                                  |
| 39975 | 5.78 | 0.21 | 0.0000 | 0.0029 | 2.60 | .C3                   |                                                                                                                                                                                                                                                                                                                                                                                                                                                                                              |
|       |      |      |        |        |      | all_v2.0.2412         |                                                                                                                                                                                                                                                                                                                                                                                                                                                                                              |
| 46199 | 4.61 | 0.30 | 0.0001 | 0.0066 | 2.59 | .C1                   | SACS; saccin                                                                                                                                                                                                                                                                                                                                                                                                                                                                                 |
|       |      |      |        |        |      | all_v2.0.1500         | Zgc:92249; n=2; Danio rerio Rep: Zgc:92249 - Danio rerio (Zebrafish) (Brachydanio rerio)                                                                                                                                                                                                                                                                                                                                                                                                     |
| 44065 | 3.46 | 0.37 | 0.0009 | 0.0251 | 2.55 | 4.C1                  |                                                                                                                                                                                                                                                                                                                                                                                                                                                                                              |
|       |      |      |        |        |      | sb_gmapov_019d14.pDN  | Hexb; hexosaminidase B [EC:3.2.1.52]; K01207 beta-N-acetylhexosaminidase                                                                                                                                                                                                                                                                                                                                                                                                                     |
| 44884 | 4.73 | 0.25 | 0.0001 | 0.0061 | 2.52 | RF2                   |                                                                                                                                                                                                                                                                                                                                                                                                                                                                                              |
|       |      |      |        |        |      | sb_gmnbmd_0010a21.pDN |                                                                                                                                                                                                                                                                                                                                                                                                                                                                                              |
| 46202 | 4.47 | 0.28 | 0.0001 | 0.0078 | 2.50 | Rm13r                 | Sacs_predicted; saccin (predicted)                                                                                                                                                                                                                                                                                                                                                                                                                                                           |
|       |      |      |        |        |      | sb_gmnbbr_0013m15.pDN |                                                                                                                                                                                                                                                                                                                                                                                                                                                                                              |
| 47613 | 3.56 | 0.37 | 0.0007 | 0.0228 | 2.48 | Rm13r                 | Unassigned protein                                                                                                                                                                                                                                                                                                                                                                                                                                                                           |
|       |      |      |        |        |      | all_v2.0.2975         | Zgc:103420; n=3; Cyprinidae Rep: Zgc:103420 - Danio rerio (Zebrafish) (Brachydanio rerio)                                                                                                                                                                                                                                                                                                                                                                                                    |
| 43361 | 6.80 | 0.17 | 0.0000 | 0.0019 | 2.46 | .C2                   |                                                                                                                                                                                                                                                                                                                                                                                                                                                                                              |
|       |      |      |        |        |      | all_v2.0.4.C2         |                                                                                                                                                                                                                                                                                                                                                                                                                                                                                              |
| 46576 | 6.47 | 0.18 | 0.0000 | 0.0022 | 2.46 | 13                    | Unassigned protein                                                                                                                                                                                                                                                                                                                                                                                                                                                                           |
|       |      |      |        |        |      | all_v2.0.8751         | Heat shock 10kD protein 1; n=3; Danio rerio Rep: Heat shock 10kD protein 1 - Danio rerio (Zebrafish) (Brachydanio rerio)                                                                                                                                                                                                                                                                                                                                                                     |
| 37542 | 5.84 | 0.19 | 0.0000 | 0.0028 | 2.45 | .C1                   |                                                                                                                                                                                                                                                                                                                                                                                                                                                                                              |
|       |      |      |        |        |      | all_v2.0.1705         | Igsf2_predicted; immunoglobulin superfamily, member 2 (predicted); K06522 immunoglobulin superfamily, member 2/3/2008                                                                                                                                                                                                                                                                                                                                                                        |
| 44919 | 4.25 | 0.29 | 0.0002 | 0.0107 | 2.43 | 1.C1                  |                                                                                                                                                                                                                                                                                                                                                                                                                                                                                              |
|       |      |      |        |        |      | all_v2.0.3508         | Mitochondrial import inner membrane translocase subunit Tim13.; n=1; Takifugu rubripes Rep: Mitochondrial import inner membrane translocase subunit Tim13. - Takifugu rubripes                                                                                                                                                                                                                                                                                                               |
| 39108 | 6.98 | 0.15 | 0.0000 | 0.0018 | 2.37 | .C1                   |                                                                                                                                                                                                                                                                                                                                                                                                                                                                                              |
|       |      |      |        |        |      | sb_gmapht_0009a19.pDN | Calr protein; n=5; Danio rerio Rep: Calr protein - Brachydanio rerio (Zebrafish) (Danio rerio)                                                                                                                                                                                                                                                                                                                                                                                               |
| 36277 | 4.16 | 0.28 | 0.0002 | 0.0119 | 2.37 | RF2                   |                                                                                                                                                                                                                                                                                                                                                                                                                                                                                              |
|       |      |      |        |        |      | all_v2.0.4119         | PREDICTED: similar to Poly [ADP-ribose] polymerase 14 (PARP-14) (B aggressive lymphoma protein 2); n=1; Danio rerio Rep: PREDICTED: similar to Poly [ADP-ribose] polymerase 14 (PARP-14) (B aggressive lymphoma protein 2) - Danio rerio                                                                                                                                                                                                                                                     |
| 40846 | 5.14 | 0.21 | 0.0000 | 0.0039 | 2.36 | .C1                   |                                                                                                                                                                                                                                                                                                                                                                                                                                                                                              |
|       |      |      |        |        |      | all_v2.0.2805         |                                                                                                                                                                                                                                                                                                                                                                                                                                                                                              |
| 44371 | 3.68 | 0.36 | 0.0005 | 0.0199 | 2.35 | .C1                   | caspc; caspase c                                                                                                                                                                                                                                                                                                                                                                                                                                                                             |
| 44458 | 4.15 | 0.28 | 0.0002 | 0.0119 | 2.35 | CK2c1                 | custom - CC chemokine                                                                                                                                                                                                                                                                                                                                                                                                                                                                        |
|       |      |      |        |        |      | all_v2.0.6888         | Thioredoxin; n=1; Ictalurus punctatus Rep: Thioredoxin - Ictalurus punctatus (Channel catfish)                                                                                                                                                                                                                                                                                                                                                                                               |
| 42545 | 4.57 | 0.23 | 0.0001 | 0.0069 | 2.35 | .C1                   |                                                                                                                                                                                                                                                                                                                                                                                                                                                                                              |
|       |      |      |        |        |      | all_v2.0.9147         | Proteasome activator complex subunit 1 (Proteasome activator 28-alpha subunit) (PA28alpha) (PA28a) (Activator of multicatalytic protease subunit 1) (11S regulator complex subunit alpha) (REG-alpha) (Interferon gamma up-regulated I-5111 protein) (IGUP I-51; n=1; Takifugu rubripes Rep: Proteasome activator complex subunit 1 (Proteasome activator 28-alpha subunit) (PA28alpha) (PA28a) (Activator of multicatalytic protease subunit 1) (11S regulator complex subunit alpha) (REG- |
| 41407 | 6.04 | 0.16 | 0.0000 | 0.0026 | 2.29 | .C1                   |                                                                                                                                                                                                                                                                                                                                                                                                                                                                                              |

|       |      |      |        |        |      |                                                                                  |                                                                                                                                                                                                                                                    |
|-------|------|------|--------|--------|------|----------------------------------------------------------------------------------|----------------------------------------------------------------------------------------------------------------------------------------------------------------------------------------------------------------------------------------------------|
|       |      |      |        |        |      |                                                                                  | alpha) (Interferon gamma up-regulated I-5111 protein) (IGUP I-51 - Takifugu rubripes                                                                                                                                                               |
|       |      |      |        |        |      | 2AY614590_<br>Gadus<br>morhua CC<br>chemokine<br>type 1<br>mRNA,<br>complete cds | custom - CC chemokine                                                                                                                                                                                                                              |
| 44461 | 4.76 | 0.21 | 0.0001 | 0.0057 | 2.26 |                                                                                  | Gadd45al protein; n=2; Danio rerio Rep: Gadd45al protein - Danio rerio (Zebrafish) (Brachydanio rerio)                                                                                                                                             |
| 37299 | 5.65 | 0.18 | 0.0000 | 0.0031 | 2.25 | all_v2.0.3679<br>.C1                                                             |                                                                                                                                                                                                                                                    |
| 46563 | 4.30 | 0.24 | 0.0002 | 0.0104 | 2.23 | sb_gmnlskic_0009n01.pDN<br>Rm13r                                                 | Unassigned protein                                                                                                                                                                                                                                 |
| 45600 | 3.48 | 0.34 | 0.0008 | 0.0250 | 2.21 | all_v2.0.5490<br>.C1.a                                                           | non-directed                                                                                                                                                                                                                                       |
| 41565 | 7.23 | 0.13 | 0.0000 | 0.0017 | 2.19 | sb_gmbhkc_0002c04.pD<br>NRF2                                                     | Protein-tyrosine sulfotransferase 1; n=2; Danio rerio Rep: Protein-tyrosine sulfotransferase 1 - Brachydanio rerio (Zebrafish) (Danio rerio)                                                                                                       |
| 36805 | 3.99 | 0.24 | 0.0003 | 0.0145 | 2.18 | sb_gmnlpfc_0002o09.t7                                                            | DCMP deaminase; n=1; Danio rerio Rep: DCMP deaminase - Danio rerio (Zebrafish) (Brachydanio rerio)                                                                                                                                                 |
| 39326 | 4.18 | 0.23 | 0.0002 | 0.0117 | 2.14 | all_v2.0.9595<br>.C1                                                             | NFX1-type zinc finger-containing protein 1.; n=1; Takifugu rubripes Rep: NFX1-type zinc finger-containing protein 1 - Takifugu rubripes                                                                                                            |
| 49270 | 4.10 | 0.26 | 0.0002 | 0.0126 | 2.13 | all_v2.0.1047<br>0.C1                                                            | unclassified                                                                                                                                                                                                                                       |
| 40543 | 3.54 | 0.29 | 0.0007 | 0.0232 | 2.13 | all_v2.0.1220<br>.C1                                                             | PREDICTED: similar to hCG28999.; n=1; Monodelphis domestica Rep: PREDICTED: similar to hCG28999, - Monodelphis domestica                                                                                                                           |
| 44598 | 4.70 | 0.21 | 0.0001 | 0.0062 | 2.12 | STAT14<br>sb_gmbmd_0010h13.pDN<br>Rm13r                                          | custom - Signal transducer and activator of transcription 1                                                                                                                                                                                        |
| 46276 | 5.20 | 0.18 | 0.0000 | 0.0038 | 2.11 | sb_gmapht_0014i15.pDNR<br>F2                                                     | SMC_N domain containing protein Bloodthirsty; n=2; Notothenioidei Rep: Bloodthirsty - Chaenocephalus aceratus (White crocodile fish)                                                                                                               |
| 36190 | 4.63 | 0.19 | 0.0001 | 0.0065 | 2.11 | all_v2.0.3549<br>.C1                                                             |                                                                                                                                                                                                                                                    |
| 54777 | 4.93 | 0.20 | 0.0000 | 0.0050 | 2.10 |                                                                                  | unclassified                                                                                                                                                                                                                                       |
| 40235 | 3.65 | 0.28 | 0.0006 | 0.0208 | 2.09 | sb_gmnlkfc_0003i10.t7<br>all_v2.0.5297<br>.C2                                    | PREDICTED: similar to ATPase, aminophospholipid transporter-like, Class I, type 8A, member 2; n=1; Monodelphis domestica Rep: PREDICTED: similar to ATPase, aminophospholipid transporter-like, Class I, type 8A, member 2 - Monodelphis domestica |
| 54933 | 4.71 | 0.19 | 0.0001 | 0.0062 | 2.08 |                                                                                  | unclassified                                                                                                                                                                                                                                       |
| 38355 | 4.79 | 0.20 | 0.0001 | 0.0056 | 2.07 | all_v2.0.8243<br>.C2                                                             | Homolog of Homo sapiens Spastic ataxia of Charlevoix-Saguenay; n=1; Takifugu rubripes Rep: Homolog of Homo sapiens Spastic ataxia of Charlevoix-Saguenay - Takifugu rubripes                                                                       |
| 36612 | 3.82 | 0.24 | 0.0004 | 0.0171 | 2.07 | all_v2.0.1248<br>1.C1                                                            | Complement component C3; n=1; Paralichthys olivaceus Rep: Complement component C3 - Paralichthys olivaceus (Japanese flounder)                                                                                                                     |
| 45862 | 3.82 | 0.24 | 0.0004 | 0.0171 | 2.06 | all_v2.0.1657<br>6.C1                                                            | non-directed                                                                                                                                                                                                                                       |
| 47248 | 3.79 | 0.25 | 0.0004 | 0.0176 | 2.06 | all_v2.0.3503<br>.C1                                                             | Unassigned protein                                                                                                                                                                                                                                 |
| 38599 | 4.00 | 0.24 | 0.0003 | 0.0143 | 2.06 | all_v2.0.1614<br>5.C1                                                            | Interferon regulatory factor 10; n=7; Danio rerio Rep: Interferon regulatory factor 10 -                                                                                                                                                           |

|       |      |      |        |        |      |                        |                                                                                                                                                                                                                                                                                                             |
|-------|------|------|--------|--------|------|------------------------|-------------------------------------------------------------------------------------------------------------------------------------------------------------------------------------------------------------------------------------------------------------------------------------------------------------|
|       |      |      |        |        |      |                        | Danio rerio (Zebrafish) (Brachydanio rerio)                                                                                                                                                                                                                                                                 |
|       |      |      |        |        |      |                        | Proteasome subunit alpha type 6-like protein; n=1; Xenopsylla cheopis Rep: Proteasome subunit alpha type 6-like protein - Xenopsylla cheopis (oriental rat flea)                                                                                                                                            |
| 41414 | 3.52 | 0.30 | 0.0008 | 0.0240 | 2.05 | sb_gmnlsfic_0008p05.t7 |                                                                                                                                                                                                                                                                                                             |
| 44655 | 6.33 | 0.14 | 0.0000 | 0.0023 | 2.05 | all_v2.0.392.C1        | DMP1 domain containing protein Cardiac troponin T; n=14; Danio rerio Rep: Cardiac troponin T - Danio rerio (Zebrafish) (Brachydanio rerio)                                                                                                                                                                  |
| 36311 | 4.22 | 0.21 | 0.0002 | 0.0110 | 2.05 | all_v2.0.1220_6.C1     | Phospholipase D4 (EC 3.1.4.4) (PLD 4) (Choline phosphatase 4) (Phosphatidylcholine-hydrolyzing phospholipase D4).; n=1; Takifugu rubripes Rep: Phospholipase D4 (EC 3.1.4.4) (PLD 4) (Choline phosphatase 4) (Phosphatidylcholine-hydrolyzing phospholipase D4). - Takifugu rubripes                        |
| 39974 | 6.90 | 0.12 | 0.0000 | 0.0019 | 2.05 | all_v2.0.1628_3.C1     |                                                                                                                                                                                                                                                                                                             |
| 51332 | 5.46 | 0.16 | 0.0000 | 0.0034 | 2.04 | all_v2.0.4629.C1       | unclassified                                                                                                                                                                                                                                                                                                |
| 46887 | 3.79 | 0.24 | 0.0004 | 0.0176 | 2.02 | sb_gmnbpic_0013o02.pD  |                                                                                                                                                                                                                                                                                                             |
|       |      |      |        |        |      | NRF2                   | Unassigned protein VHSV-induced protein; n=1; Oncorhynchus mykiss Rep: VHSV-induced protein - Oncorhynchus mykiss (Rainbow trout) (Salmo gairdneri)                                                                                                                                                         |
| 43196 | 3.65 | 0.27 | 0.0006 | 0.0208 | 2.02 | all_v2.0.3448_C3       | Homolog of Carassius auratus Interferon-inducible protein Gig2.; n=4; Takifugu rubripes Rep: Homolog of Carassius auratus Interferon-inducible protein Gig2. - Takifugu rubripes                                                                                                                            |
| 37853 | 4.39 | 0.19 | 0.0001 | 0.0090 | 2.01 | all_v2.0.7494.C1       | Proteasome subunit alpha type-2; n=3; Xenopus Rep: Proteasome subunit alpha type-2 - Xenopus laevis (African clawed frog)                                                                                                                                                                                   |
| 41421 | 3.97 | 0.22 | 0.0003 | 0.0148 | 2.00 | all_v2.0.1046.C1       | NFX1-type zinc finger-containing protein 1.; n=1; Takifugu rubripes Rep: NFX1-type zinc finger-containing protein 1 - Takifugu rubripes                                                                                                                                                                     |
| 39325 | 5.07 | 0.17 | 0.0000 | 0.0042 | 1.99 | all_v2.0.9595_C2       |                                                                                                                                                                                                                                                                                                             |
| 46586 | 5.73 | 0.15 | 0.0000 | 0.0031 | 1.99 | sb_gmnlem_0013j07.sp6  | Unassigned protein                                                                                                                                                                                                                                                                                          |
| 52110 | 3.42 | 0.24 | 0.0009 | 0.0262 | 1.98 | all_v2.0.8876.C1       | unclassified Myomesin-2 (M-protein) (165 kDa titin-associated protein) (165 kDa connectin-associated protein).; n=1; Takifugu rubripes Rep: Myomesin-2 (M-protein) (165 kDa titin-associated protein) (165 kDa connectin-associated protein). - Takifugu rubripes                                           |
| 39204 | 4.09 | 0.21 | 0.0002 | 0.0127 | 1.97 | sb_gmnlmfta_0003i11.t7 |                                                                                                                                                                                                                                                                                                             |
| 55194 | 3.64 | 0.24 | 0.0006 | 0.0208 | 1.97 | all_v2.0.9305.C1       | unclassified                                                                                                                                                                                                                                                                                                |
| 50215 | 3.89 | 0.21 | 0.0003 | 0.0161 | 1.96 | all_v2.0.5974.C1       | unclassified                                                                                                                                                                                                                                                                                                |
| 53370 | 3.85 | 0.23 | 0.0004 | 0.0170 | 1.96 | all_v2.0.1155_7.C2     | unclassified                                                                                                                                                                                                                                                                                                |
| 52791 | 3.79 | 0.22 | 0.0004 | 0.0176 | 1.95 | all_v2.0.2818.C1       | unclassified                                                                                                                                                                                                                                                                                                |
| 42908 | 3.99 | 0.20 | 0.0003 | 0.0145 | 1.95 | all_v2.0.2624_C2       | Ubiquitin carrier protein; n=1; Tetrahymena thermophila SB210 Rep: Ubiquitin carrier protein - Tetrahymena thermophila SB210 PREDICTED: similar to tubby super-family protein isoform 2; n=2; Monodelphis domestica Rep: PREDICTED: similar to tubby super-family protein isoform 2 - Monodelphis domestica |
| 41164 | 3.94 | 0.20 | 0.0003 | 0.0151 | 1.94 | sb_gmnbspic_0006i05.pD |                                                                                                                                                                                                                                                                                                             |
|       |      |      |        |        |      | NRm13r                 | Transmembrane protein 7; n=1; Siniperca chuatsi Rep: Transmembrane protein 7 -                                                                                                                                                                                                                              |
| 42748 | 5.15 | 0.16 | 0.0000 | 0.0039 | 1.94 | all_v2.0.9596.C1       |                                                                                                                                                                                                                                                                                                             |

|       |      |      |        |        |      |                         |                                                                                                                                                                                                                                                                                                         |
|-------|------|------|--------|--------|------|-------------------------|---------------------------------------------------------------------------------------------------------------------------------------------------------------------------------------------------------------------------------------------------------------------------------------------------------|
|       |      |      |        |        |      |                         | Siniperca chuatsi (Chinese perch)                                                                                                                                                                                                                                                                       |
|       |      |      |        |        |      |                         | Dual specificity protein phosphatase 21 (EC 3.1.3.48) (EC 3.1.3.16) (Low molecular weight dual specificity phosphatase 21); n=1; Takifugu rubripes Rep: Dual specificity protein phosphatase 21 (EC 3.1.3.48) (EC 3.1.3.16) (Low molecular weight dual specificity phosphatase 21). - Takifugu rubripes |
| 36949 | 3.60 | 0.23 | 0.0006 | 0.0217 | 1.93 | all_v2.0.3352.C2        | K14 protein; n=1; Xenopus laevis Rep: K14 protein - Xenopus laevis (African clawed frog)                                                                                                                                                                                                                |
| 38695 | 3.84 | 0.21 | 0.0004 | 0.0170 | 1.92 | all_v2.0.7632.C1        |                                                                                                                                                                                                                                                                                                         |
| 47576 | 3.73 | 0.21 | 0.0005 | 0.0186 | 1.91 | sb_gmnbspic_0005b23.pD  |                                                                                                                                                                                                                                                                                                         |
|       |      |      |        |        |      | NRF2                    | Unassigned protein                                                                                                                                                                                                                                                                                      |
|       |      |      |        |        |      |                         | Homolog of Brachydanio rerio                                                                                                                                                                                                                                                                            |
|       |      |      |        |        |      |                         | Phosphoribosyl pyrophosphate synthetase-associated protein 2.; n=1; Takifugu rubripes Rep: Homolog of Brachydanio rerio                                                                                                                                                                                 |
| 37762 | 3.47 | 0.25 | 0.0009 | 0.0250 | 1.91 | sb_gmapov_0003k05.pDN   | Phosphoribosyl pyrophosphate synthetase-associated protein 2 - Takifugu rubripes                                                                                                                                                                                                                        |
|       |      |      |        |        |      | Rm13r                   | Homolog of Homo sapiens Chloride intracellular channel protein 4; n=1; Takifugu rubripes Rep: Homolog of Homo sapiens Chloride intracellular channel protein 4 - Takifugu rubripes                                                                                                                      |
| 38024 | 3.64 | 0.23 | 0.0006 | 0.0208 | 1.90 | sb_gmnlsfas_0004117.t7  | UPI000065EC34 related cluster; n=1; Takifugu rubripes Rep: UPI000065EC34                                                                                                                                                                                                                                |
|       |      |      |        |        |      | sb_gmapov_0013f18.pDNR  | UniRef100 entry - Takifugu rubripes                                                                                                                                                                                                                                                                     |
| 43007 | 3.65 | 0.23 | 0.0006 | 0.0208 | 1.90 | F2                      |                                                                                                                                                                                                                                                                                                         |
| 44546 | 5.07 | 0.15 | 0.0000 | 0.0042 | 1.86 | IRF1OK4                 | custom - Interferon regulatory factor 10K CCAAT/enhancer binding protein alpha; n=1; Oncorhynchus mykiss Rep: CCAAT/enhancer binding protein alpha - Oncorhynchus mykiss (Rainbow trout) (Salmo gairdneri)                                                                                              |
|       |      |      |        |        |      | sb_gmnblits_0034k09.pDN | Proteasome subunit alpha type-6; n=12; Tetrapoda Rep: Proteasome subunit alpha type-6 - Mus musculus (Mouse)                                                                                                                                                                                            |
| 36388 | 3.75 | 0.21 | 0.0005 | 0.0182 | 1.86 | RF2                     |                                                                                                                                                                                                                                                                                                         |
|       |      |      |        |        |      | all_v2.0.1051_3.C1      |                                                                                                                                                                                                                                                                                                         |
| 41423 | 3.69 | 0.20 | 0.0005 | 0.0197 | 1.86 |                         | Unassigned protein                                                                                                                                                                                                                                                                                      |
| 48995 | 4.85 | 0.15 | 0.0001 | 0.0053 | 1.85 | sb_gmnl1a_0001p14.t7    |                                                                                                                                                                                                                                                                                                         |
|       |      |      |        |        |      | all_v2.0.1586_6.C1.a    | non-directed                                                                                                                                                                                                                                                                                            |
| 45719 | 3.47 | 0.22 | 0.0009 | 0.0250 | 1.84 |                         |                                                                                                                                                                                                                                                                                                         |
|       |      |      |        |        |      | all_v2.0.1144.C1        | unclassified                                                                                                                                                                                                                                                                                            |
| 51453 | 3.55 | 0.22 | 0.0007 | 0.0228 | 1.83 |                         |                                                                                                                                                                                                                                                                                                         |
|       |      |      |        |        |      | all_v2.0.5996.C2        | unclassified                                                                                                                                                                                                                                                                                            |
| 52606 | 3.70 | 0.22 | 0.0005 | 0.0194 | 1.82 |                         | Zgc:158393; n=3; Danio rerio Rep: Zgc:158393 - Danio rerio (Zebrafish) (Brachydanio rerio)                                                                                                                                                                                                              |
| 43746 | 3.59 | 0.23 | 0.0007 | 0.0221 | 1.81 | all_v2.0.4016.C1        |                                                                                                                                                                                                                                                                                                         |
|       |      |      |        |        |      | all_v2.0.1763_4.C1      | unclassified                                                                                                                                                                                                                                                                                            |
| 51914 | 6.24 | 0.11 | 0.0000 | 0.0024 | 1.81 |                         | Heat shock protein 90Ae.; n=1; Takifugu rubripes Rep: Heat shock protein 90Ae. - Takifugu rubripes                                                                                                                                                                                                      |
| 37566 | 7.67 | 0.08 | 0.0000 | 0.0016 | 1.80 | all_v2.0.2479.C1        | Reverse transcriptase-like protein; n=1; Paralichthys olivaceus Rep: Reverse transcriptase-like protein - Paralichthys olivaceus (Japanese flounder)                                                                                                                                                    |
|       |      |      |        |        |      | sb_gmnbhkic_0006h11.pD  | PREDICTED: similar to ATPase, H+ transporting, lysosomal V0 subunit a isoform 1 isoform 2; n=1; Canis familiaris Rep: PREDICTED: similar to ATPase, H+ transporting, lysosomal V0 subunit a isoform 1 isoform 2 - Canis familiaris                                                                      |
| 41810 | 4.71 | 0.15 | 0.0001 | 0.0062 | 1.80 | NRF2                    |                                                                                                                                                                                                                                                                                                         |
|       |      |      |        |        |      | sb_gmapov_0016j14.pDNR  |                                                                                                                                                                                                                                                                                                         |
| 40236 | 3.95 | 0.18 | 0.0003 | 0.0150 | 1.79 | F2                      |                                                                                                                                                                                                                                                                                                         |
|       |      |      |        |        |      | all_v2.0.5897.C3        | unclassified                                                                                                                                                                                                                                                                                            |
| 51382 | 3.62 | 0.20 | 0.0006 | 0.0214 | 1.79 |                         | Disabled homolog 2-interacting protein (DAB2-interacting protein) (DAB2 interaction protein) (ASK-interacting protein)                                                                                                                                                                                  |
| 36870 | 4.24 | 0.17 | 0.0002 | 0.0108 | 1.79 | all_v2.0.1570_2.C1      |                                                                                                                                                                                                                                                                                                         |

|       |      |      |        |        |      |                             |                                                                                                                                                                                                                                                                                                                                                                                                                                                                                                                                                                                         |
|-------|------|------|--------|--------|------|-----------------------------|-----------------------------------------------------------------------------------------------------------------------------------------------------------------------------------------------------------------------------------------------------------------------------------------------------------------------------------------------------------------------------------------------------------------------------------------------------------------------------------------------------------------------------------------------------------------------------------------|
|       |      |      |        |        |      |                             | 1).; n=1; Takifugu rubripes Rep: Disabled homolog 2-interacting protein (DAB2-interacting protein) (DAB2 interaction protein) (ASK-interacting protein 1). - Takifugu rubripes                                                                                                                                                                                                                                                                                                                                                                                                          |
| 54050 | 3.83 | 0.19 | 0.0004 | 0.0171 | 1.78 | all_v2.0.9224.C1            | unclassified                                                                                                                                                                                                                                                                                                                                                                                                                                                                                                                                                                            |
| 49763 | 3.65 | 0.20 | 0.0006 | 0.0208 | 1.78 | all_v2.0.7999.C1            | unclassified                                                                                                                                                                                                                                                                                                                                                                                                                                                                                                                                                                            |
| 36407 | 6.00 | 0.11 | 0.0000 | 0.0026 | 1.78 | all_v2.0.1864.C7            | CD9 protein; n=1; Oncorhynchus mykiss Rep: CD9 protein - Oncorhynchus mykiss (Rainbow trout) (Salmo gairdneri) Voltage-dependent N-type calcium channel subunit alpha-1B (Voltage-gated calcium channel subunit alpha Cav2.2) (Calcium channel, L type, alpha-1 polypeptide isoform 5) (Brain calcium channel III) (BIII).; n=1; Takifugu rubripes Rep: Voltage-dependent N-type calcium channel subunit alpha-1B (Voltage-gated calcium channel subunit alpha Cav2.2) (Calcium channel, L type, alpha-1 polypeptide isoform 5) (Brain calcium channel III) (BIII). - Takifugu rubripes |
| 43221 | 4.03 | 0.17 | 0.0003 | 0.0137 | 1.78 | all_v2.0.1092.4.C1          | PREDICTED: similar to dynein, light chain, LC8-type 2; n=1; Ornithorhynchus anatinus Rep: PREDICTED: similar to dynein, light chain, LC8-type 2 - Ornithorhynchus anatinus                                                                                                                                                                                                                                                                                                                                                                                                              |
| 40416 | 6.16 | 0.10 | 0.0000 | 0.0025 | 1.76 | all_v2.0.2962.C1            | Homolog of Homo sapiens Spastic ataxia of Charlevoix-Saguenay; n=1; Takifugu rubripes Rep: Homolog of Homo sapiens Spastic ataxia of Charlevoix-Saguenay - Takifugu rubripes                                                                                                                                                                                                                                                                                                                                                                                                            |
| 38353 | 3.93 | 0.19 | 0.0003 | 0.0152 | 1.76 | all_v2.0.415.C2             |                                                                                                                                                                                                                                                                                                                                                                                                                                                                                                                                                                                         |
| 53852 | 3.97 | 0.19 | 0.0003 | 0.0148 | 1.76 | all_v2.0.6339.C1            | unclassified                                                                                                                                                                                                                                                                                                                                                                                                                                                                                                                                                                            |
| 41014 | 3.64 | 0.18 | 0.0006 | 0.0208 | 1.75 | all_v2.0.1415.8.C1          | PREDICTED: similar to Snf2-related CBP activator protein; n=1; Mus musculus Rep: PREDICTED: similar to Snf2-related CBP activator protein - Mus musculus                                                                                                                                                                                                                                                                                                                                                                                                                                |
| 37073 | 3.96 | 0.17 | 0.0003 | 0.0148 | 1.74 | sb_gmnbspic_0005b03.pD.NRF2 | EPST11 protein; n=3; Bos taurus Rep: EPST11 protein - Bos taurus (Bovine)                                                                                                                                                                                                                                                                                                                                                                                                                                                                                                               |
| 54000 | 3.40 | 0.21 | 0.0010 | 0.0270 | 1.73 | all_v2.0.7891.C1            | unclassified                                                                                                                                                                                                                                                                                                                                                                                                                                                                                                                                                                            |
| 41829 | 5.24 | 0.12 | 0.0000 | 0.0037 | 1.72 | sb_gmnblits_0018p08.pD.NRF2 | RFK protein; n=2; Bos taurus Rep: RFK protein - Bos taurus (Bovine)                                                                                                                                                                                                                                                                                                                                                                                                                                                                                                                     |
| 49538 | 3.57 | 0.18 | 0.0007 | 0.0223 | 1.72 | all_v2.0.1744.1.C1          | unclassified                                                                                                                                                                                                                                                                                                                                                                                                                                                                                                                                                                            |
| 36186 | 4.44 | 0.14 | 0.0001 | 0.0082 | 1.70 | all_v2.0.661.C2             | Bloodthirsty; n=2; Notothenioidei Rep: Bloodthirsty - Chaenocephalus aceratus (White crocodile fish) Proteasome subunit alpha type; n=8; Euteleostomi Rep: Proteasome subunit alpha type - Danio rerio (Zebrafish) (Brachydanio rerio)                                                                                                                                                                                                                                                                                                                                                  |
| 41418 | 3.76 | 0.17 | 0.0005 | 0.0182 | 1.69 | all_v2.0.659.C1             |                                                                                                                                                                                                                                                                                                                                                                                                                                                                                                                                                                                         |
| 46324 | 3.58 | 0.17 | 0.0007 | 0.0222 | 1.69 | all_v2.0.1615.1.C1          | TFIIS domain containing protein AHA1, activator of heat shock protein ATPase homolog 1, like; n=2; Danio rerio Rep: AHA1, activator of heat shock protein ATPase homolog 1, like - Danio rerio (Zebrafish) (Brachydanio rerio)                                                                                                                                                                                                                                                                                                                                                          |
| 35828 | 4.80 | 0.13 | 0.0001 | 0.0056 | 1.68 | all_v2.0.1075.4.C1          | PREDICTED: similar to scavenger receptor cysteine-rich protein precursor, partial; n=1; Strongylocentrotus purpuratus Rep: PREDICTED: similar to scavenger receptor cysteine-rich protein precursor, partial - Strongylocentrotus purpuratus                                                                                                                                                                                                                                                                                                                                            |
| 40980 | 3.85 | 0.17 | 0.0004 | 0.0170 | 1.68 | sb_gmapov_0018g11.pD.NRF2   |                                                                                                                                                                                                                                                                                                                                                                                                                                                                                                                                                                                         |

|       |      |      |        |        |      |                              |                                                                                                                                                                                    |
|-------|------|------|--------|--------|------|------------------------------|------------------------------------------------------------------------------------------------------------------------------------------------------------------------------------|
| 48417 | 4.11 | 0.16 | 0.0002 | 0.0126 | 1.68 | sb_gmnbpcic_0009d03.pDNRm13r | Unassigned protein                                                                                                                                                                 |
| 51421 | 4.31 | 0.14 | 0.0001 | 0.0102 | 1.68 | all_v2.0.4626.C1             | unclassified<br>Homolog of Homo sapiens Cathepsin K precursor; n=1; Takifugu rubripes Rep: Homolog of Homo sapiens Cathepsin K precursor - Takifugu rubripes                       |
| 38014 | 4.63 | 0.13 | 0.0001 | 0.0065 | 1.66 | all_v2.0.16634.C1            | Cell division cycle 42; n=12; Coelomata Rep: Cell division cycle 42 - Danio rerio (Zebrafish) (Brachydanio rerio)                                                                  |
| 36426 | 4.10 | 0.14 | 0.0002 | 0.0126 | 1.66 | all_v2.0.8306.C2             | Homolog of Homo sapiens Vacuolar sorting protein 54 long isoform; n=1; Takifugu rubripes Rep: Homolog of Homo sapiens Vacuolar sorting protein 54 long isoform - Takifugu rubripes |
| 38436 | 4.25 | 0.14 | 0.0002 | 0.0107 | 1.66 | sb_gmapov_0005h22.pDNRm13r   | Chaperonin containing TCP1, subunit 5; n=4; Clupeocephala Rep: Chaperonin containing TCP1, subunit 5 - Danio rerio (Zebrafish) (Brachydanio rerio)                                 |
| 36468 | 4.63 | 0.13 | 0.0001 | 0.0066 | 1.66 | all_v2.0.495.C1              | RING finger protein 213.; n=1; Gallus gallus Rep: RING finger protein 213 - Gallus gallus                                                                                          |
| 41937 | 5.25 | 0.11 | 0.0000 | 0.0037 | 1.65 | all_v2.0.7491.C2             | Zgc:136346; n=7; Danio rerio Rep: Zgc:136346 - Brachydanio rerio (Zebrafish) (Danio rerio)                                                                                         |
| 43598 | 4.18 | 0.14 | 0.0002 | 0.0117 | 1.63 | sb_gmnbmu_0001b07.pDNRm13r   | KRAS, LOC418207; v-Ki-ras2 Kirsten rat sarcoma viral oncogene homolog; K07827                                                                                                      |
| 44956 | 3.54 | 0.17 | 0.0007 | 0.0232 | 1.63 | all_v2.0.18221.C1            | GTPase Kras<br>Annexin 4; n=3; Clupeocephala Rep: Annexin 4 - Danio rerio (Zebrafish) (Brachydanio rerio)                                                                          |
| 35923 | 5.86 | 0.09 | 0.0000 | 0.0027 | 1.62 | all_v2.0.4393.C1             | Homolog of Homo sapiens Mucin 2 precursor; n=1; Takifugu rubripes Rep: Homolog of Homo sapiens Mucin 2 precursor - Takifugu rubripes                                               |
| 38178 | 4.67 | 0.12 | 0.0001 | 0.0062 | 1.62 | all_v2.0.14775.C1            | unclassified                                                                                                                                                                       |
| 51542 | 3.48 | 0.17 | 0.0008 | 0.0250 | 1.61 | all_v2.0.6459.C1             | Unassigned protein                                                                                                                                                                 |
| 48638 | 3.50 | 0.18 | 0.0008 | 0.0243 | 1.61 | all_v2.0.8600.C1             | Scavenger receptor class B type I; n=2; Salmonidae Rep: Scavenger receptor class B type I - Salmo salar (Atlantic salmon)                                                          |
| 42017 | 4.22 | 0.13 | 0.0002 | 0.0110 | 1.60 | sb_gmapov_0005b18.pDNRm13r   | Apolipoprotein A-IV4; n=3; Takifugu rubripes Rep: Apolipoprotein A-IV4 - Fugu rubripes (Japanese pufferfish) (Takifugu rubripes)                                                   |
| 35957 | 3.47 | 0.17 | 0.0009 | 0.0250 | 1.60 | all_v2.0.15919.C1            | IgD mRNA for immunoglobulin D; n=1; Takifugu rubripes Rep: IgD mRNA for immunoglobulin D - Takifugu rubripes                                                                       |
| 38545 | 3.55 | 0.16 | 0.0007 | 0.0230 | 1.60 | all_v2.0.2319.C2             | Bloodthirsty; n=2; Notothenioidei Rep: Bloodthirsty - Chaenocephalus aceratus (White crocodile fish)                                                                               |
| 36185 | 4.69 | 0.11 | 0.0001 | 0.0062 | 1.59 | all_v2.0.661.C20             | Proteasome (Prosome, macropain) subunit, beta type, 2; n=2; Otophysi Rep: Proteasome (Prosome, macropain) subunit, beta type, 2 - Danio rerio (Zebrafish) (Brachydanio rerio)      |
| 41404 | 3.87 | 0.14 | 0.0004 | 0.0165 | 1.59 | all_v2.0.17673.C1            | Unassigned protein                                                                                                                                                                 |
| 46893 | 4.08 | 0.13 | 0.0002 | 0.0128 | 1.59 | all_v2.0.7095.C1             | PREDICTED: Gallus gallus similar to Vasohibin (LOC423369), mRNA.; n=1; Gallus gallus Rep: PREDICTED: Gallus gallus similar to Vasohibin (LOC423369), mRNA. - Gallus gallus         |
| 40136 | 4.98 | 0.11 | 0.0000 | 0.0047 | 1.59 | sb_gmapov_0004f15.pDNRm13r   | PREDICTED: similar to transposase; n=1; Danio rerio Rep: PREDICTED: similar to transposase - Danio rerio                                                                           |
| 41109 | 3.46 | 0.17 | 0.0009 | 0.0253 | 1.59 | sb_gmnbmd_0005c12.pDNRm13r   | Cytochrome c oxidase subunit VIa                                                                                                                                                   |
| 36757 | 4.50 | 0.12 | 0.0001 | 0.0074 | 1.58 | all_v2.0.1015                |                                                                                                                                                                                    |

|       |      |      |        |        |      |                            |                                                                                                                                                                                    |
|-------|------|------|--------|--------|------|----------------------------|------------------------------------------------------------------------------------------------------------------------------------------------------------------------------------|
|       |      |      |        |        |      | .C1                        | polypeptide 1; n=2; Danio rerio Rep: Cytochrome c oxidase subunit VIa polypeptide 1 - Danio rerio (Zebrafish) (Brachydanio rerio)                                                  |
| 42555 | 3.91 | 0.14 | 0.0003 | 0.0157 | 1.58 | sb_gmlbgits_0003f16.sp6    | Tho2; n=5; Danio rerio Rep: Tho2 - Danio rerio (Zebrafish) (Brachydanio rerio)                                                                                                     |
| 36016 | 3.82 | 0.15 | 0.0004 | 0.0171 | 1.58 | all_v2.0.7212.C1           | ATP synthase coupling factor 6-like protein; n=1; Bufo gargarizans Rep: ATP synthase coupling factor 6-like protein - Bufo bufo gargarizans (Asian toad)                           |
| 41409 | 4.06 | 0.14 | 0.0002 | 0.0131 | 1.57 | all_v2.0.379.C1            | Proteasome activator subunit 2; n=3; Clupeocephala Rep: Proteasome activator subunit 2 - Danio rerio (Zebrafish) (Brachydanio rerio)                                               |
| 36195 | 4.28 | 0.12 | 0.0002 | 0.0106 | 1.56 | sb_gmnlbfc_0007a23.t7      | Bloodthirsty; n=2; Notothenioides Rep: Bloodthirsty - Chaenocephalus aceratus (White crocodile fish)                                                                               |
| 55484 | 3.83 | 0.14 | 0.0004 | 0.0171 | 1.56 | sb_gmapov_019c03.pDN Rm13r | ywhaqa; tyrosine 3-monooxygenase/tryptophan 5-monooxygenase activation protein, theta polypeptide a; K06630 tyrosine 3-monooxygenase/tryptophan 5-monooxygenase activation protein |
| 42502 | 3.60 | 0.14 | 0.0006 | 0.0217 | 1.56 | all_v2.0.1760.5.C1         | T-complex protein 1, alpha subunit; n=6; Danio rerio Rep: T-complex protein 1, alpha subunit - Danio rerio (Zebrafish) (Brachydanio rerio)                                         |
| 36813 | 3.58 | 0.15 | 0.0007 | 0.0222 | 1.55 | sb_gmapte_0005h11.pDN RF2  | DEAD (Asp-Glu-Ala-Asp) box polypeptide 23; n=9; Euteleostomi Rep: DEAD (Asp-Glu-Ala-Asp) box polypeptide 23 - Danio rerio (Zebrafish) (Brachydanio rerio)                          |
| 51062 | 4.81 | 0.10 | 0.0001 | 0.0055 | 1.55 | all_v2.0.8508.C1           | unclassified                                                                                                                                                                       |
| 50754 | 3.63 | 0.14 | 0.0006 | 0.0212 | 1.53 | all_v2.0.5172.C1           | unclassified                                                                                                                                                                       |
| 48810 | 4.08 | 0.12 | 0.0002 | 0.0128 | 1.53 | all_v2.0.7149.C2           | Unassigned protein                                                                                                                                                                 |
| 38910 | 4.02 | 0.12 | 0.0003 | 0.0138 | 1.53 | all_v2.0.1628.6.C1         | Male-specific protein; n=1; Sarotherodon galilaeus Rep: Male-specific protein - Sarotherodon galilaeus (mango tilapia)                                                             |
| 39798 | 3.49 | 0.15 | 0.0008 | 0.0247 | 1.53 | all_v2.0.8253.C1           | Opioid growth factor receptor; n=2; Salmo salar Rep: Opioid growth factor receptor - Salmo salar (Atlantic salmon)                                                                 |
| 53714 | 3.41 | 0.15 | 0.0010 | 0.0265 | 1.53 | all_v2.0.3972.C1           | unclassified                                                                                                                                                                       |
| 40508 | 3.83 | 0.13 | 0.0004 | 0.0171 | 1.53 | all_v2.0.5811.C1           | PREDICTED: similar to glutathione S-transferase mu isoform 1; n=1; Danio rerio Rep: PREDICTED: similar to glutathione S-transferase mu isoform 1 - Danio rerio                     |
| 45010 | 5.94 | 0.07 | 0.0000 | 0.0027 | 1.52 | all_v2.0.4885.C1           | LOC100017761; similar to 90-kDa heat shock protein                                                                                                                                 |
| 50881 | 3.53 | 0.15 | 0.0007 | 0.0232 | 1.52 | all_v2.0.324.C1            | unclassified                                                                                                                                                                       |
| 39626 | 3.70 | 0.14 | 0.0005 | 0.0194 | 1.52 | all_v2.0.4.CB27            | Novel protein; n=2; Danio rerio Rep: Novel protein - Danio rerio (Zebrafish) (Brachydanio rerio)                                                                                   |
| 44865 | 3.82 | 0.13 | 0.0004 | 0.0171 | 1.52 | all_v2.0.8362.C1           | HERC5, LOC478474; hect domain and RLD5                                                                                                                                             |
| 44008 | 3.48 | 0.14 | 0.0008 | 0.0249 | 1.52 | all_v2.0.3117.C1           | Zgc:86833; n=3; Clupeocephala Rep: Zgc:86833 - Danio rerio (Zebrafish) (Brachydanio rerio)                                                                                         |
| 51353 | 3.70 | 0.13 | 0.0005 | 0.0194 | 1.51 | all_v2.0.1089.8.C1         | unclassified                                                                                                                                                                       |
| 36922 | 3.54 | 0.13 | 0.0007 | 0.0232 | 1.51 | all_v2.0.5225.C1           | DnaJ-like subfamily A member 4; n=1; Paralichthys olivaceus Rep: DnaJ-like subfamily A member 4 - Paralichthys olivaceus (Japanese flounder)                                       |
| 44759 | 5.42 | 0.08 | 0.0000 | 0.0034 | 1.50 | sb_gmnblits_               | Dynein_light domain containing protein                                                                                                                                             |



|       |      |      |        |        |      |                                        |                                                                                                                                                                                                                 |
|-------|------|------|--------|--------|------|----------------------------------------|-----------------------------------------------------------------------------------------------------------------------------------------------------------------------------------------------------------------|
|       |      |      |        |        |      | 0002117.pDN<br>RF2                     |                                                                                                                                                                                                                 |
| 48472 | 3.61 | 0.14 | 0.0006 | 0.0217 | 1.49 | all_v2.0.1880<br>0.C1                  | Unassigned protein                                                                                                                                                                                              |
| 51340 | 3.69 | 0.12 | 0.0005 | 0.0197 | 1.48 | all_v2.0.1299<br>5.C1                  | unclassified                                                                                                                                                                                                    |
| 44545 | 4.29 | 0.10 | 0.0002 | 0.0105 | 1.48 | IRF1OK3<br>sb_gmnlskic_<br>0011d03.pDN | custom - Interferon regulatory factor 10K<br>Transcription factor; n=8;<br>Clupeocephala Rep: Transcription factor -<br>Danio rerio (Zebrafish) (Brachydanio rerio)                                             |
| 42664 | 4.53 | 0.10 | 0.0001 | 0.0072 | 1.48 | Rm13r<br>all_v2.0.4526<br>.C3          | Unassigned protein                                                                                                                                                                                              |
| 46456 | 3.77 | 0.12 | 0.0004 | 0.0178 | 1.48 | sb_gmnlla_00<br>34i05.t7               | Unassigned protein                                                                                                                                                                                              |
| 49041 | 3.53 | 0.14 | 0.0008 | 0.0232 | 1.48 | all_v2.0.8649<br>.C1                   | HRAS-like suppressor 3; n=1; Perca<br>flavescens Rep: HRAS-like suppressor 3 -<br>Perca flavescens (Yellow perch)                                                                                               |
| 38512 | 3.45 | 0.12 | 0.0009 | 0.0254 | 1.47 | sb_gmnlpras_<br>0001f12.t7             | Ubiquitin; n=6; Eukaryota Rep: Ubiquitin -<br>Tetrahymena pyriformis                                                                                                                                            |
| 42922 | 4.60 | 0.09 | 0.0001 | 0.0068 | 1.47 | all_v2.0.1785<br>2.C1                  | Unassigned protein                                                                                                                                                                                              |
| 49027 | 3.72 | 0.12 | 0.0005 | 0.0190 | 1.46 | sb_gmlbgits_<br>0001h03.t7             | Unassigned protein                                                                                                                                                                                              |
| 48587 | 3.80 | 0.12 | 0.0004 | 0.0175 | 1.46 | sb_gmapht_0<br>004g05.pDN              | UPI0000E4E275 related cluster; n=1; Danio<br>rerio Rep: UPI0000E4E275 UniRef100 entry<br>- Danio rerio                                                                                                          |
| 43079 | 4.61 | 0.09 | 0.0001 | 0.0066 | 1.46 | RF2                                    | PREDICTED: similar to bloodthirsty; n=3;<br>Danio rerio Rep: PREDICTED: similar to<br>bloodthirsty - Danio rerio                                                                                                |
| 40263 | 3.78 | 0.11 | 0.0004 | 0.0178 | 1.46 | all_v2.0.661.<br>C24                   | Unassigned protein                                                                                                                                                                                              |
| 48510 | 3.81 | 0.11 | 0.0004 | 0.0173 | 1.46 | sb_gmnlla_00<br>35h19.t7               | Out at first protein homolog precursor; n=1;<br>Gallus gallus Rep: Out at first protein<br>homolog precursor - Gallus gallus (Chicken)                                                                          |
| 39825 | 3.98 | 0.10 | 0.0003 | 0.0147 | 1.45 | sb_gmnlsras_<br>0002k15.t7             | unclassified                                                                                                                                                                                                    |
| 52660 | 3.68 | 0.11 | 0.0005 | 0.0198 | 1.45 | all_v2.0.1402<br>3.C1                  | unclassified                                                                                                                                                                                                    |
| 51485 | 3.50 | 0.13 | 0.0008 | 0.0243 | 1.44 | all_v2.0.1670<br>7.C1                  | unclassified                                                                                                                                                                                                    |
| 45725 | 3.82 | 0.11 | 0.0004 | 0.0171 | 1.43 | all_v2.0.1573<br>9.C1.a                | non-directed                                                                                                                                                                                                    |
| 45026 | 3.70 | 0.11 | 0.0005 | 0.0194 | 1.43 | sb_gmnlsras_<br>0003k15.t7             | LOC100030284; similar to asteroid homolog<br>1<br>Proteasome subunit beta type; n=5;<br>Salmonidae Rep: Proteasome subunit beta<br>type - Salmo salar (Atlantic salmon)                                         |
| 41431 | 5.15 | 0.07 | 0.0000 | 0.0039 | 1.43 | all_v2.0.1573<br>4.C1                  | Warm temperature acclimation-related 65<br>kDa protein; n=1; Dicentrarchus labrax Rep:<br>Warm temperature acclimation-related 65<br>kDa protein - Dicentrarchus labrax<br>(European sea bass)                  |
| 43222 | 3.95 | 0.10 | 0.0003 | 0.0149 | 1.42 | all_v2.0.1117<br>4.C1                  | Heat shock protein HSP 90-alpha; n=8;<br>Clupeocephala Rep: Heat shock protein HSP<br>90-alpha - Danio rerio (Zebrafish)<br>(Brachydanio rerio)                                                                 |
| 37573 | 3.91 | 0.10 | 0.0003 | 0.0157 | 1.42 | sb_gmnlkfta_<br>0003o06.t7             | NFX1-type zinc finger-containing protein 1.;<br>n=1; Takifugu rubripes Rep: NFX1-type zinc<br>finger-containing protein 1 - Takifugu<br>rubripes                                                                |
| 39321 | 4.02 | 0.10 | 0.0003 | 0.0138 | 1.42 | all_v2.0.6027<br>.C5                   | Tubulin alpha chain; n=36; Fungi/Metazoa<br>group Rep: Tubulin alpha chain - Octopus<br>dofleini (Giant octopus)                                                                                                |
| 42817 | 4.25 | 0.08 | 0.0002 | 0.0107 | 1.38 | Rm13r<br>sb_gmnlem_0<br>016n13.t7      | [K] COG1958 Small nuclear<br>ribonucleoprotein (snRNP) homolog<br>Heat shock protein HSP 90-beta; n=13;<br>Euteleostomi Rep: Heat shock protein HSP<br>90-beta - Danio rerio (Zebrafish)<br>(Brachydanio rerio) |
| 44207 | 3.96 | 0.09 | 0.0003 | 0.0148 | 1.37 | all_v2.0.1961<br>.C1                   | Homolog of Brachydanio rerio Novel ABC<br>transporter similar to human multidrug-                                                                                                                               |
| 37574 | 3.93 | 0.09 | 0.0003 | 0.0152 | 1.37 | sb_gmapov_0<br>020h11.pDN              |                                                                                                                                                                                                                 |
| 37745 | 3.49 | 0.10 | 0.0008 | 0.0245 | 1.36 |                                        |                                                                                                                                                                                                                 |

|       |       |      |        |        |      |                              |                                                                                                                                                                                                                                                                                        |
|-------|-------|------|--------|--------|------|------------------------------|----------------------------------------------------------------------------------------------------------------------------------------------------------------------------------------------------------------------------------------------------------------------------------------|
|       |       |      |        |        |      | RF2                          | resistance proteins (MRP).; n=1; Takifugu rubripes Rep: Homolog of Brachydanio rerio Novel ABC transporter similar to human multidrug-resistance proteins (MRP). - Takifugu rubripes                                                                                                   |
| 38765 | 3.56  | 0.10 | 0.0007 | 0.0226 | 1.36 | sb_gmnbpcic_0003i03.pDNRm13r | Leucine rich repeat containing 50; n=3; Danio rerio Rep: Leucine rich repeat containing 50 - Danio rerio (Zebrafish) (Brachydanio rerio)                                                                                                                                               |
| 44088 | 4.88  | 0.06 | 0.0001 | 0.0052 | 1.35 | all_v2.0.5218.C1             | Zgc:92655; n=1; Danio rerio Rep: Zgc:92655 - Danio rerio (Zebrafish) (Brachydanio rerio)                                                                                                                                                                                               |
| 39904 | 3.87  | 0.08 | 0.0004 | 0.0167 | 1.33 | all_v2.0.6912.C1             | Peptidyl-prolyl cis-trans isomerase; n=6; Danio rerio Rep: Peptidyl-prolyl cis-trans isomerase - Danio rerio (Zebrafish) (Brachydanio rerio)                                                                                                                                           |
| 36584 | 4.40  | 0.06 | 0.0001 | 0.0087 | 1.33 | all_v2.0.4715.C1             | Cold-inducible RNA-binding protein (Glycine-rich RNA-binding protein CIRP) (A18 hnRNP).; n=1; Takifugu rubripes Rep: Cold-inducible RNA-binding protein (Glycine-rich RNA-binding protein CIRP) (A18 hnRNP). - Takifugu rubripes                                                       |
| 37707 | 3.50  | 0.08 | 0.0008 | 0.0243 | 1.33 | sb_gmapov_0029c16.pDNRf2     | Homolog of Brachydanio rerio Fem1c.; n=1; Takifugu rubripes Rep: Homolog of Brachydanio rerio Fem1c. - Takifugu rubripes                                                                                                                                                               |
| 36265 | 4.81  | 0.06 | 0.0001 | 0.0055 | 1.33 | all_v2.0.234.C13             | Calmodulin; n=24; Eukaryota Rep: Calmodulin - Homo sapiens (Human)                                                                                                                                                                                                                     |
| 45467 | 5.06  | 0.05 | 0.0000 | 0.0042 | 1.32 | all_v2.0.1658.C1             | Myosin_tail_1 multi-domain protein SET domain-containing protein 8; n=2; Xenopus tropicalis Rep: SET domain-containing protein 8 - Xenopus tropicalis (Western clawed frog) (Silurana tropicalis)                                                                                      |
| 42133 | 3.45  | 0.08 | 0.0009 | 0.0253 | 1.31 | sb_gmapht_0014k02.pDNRf2     | ATP-binding cassette, sub-family F (GCN20), member 1; n=3; Clupeocephala Rep: ATP-binding cassette, sub-family F (GCN20), member 1 - Danio rerio (Zebrafish) (Brachydanio rerio)                                                                                                       |
| 36062 | 3.47  | 0.08 | 0.0009 | 0.0250 | 1.30 | all_v2.0.6364.C1             | ZNFX1; zinc finger, NFX1-type containing 1                                                                                                                                                                                                                                             |
| 55532 | 4.14  | 0.06 | 0.0002 | 0.0121 | 1.30 | all_v2.0.10346.C1            | ATP synthase gamma chain; n=4; Cyprinidae Rep: ATP synthase gamma chain - Danio rerio (Zebrafish) (Brachydanio rerio)                                                                                                                                                                  |
| 36019 | 3.47  | 0.08 | 0.0009 | 0.0250 | 1.30 | all_v2.0.2622.C1             | Homolog of Homo sapiens Proprotein convertase subtilisin/kexin type 5 precursor; n=1; Takifugu rubripes Rep: Homolog of Homo sapiens Proprotein convertase subtilisin/kexin type 5 precursor - Takifugu rubripes                                                                       |
| 38293 | 3.69  | 0.07 | 0.0005 | 0.0197 | 1.28 | all_v2.0.15532.C1            | LOC570025; similar to potassium channel tetramerisation domain containing 1                                                                                                                                                                                                            |
| 45192 | -5.72 | 0.07 | 0.0000 | 0.0031 | 0.68 | all_v2.0.13771.C1            | Novel protein similar to vertebrate ATPase, Ca <sup>++</sup> transporting, cardiac muscle, slow twitch 2; n=3; Danio rerio Rep: Novel protein similar to vertebrate ATPase, Ca <sup>++</sup> transporting, cardiac muscle, slow twitch 2 - Brachydanio rerio (Zebrafish) (Danio rerio) |
| 39452 | -5.51 | 0.15 | 0.0000 | 0.0033 | 0.51 | sb_gmapht_0021i12.pDNRm13r   |                                                                                                                                                                                                                                                                                        |
| 49079 | -6.24 | 0.13 | 0.0000 | 0.0024 | 0.51 | all_v2.0.8699.C1             | unclassified                                                                                                                                                                                                                                                                           |

<sup>a</sup>Fold-changes are presented as outputted by siggenes and were calculated as pic/PBS

Supplemental Table S6a. 29 genes differentially expressed between fish injected with PBS at 10°C and sampled at 6HPI compared to non-injected fish held at 10°C

| Probe ID | d-value | Stdev | Raw p  | q-value | Fold Change <sup>a</sup> | Sequence Name                          | Gene Name                                                                                                                                                                                                                                                                                                                                                                                                                                                                                                                                                   |
|----------|---------|-------|--------|---------|--------------------------|----------------------------------------|-------------------------------------------------------------------------------------------------------------------------------------------------------------------------------------------------------------------------------------------------------------------------------------------------------------------------------------------------------------------------------------------------------------------------------------------------------------------------------------------------------------------------------------------------------------|
| 49496    | 3.45    | 0.50  | 0.0001 | 0.043   | 5.36                     | all_v2.0.17<br>205.C1                  | unclassified                                                                                                                                                                                                                                                                                                                                                                                                                                                                                                                                                |
| 49256    | 3.62    | 0.75  | 0.0000 | 0.043   | 5.27                     | all_v2.0.87<br>61.C1                   | unclassified                                                                                                                                                                                                                                                                                                                                                                                                                                                                                                                                                |
| 43843    | 3.42    | 0.73  | 0.0001 | 0.043   | 4.47                     | sb_gmnbpc<br>ic_0011c15<br>.pDNRF2     | Zgc:55941; n=3; Danio rerio Rep: Zgc:55941 -<br>Danio rerio (Zebrafish) (Brachydanio rerio)                                                                                                                                                                                                                                                                                                                                                                                                                                                                 |
| 39583    | 3.36    | 0.70  | 0.0001 | 0.048   | 3.88                     | sb_gmnbhk<br>as_0002m1<br>9.pDNRF2     | Novel protein; n=2; Danio rerio Rep: Novel<br>protein - Brachydanio rerio (Zebrafish) (Danio<br>rerio)                                                                                                                                                                                                                                                                                                                                                                                                                                                      |
| 46438    | 3.51    | 0.34  | 0.0000 | 0.043   | 2.60                     | all_v2.0.15<br>803.C1                  | Unassigned protein                                                                                                                                                                                                                                                                                                                                                                                                                                                                                                                                          |
| 46031    | 3.06    | 0.35  | 0.0002 | 0.061   | 2.35                     | sb_gmnbspi<br>c_0004i16.<br>pDNRF2     | PREDICTED: similar to CG3168-PA, isoform<br>A [Tribolium castaneum]<br>Homolog of Homo sapiens N2B-Titin<br>Isoform.; n=1; Takifugu rubripes Rep:                                                                                                                                                                                                                                                                                                                                                                                                           |
| 38189    | 3.10    | 0.20  | 0.0002 | 0.057   | 1.93                     | all_v2.0.97<br>63.C1                   | Homolog of Homo sapiens N2B-Titin Isoform.<br>- Takifugu rubripes                                                                                                                                                                                                                                                                                                                                                                                                                                                                                           |
| 49988    | 3.13    | 0.21  | 0.0002 | 0.057   | 1.86                     | all_v2.0.90<br>43.C1                   | unclassified                                                                                                                                                                                                                                                                                                                                                                                                                                                                                                                                                |
| 36701    | 3.69    | 0.14  | 0.0000 | 0.043   | 1.79                     | all_v2.0.21<br>15.C1                   | C-X-C chemokine receptor type 4 (CXC-R4)<br>(CXCR-4) (Stromal cell- derived factor 1<br>receptor) (SDF-1 receptor) (Fusin) (Leukocyte-<br>derived seven transmembrane domain<br>receptor) (LESTR) (LCR1) (FB22) (NPYRL)<br>(HM89) (CD184 antigen).; n=1; Takifugu<br>rubripes Rep: C-X-C chemokine receptor type<br>4 (CXC-R4) (CXCR-4) (Stromal cell- derived<br>factor 1 receptor) (SDF-1 receptor) (Fusin)<br>(Leukocyte-derived seven transmembrane<br>domain receptor) (LESTR) (LCR1) (FB22)<br>(NPYRL) (HM89) (CD184 antigen). -<br>Takifugu rubripes |
| 45703    | 3.05    | 0.18  | 0.0002 | 0.061   | 1.77                     | all_v2.0.21<br>58.C2                   | non-directed<br>Zgc:103414; n=2; Danio rerio Rep:<br>Zgc:103414 - Danio rerio (Zebrafish)<br>(Brachydanio rerio)                                                                                                                                                                                                                                                                                                                                                                                                                                            |
| 43360    | 3.56    | 0.14  | 0.0000 | 0.043   | 1.73                     | all_v2.0.21<br>23.C1                   | non-directed                                                                                                                                                                                                                                                                                                                                                                                                                                                                                                                                                |
| 45561    | 3.07    | 0.16  | 0.0002 | 0.061   | 1.72                     | all_v2.0.20<br>6.C1                    | non-directed                                                                                                                                                                                                                                                                                                                                                                                                                                                                                                                                                |
| 55365    | 3.67    | 0.12  | 0.0000 | 0.043   | 1.71                     | all_v2.0.16<br>353.C1                  | unclassified                                                                                                                                                                                                                                                                                                                                                                                                                                                                                                                                                |
| 40998    | 3.21    | 0.15  | 0.0001 | 0.055   | 1.66                     | sb_gmapht<br>_0026m01.<br>pDNRM13r     | PREDICTED: similar to shugoshin-like 1<br>isoform A2; n=1; Danio rerio Rep:<br>PREDICTED: similar to shugoshin-like 1<br>isoform A2 - Danio rerio                                                                                                                                                                                                                                                                                                                                                                                                           |
| 47083    | 3.12    | 0.12  | 0.0002 | 0.057   | 1.55                     | sb_gmapht<br>_0017e09.p<br>DNRF2       | Unassigned protein                                                                                                                                                                                                                                                                                                                                                                                                                                                                                                                                          |
| 41731    | 3.11    | 0.08  | 0.0002 | 0.057   | 1.42                     | sb_gmnblit<br>s_0001b02.<br>pDNRF2     | Renin binding protein; n=2; Danio rerio Rep:<br>Renin binding protein - Brachydanio rerio<br>(Zebrafish) (Danio rerio)<br>Heat shock protein 90; n=13;                                                                                                                                                                                                                                                                                                                                                                                                      |
| 37564    | 3.17    | 0.06  | 0.0001 | 0.055   | 1.38                     | all_v2.0.16<br>020.C1                  | Euteleostomi Rep: Heat shock protein 90 -<br>Scophthalmus maximus (Turbot)<br>Homolog of Homo sapiens Ribonuclease P<br>40kDa subunit; n=1; Takifugu rubripes Rep:<br>Homolog of Homo sapiens Ribonuclease P<br>40kDa subunit - Takifugu rubripes                                                                                                                                                                                                                                                                                                           |
| 38314    | 3.42    | 0.04  | 0.0001 | 0.043   | 1.34                     | sb_gmapov<br>_0007116.p<br>DNRF2       | Unassigned protein                                                                                                                                                                                                                                                                                                                                                                                                                                                                                                                                          |
| 46638    | -3.17   | 0.13  | 0.0001 | 0.055   | 0.63                     | sb_gmnlla_<br>0011k07.t7<br>sb_gmnlsfa | Homolog of Brachydanio rerio                                                                                                                                                                                                                                                                                                                                                                                                                                                                                                                                |
| 37831    | -3.19   | 0.14  | 0.0001 | 0.055   | 0.60                     | s_0002e11.<br>t7                       | Transmembrane 9 superfamily member 2.;<br>n=1; Takifugu rubripes Rep: Homolog of                                                                                                                                                                                                                                                                                                                                                                                                                                                                            |

|       |       |      |        |            |      |                                                                 |                                                                                                                                                                                                                                                                                                                                                                                                                                          |
|-------|-------|------|--------|------------|------|-----------------------------------------------------------------|------------------------------------------------------------------------------------------------------------------------------------------------------------------------------------------------------------------------------------------------------------------------------------------------------------------------------------------------------------------------------------------------------------------------------------------|
| 41726 | -3.30 | 0.15 | 0.0001 | 0.049<br>5 | 0.59 | all_v2.0.13<br>271.C1                                           | Brachydanio rerio Transmembrane 9<br>superfamily member 2 - Takifugu rubripes<br>Regulator of G-protein signaling 7-binding<br>protein (R7 family-binding protein).; n=1;<br>Takifugu rubripes Rep: Regulator of G-protein<br>signaling 7-binding protein (R7 family-binding<br>protein). - Takifugu rubripes                                                                                                                            |
| 45582 | -3.18 | 0.16 | 0.0001 | 0.055<br>2 | 0.58 | all_v2.0.38<br>06.C1.a                                          | non-directed                                                                                                                                                                                                                                                                                                                                                                                                                             |
| 55515 | -3.71 | 0.16 | 0.0000 | 0.043<br>9 | 0.53 | sb_gmnbspi<br>c_0008o09.<br>pDNRm13r<br>sb_gmapht<br>_0011j22.p | zgc:63779 [EC:1.-.-.]; K05544 tRNA-<br>dihydrouridine synthase 3                                                                                                                                                                                                                                                                                                                                                                         |
| 46595 | -3.63 | 0.18 | 0.0000 | 0.043<br>9 | 0.51 | DNRF2                                                           | Unassigned protein<br>Novel NACHT domain containing protein;<br>n=1; Danio rerio Rep: Novel NACHT domain<br>containing protein - Danio rerio (Zebrafish)<br>(Brachydanio rerio)                                                                                                                                                                                                                                                          |
| 39382 | -3.68 | 0.18 | 0.0000 | 0.043<br>9 | 0.50 | all_v2.0.16<br>966.C1                                           |                                                                                                                                                                                                                                                                                                                                                                                                                                          |
| 51763 | -3.32 | 0.30 | 0.0001 | 0.049<br>5 | 0.43 | all_v2.0.26<br>60.C1                                            | unclassified<br>Ubiquitin-conjugating enzyme E2 D2 (EC<br>6.3.2.19) (Ubiquitin-protein ligase D2)<br>(Ubiquitin carrier protein D2) (Ubiquitin-<br>conjugating enzyme E2-17 kDa 2) (E2(17)KB<br>2); n=32; Euteleostomi Rep: Ubiquitin-<br>conjugating enzyme E2 D2 (EC 6.3.2.19)<br>(Ubiquitin-protein ligase D2) (Ubiquitin carrier<br>protein D2) (Ubiquitin-conjugating enzyme<br>E2-17 kDa 2) (E2(17)KB 2) - Homo sapiens<br>(Human) |
| 42925 | -3.20 | 0.39 | 0.0001 | 0.055<br>2 | 0.39 | all_v2.0.94<br>63.C1                                            | MAK16-like protein RBM13; n=2; Danio<br>rerio Rep: MAK16-like protein RBM13 -<br>Danio rerio (Zebrafish) (Brachydanio rerio)                                                                                                                                                                                                                                                                                                             |
| 38901 | -3.47 | 0.32 | 0.0001 | 0.043<br>9 | 0.38 | all_v2.0.35<br>14.C1                                            | LIM and senescent cell antigen-like-containing<br>domain protein 1; n=22; Euteleostomi Rep:<br>LIM and senescent cell antigen-like-containing<br>domain protein 1 - Homo sapiens (Human)                                                                                                                                                                                                                                                 |
| 38791 | -3.65 | 0.51 | 0.0000 | 0.043<br>9 | 0.21 | all_v2.0.81<br>67.C1                                            |                                                                                                                                                                                                                                                                                                                                                                                                                                          |

<sup>a</sup>Fold-changes are presented as outputted by siggenes and were calculated as pIC/PBS

Supplemental Table S6b. 40 genes differentially expressed between fish injected with PBS at 16°C and sampled at 6HPI compared to non-injected fish held at 16°C

| Probe ID | d-value | Stdev | Raw p  | q-value | Fold Change <sup>a</sup> | Sequence Name                                                                  | Gene Name                                                                                                                                                                                                                                                                          |
|----------|---------|-------|--------|---------|--------------------------|--------------------------------------------------------------------------------|------------------------------------------------------------------------------------------------------------------------------------------------------------------------------------------------------------------------------------------------------------------------------------|
| 38707    | 4.07    | 0.18  | 0.0000 | 0.0264  | 2.10                     | all_v2.0.38<br>2.C2                                                            | Keratin, type I cytoskeletal 18; n=1; Oncorhynchus mykiss Rep: Keratin, type I cytoskeletal 18 - Oncorhynchus mykiss (Rainbow trout) (Salmo gairdneri)                                                                                                                             |
| 36479    | 4.68    | 0.11  | 0.0000 | 0.0189  | 1.92                     | all_v2.0.30<br>17.C1                                                           | chemokine (C-C motif) ligand 12; n=2; Rattus norvegicus Rep: chemokine (C-C motif) ligand 12 - Rattus norvegicus                                                                                                                                                                   |
| 53922    | -3.42   | 0.08  | 0.0001 | 0.0318  | 0.66                     | all_v2.0.98<br>49.C1                                                           | unclassified                                                                                                                                                                                                                                                                       |
| 35834    | -3.76   | 0.07  | 0.0000 | 0.0318  | 0.66                     | all_v2.0.14<br>969.C1                                                          | Alanine-glyoxylate aminotransferase; n=3; Danio rerio Rep: Alanine-glyoxylate aminotransferase - Danio rerio (Zebrafish) (Brachydanio rerio)                                                                                                                                       |
| 51062    | -3.22   | 0.11  | 0.0001 | 0.0396  | 0.65                     | all_v2.0.85<br>08.C1                                                           | unclassified                                                                                                                                                                                                                                                                       |
| 35673    | -3.67   | 0.09  | 0.0000 | 0.0318  | 0.63                     | sb_gmnbm<br>d_0015b19.<br>pDNRm13r<br>sb_gmnbhk<br>ic_0012e23<br>.pDNRm13<br>r | 60S ribosomal protein L18a; n=7; Clupeocephala Rep: 60S ribosomal protein L18a - Brachydanio rerio (Zebrafish) (Danio rerio)                                                                                                                                                       |
| 47408    | -3.53   | 0.10  | 0.0001 | 0.0318  | 0.63                     | sb_gmapht<br>_0030g24.p<br>DNRf2                                               | Unassigned protein                                                                                                                                                                                                                                                                 |
| 47382    | -3.14   | 0.13  | 0.0002 | 0.0397  | 0.63                     | sb_gmapov<br>_0025b10.p<br>DNRf2                                               | Unassigned protein<br>PREDICTED: similar to potassium voltage-gated channel KQT-like protein 4, partial; n=1; Danio rerio Rep: PREDICTED: similar to potassium voltage-gated channel KQT-like protein 4, partial - Danio rerio                                                     |
| 40857    | -3.70   | 0.10  | 0.0000 | 0.0318  | 0.61                     | all_v2.0.70<br>66.C3                                                           | unclassified                                                                                                                                                                                                                                                                       |
| 53832    | -4.06   | 0.09  | 0.0000 | 0.0264  | 0.61                     | all_v2.0.91<br>93.C1                                                           | unclassified                                                                                                                                                                                                                                                                       |
| 35728    | -3.14   | 0.16  | 0.0002 | 0.0397  | 0.59                     | all_v2.0.42<br>84.C1                                                           | Abhydrolase domain-containing protein 2-B; n=2; Danio rerio Rep: Abhydrolase domain-containing protein 2-B - Danio rerio (Zebrafish) (Brachydanio rerio)                                                                                                                           |
| 35697    | -3.22   | 0.16  | 0.0001 | 0.0396  | 0.58                     | all_v2.0.36<br>52.C1                                                           | 60S ribosomal protein L35a; n=2; Otophysi Rep: 60S ribosomal protein L35a - Ictalurus punctatus (Channel catfish)                                                                                                                                                                  |
| 36948    | -3.45   | 0.15  | 0.0001 | 0.0318  | 0.57                     | all_v2.0.95<br>6.C1                                                            | Dual specificity protein phosphatase 2 (EC 3.1.3.48) (EC 3.1.3.16) (Dual specificity protein phosphatase PAC-1).; n=1; Takifugu rubripes Rep: Dual specificity protein phosphatase 2 (EC 3.1.3.48) (EC 3.1.3.16) (Dual specificity protein phosphatase PAC-1). - Takifugu rubripes |
| 48898    | -3.13   | 0.18  | 0.0002 | 0.0397  | 0.55                     | all_v2.0.20<br>88.C2                                                           | Unassigned protein                                                                                                                                                                                                                                                                 |
| 53553    | -3.61   | 0.16  | 0.0001 | 0.0318  | 0.55                     | all_v2.0.17<br>041.C1                                                          | unclassified                                                                                                                                                                                                                                                                       |
| 37289    | -3.47   | 0.17  | 0.0001 | 0.0318  | 0.55                     | sb_gmnbhk<br>as_0019c20<br>.pDNRf2                                             | G protein-coupled receptor 155; n=1; Takifugu rubripes Rep: G protein-coupled receptor 155 - Fugu rubripes (Japanese pufferfish) (Takifugu rubripes)                                                                                                                               |
| 38629    | -3.36   | 0.22  | 0.0001 | 0.0318  | 0.51                     | sb_gmnlski<br>c_0014o15.<br>pDNRm13r                                           | Interleukin-1 receptor-associated kinase 4 (EC 2.7.11.1) (IRAK-4) (NY- REN-64 antigen).; n=1; Takifugu rubripes Rep: Interleukin-1 receptor-associated kinase 4 (EC 2.7.11.1) (IRAK-4) (NY- REN-64 antigen). - Takifugu rubripes                                                   |
| 42231    | -3.22   | 0.23  | 0.0002 | 0.0396  | 0.50                     | all_v2.0.39<br>01.C1                                                           | Skeletal muscle myosin heavy chain light meromyosin; n=10; Clupeocephala Rep:                                                                                                                                                                                                      |

|       |       |      |        |        |      |                                          |                                                                                                                                                                                                                                                                                                                                                                |
|-------|-------|------|--------|--------|------|------------------------------------------|----------------------------------------------------------------------------------------------------------------------------------------------------------------------------------------------------------------------------------------------------------------------------------------------------------------------------------------------------------------|
|       |       |      |        |        |      |                                          | Skeletal muscle myosin heavy chain light meromyosin - Clupea harengus (Atlantic herring)                                                                                                                                                                                                                                                                       |
| 48640 | -3.14 | 0.24 | 0.0002 | 0.0397 | 0.50 | sb_gmnl<br>0018p21.t7                    | Unassigned protein                                                                                                                                                                                                                                                                                                                                             |
| 46452 | -3.41 | 0.21 | 0.0001 | 0.0318 | 0.49 | all_v2.0.30<br>31.C1                     | Unassigned protein                                                                                                                                                                                                                                                                                                                                             |
| 40061 | -3.35 | 0.21 | 0.0001 | 0.0318 | 0.48 | sb_gmnbb<br>s_0007b11.<br>pDNRF2         | Poly(A) polymerase gamma; n=4;<br>Cyprinidae Rep: Poly(A) polymerase gamma -<br>Brachydanio rerio (Zebrafish) (Danio rerio)<br>Homolog of Brachydanio rerio Prosaposin.;<br>n=1; Takifugu rubripes Rep: Homolog of<br>Brachydanio rerio Prosaposin. - Takifugu<br>rubripes                                                                                     |
| 37768 | -3.37 | 0.26 | 0.0001 | 0.0318 | 0.46 | all_v2.0.72<br>28.C1                     | Novel NACHT domain containing protein;<br>n=1; Danio rerio Rep: Novel NACHT domain<br>containing protein - Danio rerio (Zebrafish)<br>(Brachydanio rerio)<br>Homolog of Brachydanio rerio<br>Transmembrane 9 superfamily member 2.;<br>n=1; Takifugu rubripes Rep: Homolog of<br>Brachydanio rerio Transmembrane 9<br>superfamily member 2 - Takifugu rubripes |
| 39382 | -3.39 | 0.27 | 0.0001 | 0.0318 | 0.45 | all_v2.0.16<br>966.C1                    | Homolog of Brachydanio rerio<br>Transmembrane 9 superfamily member 2.;<br>n=1; Takifugu rubripes Rep: Homolog of<br>Brachydanio rerio Transmembrane 9<br>superfamily member 2 - Takifugu rubripes                                                                                                                                                              |
| 37831 | -3.36 | 0.28 | 0.0001 | 0.0318 | 0.44 | sb_gmnlsf<br>s_0002e11.<br>t7            | Unassigned protein                                                                                                                                                                                                                                                                                                                                             |
| 46595 | -3.69 | 0.21 | 0.0000 | 0.0318 | 0.44 | sb_gmapht<br>_0011j22.p<br>DNRF2         | Birc4 protein; n=7; Danio rerio Rep: Birc4<br>protein - Danio rerio (Zebrafish) (Brachydanio<br>rerio)                                                                                                                                                                                                                                                         |
| 36177 | -3.13 | 0.33 | 0.0002 | 0.0397 | 0.43 | sb_gmnlem<br>_0010g13.t<br>7             | IgD mRNA for immunoglobulin D; n=1;<br>Takifugu rubripes Rep: IgD mRNA for<br>immunoglobulin D - Takifugu rubripes<br>Si:dkey-103i16.1 protein; n=3; Danio<br>rerio Rep: Si:dkey-103i16.1 protein - Danio<br>rerio (Zebrafish) (Brachydanio rerio)                                                                                                             |
| 38545 | -3.14 | 0.33 | 0.0002 | 0.0397 | 0.43 | all_v2.0.23<br>19.C2                     | Regulatory-associated protein of mTOR<br>(Raptor) (P150 target of rapamycin (TOR)-<br>scaffold protein); n=24; Tetrapoda Rep:<br>Regulatory-associated protein of mTOR<br>(Raptor) (P150 target of rapamycin (TOR)-<br>scaffold protein) - Homo sapiens (Human)                                                                                                |
| 42166 | -4.33 | 0.21 | 0.0000 | 0.0223 | 0.42 | all_v2.0.76<br>54.C1                     | Unassigned protein                                                                                                                                                                                                                                                                                                                                             |
| 46707 | -3.53 | 0.30 | 0.0001 | 0.0318 | 0.42 | sb_gmnbhk<br>ic_0016o08<br>.pDNRm13<br>r | LIM homeobox 8; n=4; Euteleostomi Rep:<br>LIM homeobox 8 - Danio rerio (Zebrafish)<br>(Brachydanio rerio)<br>Mitochondrial import inner membrane<br>translocase subunit Tim23; n=3; Otophysi Rep:<br>Mitochondrial import inner membrane<br>translocase subunit Tim23 - Danio rerio<br>(Zebrafish) (Brachydanio rerio)                                         |
| 41730 | -4.76 | 0.22 | 0.0000 | 0.0189 | 0.36 | sb_gmapov<br>_0017j04.p<br>DNRm13r       | Unassigned protein                                                                                                                                                                                                                                                                                                                                             |
| 47560 | -3.49 | 0.37 | 0.0001 | 0.0318 | 0.35 | sb_gmapte<br>_0001n01.p<br>DNRm13r       | LIM and senescent cell antigen-like-containing<br>domain protein 1; n=22; Euteleostomi Rep:<br>LIM and senescent cell antigen-like-containing<br>domain protein 1 - Homo sapiens (Human)                                                                                                                                                                       |
| 38794 | -3.91 | 0.31 | 0.0000 | 0.0310 | 0.34 | all_v2.0.10<br>412.C1                    | Unassigned protein                                                                                                                                                                                                                                                                                                                                             |
| 39112 | -3.16 | 0.55 | 0.0002 | 0.0397 | 0.28 | all_v2.0.13<br>43.C1                     | Unassigned protein                                                                                                                                                                                                                                                                                                                                             |
| 48085 | -3.64 | 0.54 | 0.0000 | 0.0318 | 0.26 | sb_gmnl<br>0019f11.t7                    | Unassigned protein                                                                                                                                                                                                                                                                                                                                             |
| 38791 | -3.11 | 0.58 | 0.0002 | 0.0401 | 0.23 | all_v2.0.81<br>67.C1                     | Unassigned protein                                                                                                                                                                                                                                                                                                                                             |

<sup>a</sup>Fold-changes are presented as outputted by siggenes and were calculated as pIC/PBS

Supplemental Table S6c. 18 genes differentially expressed between fish injected with PBS at 10°C and sampled at 24HPI compared to non-injected fish held at 10°C

| Probe ID | d-value | Stdev | Raw p  | q-value    | Fold Change <sup>a</sup> | Sequence Name                 | Gene Name                                                                                                                                                                                                                                                                                                                                                                                                                                                 |
|----------|---------|-------|--------|------------|--------------------------|-------------------------------|-----------------------------------------------------------------------------------------------------------------------------------------------------------------------------------------------------------------------------------------------------------------------------------------------------------------------------------------------------------------------------------------------------------------------------------------------------------|
| 50050    | 4.42    | 0.24  | 0.0000 | 0.036<br>7 | 2.54                     | all_v2.0.1<br>891.C1          | unclassified<br>Novel protein similar to human and mouse origin recognition complex, subunit 6 homolog-like; n=1; Danio rerio Rep: Novel protein similar to human and mouse origin recognition complex, subunit 6 homolog-like - Danio rerio (Zebrafish) (Brachydanio rerio)                                                                                                                                                                              |
| 39412    | 3.75    | 0.25  | 0.0001 | 0.072<br>7 | 2.25                     | all_v2.0.3<br>466.C1          |                                                                                                                                                                                                                                                                                                                                                                                                                                                           |
| 48489    | 5.28    | 0.14  | 0.0000 | 0.012<br>9 | 2.06                     | sb_gmnle<br>m_0003i1<br>6.sp6 | Unassigned protein<br>5-aminolevulinate synthase, erythroid-specific, mitochondrial precursor (EC 2.3.1.37) (5-aminolevulinic acid synthase) (Delta- aminolevulinate synthase) (Delta-ALA synthetase) (ALAS-E); n=1; Takifugu rubripes Rep: 5-aminolevulinate synthase, erythroid-specific, mitochondrial precursor (EC 2.3.1.37) (5-aminolevulinic acid synthase) (Delta- aminolevulinate synthase) (Delta-ALA synthetase) (ALAS-E). - Takifugu rubripes |
| 35661    | 3.38    | 0.20  | 0.0002 | 0.086<br>2 | 1.87                     | all_v2.0.1<br>0965.C2         | Novel protein containing a short chain dehydrogenase domain; n=3; Danio rerio Rep: Novel protein containing a short chain dehydrogenase domain - Danio rerio (Zebrafish) (Brachydanio rerio)                                                                                                                                                                                                                                                              |
| 39388    | 3.65    | 0.15  | 0.0001 | 0.072<br>7 | 1.69                     | all_v2.0.1<br>2658.C1         |                                                                                                                                                                                                                                                                                                                                                                                                                                                           |
| 44195    | 4.22    | 0.11  | 0.0000 | 0.044<br>9 | 1.66                     | sb_gmnle<br>m_0025b1<br>0.t7  | [E] COG0421 Spermidine synthase<br>Homolog of Homo sapiens Spastic ataxia of Charlevoix-Saguenay; n=1; Takifugu rubripes Rep: Homolog of Homo sapiens Spastic ataxia of Charlevoix-Saguenay - Takifugu rubripes                                                                                                                                                                                                                                           |
| 38355    | 3.99    | 0.12  | 0.0000 | 0.063<br>1 | 1.62                     | all_v2.0.8<br>243.C2          |                                                                                                                                                                                                                                                                                                                                                                                                                                                           |
| 44726    | 4.63    | 0.07  | 0.0000 | 0.035<br>6 | 1.51                     | all_v2.0.4<br>995.C2          | DUF1891 domain containing protein                                                                                                                                                                                                                                                                                                                                                                                                                         |
| 49865    | 3.33    | 0.11  | 0.0002 | 0.086<br>2 | 1.49                     | all_v2.0.1<br>90.C1           | unclassified                                                                                                                                                                                                                                                                                                                                                                                                                                              |
| 49958    | 3.40    | 0.11  | 0.0002 | 0.086<br>2 | 1.49                     | all_v2.0.4<br>323.C1          | unclassified<br>PREDICTED: similar to transposase (putative); n=1; Danio rerio Rep: PREDICTED: similar to transposase (putative) - Danio rerio                                                                                                                                                                                                                                                                                                            |
| 41096    | 3.43    | 0.08  | 0.0001 | 0.086<br>2 | 1.40                     | all_v2.0.1<br>554.C7          | Calcium binding and coiled-coil domain 2; n=5; Danio rerio Rep: Calcium binding and coiled-coil domain 2 - Danio rerio (Zebrafish) (Brachydanio rerio)                                                                                                                                                                                                                                                                                                    |
| 36247    | 3.90    | 0.06  | 0.0000 | 0.063<br>1 | 1.38                     | all_v2.0.7<br>703.C1          |                                                                                                                                                                                                                                                                                                                                                                                                                                                           |
| 51110    | -3.54   | 0.12  | 0.0001 | 0.072<br>7 | 0.66                     | all_v2.0.1<br>1720.C1         | unclassified<br>Protein mago nashi homolog 2; n=25; Coelomata Rep: Protein mago nashi homolog 2 - Homo sapiens (Human)                                                                                                                                                                                                                                                                                                                                    |
| 41491    | -3.55   | 0.13  | 0.0001 | 0.072<br>7 | 0.63                     | all_v2.0.8<br>71.C1           |                                                                                                                                                                                                                                                                                                                                                                                                                                                           |

|       |       |      |        |            |      |                                 |                                                                                                                                                          |
|-------|-------|------|--------|------------|------|---------------------------------|----------------------------------------------------------------------------------------------------------------------------------------------------------|
| 46595 | -3.85 | 0.14 | 0.0000 | 0.063<br>1 | 0.58 | sb_gmap<br>t_0011j22.<br>pDNRF2 | Unassigned protein                                                                                                                                       |
| 39382 | -3.54 | 0.19 | 0.0001 | 0.072<br>7 | 0.54 | all_v2.0.1<br>6966.C1           | Novel NACHT domain containing protein; n=1; Danio rerio Rep: Novel NACHT domain containing protein - Danio rerio (Zebrafish) (Brachydanio rerio)         |
| 42813 | -3.56 | 0.20 | 0.0001 | 0.072<br>7 | 0.51 | all_v2.0.5<br>869.C1            | Tryptophan hydroxylase 2; n=4; Danio rerio Rep: Tryptophan hydroxylase 2 - Danio rerio (Zebrafish) (Brachydanio rerio)                                   |
| 37525 | -3.53 | 0.22 | 0.0001 | 0.072<br>7 | 0.51 | all_v2.0.3<br>167.C1            | H/ACA ribonucleoprotein complex subunit 3; n=1; Danio rerio Rep: H/ACA ribonucleoprotein complex subunit 3 - Danio rerio (Zebrafish) (Brachydanio rerio) |

<sup>a</sup>Fold-changes are presented as outputted by siggenes and were calculated as pIC/PBS



Supplemental Table S6d. 97 genes differentially expressed between fish injected with PBS at 16°C and sampled at 24HPI compared to non-injected fish held at 16°C

| Probe ID | d-value | Stdev | Raw p  | q-value    | Fold Change <sup>a</sup> | Sequence Name                                                    | Gene Name                                                                                                                                                                                                                                                                                                                                  |
|----------|---------|-------|--------|------------|--------------------------|------------------------------------------------------------------|--------------------------------------------------------------------------------------------------------------------------------------------------------------------------------------------------------------------------------------------------------------------------------------------------------------------------------------------|
| 44102    | 4.93    | 0.27  | 0.0000 | 0.013<br>5 | 2.93                     | all_v2.0.6<br>017.C3                                             | Zgc:92811; n=1; Danio rerio Rep: Zgc:92811 - Danio rerio (Zebrafish) (Brachydanio rerio)<br>PREDICTED: similar to Zinc finger, TTF-type; HAT dimerisation; Nucleic acid-binding, OB-fold; n=1; Nasonia vitripennis Rep: PREDICTED: similar to Zinc finger, TTF-type; HAT dimerisation; Nucleic acid-binding, OB-fold - Nasonia vitripennis |
| 41271    | 5.13    | 0.20  | 0.0000 | 0.011<br>9 | 2.36                     | all_v2.0.1<br>6856.C1                                            |                                                                                                                                                                                                                                                                                                                                            |
| 49334    | 6.25    | 0.13  | 0.0000 | 0.009<br>9 | 1.99                     | all_v2.0.1<br>0309.C2                                            | unclassified<br>Homolog of Homo sapiens Mammalian ependymin related protein-1 precursor; n=1; Takifugu rubripes Rep: Homolog of Homo sapiens Mammalian ependymin related protein-1 precursor - Takifugu rubripes                                                                                                                           |
| 38154    | 4.67    | 0.15  | 0.0001 | 0.016<br>1 | 1.78                     | all_v2.0.4<br>20.C1                                              |                                                                                                                                                                                                                                                                                                                                            |
| 50596    | 6.03    | 0.11  | 0.0000 | 0.009<br>9 | 1.77                     | all_v2.0.1<br>3909.C1                                            | unclassified<br>Transmembrane protein HTP-1; n=1; Danio rerio Rep: Transmembrane protein HTP-1 - Danio rerio (Zebrafish) (Brachydanio rerio)                                                                                                                                                                                               |
| 42753    | 4.54    | 0.11  | 0.0001 | 0.017<br>4 | 1.56                     | all_v2.0.1<br>6847.C1                                            | Blocked early in transport 1 homolog; n=1; Danio rerio Rep: Blocked early in transport 1 homolog - Danio rerio (Zebrafish) (Brachydanio rerio)                                                                                                                                                                                             |
| 36183    | 4.47    | 0.11  | 0.0001 | 0.018<br>0 | 1.56                     | sb_gmnle<br>m_0014h2<br>3.t7                                     |                                                                                                                                                                                                                                                                                                                                            |
| 48344    | 5.69    | 0.08  | 0.0000 | 0.009<br>9 | 1.50                     | sb_gmnlkf<br>as_0003n<br>17.t7                                   | Unassigned protein                                                                                                                                                                                                                                                                                                                         |
| 40642    | 4.74    | 0.08  | 0.0001 | 0.014<br>9 | 1.43                     | sb_gmaph<br>t_0014o12<br>.pDNRF2<br>sb_gmnle<br>m_0016p1<br>1.t7 | PREDICTED: similar to Matrnx3; n=2; Canis familiaris Rep: PREDICTED: similar to Matrnx3 - Canis familiaris                                                                                                                                                                                                                                 |
| 46532    | 4.49    | 0.06  | 0.0001 | 0.018<br>0 | 1.33                     | all_v2.0.1<br>0936.C1                                            | Unassigned protein                                                                                                                                                                                                                                                                                                                         |
| 50359    | 5.01    | 0.05  | 0.0000 | 0.013<br>1 | 1.32                     | all_v2.0.1<br>0936.C1                                            | unclassified                                                                                                                                                                                                                                                                                                                               |
| 44647    | 4.56    | 0.06  | 0.0001 | 0.017<br>2 | 1.30                     | all_v2.0.6<br>14.C1                                              | dhx15; DEAH (Asp-Glu-Ala-His) box polypeptide 15                                                                                                                                                                                                                                                                                           |
| 42052    | -3.87   | 0.06  | 0.0003 | 0.025<br>7 | 0.80                     | sb_gmapo<br>v_0016g0<br>7.pDNRF<br>2                             | Selenoprotein W2a; n=3; Danio rerio Rep: Selenoprotein W2a - Brachydanio rerio (Zebrafish) (Danio rerio)                                                                                                                                                                                                                                   |
| 35705    | -3.76   | 0.06  | 0.0004 | 0.026<br>9 | 0.79                     | all_v2.0.9<br>88.C1                                              | 60S ribosomal protein L7a; n=39; Euteleostomi Rep: 60S ribosomal protein L7a - Fugu rubripes (Japanese pufferfish) (Takifugu rubripes)                                                                                                                                                                                                     |
| 39758    | -3.89   | 0.07  | 0.0003 | 0.025<br>6 | 0.77                     | all_v2.0.2<br>758.C2                                             | Nucleolar RNA helicase 2 (EC 3.6.1.-) (Nucleolar RNA helicase II) (Nucleolar RNA helicase Gu) (RH II/Gu) (Gu-alpha) (DEAD box protein 21).; n=1; Takifugu rubripes Rep: Nucleolar RNA helicase 2 (EC 3.6.1.-) (Nucleolar RNA helicase II) (Nucleolar RNA helicase Gu) (RH II/Gu) (Gu-alpha) (DEAD box protein 21). - Takifugu rubripes     |

|       |       |      |        |            |      |                                              |                                                                                                                                                                                                                                                                                                      |
|-------|-------|------|--------|------------|------|----------------------------------------------|------------------------------------------------------------------------------------------------------------------------------------------------------------------------------------------------------------------------------------------------------------------------------------------------------|
| 42683 | -4.34 | 0.06 | 0.0001 | 0.020<br>4 | 0.77 | all_v2.0.1<br>4639.C1                        | Transketolase-like protein 2 (EC 2.2.1.1.); n=1; Takifugu rubripes Rep: Transketolase-like protein 2 (EC 2.2.1.1.) - Takifugu rubripes                                                                                                                                                               |
| 42261 | -5.47 | 0.04 | 0.0000 | 0.009<br>9 | 0.77 | all_v2.0.9<br>140.C1                         | Smoothelin-C.; n=1; Gallus gallus Rep: Smoothelin-C. - Gallus gallus 60S ribosomal protein L18a; n=8; Clupeocephala Rep: 60S ribosomal protein L18a - Ictalurus punctatus (Channel catfish)                                                                                                          |
| 35674 | -5.79 | 0.04 | 0.0000 | 0.009<br>9 | 0.76 | all_v2.0.1<br>527.C1<br>sb_gmbh<br>kas_00151 | Zgc:136770; n=3; Danio rerio Rep: Zgc:136770 - Danio rerio (Zebrafish)                                                                                                                                                                                                                               |
| 43616 | -3.93 | 0.08 | 0.0003 | 0.024<br>2 | 0.75 | 23.pDNR<br>F2                                | (Brachydanio rerio)                                                                                                                                                                                                                                                                                  |
| 36265 | -3.92 | 0.08 | 0.0003 | 0.024<br>8 | 0.74 | all_v2.0.2<br>34.C13                         | Calmodulin; n=24; Eukaryota Rep: Calmodulin - Homo sapiens (Human) Calmodulin (CaM).; n=1; Canis lupus familiaris Rep: Calmodulin (CaM). - Canis familiaris                                                                                                                                          |
| 36262 | -3.97 | 0.08 | 0.0003 | 0.024<br>2 | 0.74 | all_v2.0.9<br>474.C1                         | RNA-binding protein PNO1; n=1; Oryzias latipes Rep: RNA-binding protein PNO1 - Oryzias latipes (Medaka fish) (Japanese ricefish)                                                                                                                                                                     |
| 41967 | -5.25 | 0.06 | 0.0000 | 0.011<br>7 | 0.73 | all_v2.0.7<br>960.C1                         | Ribosomal protein S2; n=8; Euteleostomi Rep: Ribosomal protein S2 - Danio rerio (Zebrafish) (Brachydanio rerio)                                                                                                                                                                                      |
| 41908 | -3.77 | 0.10 | 0.0004 | 0.026<br>8 | 0.72 | all_v2.0.3<br>157.C3                         | Acidic leucine-rich nuclear phosphoprotein 32 family member A; n=1; Danio rerio Rep: Acidic leucine-rich nuclear phosphoprotein 32 family member A - Danio rerio (Zebrafish) (Brachydanio rerio)                                                                                                     |
| 35742 | -3.95 | 0.09 | 0.0003 | 0.024<br>2 | 0.72 | all_v2.0.4<br>656.C1<br>sb_gmbh<br>kas_0007  | UPI000069E497 related cluster; n=1; Xenopus tropicalis Rep: UPI000069E497 UniRef100 entry - Xenopus tropicalis                                                                                                                                                                                       |
| 43009 | -3.90 | 0.09 | 0.0003 | 0.025<br>3 | 0.72 | m19.pDN<br>RF2                               | Homolog of Brachydanio rerio Eukaryotic translation elongation factor 1 beta 2.; n=1; Takifugu rubripes Rep: Homolog of Brachydanio rerio Eukaryotic translation elongation factor 1 beta 2 - Takifugu rubripes                                                                                      |
| 37705 | -3.81 | 0.10 | 0.0004 | 0.026<br>7 | 0.72 | all_v2.0.1<br>0051.C1                        | Eukaryotic translation elongation factor 1 beta 2 - Takifugu rubripes                                                                                                                                                                                                                                |
| 52886 | -3.78 | 0.10 | 0.0004 | 0.026<br>7 | 0.72 | all_v2.0.3<br>166.C1                         | unclassified                                                                                                                                                                                                                                                                                         |
| 36877 | -4.12 | 0.09 | 0.0002 | 0.021<br>8 | 0.71 | all_v2.0.1<br>6110.C1                        | DNA (cytosine-5)-methyltransferase 1 (EC 2.1.1.37) (Dnmt1) (DNA methyltransferase HsaI) (DNA MTase HsaI) (MCMT) (M.HsaI).; n=1; Takifugu rubripes Rep: DNA (cytosine-5)-methyltransferase 1 (EC 2.1.1.37) (Dnmt1) (DNA methyltransferase HsaI) (DNA MTase HsaI) (MCMT) (M.HsaI). - Takifugu rubripes |
| 42610 | -5.00 | 0.07 | 0.0000 | 0.013<br>1 | 0.71 | sb_gmnlkf<br>ic_0005i1<br>7.t7               | Toll-like receptor 3-like protein; n=2; Oncorhynchus mykiss Rep: Toll-like receptor 3-like protein - Oncorhynchus mykiss (Rainbow trout) (Salmo gairdneri) 60S ribosomal protein L10; n=7; Theria Rep: 60S ribosomal protein L10 - Homo sapiens (Human)                                              |
| 35669 | -3.95 | 0.10 | 0.0003 | 0.024<br>2 | 0.70 | all_v2.0.3<br>432.C1                         | 60S ribosomal protein L10 - Homo sapiens (Human)                                                                                                                                                                                                                                                     |
| 41974 | -4.33 | 0.09 | 0.0001 | 0.020      | 0.70 | sb_gmbh                                      | Rpl3-prov protein; n=6;                                                                                                                                                                                                                                                                              |

|       |       |      |        |            |      |                                          |                                                                                                                                                                                                                                                                                                                                                                                                                                                    |
|-------|-------|------|--------|------------|------|------------------------------------------|----------------------------------------------------------------------------------------------------------------------------------------------------------------------------------------------------------------------------------------------------------------------------------------------------------------------------------------------------------------------------------------------------------------------------------------------------|
|       |       |      |        | 4          |      | kic_0017h<br>23.pDNR<br>m13r             | Euteleostomi Rep: Rpl3-prov protein -<br>Xenopus laevis (African clawed frog)                                                                                                                                                                                                                                                                                                                                                                      |
| 35673 | -4.23 | 0.10 | 0.0001 | 0.020<br>4 | 0.69 | sb_gmnb<br>md_0015b<br>19.pDNR<br>m13r   | 60S ribosomal protein L18a; n=7;<br>Clupeocephala Rep: 60S ribosomal<br>protein L18a - Brachydanio rerio<br>(Zebrafish) (Danio rerio)<br>PREDICTED: similar to ribosomal<br>protein S2 [Homo sapiens]                                                                                                                                                                                                                                              |
| 46058 | -4.47 | 0.10 | 0.0001 | 0.018<br>0 | 0.69 | sb_gmnbli<br>ts_0018a2<br>1.pDNRm<br>13r | ref XP_001126232.1  PREDICTED:<br>similar to ribosomal protein S2 [Homo<br>sapiens]<br>60S ribosomal protein L7a; n=11;<br>Amniota Rep: 60S ribosomal protein L7a<br>- Gallus gallus (Chicken)                                                                                                                                                                                                                                                     |
| 35704 | -4.11 | 0.11 | 0.0002 | 0.021<br>8 | 0.68 | all_v2.0.9<br>88.C3                      |                                                                                                                                                                                                                                                                                                                                                                                                                                                    |
| 51414 | -5.42 | 0.08 | 0.0000 | 0.010<br>1 | 0.67 | all_v2.0.2<br>338.C1                     | unclassified                                                                                                                                                                                                                                                                                                                                                                                                                                       |
| 48328 | -3.94 | 0.12 | 0.0003 | 0.024<br>2 | 0.67 | sb_gmnbgi<br>i_0004b17<br>.pDNRm1<br>3r  | Unassigned protein<br>CREB-binding protein (EC 2.3.1.48).;<br>n=4; Amniota Rep: CREB-binding<br>protein (EC 2.3.1.48). - Gallus gallus                                                                                                                                                                                                                                                                                                             |
| 36672 | -4.86 | 0.09 | 0.0000 | 0.013<br>5 | 0.67 | all_v2.0.1<br>2537.C1                    |                                                                                                                                                                                                                                                                                                                                                                                                                                                    |
| 44782 | -4.71 | 0.10 | 0.0001 | 0.015<br>1 | 0.67 | all_v2.0.5<br>759.C1                     | erythrocyte binding protein                                                                                                                                                                                                                                                                                                                                                                                                                        |
| 45515 | -3.94 | 0.12 | 0.0003 | 0.024<br>2 | 0.66 | all_v2.0.8<br>577.C1                     | non-directed                                                                                                                                                                                                                                                                                                                                                                                                                                       |
| 41975 | -4.22 | 0.11 | 0.0002 | 0.020<br>4 | 0.66 | sb_gmnbh<br>kic_0017h<br>23.pDNR<br>F2   | Rpl3-prov protein; n=6;<br>Euteleostomi Rep: Rpl3-prov protein -<br>Xenopus laevis (African clawed frog)                                                                                                                                                                                                                                                                                                                                           |
| 48274 | -4.44 | 0.11 | 0.0001 | 0.018<br>9 | 0.66 | sb_gmlbgi<br>ts_0004a1<br>9.sp6          | Unassigned protein                                                                                                                                                                                                                                                                                                                                                                                                                                 |
| 42980 | -4.26 | 0.11 | 0.0001 | 0.020<br>4 | 0.66 | sb_gmaph<br>t_0033g21<br>.pDNRm1<br>3r   | UPI0000567126 related cluster; n=2;<br>Danio rerio Rep: UPI0000567126<br>UniRef100 entry - Danio rerio<br>Mid1-interacting protein 1 (Gastrulation-<br>specific G12-like protein) (Mid1-<br>interacting G12-like protein) (Protein<br>STRAIT11499).; n=1; Takifugu<br>rubripes Rep: Mid1-interacting protein 1<br>(Gastrulation-specific G12-like protein)<br>(Mid1-interacting G12-like protein)<br>(Protein STRAIT11499). - Takifugu<br>rubripes |
| 39084 | -4.01 | 0.12 | 0.0002 | 0.024<br>2 | 0.66 | all_v2.0.8<br>37.C1                      |                                                                                                                                                                                                                                                                                                                                                                                                                                                    |
| 52549 | -3.80 | 0.14 | 0.0004 | 0.026<br>7 | 0.65 | all_v2.0.4<br>100.C1                     | unclassified<br>PREDICTED: similar to cytoplasmic<br>beta-actin; n=2; Homo/Pan/Gorilla<br>group Rep: PREDICTED: similar to<br>cytoplasmic beta-actin - Homo sapiens<br>Elongation factor 1-alpha; n=2; Gadus<br>morhua Rep: Elongation factor 1-alpha -<br>Gadus morhua (Atlantic cod)                                                                                                                                                             |
| 40387 | -4.25 | 0.12 | 0.0001 | 0.020<br>4 | 0.65 | sb_gmnlr<br>ta_0003a0<br>6.t7            |                                                                                                                                                                                                                                                                                                                                                                                                                                                    |
| 37007 | -5.69 | 0.08 | 0.0000 | 0.009<br>9 | 0.65 | all_v2.0.2<br>34.C15                     |                                                                                                                                                                                                                                                                                                                                                                                                                                                    |
| 50837 | -4.52 | 0.11 | 0.0001 | 0.017<br>4 | 0.65 | all_v2.0.3<br>307.C2                     | unclassified                                                                                                                                                                                                                                                                                                                                                                                                                                       |
| 49731 | -3.81 | 0.13 | 0.0004 | 0.026<br>7 | 0.65 | all_v2.0.9<br>379.C1                     | unclassified                                                                                                                                                                                                                                                                                                                                                                                                                                       |
| 48831 | -4.01 | 0.13 | 0.0002 | 0.024      | 0.64 | sb_gmnbh                                 | Unassigned protein                                                                                                                                                                                                                                                                                                                                                                                                                                 |

|       |       |      |        |            |      |  |                                        |                                                                                                                                                                                                                                                                                                                                                                                                     |
|-------|-------|------|--------|------------|------|--|----------------------------------------|-----------------------------------------------------------------------------------------------------------------------------------------------------------------------------------------------------------------------------------------------------------------------------------------------------------------------------------------------------------------------------------------------------|
|       |       |      |        | 2          |      |  | kic_0011n<br>05.pDNR<br>F2             |                                                                                                                                                                                                                                                                                                                                                                                                     |
| 54908 | -3.74 | 0.15 | 0.0004 | 0.027<br>3 | 0.64 |  | all_v2.0.2<br>435.C2                   | unclassified                                                                                                                                                                                                                                                                                                                                                                                        |
| 46270 | -3.82 | 0.13 | 0.0004 | 0.026<br>7 | 0.64 |  | sb_gmapo<br>v_0011p1<br>3.pDNR<br>2    | Slc24a4; solute carrier family 24<br>(sodium/potassium/calcium exchanger),<br>member 4<br>PREDICTED: similar to Actin,<br>cytoplasmic 2 (Gamma-actin); n=1;<br>Rattus norvegicus Rep: PREDICTED:<br>similar to Actin, cytoplasmic 2 (Gamma-<br>actin) - Rattus norvegicus                                                                                                                           |
| 40185 | -4.06 | 0.13 | 0.0002 | 0.023<br>0 | 0.64 |  | Cod actin                              | SWI/SNF-related matrix-associated actin-<br>dependent regulator of chromatin<br>subfamily A containing DEAD/H box 1<br>(EC 3.6.1.-) (ATP- dependent helicase 1)<br>(hHEL1).; n=2; Gallus gallus Rep:<br>SWI/SNF-related matrix-associated actin-<br>dependent regulator of chromatin<br>subfamily A containing DEAD/H box 1<br>(EC 3.6.1.-) (ATP- dependent helicase 1)<br>(hHEL1). - Gallus gallus |
| 42435 | -5.15 | 0.11 | 0.0000 | 0.011<br>9 | 0.62 |  | all_v2.0.4<br>777.C1                   | Reverse transcriptase; n=6; Fundulus<br>heteroclitus Rep: Reverse transcriptase -<br>Fundulus heteroclitus (Killifish)<br>(Mummichog)                                                                                                                                                                                                                                                               |
| 41780 | -3.75 | 0.15 | 0.0004 | 0.026<br>9 | 0.62 |  | sb_gmapt<br>e_0013b0<br>4.pDNRm<br>13r | Zgc:64214; n=2; Danio rerio Rep:<br>Zgc:64214 - Danio rerio (Zebrafish)<br>(Brachydanio rerio)                                                                                                                                                                                                                                                                                                      |
| 43903 | -3.94 | 0.15 | 0.0003 | 0.024<br>2 | 0.62 |  | all_v2.0.1<br>7667.C1                  | Homolog of Brachydanio rerio Novel<br>ABC transporter similar to human<br>multidrug-resistance proteins (MRP).;<br>n=1; Takifugu rubripes Rep: Homolog of<br>Brachydanio rerio Novel ABC transporter<br>similar to human multidrug-resistance<br>proteins (MRP). - Takifugu rubripes<br>Zgc:86833; n=3; Clupeocephala Rep:<br>Zgc:86833 - Danio rerio (Zebrafish)<br>(Brachydanio rerio)            |
| 37745 | -5.63 | 0.10 | 0.0000 | 0.009<br>9 | 0.62 |  | sb_gmapo<br>v_0020h1<br>1.pDNR<br>2    | Myosin_tail_1 multi-domain protein                                                                                                                                                                                                                                                                                                                                                                  |
| 44008 | -3.85 | 0.15 | 0.0003 | 0.025<br>7 | 0.62 |  | all_v2.0.3<br>117.C1                   | unclassified                                                                                                                                                                                                                                                                                                                                                                                        |
| 45466 | -4.28 | 0.13 | 0.0001 | 0.020<br>4 | 0.62 |  | all_v2.0.9<br>014.C1                   | Pol-like protein; n=1; Danio rerio Rep:<br>Pol-like protein - Danio rerio (Zebrafish)<br>(Brachydanio rerio)                                                                                                                                                                                                                                                                                        |
| 49397 | -3.76 | 0.15 | 0.0004 | 0.026<br>8 | 0.61 |  | all_v2.0.5<br>648.C2                   | unclassified                                                                                                                                                                                                                                                                                                                                                                                        |
| 40037 | -4.24 | 0.14 | 0.0001 | 0.020<br>4 | 0.60 |  | all_v2.0.1<br>5772.C1                  | unclassified                                                                                                                                                                                                                                                                                                                                                                                        |
| 53802 | -3.73 | 0.17 | 0.0004 | 0.027<br>3 | 0.60 |  | all_v2.0.6<br>636.C2                   | unclassified                                                                                                                                                                                                                                                                                                                                                                                        |
| 51485 | -3.96 | 0.16 | 0.0003 | 0.024<br>2 | 0.60 |  | all_v2.0.1<br>6707.C1                  | unclassified                                                                                                                                                                                                                                                                                                                                                                                        |
| 42233 | -4.08 | 0.15 | 0.0002 | 0.022<br>5 | 0.60 |  | sb_gmbp<br>cic_0005o<br>11.pDNR<br>F2  | Skint 2 isoform b precursor; n=6; Mus<br>musculus Rep: Skint 2 isoform b<br>precursor - Mus musculus (Mouse)<br>PREDICTED: similar to thymosin, beta<br>4; n=1; Canis lupus familiaris Rep:<br>PREDICTED: similar to thymosin, beta 4<br>- Canis familiaris                                                                                                                                         |
| 41068 | -3.88 | 0.17 | 0.0003 | 0.025<br>6 | 0.60 |  | all_v2.0.1<br>797.C1                   | unclassified                                                                                                                                                                                                                                                                                                                                                                                        |
| 53602 | -4.24 | 0.16 | 0.0001 | 0.020<br>4 | 0.59 |  | all_v2.0.1<br>269.C1                   | unclassified                                                                                                                                                                                                                                                                                                                                                                                        |

|       |       |      |        |            |      |                                          |                                                                                                                                                                                                                                                                                                                                                                                                                                                                                                                                                                                                                                                                                                                                                |
|-------|-------|------|--------|------------|------|------------------------------------------|------------------------------------------------------------------------------------------------------------------------------------------------------------------------------------------------------------------------------------------------------------------------------------------------------------------------------------------------------------------------------------------------------------------------------------------------------------------------------------------------------------------------------------------------------------------------------------------------------------------------------------------------------------------------------------------------------------------------------------------------|
| 43495 | -3.97 | 0.16 | 0.0003 | 0.024<br>2 | 0.59 | sb_gmnbh<br>kic_0020c<br>19.pDNR<br>F2   | Zgc:112166; n=4; Danio rerio Rep:<br>Zgc:112166 - Danio rerio (Zebrafish)<br>(Brachydanio rerio)<br>Probable signal peptidase complex<br>subunit 2; n=2; Danio rerio Rep: Probable<br>signal peptidase complex subunit 2 -<br>Danio rerio (Zebrafish) (Brachydanio<br>rerio)                                                                                                                                                                                                                                                                                                                                                                                                                                                                   |
| 41357 | -3.96 | 0.17 | 0.0003 | 0.024<br>2 | 0.59 | all_v2.0.2<br>785.C1                     | Troponin 1-like protein; n=1; Sparus<br>aurata Rep: Troponin 1-like protein -<br>Sparus aurata (Gilthead sea bream)<br>Kynurenine/alpha-aminoadipate<br>aminotransferase mitochondrial precursor<br>(KAT/AadAT) (Kynurenine--<br>oxoglutarate transaminase II) (EC 2.6.1.7)<br>(Kynurenine aminotransferase II)<br>(Kynurenine--oxoglutarate<br>aminotransferase II) (2-aminoadipate<br>transaminase) (EC 2.; n=2; Danio<br>rerio Rep: Kynurenine/alpha-<br>aminoadipate aminotransferase<br>mitochondrial precursor (KAT/AadAT)<br>(Kynurenine--oxoglutarate transaminase<br>II) (EC 2.6.1.7) (Kynurenine<br>aminotransferase II) (Kynurenine--<br>oxoglutarate aminotransferase II) (2-<br>aminoadipate transaminase) (EC 2 -<br>Danio rerio |
| 42804 | -3.97 | 0.17 | 0.0003 | 0.024<br>2 | 0.58 | all_v2.0.9<br>458.C1                     | Unassigned protein<br>DNA (Cytosine-5)-methyltransferase;<br>n=8; Danio rerio Rep: DNA (Cytosine-5)-<br>methyltransferase - Brachydanio rerio<br>(Zebrafish) (Danio rerio)                                                                                                                                                                                                                                                                                                                                                                                                                                                                                                                                                                     |
| 38737 | -3.99 | 0.16 | 0.0002 | 0.024<br>2 | 0.58 | all_v2.0.4<br>631.C1                     | unclassified<br>Thiamine transporter 2 (ThTr-2) (ThTr2)<br>(Solute carrier family 19 member 3).;<br>n=1; Takifugu rubripes Rep: Thiamine<br>transporter 2 (ThTr-2) (ThTr2) (Solute<br>carrier family 19 member 3). - Takifugu<br>rubripes                                                                                                                                                                                                                                                                                                                                                                                                                                                                                                      |
| 46550 | -3.79 | 0.17 | 0.0004 | 0.026<br>7 | 0.58 | sb_gmnbg<br>i_0003o02<br>.pDNRm1<br>3r   | PREDICTED: similar to opioid receptor-<br>like protein Zf-orl; n=1; Monodelphis<br>domestica Rep: PREDICTED: similar to<br>opioid receptor-like protein Zf-orl -<br>Monodelphis domestica<br>DEAD (Asp-Glu-Ala-Asp) box<br>polypeptide 23; n=9; Euteleostomi Rep:<br>DEAD (Asp-Glu-Ala-Asp) box<br>polypeptide 23 - Danio rerio (Zebrafish)<br>(Brachydanio rerio)                                                                                                                                                                                                                                                                                                                                                                             |
| 36879 | -5.15 | 0.13 | 0.0000 | 0.011<br>9 | 0.57 | sb_gmnbh<br>kas_0001i<br>05.pDNR<br>m13r | MHC class I antigene; n=1; Salmo<br>salar Rep: MHC class I antigene - Salmo<br>salar (Atlantic salmon)                                                                                                                                                                                                                                                                                                                                                                                                                                                                                                                                                                                                                                         |
| 53580 | -4.40 | 0.17 | 0.0001 | 0.019<br>6 | 0.56 | all_v2.0.1<br>5396.C2                    | Zgc:113227; n=2; Danio rerio Rep:<br>Zgc:113227 - Danio rerio (Zebrafish)<br>(Brachydanio rerio)                                                                                                                                                                                                                                                                                                                                                                                                                                                                                                                                                                                                                                               |
| 42531 | -5.58 | 0.12 | 0.0000 | 0.009<br>9 | 0.56 | sb_gmnbp<br>cic_0010g<br>10.pDNR<br>m13r | non-directed                                                                                                                                                                                                                                                                                                                                                                                                                                                                                                                                                                                                                                                                                                                                   |
| 40754 | -4.78 | 0.16 | 0.0001 | 0.014<br>5 | 0.54 | all_v2.0.1<br>6046.C1                    |                                                                                                                                                                                                                                                                                                                                                                                                                                                                                                                                                                                                                                                                                                                                                |
| 36813 | -4.21 | 0.18 | 0.0002 | 0.020<br>7 | 0.54 | sb_gmapt<br>e_0005h1<br>1.pDNR<br>2      |                                                                                                                                                                                                                                                                                                                                                                                                                                                                                                                                                                                                                                                                                                                                                |
| 39044 | -4.73 | 0.16 | 0.0001 | 0.015<br>0 | 0.53 | all_v2.0.1<br>284.C13                    |                                                                                                                                                                                                                                                                                                                                                                                                                                                                                                                                                                                                                                                                                                                                                |
| 43544 | -5.13 | 0.16 | 0.0000 | 0.011<br>9 | 0.52 | all_v2.0.8<br>240.C1                     |                                                                                                                                                                                                                                                                                                                                                                                                                                                                                                                                                                                                                                                                                                                                                |
| 45721 | -5.08 | 0.16 | 0.0000 | 0.012      | 0.52 | all_v2.0.1                               |                                                                                                                                                                                                                                                                                                                                                                                                                                                                                                                                                                                                                                                                                                                                                |

|       |       |      |        |            |      |                                          |                                                                                                                                                                                                                                                                                                                                                                             |
|-------|-------|------|--------|------------|------|------------------------------------------|-----------------------------------------------------------------------------------------------------------------------------------------------------------------------------------------------------------------------------------------------------------------------------------------------------------------------------------------------------------------------------|
|       |       |      |        | 8          |      | 1198.C1.a                                |                                                                                                                                                                                                                                                                                                                                                                             |
| 45419 | -4.57 | 0.17 | 0.0001 | 0.017<br>2 | 0.52 | sb_gmapo<br>v_0021e2<br>0.pDNR<br>2      | MGC52541; similar to nucleoporin<br>214kDa<br>Zgc:73143; n=2; Danio rerio Rep:<br>Zgc:73143 - Danio rerio (Zebrafish)<br>(Brachydanio rerio)                                                                                                                                                                                                                                |
| 43930 | -4.07 | 0.22 | 0.0002 | 0.022<br>8 | 0.51 | all_v2.0.8<br>26.C1                      | Novel protein containing an Acyl-CoA<br>dehydrogenase, N-terminal and C-<br>terminal domain; n=2; Danio rerio Rep:<br>Novel protein containing an Acyl-CoA<br>dehydrogenase, N-terminal and C-<br>terminal domain - Brachydanio rerio<br>(Zebrafish) (Danio rerio)                                                                                                          |
| 39391 | -4.33 | 0.21 | 0.0001 | 0.020<br>4 | 0.51 | sb_gmnbh<br>kic_0003n<br>12.pDNR<br>F2   | PREDICTED: similar to transposase;<br>n=1; Danio rerio Rep: PREDICTED:<br>similar to transposase - Danio rerio<br>NADH dehydrogenase [ubiquinone] 1<br>alpha subcomplex subunit 1; n=4;<br>Murinae Rep: NADH dehydrogenase<br>[ubiquinone] 1 alpha subcomplex subunit<br>1 - Mus musculus (Mouse)                                                                           |
| 41106 | -7.42 | 0.10 | 0.0000 | 0.003<br>5 | 0.51 | sb_gmnbp<br>cic_0004a<br>22.pDNR<br>F2   | unclassified<br>Goose-type lysozyme 2; n=1; Gadus<br>morhua Rep: Goose-type lysozyme 2 -<br>Gadus morhua (Atlantic cod)<br>CCAAT/enhancer binding protein alpha;<br>n=1; Oncorhynchus mykiss Rep:<br>CCAAT/enhancer binding protein alpha -<br>Oncorhynchus mykiss (Rainbow trout)<br>(Salmo gairdneri)                                                                     |
| 39253 | -4.05 | 0.23 | 0.0002 | 0.023<br>0 | 0.50 | all_v2.0.6<br>799.C1                     | Unassigned protein                                                                                                                                                                                                                                                                                                                                                          |
| 54733 | -4.83 | 0.20 | 0.0000 | 0.013<br>8 | 0.48 | all_v2.0.1<br>3534.C1                    | unclassified                                                                                                                                                                                                                                                                                                                                                                |
| 37456 | -3.85 | 0.27 | 0.0003 | 0.025<br>7 | 0.47 | all_v2.0.9<br>3.C1                       | unclassified                                                                                                                                                                                                                                                                                                                                                                |
| 36388 | -5.75 | 0.17 | 0.0000 | 0.009<br>9 | 0.47 | sb_gmnbli<br>ts_0034k0<br>9.pDNR<br>2    | IGHG1; similar to Ig gamma-1 chain C<br>region<br>Disabled homolog 2-interacting protein<br>(DAB2-interacting protein) (DAB2<br>interaction protein) (ASK-interacting<br>protein 1).; n=1; Takifugu rubripes Rep:<br>Disabled homolog 2-interacting protein<br>(DAB2-interacting protein) (DAB2<br>interaction protein) (ASK-interacting<br>protein 1). - Takifugu rubripes |
| 48182 | -4.32 | 0.24 | 0.0001 | 0.020<br>4 | 0.46 | sb_gmnlla<br>_0020p21.<br>t7             | unclassified                                                                                                                                                                                                                                                                                                                                                                |
| 52342 | -3.71 | 0.28 | 0.0004 | 0.027<br>4 | 0.46 | all_v2.0.8<br>78.C1                      | unclassified                                                                                                                                                                                                                                                                                                                                                                |
| 44918 | -4.32 | 0.23 | 0.0001 | 0.020<br>4 | 0.45 | all_v2.0.5<br>891.C6                     | unclassified                                                                                                                                                                                                                                                                                                                                                                |
| 36870 | -4.58 | 0.23 | 0.0001 | 0.017<br>2 | 0.44 | all_v2.0.1<br>5702.C1                    | unclassified                                                                                                                                                                                                                                                                                                                                                                |
| 54419 | -4.65 | 0.28 | 0.0001 | 0.016<br>1 | 0.39 | all_v2.0.4<br>355.C1                     | unclassified                                                                                                                                                                                                                                                                                                                                                                |
| 52981 | -3.79 | 0.40 | 0.0004 | 0.026<br>7 | 0.36 | all_v2.0.1<br>0153.C1                    | unclassified                                                                                                                                                                                                                                                                                                                                                                |
| 46563 | -4.88 | 0.31 | 0.0000 | 0.013<br>5 | 0.31 | sb_gmnls<br>kic_0009n<br>01.pDNR<br>m13r | Unassigned protein                                                                                                                                                                                                                                                                                                                                                          |
| 55182 | -7.65 | 0.21 | 0.0000 | 0.003<br>5 | 0.27 | all_v2.0.1<br>1630.C1                    | unclassified                                                                                                                                                                                                                                                                                                                                                                |
| 43331 | -5.49 | 0.31 | 0.0000 | 0.009<br>9 | 0.27 | sb_gmnbs<br>pic_0015g<br>05.pDNR         | Zgc:101729; n=3; Danio rerio Rep:<br>Zgc:101729 - Danio rerio (Zebrafish)<br>(Brachydanio rerio)                                                                                                                                                                                                                                                                            |

|       |       |      |        |       |      |            |                                                                                                                                                                                  |
|-------|-------|------|--------|-------|------|------------|----------------------------------------------------------------------------------------------------------------------------------------------------------------------------------|
|       |       |      |        |       |      | F2         | PREDICTED: similar to Pre-mRNA processing splicing factor 8 (Splicing factor Prp8) (PRP8 homolog) (220 kDa U5 snRNP-specific protein) (p220) isoform 13; n=4; Deuterostomia Rep: |
|       |       |      |        | 0.025 |      | sb_gmnbs   | PREDICTED: similar to Pre-mRNA processing splicing factor 8 (Splicing factor Prp8) (PRP8 homolog) (220 kDa                                                                       |
|       |       |      |        | 6     | 0.20 | pic_0014p  | U5 snRNP-specific protein) (p220)                                                                                                                                                |
| 40869 | -3.88 | 0.51 | 0.0003 |       |      | 07.pDNR    | PREDICTED: similar to Pre-mRNA processing splicing factor 8 (Splicing factor Prp8) (PRP8 homolog) (220 kDa                                                                       |
|       |       |      |        |       |      | F2         | U5 snRNP-specific protein) (p220) isoform 13 - Canis familiaris                                                                                                                  |
|       |       |      |        | 0.013 |      |            | Ambpl protein; n=5; Danio rerio Rep:                                                                                                                                             |
| 35888 | -4.88 | 0.44 | 0.0000 | 5     | 0.18 | all_v2.0.5 | Ambpl protein - Danio rerio (Zebrafish)                                                                                                                                          |
|       |       |      |        |       |      | 134.C1     | (Brachydanio rerio)                                                                                                                                                              |

<sup>a</sup>Fold-changes are presented as outputted by siggenes and were calculated as pIC/PBS

Supplemental Table S7. 290 Genes differentially expressed between fish injected with pIC at 10°C and 16°C and sampled at 6HPI

| Probe Id | d-value | Stddev | Raw p  | q-value | Fold Change <sup>a</sup> | Sequence Name            | Gene Name                                                                                            |
|----------|---------|--------|--------|---------|--------------------------|--------------------------|------------------------------------------------------------------------------------------------------|
| 38356    | 6.07    | 0.50   | 0.0000 | 0.0026  | 11.14                    | all_v2.0.415.C6          | Homolog of Homo sapiens Spastic ataxia of Charlevoix-Saguenay; n=1; Takifugu rubripes                |
| 38613    | 4.40    | 0.57   | 0.0002 | 0.0092  | 8.45                     | all_v2.0.14.CB5          | Interferon stimulated gene 15; n=1; Gadus morhua                                                     |
| 38354    | 8.79    | 0.31   | 0.0000 | 0.0016  | 8.02                     | all_v2.0.707.C4          | Homolog of Homo sapiens Spastic ataxia of Charlevoix-Saguenay; n=1; Takifugu rubripes                |
| 38638    | 5.85    | 0.44   | 0.0000 | 0.0026  | 7.90                     | all_v2.0.638.C1          | Interleukin-8 variant 2; n=3; Ictalurus punctatus                                                    |
| 47384    | 7.35    | 0.37   | 0.0000 | 0.0019  | 7.71                     | all_v2.0.707.C1          | Unassigned protein                                                                                   |
| 38358    | 7.33    | 0.36   | 0.0000 | 0.0019  | 7.45                     | all_v2.0.9190.C1         | Homolog of Homo sapiens Spastic ataxia of Charlevoix-Saguenay; n=1; Takifugu rubripes                |
| 44448    | 5.66    | 0.44   | 0.0000 | 0.0027  | 7.29                     | CK10ad                   | custom - CC chemokine                                                                                |
| 44453    | 6.42    | 0.39   | 0.0000 | 0.0022  | 7.20                     | CK10a                    | custom - CC chemokine                                                                                |
| 46200    | 8.02    | 0.31   | 0.0000 | 0.0018  | 7.00                     | all_v2.0.14575.C1        | SACS; saccin                                                                                         |
| 47164    | 14.93   | 0.16   | 0.0000 | 0.0016  | 6.72                     | all_v2.0.6027.C6         | Unassigned protein                                                                                   |
| 44590    | 7.90    | 0.33   | 0.0000 | 0.0018  | 6.58                     | DXH4a                    | custom - probable ATP-dependent RNA helicase DHX                                                     |
| 38651    | 4.99    | 0.48   | 0.0001 | 0.0050  | 6.19                     | sb_gmapht_0023a03.pDNRF2 | Intraflagellar transport protein 52; n=4; Danio rerio                                                |
| 47329    | 6.29    | 0.41   | 0.0000 | 0.0024  | 6.13                     | all_v2.0.415.C3          | Unassigned protein                                                                                   |
| 38359    | 8.15    | 0.28   | 0.0000 | 0.0018  | 6.01                     | all_v2.0.415.C5          | Homolog of Homo sapiens Spastic ataxia of Charlevoix-Saguenay; n=1; Takifugu rubripes                |
| 44859    | 7.55    | 0.30   | 0.0000 | 0.0018  | 5.92                     | all_v2.0.314.C1          | HECT domain containing protein                                                                       |
| 38611    | 5.37    | 0.43   | 0.0000 | 0.0035  | 5.90                     | all_v2.0.1767.C1         | Interferon stimulated gene 15; n=1; Gadus morhua                                                     |
| 38639    | 5.20    | 0.42   | 0.0000 | 0.0041  | 5.88                     | all_v2.0.638.CB1         | Interleukin-8 variant 2; n=3; Ictalurus punctatus                                                    |
| 38357    | 9.36    | 0.24   | 0.0000 | 0.0016  | 5.70                     | all_v2.0.8243.C1         | Homolog of Homo sapiens Spastic ataxia of Charlevoix-Saguenay; n=1; Takifugu rubripes                |
| 46226    | 6.75    | 0.34   | 0.0000 | 0.0022  | 5.68                     | all_v2.0.415.C1          | Serpentine_recp domain containing protein                                                            |
| 38604    | 7.28    | 0.32   | 0.0000 | 0.0019  | 5.62                     | all_v2.0.14.CB2          | Interferon stimulated gene 15; n=1; Gadus morhua                                                     |
| 41316    | 9.24    | 0.25   | 0.0000 | 0.0016  | 5.61                     | all_v2.0.1009.C5         | Probable ATP-dependent helicase LGP2 (EC 3.6.1.-) (Protein D11Lgp2 homolog.); n=1; Takifugu rubripes |
| 38605    | 5.94    | 0.39   | 0.0000 | 0.0026  | 5.58                     | all_v2.0.14.C13          | Interferon stimulated gene 15; n=1; Gadus morhua                                                     |
| 41269    | 9.53    | 0.24   | 0.0000 | 0.0016  | 5.56                     | sb_gmnlbfc_0004o20.t7    | PREDICTED: similar to zinc finger, NFX1-type containing 1; n=3; Laurasiatheria                       |
| 43201    | 6.42    | 0.34   | 0.0000 | 0.0022  | 5.43                     | all_v2.0.9330.C1         | Viperin-like protein; n=1; Channa argus                                                              |
| 44180    | 8.24    | 0.26   | 0.0000 | 0.0018  | 5.24                     | all_v2.0.1266.C1         | ZPC4; n=2; Oryzias latipes                                                                           |
| 38606    | 5.56    | 0.39   | 0.0000 | 0.0029  | 5.20                     | all_v2.0.14.CB4          | Interferon stimulated gene 15; n=1; Gadus morhua                                                     |
| 44589    | 8.33    | 0.26   | 0.0000 | 0.0018  | 5.06                     | DXH3b                    | custom - probable ATP-dependent RNA helicase DHX                                                     |
| 38608    | 6.30    | 0.33   | 0.0000 | 0.0024  | 4.80                     | all_v2.0.14.C12          | Interferon stimulated gene 15; n=1; Gadus morhua                                                     |
| 38609    | 5.45    | 0.38   | 0.0000 | 0.0032  | 4.67                     | all_v2.0.14.C3           | Interferon stimulated gene 15; n=1; Gadus morhua                                                     |
| 46199    | 8.81    | 0.22   | 0.0000 | 0.0016  | 4.51                     | all_v2.0.2412.C1         | SACS; saccin                                                                                         |
| 53704    | 5.66    | 0.38   | 0.0000 | 0.0027  | 4.34                     | all_v2.0.1006.C1         | unclassified                                                                                         |



|       |      |      |        |        |      |                                    |                                                                                                                                                                                                             |
|-------|------|------|--------|--------|------|------------------------------------|-------------------------------------------------------------------------------------------------------------------------------------------------------------------------------------------------------------|
| 46202 | 6.71 | 0.28 | 0.0000 | 0.0022 | 4.24 | sb_gmnbmd_00<br>10a21.pDNRM1<br>3r | Sacs_predicted; saccin (predicted)                                                                                                                                                                          |
| 44464 | 5.57 | 0.31 | 0.0000 | 0.0028 | 3.86 | CK10add                            | custom - CC chemokine                                                                                                                                                                                       |
| 38614 | 6.34 | 0.28 | 0.0000 | 0.0023 | 3.81 | all_v2.0.7062.C<br>2               | Interferon stimulated gene 15; n=1; Gadus<br>morhua<br>LOC797694; similar to solute carrier family<br>25 member 5 protein                                                                                   |
| 45361 | 5.47 | 0.31 | 0.0000 | 0.0032 | 3.78 | all_v2.0.34.C2                     | Interferon stimulated gene 15; n=1; Gadus<br>morhua                                                                                                                                                         |
| 38603 | 5.09 | 0.34 | 0.0001 | 0.0046 | 3.77 | all_v2.0.14.CB7                    | Probable ATP-dependent helicase LGP2 (EC<br>3.6.1.-) (Protein D11Lgp2 homolog).; n=1;<br>Takifugu rubripes                                                                                                  |
| 41314 | 5.78 | 0.30 | 0.0000 | 0.0027 | 3.77 | all_v2.0.5598.C<br>1               | Interferon stimulated gene 15; n=1; Gadus<br>morhua                                                                                                                                                         |
| 38612 | 5.77 | 0.31 | 0.0000 | 0.0027 | 3.76 | all_v2.0.14.CB3                    | custom - probable ATP-dependent RNA<br>helicase DHX                                                                                                                                                         |
| 44588 | 8.54 | 0.20 | 0.0000 | 0.0018 | 3.73 | DXH2b                              | Unassigned protein                                                                                                                                                                                          |
| 47156 | 6.73 | 0.27 | 0.0000 | 0.0022 | 3.66 | all_v2.0.617.C5                    | custom - probable ATP-dependent RNA<br>helicase DHX                                                                                                                                                         |
| 44584 | 9.44 | 0.17 | 0.0000 | 0.0016 | 3.55 | DXH1a                              | Unassigned protein                                                                                                                                                                                          |
| 36525 | 3.73 | 0.40 | 0.0007 | 0.0203 | 3.53 | all_v2.0.16620.<br>C1              | Claudin 30; n=1; Oreochromis mossambicus                                                                                                                                                                    |
| 55502 | 4.24 | 0.37 | 0.0002 | 0.0111 | 3.43 | all_v2.0.7892.C<br>1               | zgc:110548; zgc:110548                                                                                                                                                                                      |
| 43196 | 5.76 | 0.28 | 0.0000 | 0.0027 | 3.35 | all_v2.0.3448.C<br>3               | VHSV-induced protein; n=1; Oncorhynchus<br>mykiss                                                                                                                                                           |
| 37299 | 4.28 | 0.33 | 0.0002 | 0.0105 | 3.19 | all_v2.0.3679.C<br>1               | Gadd45al protein; n=2; Danio rerio                                                                                                                                                                          |
| 52069 | 4.96 | 0.30 | 0.0001 | 0.0051 | 3.13 | all_v2.0.6954.C<br>2               | unclassified                                                                                                                                                                                                |
| 43197 | 4.86 | 0.33 | 0.0001 | 0.0054 | 3.13 | all_v2.0.3448.C<br>4               | VHSV-induced protein; n=1; Oncorhynchus<br>mykiss                                                                                                                                                           |
| 44624 | 5.17 | 0.27 | 0.0000 | 0.0043 | 3.03 | Codviperin1                        | custom - viperin                                                                                                                                                                                            |
| 54090 | 7.69 | 0.18 | 0.0000 | 0.0018 | 3.02 | all_v2.0.2294.C<br>1               | unclassified                                                                                                                                                                                                |
| 42073 | 4.44 | 0.30 | 0.0002 | 0.0088 | 2.93 | all_v2.0.15254.<br>C1              | Serine hydrolase-like protein 2 (EC 3.1.-.-);<br>n=1; Takifugu rubripes                                                                                                                                     |
| 38617 | 4.03 | 0.34 | 0.0004 | 0.0137 | 2.80 | all_v2.0.13188.<br>C1              | Interferon-inducible GTPase 5 (EC 3.6.5.-)<br>(Immunity-related GTPase cinema 1).; n=3;<br>Takifugu rubripes<br>Homolog of Homo sapiens Spastic ataxia of<br>Charlevoix-Saguenay; n=1; Takifugu<br>rubripes |
| 38353 | 5.85 | 0.22 | 0.0000 | 0.0026 | 2.78 | all_v2.0.415.C2                    | unclassified                                                                                                                                                                                                |
| 41829 | 6.48 | 0.21 | 0.0000 | 0.0022 | 2.77 | sb_gmnblits_00<br>18p08.pDNRF2     | RFK protein; n=2; Bos taurus                                                                                                                                                                                |
| 55096 | 3.54 | 0.37 | 0.0010 | 0.0260 | 2.76 | all_v2.0.1736.C<br>2               | unclassified<br>custom - probable ATP-dependent RNA<br>helicase DHX                                                                                                                                         |
| 44591 | 7.02 | 0.19 | 0.0000 | 0.0021 | 2.74 | DXH4b                              | RING finger protein 213; n=3; Homo<br>sapiens                                                                                                                                                               |
| 41942 | 6.23 | 0.21 | 0.0000 | 0.0025 | 2.73 | all_v2.0.8660.C<br>1               | Unassigned protein                                                                                                                                                                                          |
| 48258 | 5.72 | 0.23 | 0.0000 | 0.0027 | 2.72 | all_v2.0.14926.<br>C1              | NFX1-type zinc finger-containing protein 1;<br>n=5; Eutheria                                                                                                                                                |
| 39328 | 3.94 | 0.38 | 0.0004 | 0.0152 | 2.67 | all_v2.0.2213.C<br>1               | K14 protein; n=1; Xenopus laevis                                                                                                                                                                            |
| 38695 | 4.62 | 0.27 | 0.0001 | 0.0070 | 2.66 | all_v2.0.7632.C<br>1               | PRP4 pre-mRNA processing factor 4<br>homolog; n=2; Danio rerio                                                                                                                                              |
| 41595 | 5.75 | 0.22 | 0.0000 | 0.0027 | 2.65 | sb_gmapov_002<br>8122.pDNRF2       | Probable ATP-dependent helicase LGP2 (EC<br>3.6.1.-) (Protein D11Lgp2 homolog).; n=1;<br>Takifugu rubripes                                                                                                  |
| 41313 | 5.47 | 0.23 | 0.0000 | 0.0032 | 2.58 | all_v2.0.1009.C<br>1               | custom - probable ATP-dependent RNA<br>helicase DHX                                                                                                                                                         |
| 44585 | 5.72 | 0.22 | 0.0000 | 0.0027 | 2.56 | DXH2a                              | unclassified                                                                                                                                                                                                |
| 49575 | 4.44 | 0.26 | 0.0002 | 0.0088 | 2.52 | all_v2.0.3263.C<br>1               | Homolog of Gallus gallus Double-stranded<br>RNA-activated protein kinase.; n=1;<br>Takifugu rubripes                                                                                                        |
| 37904 | 7.33 | 0.16 | 0.0000 | 0.0019 | 2.52 | sb_gmnbrts_0<br>003k13.pDNRF<br>2  |                                                                                                                                                                                                             |

|       |      |      |        |        |      |                                    |                                                                                                                                                                          |
|-------|------|------|--------|--------|------|------------------------------------|--------------------------------------------------------------------------------------------------------------------------------------------------------------------------|
| 41027 | 4.84 | 0.26 | 0.0001 | 0.0055 | 2.50 | sb_gmlbgits_00<br>04k02.sp6        | PREDICTED: similar to SPAC167.01; n=1;<br>Danio rerio                                                                                                                    |
| 44546 | 4.86 | 0.23 | 0.0001 | 0.0054 | 2.48 | IRF10K4                            | custom - Interferon regulatory factor 10K                                                                                                                                |
| 51382 | 4.16 | 0.27 | 0.0003 | 0.0119 | 2.48 | all_v2.0.5897.C<br>3               | unclassified                                                                                                                                                             |
| 41582 | 3.89 | 0.30 | 0.0005 | 0.0168 | 2.47 | all_v2.0.10019.<br>C1              | Protocadherin 2G25; n=1; Takifugu rubripes                                                                                                                               |
| 39291 | 7.23 | 0.16 | 0.0000 | 0.0019 | 2.46 | sb_gmnbm_00<br>14b24.pDNRF2        | Nebulin.; n=1; Takifugu rubripes                                                                                                                                         |
| 44336 | 8.19 | 0.13 | 0.0000 | 0.0018 | 2.44 | sb_gmapht_003<br>7b08.pDNRF2       | bloodthirsty [Notothenia coriiceps]                                                                                                                                      |
| 39490 | 5.18 | 0.22 | 0.0000 | 0.0042 | 2.44 | all_v2.0.5879.C<br>2               | Novel protein similar to vertebrate nebulin;<br>n=3; Danio rerio                                                                                                         |
| 44375 | 3.81 | 0.29 | 0.0006 | 0.0184 | 2.44 | all_v2.0.16663.<br>C1              | cct5; chaperonin containing TCP1, subunit 5<br>(epsilon); K09497 T-complex protein 1<br>subunit epsilon                                                                  |
| 38598 | 4.58 | 0.25 | 0.0001 | 0.0072 | 2.43 | all_v2.0.1580.C<br>7               | Interferon regulatory factor 1; n=1; Channa<br>argus                                                                                                                     |
| 38285 | 6.29 | 0.18 | 0.0000 | 0.0025 | 2.41 | sb_gmnlbfc_00<br>07k16.t7          | Homolog of Homo sapiens Probable ATP-<br>dependent helicase LGP2; n=1; Takifugu<br>rubripes                                                                              |
| 55231 | 4.35 | 0.25 | 0.0002 | 0.0098 | 2.39 | all_v2.0.8766.C<br>1               | unclassified                                                                                                                                                             |
| 41940 | 4.48 | 0.25 | 0.0001 | 0.0085 | 2.36 | sb_gmnbspic_0<br>015c08.pDNRF<br>2 | RING finger protein 213.; n=1; Gallus gallus                                                                                                                             |
| 48479 | 3.84 | 0.32 | 0.0005 | 0.0177 | 2.34 | all_v2.0.6321.C<br>4               | Unassigned protein                                                                                                                                                       |
| 38352 | 3.99 | 0.27 | 0.0004 | 0.0142 | 2.34 | all_v2.0.272.C2                    | Homolog of Homo sapiens SOUL protein;<br>n=1; Takifugu rubripes                                                                                                          |
| 54933 | 4.08 | 0.27 | 0.0003 | 0.0128 | 2.33 | all_v2.0.5297.C<br>2               | unclassified                                                                                                                                                             |
| 44543 | 4.15 | 0.26 | 0.0003 | 0.0119 | 2.32 | IRF10K1                            | custom - Interferon regulatory factor 10K                                                                                                                                |
| 51171 | 3.63 | 0.35 | 0.0008 | 0.0230 | 2.32 | all_v2.0.12475.<br>C1              | unclassified                                                                                                                                                             |
| 49387 | 3.58 | 0.32 | 0.0009 | 0.0243 | 2.31 | all_v2.0.12515.<br>C1              | unclassified                                                                                                                                                             |
| 38260 | 4.86 | 0.21 | 0.0001 | 0.0054 | 2.28 | all_v2.0.16638.<br>C1              | Homolog of Homo sapiens PhosPholiPase<br>C-like 3; n=1; Takifugu rubripes                                                                                                |
| 41418 | 3.86 | 0.26 | 0.0005 | 0.0174 | 2.26 | all_v2.0.659.C1                    | Proteasome subunit alpha type; n=8;<br>Euteleostomi                                                                                                                      |
| 37059 | 3.76 | 0.27 | 0.0006 | 0.0197 | 2.26 | all_v2.0.420.C2                    | Ependymin; n=1; Perca flavescens                                                                                                                                         |
| 54821 | 4.62 | 0.22 | 0.0001 | 0.0070 | 2.24 | all_v2.0.10668.<br>C2              | unclassified                                                                                                                                                             |
| 45325 | 5.62 | 0.18 | 0.0000 | 0.0027 | 2.23 | all_v2.0.14677.<br>C1              | LOC764254; similar to transposase                                                                                                                                        |
| 38552 | 4.73 | 0.22 | 0.0001 | 0.0063 | 2.21 | all_v2.0.10046.<br>C1              | ilvB (bacterial acetolactate synthase)-like;<br>n=1; Takifugu rubripes                                                                                                   |
| 54239 | 4.05 | 0.24 | 0.0003 | 0.0134 | 2.19 | all_v2.0.11344.<br>C1              | unclassified                                                                                                                                                             |
| 51636 | 6.72 | 0.15 | 0.0000 | 0.0022 | 2.19 | all_v2.0.1410.C<br>1               | unclassified                                                                                                                                                             |
| 40489 | 4.51 | 0.22 | 0.0001 | 0.0080 | 2.18 | sb_gmnbb_000<br>3e16.pDNRF2        | PREDICTED: similar to G protein-coupled<br>receptor 97; n=2; Canis familiaris<br>Homolog of Homo sapiens<br>Deoxyribonuclease gamma precursor; n=1;<br>Takifugu rubripes |
| 38042 | 6.36 | 0.15 | 0.0000 | 0.0022 | 2.18 | all_v2.0.894.C5                    | Bloodthirsty; n=2; Notothenioidei                                                                                                                                        |
| 36186 | 5.21 | 0.19 | 0.0000 | 0.0041 | 2.17 | all_v2.0.661.C2                    | NFX1-type zinc finger-containing protein 1.;<br>n=1; Takifugu rubripes                                                                                                   |
| 39326 | 4.33 | 0.23 | 0.0002 | 0.0099 | 2.17 | all_v2.0.9595.C<br>1               | unclassified                                                                                                                                                             |
| 38655 | 4.74 | 0.20 | 0.0001 | 0.0063 | 2.15 | all_v2.0.1909.C<br>3               | IRF7; n=1; Siniperca chuatsi                                                                                                                                             |
| 43192 | 4.82 | 0.21 | 0.0001 | 0.0057 | 2.15 | sb_gmnlbric_00<br>06j07.t7         | Vesicular glutamate transporter 2.2; n=3;<br>Danio rerio                                                                                                                 |
| 53852 | 7.37 | 0.12 | 0.0000 | 0.0019 | 2.13 | all_v2.0.6339.C<br>1               | unclassified                                                                                                                                                             |
| 36195 | 5.65 | 0.16 | 0.0000 | 0.0027 | 2.11 | sb_gmnlbfc_00<br>07a23.t7          | Bloodthirsty; n=2; Notothenioidei                                                                                                                                        |

|       |      |      |        |        |      |                            |                                                                                                                     |
|-------|------|------|--------|--------|------|----------------------------|---------------------------------------------------------------------------------------------------------------------|
| 38094 | 4.12 | 0.24 | 0.0003 | 0.0123 | 2.11 | sb_gmnbhkc_005c22.pDNRF2   | Homolog of Homo sapiens HECT domain and RCC1-like domain protein 3; n=1; Takifugu rubripes                          |
| 40216 | 4.68 | 0.21 | 0.0001 | 0.0067 | 2.10 | sb_gmapte_0010k12.pDNRM13r | PREDICTED: similar to ankyrin 2, neuronal; n=1; Danio rerio                                                         |
| 44283 | 4.87 | 0.19 | 0.0001 | 0.0054 | 2.10 | sb_gmnlmfta_0004i04.t7     | ARL6IP6; ADP-ribosylation-like factor 6 interacting protein 6                                                       |
| 38607 | 3.82 | 0.24 | 0.0005 | 0.0181 | 2.10 | all_v2.0.7062.C1           | Interferon stimulated gene 15; n=1; Gadus morhua                                                                    |
| 37060 | 4.84 | 0.20 | 0.0001 | 0.0055 | 2.09 | sb_gmnlsras_0003k23.t7     | Eph-like receptor tyrosine kinase rtk5; n=4; Danio rerio                                                            |
| 41014 | 5.62 | 0.17 | 0.0000 | 0.0027 | 2.08 | all_v2.0.14158.C1          | PREDICTED: similar to Snf2-related CBP activator protein; n=1; Mus musculus                                         |
| 43007 | 4.92 | 0.20 | 0.0001 | 0.0051 | 2.08 | sb_gmapov_0013f18.pDNRF2   | UPI000065EC34 related cluster; n=1; Takifugu rubripes                                                               |
| 40846 | 4.00 | 0.24 | 0.0004 | 0.0142 | 2.07 | all_v2.0.4119.C1           | PREDICTED: similar to Poly [ADP-ribose] polymerase 14 (PARP-14) (B aggressive lymphoma protein 2); n=1; Danio rerio |
| 36311 | 4.67 | 0.20 | 0.0001 | 0.0067 | 2.05 | all_v2.0.12206.C1          | Cardiac troponin T; n=14; Danio rerio                                                                               |
| 36190 | 5.60 | 0.16 | 0.0000 | 0.0028 | 2.05 | sb_gmapht_0014i15.pDNRF2   | Bloodthirsty; n=2; Notothenioidei                                                                                   |
| 54421 | 5.26 | 0.17 | 0.0000 | 0.0041 | 2.04 | all_v2.0.1129.C1           | unclassified                                                                                                        |
| 41103 | 5.65 | 0.16 | 0.0000 | 0.0027 | 2.04 | sb_gmnbhkc_0006n17.pDNRF2  | PREDICTED: similar to transposase, partial; n=1; Strongylocentrotus purpuratus                                      |
| 44587 | 4.95 | 0.18 | 0.0001 | 0.0051 | 2.04 | DXH3a                      | custom - probable ATP-dependent RNA helicase DHX                                                                    |
| 40019 | 4.72 | 0.19 | 0.0001 | 0.0063 | 2.03 | sb_gmnbhkas_0006d14.pDNRF2 | Pol polyprotein; n=2; Walleye epidermal hyperplasia virus 2                                                         |
| 55269 | 5.32 | 0.16 | 0.0000 | 0.0037 | 2.03 | all_v2.0.9958.C1           | unclassified                                                                                                        |
| 38171 | 3.66 | 0.25 | 0.0008 | 0.0222 | 2.03 | all_v2.0.4661.C1           | Homolog of Homo sapiens Microtubule-associated protein 2 isoform 3; n=1; Takifugu rubripes                          |
| 46586 | 3.48 | 0.25 | 0.0011 | 0.0278 | 2.02 | sb_gmnlem_0013j07.sp6      | Unassigned protein                                                                                                  |
| 47806 | 3.60 | 0.26 | 0.0009 | 0.0243 | 2.02 | sb_gmnsl1_0001h03.pDNRF2   | Unassigned protein                                                                                                  |
| 47020 | 4.54 | 0.20 | 0.0001 | 0.0077 | 2.02 | all_v2.0.526.C2            | Unassigned protein                                                                                                  |
| 36185 | 4.72 | 0.19 | 0.0001 | 0.0063 | 2.01 | all_v2.0.661.C20           | Bloodthirsty; n=2; Notothenioidei                                                                                   |
| 44586 | 5.49 | 0.16 | 0.0000 | 0.0031 | 2.00 | DXH1b                      | custom - probable ATP-dependent RNA helicase DHX                                                                    |
| 42842 | 6.12 | 0.14 | 0.0000 | 0.0026 | 2.00 | sb_gmnlmfta_0005n11.t7     | Twinfilin-2; n=2; Danio rerio                                                                                       |
| 38670 | 4.95 | 0.18 | 0.0001 | 0.0051 | 2.00 | all_v2.0.3891.C1           | Isoform 2 of Q5RI56 ; n=2; Danio rerio                                                                              |
| 39662 | 4.30 | 0.20 | 0.0002 | 0.0102 | 1.99 | all_v2.0.6694.C2           | Novel protein; n=3; Danio rerio                                                                                     |
| 55314 | 4.48 | 0.19 | 0.0001 | 0.0085 | 1.98 | all_v2.0.4690.C2           | unclassified                                                                                                        |
| 55171 | 7.43 | 0.11 | 0.0000 | 0.0019 | 1.97 | all_v2.0.14663.C1          | unclassified                                                                                                        |
| 39325 | 5.47 | 0.16 | 0.0000 | 0.0032 | 1.96 | all_v2.0.9595.C2           | NFX1-type zinc finger-containing protein 1.; n=1; Takifugu rubripes                                                 |
| 49072 | 3.47 | 0.25 | 0.0012 | 0.0285 | 1.96 | all_v2.0.16355.C1          | unclassified                                                                                                        |
| 45046 | 5.05 | 0.16 | 0.0001 | 0.0047 | 1.95 | sb_gmapht_0020j08.pDNRF2   | LOC420518; similar to putative tyrosine phosphatase                                                                 |
| 38154 | 3.74 | 0.22 | 0.0006 | 0.0202 | 1.95 | all_v2.0.420.C1            | Homolog of Homo sapiens Mammalian ependymin related protein-1 precursor; n=1; Takifugu rubripes                     |
| 41096 | 3.55 | 0.23 | 0.0010 | 0.0256 | 1.94 | all_v2.0.1554.C7           | PREDICTED: similar to transposase (putative); n=1; Danio rerio                                                      |
| 54507 | 4.19 | 0.20 | 0.0003 | 0.0116 | 1.93 | all_v2.0.6751.C1           | unclassified                                                                                                        |

|       |      |      |        |        |      |                                 |                                                                                                      |
|-------|------|------|--------|--------|------|---------------------------------|------------------------------------------------------------------------------------------------------|
| 40670 | 4.80 | 0.17 | 0.0001 | 0.0058 | 1.93 | all_v2.0.14446.C1               | PREDICTED: similar to mitochondrial carrier triple repeat 6; n=1; Monodelphis domestica              |
| 41317 | 5.22 | 0.16 | 0.0000 | 0.0041 | 1.92 | all_v2.0.1165.C4                | Probable ATP-dependent helicase LGP2 (EC 3.6.1.-) (Protein D11Lgp2 homolog.); n=1; Takifugu rubripes |
| 36317 | 4.56 | 0.17 | 0.0001 | 0.0074 | 1.92 | all_v2.0.15280.C1               | Carnitine palmitoyltransferase II; n=2; Danio rerio                                                  |
| 46878 | 4.01 | 0.21 | 0.0004 | 0.0142 | 1.92 | sb_gmnbhkc_0007o03.pDNRf2       | Unassigned protein                                                                                   |
| 43876 | 3.70 | 0.22 | 0.0007 | 0.0211 | 1.91 | all_v2.0.1930.C13               | Zgc:63602; n=2; Danio rerio                                                                          |
| 44655 | 6.45 | 0.12 | 0.0000 | 0.0022 | 1.91 | all_v2.0.392.C1                 | DMP1 domain containing protein                                                                       |
| 44396 | 5.45 | 0.15 | 0.0000 | 0.0032 | 1.90 | all_v2.0.6100.C1                | CHCHD5; coiled-coil-helix-coiled-coil-helix domain containing 5                                      |
| 44579 | 4.19 | 0.21 | 0.0003 | 0.0116 | 1.90 | 3MKK4_MAP2K3                    | custom - Mitogen-activated protein kinase kinase 4                                                   |
| 51353 | 3.82 | 0.21 | 0.0005 | 0.0181 | 1.89 | all_v2.0.10898.C1               | unclassified                                                                                         |
| 52706 | 5.69 | 0.13 | 0.0000 | 0.0027 | 1.88 | all_v2.0.17371.C1               | unclassified                                                                                         |
| 37831 | 4.12 | 0.19 | 0.0003 | 0.0123 | 1.87 | sb_gmnlsfas_0002e11.t7          | Homolog of Brachydanio rerio                                                                         |
| 36625 | 8.19 | 0.09 | 0.0000 | 0.0018 | 1.87 | sb_gmnbpcic_0006c06.pDNRm13r    | Transmembrane 9 superfamily member 2.; n=1; Takifugu rubripes                                        |
| 36426 | 5.22 | 0.15 | 0.0000 | 0.0041 | 1.85 | all_v2.0.8306.C2                | Complement component C9; n=1; Paralichthys olivaceus                                                 |
| 43642 | 5.22 | 0.14 | 0.0000 | 0.0041 | 1.84 | all_v2.0.5071.C1                | Cell division cycle 42; n=12; Coelomata                                                              |
| 43012 | 3.84 | 0.19 | 0.0005 | 0.0176 | 1.84 | all_v2.0.9212.C1                | Zgc:152953; n=2; Danio rerio                                                                         |
| 51332 | 4.08 | 0.19 | 0.0003 | 0.0129 | 1.84 | all_v2.0.4629.C1                | UPI0000D8BA1C related cluster; n=1; Danio rerio                                                      |
| 44544 | 3.51 | 0.22 | 0.0011 | 0.0271 | 1.81 | IRF1OK2                         | unclassified                                                                                         |
| 44548 | 4.24 | 0.18 | 0.0002 | 0.0111 | 1.81 | lInterferon_regulatory_factor_7 | custom - Interferon regulatory factor 10K                                                            |
| 46157 | 3.96 | 0.20 | 0.0004 | 0.0151 | 1.80 | sb_gmnbhkas_0009m02.pDNRm13r    | custom - interferon_regulatory_factor_7                                                              |
| 52488 | 5.06 | 0.14 | 0.0001 | 0.0047 | 1.80 | all_v2.0.10916.C1               | RGD1564081_predicted; similar to novel protein similar to human oligophrenin 1 (OPHN1) (predicted)   |
| 55211 | 5.36 | 0.13 | 0.0000 | 0.0035 | 1.78 | all_v2.0.6615.C1                | unclassified                                                                                         |
| 37232 | 3.50 | 0.21 | 0.0011 | 0.0273 | 1.78 | all_v2.0.4884.C1                | unclassified                                                                                         |
| 47613 | 3.77 | 0.20 | 0.0006 | 0.0192 | 1.76 | sb_gmnbb_0013m15.pDNRm13r       | FK506 binding protein 4; n=3; Danio rerio                                                            |
| 46953 | 6.32 | 0.11 | 0.0000 | 0.0024 | 1.76 | sb_gmnbhkc_0007o03.pDNRm13r     | Unassigned protein                                                                                   |
| 39119 | 4.13 | 0.18 | 0.0003 | 0.0123 | 1.75 | all_v2.0.5993.C1                | Unassigned protein                                                                                   |
| 36789 | 4.35 | 0.15 | 0.0002 | 0.0098 | 1.74 | sb_gmnlkfc_0001a07.t7           | Mitochondrial Rho GTPase 1-A; n=1; Danio rerio                                                       |
| 43195 | 4.16 | 0.16 | 0.0003 | 0.0119 | 1.73 | all_v2.0.3448.C1                | Cytosolic nonspecific dipeptidase; n=3; Percomorpha                                                  |
| 47411 | 6.26 | 0.10 | 0.0000 | 0.0025 | 1.72 | sb_gmnlskic_0010i20.pDNRm13r    | VHSV-induced protein; n=1; Oncorhynchus mykiss                                                       |
| 52606 | 4.22 | 0.16 | 0.0002 | 0.0113 | 1.71 | all_v2.0.5996.C2                | Unassigned protein                                                                                   |
| 42585 | 4.06 | 0.17 | 0.0003 | 0.0131 | 1.71 | all_v2.0.2335.C1                | unclassified                                                                                         |
| 38160 | 4.73 | 0.13 | 0.0001 | 0.0063 | 1.71 | sb_gmnlsfc_00                   | Titin a; n=3; Danio rerio                                                                            |
|       |      |      |        |        |      |                                 | Homolog of Homo sapiens Membrane                                                                     |

|       |      |      |        |        |          |                                                                                                                                                                                                                |
|-------|------|------|--------|--------|----------|----------------------------------------------------------------------------------------------------------------------------------------------------------------------------------------------------------------|
|       |      |      |        |        | 03i11.t7 | interacting protein of RGS16; n=1; Takifugu rubripes                                                                                                                                                           |
| 37698 | 4.17 | 0.16 | 0.0003 | 0.0119 | 1.70     | sb_gmnbpcic_001e04.pDNRm13r<br>Homolog of Brachydanio rerio Cyclin L ania-6a.; n=2; Takifugu rubripes                                                                                                          |
| 44547 | 3.95 | 0.16 | 0.0004 | 0.0152 | 1.70     | IRF1OK5<br>custom - Interferon regulatory factor 10K<br>PREDICTED: similar to bloodthirsty; n=3; Danio rerio                                                                                                   |
| 40263 | 6.16 | 0.10 | 0.0000 | 0.0026 | 1.70     | all_v2.0.661.C24<br>RING finger protein 213.; n=1; Gallus gallus                                                                                                                                               |
| 41937 | 4.06 | 0.17 | 0.0003 | 0.0131 | 1.69     | all_v2.0.7491.C2<br>RING finger protein 213.; n=1; Gallus gallus                                                                                                                                               |
| 49782 | 4.87 | 0.13 | 0.0001 | 0.0054 | 1.68     | all_v2.0.17197.C1<br>unclassified<br>Novel protein similar to vertebrate phosphoribosyl pyrophosphate amidotransferase; n=3; Danio rerio                                                                       |
| 39505 | 4.00 | 0.17 | 0.0004 | 0.0142 | 1.68     | sb_gmapov_0018109.pDNRf2<br>Homolog of Homo sapiens Zinc finger CCCH type domain containing protein 1; n=2; Takifugu rubripes                                                                                  |
| 38444 | 3.75 | 0.17 | 0.0006 | 0.0197 | 1.68     | all_v2.0.10457.C1<br>Homolog of Homo sapiens Zinc finger CCCH type domain containing protein 1; n=2; Takifugu rubripes                                                                                         |
| 36189 | 5.73 | 0.11 | 0.0000 | 0.0027 | 1.68     | all_v2.0.661.C31<br>Bloodthirsty; n=2; Notothenioidei                                                                                                                                                          |
| 51450 | 4.47 | 0.15 | 0.0001 | 0.0085 | 1.68     | all_v2.0.12876.C1<br>unclassified                                                                                                                                                                              |
| 40930 | 4.44 | 0.15 | 0.0002 | 0.0088 | 1.67     | sb_gmnbspic_0012b01.pDNRf2<br>PREDICTED: similar to retinoblastoma-associated protein 140; n=2; Canis lupus familiaris                                                                                         |
| 36193 | 3.57 | 0.18 | 0.0009 | 0.0247 | 1.67     | all_v2.0.661.C39<br>Bloodthirsty; n=2; Notothenioidei                                                                                                                                                          |
| 52340 | 4.17 | 0.16 | 0.0003 | 0.0119 | 1.66     | all_v2.0.3337.C1<br>unclassified                                                                                                                                                                               |
| 51059 | 4.00 | 0.15 | 0.0004 | 0.0142 | 1.65     | all_v2.0.690.C5<br>unclassified                                                                                                                                                                                |
| 40018 | 5.74 | 0.10 | 0.0000 | 0.0027 | 1.65     | all_v2.0.7260.C1<br>Pol polyprotein; n=1; Nosema bombycis                                                                                                                                                      |
| 47248 | 3.63 | 0.19 | 0.0008 | 0.0229 | 1.65     | all_v2.0.3503.C1<br>Unassigned protein                                                                                                                                                                         |
| 38619 | 4.12 | 0.14 | 0.0003 | 0.0123 | 1.63     | all_v2.0.3448.C5<br>Interferon-inducible protein Gig1; n=1; Psetta maxima                                                                                                                                      |
| 45146 | 4.97 | 0.12 | 0.0001 | 0.0051 | 1.62     | sb_gmnbhkc_0005i22.pDNRm13r<br>LOC555735; similar to DNA methyltransferase                                                                                                                                     |
| 46309 | 4.75 | 0.12 | 0.0001 | 0.0062 | 1.62     | sb_gmapht_0002g19.pDNRf2<br>TatC domain containing protein                                                                                                                                                     |
| 49141 | 3.59 | 0.17 | 0.0009 | 0.0243 | 1.62     | all_v2.0.14559.C1<br>unclassified<br>LOC501925; similar to solute carrier family 2, member 9 isoform a; K08146 MFS transporter, SP family, solute carrier family 2 (facilitated glucose transporter), member 9 |
| 45123 | 3.51 | 0.17 | 0.0010 | 0.0270 | 1.62     | all_v2.0.13960.C1<br>Homolog of Brachydanio rerio Fem1c.; n=1; Takifugu rubripes                                                                                                                               |
| 37707 | 6.42 | 0.08 | 0.0000 | 0.0022 | 1.62     | sb_gmapov_00029c16.pDNRf2<br>Homolog of Brachydanio rerio Fem1c.; n=1; Takifugu rubripes                                                                                                                       |
| 48214 | 6.41 | 0.09 | 0.0000 | 0.0022 | 1.61     | sb_gmnbhkas_0014f23.pDNRm13r<br>Unassigned protein                                                                                                                                                             |
| 42021 | 3.85 | 0.15 | 0.0005 | 0.0174 | 1.61     | all_v2.0.9962.C1<br>Sdf1a; n=2; Danio rerio                                                                                                                                                                    |
| 49723 | 6.05 | 0.09 | 0.0000 | 0.0026 | 1.60     | all_v2.0.4732.C1<br>unclassified                                                                                                                                                                               |
| 38355 | 4.02 | 0.15 | 0.0004 | 0.0140 | 1.60     | all_v2.0.8243.C2<br>Homolog of Homo sapiens Spastic ataxia of Charlevoix-Saguenay; n=1; Takifugu rubripes                                                                                                      |
| 39626 | 6.12 | 0.09 | 0.0000 | 0.0026 | 1.60     | all_v2.0.4.CB27<br>Novel protein; n=2; Danio rerio                                                                                                                                                             |
| 52780 | 4.07 | 0.14 | 0.0003 | 0.0131 | 1.59     | all_v2.0.4435.C1<br>unclassified                                                                                                                                                                               |
| 41164 | 5.80 | 0.09 | 0.0000 | 0.0027 | 1.59     | sb_gmnbspic_0006i05.pDNRm13r<br>PREDICTED: similar to tubby super-family protein isoform 2; n=2; Monodelphis domestica                                                                                         |
| 43017 | 3.45 | 0.17 | 0.0012 | 0.0291 | 1.59     | sb_gmnbmd_0011m22.pDNRf2<br>UPI0000D8BB84 related cluster; n=3; Danio rerio                                                                                                                                    |

|       |      |      |        |        |      |                                    |                                                                                                                                                                                                       |
|-------|------|------|--------|--------|------|------------------------------------|-------------------------------------------------------------------------------------------------------------------------------------------------------------------------------------------------------|
| 47445 | 3.68 | 0.15 | 0.0007 | 0.0217 | 1.59 | sb_gmnbmd_00<br>04h11.t7           | Unassigned protein                                                                                                                                                                                    |
| 41827 | 3.65 | 0.16 | 0.0008 | 0.0223 | 1.58 | sb_gmapov_001<br>7j24.pDNRF2       | Rfc5 protein; n=5; Clupeccephala                                                                                                                                                                      |
| 55194 | 3.74 | 0.16 | 0.0006 | 0.0202 | 1.58 | all_v2.0.9305.C<br>1               | unclassified                                                                                                                                                                                          |
| 44663 | 6.46 | 0.08 | 0.0000 | 0.0022 | 1.58 | all_v2.0.7931.C<br>1               | Drf_FH1 multi-domain protein                                                                                                                                                                          |
| 45143 | 4.12 | 0.13 | 0.0003 | 0.0123 | 1.58 | all_v2.0.8322.C<br>2               | LOC540789; similar to poly (ADP-ribose)<br>polymerase family, member 14                                                                                                                               |
| 47368 | 5.35 | 0.10 | 0.0000 | 0.0035 | 1.57 | sb_gmnl1a_003<br>6m01.t7           | Unassigned protein                                                                                                                                                                                    |
| 44550 | 4.32 | 0.13 | 0.0002 | 0.0100 | 1.57 | IRAK41                             | custom - interleukin-1 receptor-associated<br>kinase 4                                                                                                                                                |
| 55249 | 3.83 | 0.15 | 0.0005 | 0.0181 | 1.57 | all_v2.0.3039.C<br>5               | unclassified                                                                                                                                                                                          |
| 42860 | 3.56 | 0.16 | 0.0009 | 0.0250 | 1.56 | all_v2.0.7093.C<br>1               | Type II inositol-1,4,5-trisphosphate 5-<br>phosphatase precursor (EC 3.1.3.36)<br>(Phosphoinositide 5-phosphatase) (5PTase)<br>(75 kDa inositol polyphosphate-5-<br>phosphatase).; n=2; Gallus gallus |
| 48417 | 3.72 | 0.16 | 0.0007 | 0.0206 | 1.56 | sb_gmnbpcic_0<br>009d03.pDNR       | Unassigned protein                                                                                                                                                                                    |
| 51062 | 3.82 | 0.14 | 0.0005 | 0.0181 | 1.55 | m13r                               | unclassified                                                                                                                                                                                          |
| 50297 | 4.07 | 0.13 | 0.0003 | 0.0131 | 1.55 | all_v2.0.8508.C<br>1               | unclassified                                                                                                                                                                                          |
| 35880 | 6.84 | 0.07 | 0.0000 | 0.0022 | 1.55 | all_v2.0.12538.<br>C1              | unclassified                                                                                                                                                                                          |
| 48803 | 4.24 | 0.13 | 0.0002 | 0.0111 | 1.54 | sb_gmnlfta_00<br>05j01.t7          | Alpha-aminoacidic semialdehyde<br>dehydrogenase; n=12; Eutheria                                                                                                                                       |
| 41718 | 3.75 | 0.14 | 0.0006 | 0.0199 | 1.53 | sb_gmapte_000<br>6b21.pDNRF2       | Unassigned protein                                                                                                                                                                                    |
| 51908 | 3.73 | 0.14 | 0.0007 | 0.0203 | 1.53 | all_v2.0.12871.<br>C1              | RBM39 protein; n=4; Eutheria                                                                                                                                                                          |
| 50011 | 6.41 | 0.07 | 0.0000 | 0.0022 | 1.53 | all_v2.0.14478.<br>C1              | unclassified                                                                                                                                                                                          |
| 44015 | 4.15 | 0.12 | 0.0003 | 0.0119 | 1.52 | all_v2.0.1566.C<br>1               | unclassified                                                                                                                                                                                          |
| 42386 | 3.52 | 0.14 | 0.0010 | 0.0267 | 1.52 | all_v2.0.11085.<br>C1              | Zgc:86905; n=1; Danio rerio                                                                                                                                                                           |
| 49081 | 5.45 | 0.09 | 0.0000 | 0.0032 | 1.51 | all_v2.0.14020.<br>C1              | STEAP family member 4; n=1;<br>Oncorhynchus mykiss                                                                                                                                                    |
| 44256 | 4.36 | 0.11 | 0.0002 | 0.0096 | 1.51 | all_v2.0.4460.C<br>1               | unclassified                                                                                                                                                                                          |
| 46412 | 3.77 | 0.13 | 0.0006 | 0.0192 | 1.51 | all_v2.0.1221.C<br>3               | AIG1 domain containing protein                                                                                                                                                                        |
| 47749 | 3.87 | 0.13 | 0.0005 | 0.0171 | 1.51 | all_v2.0.10562.<br>C1              | Ubiquitin family protein                                                                                                                                                                              |
| 40051 | 4.88 | 0.10 | 0.0001 | 0.0054 | 1.51 | sb_gmnbmu_00<br>03o07.pDNRF2       | Unassigned protein                                                                                                                                                                                    |
| 39384 | 3.94 | 0.12 | 0.0004 | 0.0152 | 1.50 | all_v2.0.7433.C<br>1               | Poly [ADP-ribose] polymerase 12 (EC<br>2.4.2.30) (PARP-12) (Zinc finger CCCH<br>domain-containing protein 1).; n=1;<br>Takifugu rubripes                                                              |
| 52513 | 4.32 | 0.11 | 0.0002 | 0.0100 | 1.49 | all_v2.0.3955.C<br>1               | Novel NACHT domain containing protein;<br>n=2; Danio rerio                                                                                                                                            |
| 54433 | 3.85 | 0.12 | 0.0005 | 0.0174 | 1.48 | all_v2.0.14032.<br>C1              | unclassified                                                                                                                                                                                          |
| 41562 | 4.00 | 0.12 | 0.0004 | 0.0142 | 1.48 | all_v2.0.2698.C<br>2               | unclassified                                                                                                                                                                                          |
| 46415 | 3.60 | 0.14 | 0.0009 | 0.0242 | 1.48 | sb_gmnlmfta_0<br>004n10.t7         | Protein-tyrosine phosphatase-like member<br>A; n=9; Eutheria                                                                                                                                          |
| 36194 | 3.59 | 0.13 | 0.0009 | 0.0243 | 1.48 | sb_gmnl1a_004<br>0g13.t7           | U-editing enzyme APOBEC-2 gb                                                                                                                                                                          |
| 42375 | 3.95 | 0.12 | 0.0004 | 0.0152 | 1.47 | all_v2.0.12049.<br>C1              | Bloodthirsty; n=2; Notothenioidei                                                                                                                                                                     |
| 55247 | 4.39 | 0.10 | 0.0002 | 0.0093 | 1.47 | sb_gmnbspic_0<br>005a23.pDNRF<br>2 | SRY-box containing gene 11a; n=1;<br>Gnathonemus petersii                                                                                                                                             |
|       |      |      |        |        | 1.47 | all_v2.0.5047.C                    | unclassified                                                                                                                                                                                          |

|       |      |      |        |        |      | 1                                    |                                                                                                                                                                                                                                                                                                                                   |
|-------|------|------|--------|--------|------|--------------------------------------|-----------------------------------------------------------------------------------------------------------------------------------------------------------------------------------------------------------------------------------------------------------------------------------------------------------------------------------|
| 44195 | 4.31 | 0.10 | 0.0002 | 0.0101 | 1.47 | sb_gmnlem_00<br>25b10.t7             | [E] COG0421 Spermidine synthase                                                                                                                                                                                                                                                                                                   |
| 39971 | 3.72 | 0.13 | 0.0007 | 0.0206 | 1.47 | all_v2.0.10807.<br>C1                | phospholipase C delta 3; n=1; Takifugu<br>rubripes                                                                                                                                                                                                                                                                                |
| 43079 | 3.99 | 0.11 | 0.0004 | 0.0142 | 1.46 | sb_gmapht_000<br>4g05.pDNRF2         | UPI0000E4E275 related cluster; n=1; Danio<br>rerio                                                                                                                                                                                                                                                                                |
| 42172 | 5.58 | 0.07 | 0.0000 | 0.0028 | 1.46 | sb_gmnl1a_004<br>5h19.t7             | Si:dkey-21k10.1 protein; n=3; Danio rerio                                                                                                                                                                                                                                                                                         |
| 41894 | 4.66 | 0.09 | 0.0001 | 0.0067 | 1.45 | all_v2.0.2051.C<br>1                 | Ribosomal protein L32; n=5; Euteleostei                                                                                                                                                                                                                                                                                           |
| 51902 | 4.91 | 0.09 | 0.0001 | 0.0052 | 1.45 | all_v2.0.11621.<br>C1                | unclassified                                                                                                                                                                                                                                                                                                                      |
| 38489 | 3.49 | 0.13 | 0.0011 | 0.0276 | 1.45 | all_v2.0.2131.C<br>1                 | Homolog of Salmo salar Pentraxin<br>precursor.; n=1; Takifugu rubripes                                                                                                                                                                                                                                                            |
| 36367 | 4.28 | 0.10 | 0.0002 | 0.0105 | 1.45 | all_v2.0.1055.C<br>2                 | Cathepsin L; n=2; Percomorpha                                                                                                                                                                                                                                                                                                     |
| 50298 | 3.66 | 0.12 | 0.0008 | 0.0222 | 1.45 | all_v2.0.17232.<br>C1                | unclassified                                                                                                                                                                                                                                                                                                                      |
| 42028 | 3.55 | 0.13 | 0.0010 | 0.0256 | 1.44 | sb_gmnbhkc_0<br>012124.pDNRF<br>2    | Secernin 3; n=3; Tetraodontidae                                                                                                                                                                                                                                                                                                   |
| 36407 | 4.12 | 0.10 | 0.0003 | 0.0123 | 1.44 | all_v2.0.1864.C<br>7                 | CD9 protein; n=1; Oncorhynchus mykiss                                                                                                                                                                                                                                                                                             |
| 43951 | 4.89 | 0.08 | 0.0001 | 0.0053 | 1.44 | sb_gmnbpcic_0<br>010g12.pDNRF<br>2   | Zgc:77292; n=2; Danio rerio                                                                                                                                                                                                                                                                                                       |
| 35894 | 3.65 | 0.12 | 0.0008 | 0.0223 | 1.43 | all_v2.0.16939.<br>C1                | Aminopeptidase N; n=2; Pseudopleuronectes<br>americanus                                                                                                                                                                                                                                                                           |
| 54855 | 3.85 | 0.11 | 0.0005 | 0.0175 | 1.43 | all_v2.0.8904.C<br>1                 | unclassified                                                                                                                                                                                                                                                                                                                      |
| 43202 | 4.93 | 0.08 | 0.0001 | 0.0051 | 1.42 | all_v2.0.9330.C<br>2                 | Viperin-like protein; n=1; Channa argus                                                                                                                                                                                                                                                                                           |
| 55134 | 4.05 | 0.10 | 0.0003 | 0.0134 | 1.42 | all_v2.0.392.C2                      | unclassified                                                                                                                                                                                                                                                                                                                      |
| 38436 | 3.58 | 0.11 | 0.0009 | 0.0243 | 1.41 | sb_gmapov_000<br>5h22.pDNRF2         | Homolog of Homo sapiens Vacuolar sorting<br>protein 54 long isoform; n=1; Takifugu<br>rubripes                                                                                                                                                                                                                                    |
| 49022 | 4.05 | 0.09 | 0.0003 | 0.0133 | 1.41 | sb_gmnlskic_00<br>09d23.pDNRM<br>13r | Unassigned protein<br>CASP8 and FADD-like apoptosis regulator<br>precursor (Cellular FLICE-like inhibitory<br>protein) (c-FLIP) (Caspase-eight-related<br>protein) (Casper) (Caspase-like apoptosis<br>regulatory protein) (CLARP) (MACH-<br>related inducer of toxicity) (MRIT) (Caspase<br>homolog) (C); n=1; Takifugu rubripes |
| 36328 | 3.80 | 0.11 | 0.0006 | 0.0185 | 1.40 | all_v2.0.16926.<br>C1                |                                                                                                                                                                                                                                                                                                                                   |
| 44066 | 4.16 | 0.09 | 0.0003 | 0.0119 | 1.40 | all_v2.0.7765.C<br>1                 | Zgc:92254; n=2; Danio rerio                                                                                                                                                                                                                                                                                                       |
| 40840 | 4.37 | 0.09 | 0.0002 | 0.0095 | 1.39 | sb_gmnbhkas_0<br>018n05.pDNRF<br>2   | PREDICTED: similar to poly (ADP-ribose)<br>polymerase family, member 11.; n=1;<br>Monodelphis domestica                                                                                                                                                                                                                           |
| 48696 | 3.77 | 0.10 | 0.0006 | 0.0192 | 1.39 | all_v2.0.40.C3                       | Unassigned protein                                                                                                                                                                                                                                                                                                                |
| 36150 | 3.49 | 0.11 | 0.0011 | 0.0275 | 1.39 | sb_gmapov_002<br>6e24.pDNRF2         | Beta-glucuronidase precursor; n=1; Sus<br>scrofa                                                                                                                                                                                                                                                                                  |
| 38854 | 3.59 | 0.10 | 0.0009 | 0.0243 | 1.38 | all_v2.0.4197.C<br>1                 | LOC794166 protein; n=2; Danio rerio                                                                                                                                                                                                                                                                                               |
| 52110 | 4.31 | 0.08 | 0.0002 | 0.0101 | 1.37 | all_v2.0.8876.C<br>1                 | unclassified                                                                                                                                                                                                                                                                                                                      |
| 38561 | 3.51 | 0.11 | 0.0011 | 0.0271 | 1.37 | all_v2.0.16357.<br>C1                | Importin alpha; n=1; Pagrus major                                                                                                                                                                                                                                                                                                 |
| 38422 | 3.67 | 0.10 | 0.0007 | 0.0220 | 1.37 | sb_gmapov_001<br>9e16.pDNRF2         | Homolog of Homo sapiens Transport-<br>secretion protein 2.2; n=1; Takifugu rubripes                                                                                                                                                                                                                                               |
| 38263 | 3.52 | 0.10 | 0.0010 | 0.0270 | 1.36 | all_v2.0.10484.<br>C1                | Homolog of Homo sapiens Placenta-specific<br>gene 8 protein; n=1; Takifugu rubripes                                                                                                                                                                                                                                               |
| 43674 | 5.11 | 0.06 | 0.0001 | 0.0046 | 1.36 | all_v2.0.13048.<br>C1                | Zgc:153384; n=1; Danio rerio                                                                                                                                                                                                                                                                                                      |
| 53244 | 3.77 | 0.09 | 0.0006 | 0.0193 | 1.36 | all_v2.0.1478.C<br>3                 | unclassified                                                                                                                                                                                                                                                                                                                      |

|       |       |      |        |        |      |                               |                                                                                                                                                                                             |
|-------|-------|------|--------|--------|------|-------------------------------|---------------------------------------------------------------------------------------------------------------------------------------------------------------------------------------------|
| 39323 | 3.65  | 0.10 | 0.0008 | 0.0223 | 1.36 | all_v2.0.6027.C9              | NFX1-type zinc finger-containing protein 1.; n=1; Takifugu rubripes                                                                                                                         |
| 37498 | 3.57  | 0.10 | 0.0009 | 0.0247 | 1.36 | all_v2.0.3198.C3              | GTP-binding nuclear protein Ran; n=35; Euteleostomi                                                                                                                                         |
| 52971 | 4.32  | 0.08 | 0.0002 | 0.0100 | 1.36 | all_v2.0.7146.C1              | unclassified                                                                                                                                                                                |
| 47948 | 3.88  | 0.09 | 0.0005 | 0.0169 | 1.35 | all_v2.0.17446.C1             | Unassigned protein                                                                                                                                                                          |
| 53976 | 4.43  | 0.07 | 0.0002 | 0.0088 | 1.34 | all_v2.0.13765.C1             | unclassified                                                                                                                                                                                |
| 44431 | 4.12  | 0.08 | 0.0003 | 0.0123 | 1.34 | CASP106                       | custom - caspase 10, apoptosis-related cysteine peptidase                                                                                                                                   |
| 42664 | 4.75  | 0.06 | 0.0001 | 0.0062 | 1.33 | sb_gmnlskic_0011d03.pDNRm13r  | Transcription factor; n=8; Clupeocephala                                                                                                                                                    |
| 42329 | 3.96  | 0.08 | 0.0004 | 0.0151 | 1.32 | all_v2.0.9973.C1              | Sorting nexin-25.; n=2; Gallus gallus                                                                                                                                                       |
| 39741 | 4.63  | 0.06 | 0.0001 | 0.0070 | 1.32 | all_v2.0.11115.C1             | Nuclear receptor coactivator 7.; n=1; Gallus gallus                                                                                                                                         |
| 36901 | 3.68  | 0.08 | 0.0007 | 0.0218 | 1.32 | all_v2.0.5271.C1              | DNA-directed RNA polymerase I subunit RPA49 (RNA polymerase I- associated factor 53) (RNA polymerase I polypeptide E) (RNA polymerase I-associated factor 1) (A49).; n=1; Takifugu rubripes |
| 45101 | 3.65  | 0.08 | 0.0008 | 0.0223 | 1.31 | all_v2.0.12734.C1             | LOC480945; similar to LINE-1 reverse transcriptase homolog                                                                                                                                  |
| 51606 | 3.75  | 0.08 | 0.0006 | 0.0197 | 1.31 | all_v2.0.4073.C1              | unclassified                                                                                                                                                                                |
| 39654 | 4.93  | 0.06 | 0.0001 | 0.0051 | 1.31 | all_v2.0.4.CB39               | Novel protein; n=3; Danio rerio                                                                                                                                                             |
| 38114 | 4.16  | 0.07 | 0.0003 | 0.0119 | 1.30 | all_v2.0.3580.C6              | Homolog of Homo sapiens Inter-alpha (globulin) Inhibitor H3; n=1; Takifugu rubripes                                                                                                         |
| 46677 | 4.16  | 0.07 | 0.0003 | 0.0119 | 1.30 | all_v2.0.4.C247               | Unassigned protein                                                                                                                                                                          |
| 39586 | 3.70  | 0.07 | 0.0007 | 0.0211 | 1.29 | all_v2.0.14243.C1             | Novel protein; n=2; Danio rerio                                                                                                                                                             |
| 36187 | 6.02  | 0.04 | 0.0000 | 0.0026 | 1.29 | sb_gmnbspic_0012h03.pDNRm13r  | Bloodthirsty; n=2; Notothenioidei                                                                                                                                                           |
| 44937 | 3.85  | 0.07 | 0.0005 | 0.0174 | 1.28 | all_v2.0.5180.C1              | Itgax; integrin alpha X; K06462 integrin alpha X                                                                                                                                            |
| 49145 | 3.57  | 0.07 | 0.0009 | 0.0247 | 1.27 | all_v2.0.14514.C1             | unclassified                                                                                                                                                                                |
| 40724 | 4.04  | 0.06 | 0.0003 | 0.0134 | 1.27 | sb_gmapht_0004l21.pDNRf2      | PREDICTED: similar to NOD3 protein; n=1; Danio rerio                                                                                                                                        |
| 52165 | 3.51  | 0.07 | 0.0011 | 0.0271 | 1.26 | all_v2.0.2593.C1              | unclassified                                                                                                                                                                                |
| 54622 | 3.62  | 0.07 | 0.0008 | 0.0237 | 1.26 | all_v2.0.15445.C1             | unclassified                                                                                                                                                                                |
| 51980 | 4.09  | 0.05 | 0.0003 | 0.0128 | 1.25 | all_v2.0.703.C1               | unclassified                                                                                                                                                                                |
| 45088 | 3.51  | 0.06 | 0.0010 | 0.0270 | 1.24 | sb_gmnlkric_0002a08.t7        | LOC477822; similar to hyaluronan binding protein 2 [EC:3.4.21.-]; K08648 hyaluronan binding protein 2                                                                                       |
| 54167 | 3.48  | 0.05 | 0.0011 | 0.0277 | 1.19 | all_v2.0.3108.C1              | unclassified                                                                                                                                                                                |
| 40407 | 3.65  | 0.04 | 0.0008 | 0.0223 | 1.17 | all_v2.0.17488.C1             | PREDICTED: similar to DNA-directed RNA polymerase II largest subunit; n=1; Homo sapiens                                                                                                     |
| 48016 | 3.60  | 0.04 | 0.0009 | 0.0242 | 1.16 | all_v2.0.4.C264               | Unassigned protein                                                                                                                                                                          |
| 48778 | -5.04 | 0.04 | 0.0001 | 0.0049 | 0.80 | sb_gmnbhkas_0017b15.pDNRm13r  | Unassigned protein                                                                                                                                                                          |
| 51863 | -4.92 | 0.06 | 0.0001 | 0.0051 | 0.76 | all_v2.0.3829.C1              | unclassified                                                                                                                                                                                |
| 42500 | -5.15 | 0.06 | 0.0000 | 0.0045 | 0.74 | sb_gmnbhkcic_0011p05.pDNRm13r | T-complex protein 1 subunit delta; n=21; Tetrapoda                                                                                                                                          |
| 45360 | -6.02 | 0.06 | 0.0000 | 0.0026 | 0.71 | all_v2.0.1480.C1              | LOC797694; similar to solute carrier family 25 member 5 protein                                                                                                                             |



|       |       |      |        |        |      |                                 |                                                                                                   |
|-------|-------|------|--------|--------|------|---------------------------------|---------------------------------------------------------------------------------------------------|
| 49813 | -4.97 | 0.10 | 0.0001 | 0.0051 | 0.64 | all_v2.0.2128.C<br>1            | unclassified                                                                                      |
| 35984 | -4.86 | 0.13 | 0.0001 | 0.0054 | 0.60 | sb_gmnbmu_00<br>01o21.pDNRF2    | Ariadne homolog, ubiquitin-conjugating<br>enzyme E2 binding protein, 1 like; n=6;<br>Euteleostomi |
| 39895 | -7.36 | 0.08 | 0.0000 | 0.0019 | 0.59 | all_v2.0.3146.C<br>1            | Peptidyl-prolyl cis-trans isomerase; n=2;<br>Tetraodontidae                                       |
| 39896 | -4.81 | 0.17 | 0.0001 | 0.0057 | 0.54 | all_v2.0.3146.C<br>2            | Peptidyl-prolyl cis-trans isomerase; n=2;<br>Tetraodontidae                                       |
| 53859 | -4.81 | 0.19 | 0.0001 | 0.0057 | 0.50 | all_v2.0.5016.C<br>2            | unclassified                                                                                      |
| 49585 | -5.10 | 0.25 | 0.0001 | 0.0046 | 0.41 | all_v2.0.115.C1<br>sb_gmnbmu_00 | unclassified                                                                                      |
| 38067 | -5.09 | 0.26 | 0.0001 | 0.0046 | 0.38 | 12g06.pDNRM<br>13r              | Homolog of Homo sapiens FK506 binding<br>protein 10 precursor; n=1; Takifugu rubripes             |

<sup>a</sup>Fold-changes are presented as outputted by siggenes and were calculated as pIC/PBS

Supplemental Table S8. 339 Genes differentially expressed between fish injected with pIC at 10°C and 16°C and sampled at 24HPI

| Probe ID | d-value | Stdev | Raw p  | q-value | Fold Change <sup>a</sup> | Sequence Name                                 | Gene Name                                                                       |
|----------|---------|-------|--------|---------|--------------------------|-----------------------------------------------|---------------------------------------------------------------------------------|
| 53704    | 6.25    | 0.30  | 0.0000 | 0.0028  | 4.10                     | all_v2.0.1006.C1                              | unclassified                                                                    |
| 45392    | 9.53    | 0.14  | 0.0000 | 0.0026  | 3.16                     | all_v2.0.341.C5<br>all_v2.0.6888.C1           | Metallothio domain containing protein                                           |
| 42545    | 4.29    | 0.22  | 0.0001 | 0.0089  | 2.17                     | 1                                             | Thioredoxin; n=1; Ictalurus punctatus                                           |
| 55146    | 4.65    | 0.21  | 0.0001 | 0.0062  | 2.12                     | all_v2.0.712.C1<br>all_v2.0.5853.C1           | unclassified                                                                    |
| 43363    | 4.90    | 0.16  | 0.0000 | 0.0053  | 1.92                     | 1                                             | Zgc:103456; n=1; Danio rerio                                                    |
| 51914    | 5.10    | 0.15  | 0.0000 | 0.0044  | 1.89                     | all_v2.0.17634.C1                             | unclassified                                                                    |
| 50372    | 4.72    | 0.15  | 0.0001 | 0.0062  | 1.81                     | all_v2.0.3379.C2                              | unclassified                                                                    |
| 51982    | 4.98    | 0.13  | 0.0000 | 0.0050  | 1.77                     | all_v2.0.6362.C1                              | unclassified                                                                    |
| 37555    | 4.26    | 0.16  | 0.0001 | 0.0091  | 1.77                     | all_v2.0.3403.C1                              | Heat shock protein 47; n=1; Oncorhynchus mykiss                                 |
| 35767    | 5.04    | 0.13  | 0.0000 | 0.0047  | 1.75                     | all_v2.0.2545.C1                              | Activating transcription factor 7-interacting protein 1; n=2; Danio rerio       |
| 55263    | 6.86    | 0.08  | 0.0000 | 0.0028  | 1.73                     | all_v2.0.655.C1<br>all_v2.0.4885.C2           | unclassified<br>Heat shock protein HSP 90-alpha; n=8; Clupeocephala             |
| 37572    | 4.15    | 0.15  | 0.0002 | 0.0102  | 1.67                     | all_v2.0.4885.C1                              | LOC100017761; similar to 90-kDa heat shock protein                              |
| 45010    | 6.48    | 0.08  | 0.0000 | 0.0028  | 1.66                     | all_v2.0.16020.C1                             | Heat shock protein 90; n=13; Euteleostomi                                       |
| 37564    | 5.29    | 0.11  | 0.0000 | 0.0040  | 1.66                     | all_v2.0.1965.C1                              | unclassified                                                                    |
| 55159    | 4.18    | 0.14  | 0.0002 | 0.0099  | 1.65                     | sb_gmnlkfta_0003o06.t7                        | Heat shock protein HSP 90-alpha; n=8; Clupeocephala                             |
| 37573    | 5.99    | 0.09  | 0.0000 | 0.0032  | 1.65                     | all_v2.0.6456.C1                              | unclassified                                                                    |
| 51529    | 4.13    | 0.15  | 0.0002 | 0.0104  | 1.65                     | all_v2.0.2840.C1                              | PREDICTED: similar to heat shock protein 1, beta isoform 1; n=1; Apis mellifera |
| 40546    | 4.94    | 0.11  | 0.0000 | 0.0051  | 1.64                     | all_v2.0.5811.C1                              | PREDICTED: similar to glutathione S-transferase mu isoform 1; n=1; Danio rerio  |
| 40508    | 5.12    | 0.10  | 0.0000 | 0.0044  | 1.61                     | all_v2.0.10007.C1                             | Heat shock protein 90; n=13; Euteleostomi                                       |
| 37563    | 7.91    | 0.05  | 0.0000 | 0.0028  | 1.57                     | all_v2.0.2479.C1                              | Heat shock protein 90Ae.; n=1; Takifugu rubripes                                |
| 37566    | 4.58    | 0.11  | 0.0001 | 0.0065  | 1.55                     | sb_gmnlkic_0007p20.pDNRM13r                   | UPI0000D8CC26 related cluster; n=2; Danio rerio                                 |
| 43036    | 5.57    | 0.08  | 0.0000 | 0.0034  | 1.54                     | all_v2.0.11081.C1                             | unclassified                                                                    |
| 50202    | 4.59    | 0.10  | 0.0001 | 0.0065  | 1.54                     | all_v2.0.11401.C1                             | Chaperonin containing TCP1, subunit 6A; n=3; Euteleostomi                       |
| 36470    | 4.90    | 0.09  | 0.0000 | 0.0053  | 1.54                     | all_v2.0.1961.C1                              | Heat shock protein HSP 90-beta; n=13; Euteleostomi                              |
| 37574    | 5.62    | 0.08  | 0.0000 | 0.0034  | 1.52                     | all_v2.0.1961.C1                              | Chaperonin containing TCP1, subunit 5; n=4; Clupeocephala                       |
| 36468    | 4.33    | 0.10  | 0.0001 | 0.0088  | 1.49                     | all_v2.0.495.C1<br>sb_gmnblits_0026m11.pDNRF2 | HSP90 multi-domain protein                                                      |
| 44902    | 7.28    | 0.05  | 0.0000 | 0.0028  | 1.47                     | all_v2.0.10969.C1                             | Guanylate kinase 1; n=2; Danio rerio                                            |
| 37523    | 4.86    | 0.08  | 0.0001 | 0.0054  | 1.47                     | sb_gmnbhkas_0016k04.pDNRF2                    | Protein kinase C delta type (EC 2.7.11.13) (nPKC-delta); n=1; Takifugu rubripes |
| 41479    | 5.25    | 0.08  | 0.0000 | 0.0040  | 1.47                     | sb_gmapov_0018o17.pDNRF2                      | LOC488397; similar to Methyltransferase-like protein 2                          |
| 45113    | 4.64    | 0.08  | 0.0001 | 0.0062  | 1.44                     | all_v2.0.5279.C2.a                            | non-directed                                                                    |
| 45907    | 4.62    | 0.08  | 0.0001 | 0.0064  | 1.41                     |                                               |                                                                                 |

|       |       |      |        |        |      |                                       |                                                                                                                                                                                                                                                       |
|-------|-------|------|--------|--------|------|---------------------------------------|-------------------------------------------------------------------------------------------------------------------------------------------------------------------------------------------------------------------------------------------------------|
| 42467 | 4.94  | 0.06 | 0.0000 | 0.0051 | 1.37 | sb_gmnbspic_0<br>010b12.pDNR<br>m13r  | TANK-binding kinase 1; n=1; Danio rerio                                                                                                                                                                                                               |
| 52113 | 4.64  | 0.07 | 0.0001 | 0.0063 | 1.36 | all_v2.0.6041.C<br>1                  | unclassified                                                                                                                                                                                                                                          |
| 37544 | 4.19  | 0.07 | 0.0002 | 0.0097 | 1.35 | sb_gmnlkfta_00<br>02e06.t7            | Heat shock 70kDa protein 8; n=1; Danio rerio                                                                                                                                                                                                          |
| 45645 | 4.42  | 0.06 | 0.0001 | 0.0082 | 1.31 | all_v2.0.8202.C<br>1                  | non-directed                                                                                                                                                                                                                                          |
| 39377 | 4.59  | 0.05 | 0.0001 | 0.0065 | 1.30 | sb_gmnblits_00<br>26k02.pDNRF2        | Novel KRAB box and zinc finger, C2H2 type<br>domain containing protein; n=4; Mus musculus                                                                                                                                                             |
| 37878 | -4.43 | 0.03 | 0.0001 | 0.0082 | 0.83 | sb_gmnlskic_00<br>14i20.pDNRm1<br>3r  | Homolog of Fugu rubripes Topoisomerase I beta.;<br>n=1; Takifugu rubripes                                                                                                                                                                             |
| 55532 | -3.45 | 0.06 | 0.0008 | 0.0215 | 0.81 | all_v2.0.10346.<br>C1                 | ZNFX1; zinc finger, NFX1-type containing 1<br>GGT1, GGT; gamma-glutamyltransferase 1<br>[EC:2.3.2.2]; K00681 gamma-<br>glutamyltranspeptidase                                                                                                         |
| 44823 | -3.74 | 0.05 | 0.0004 | 0.0157 | 0.81 | sb_gmnbmd_00<br>02f22.pDNRF2          | unclassified                                                                                                                                                                                                                                          |
| 52234 | -3.44 | 0.06 | 0.0008 | 0.0217 | 0.80 | all_v2.0.8483.C<br>1                  | unclassified                                                                                                                                                                                                                                          |
| 54760 | -4.17 | 0.05 | 0.0002 | 0.0100 | 0.80 | all_v2.0.5450.C<br>1                  | unclassified                                                                                                                                                                                                                                          |
| 42617 | -3.31 | 0.07 | 0.0011 | 0.0264 | 0.79 | sb_gmnbspic_0<br>011f05.pDNRF<br>2    | Torsin B precursor (Torsin family 1 member B).;<br>n=1; Takifugu rubripes                                                                                                                                                                             |
| 37158 | -3.59 | 0.06 | 0.0006 | 0.0181 | 0.79 | all_v2.0.11686.<br>C1                 | Fance protein; n=4; Danio rerio                                                                                                                                                                                                                       |
| 46972 | -3.94 | 0.06 | 0.0003 | 0.0128 | 0.79 | sb_gmnbhkc_0<br>013n08.pDNRF<br>2     | Unassigned protein                                                                                                                                                                                                                                    |
| 36028 | -3.37 | 0.07 | 0.0010 | 0.0242 | 0.79 | all_v2.0.3.C4<br>all_v2.0.1652.C<br>1 | ATP synthase subunit beta, mitochondrial<br>precursor; n=27; Euteleostomi                                                                                                                                                                             |
| 46159 | -3.67 | 0.07 | 0.0005 | 0.0166 | 0.78 | all_v2.0.11230.<br>C1                 | Rh-like protein [Apis mellifera] gb                                                                                                                                                                                                                   |
| 50643 | -3.36 | 0.08 | 0.0010 | 0.0244 | 0.78 | all_v2.0.7789.C<br>2                  | unclassified                                                                                                                                                                                                                                          |
| 49070 | -3.81 | 0.07 | 0.0004 | 0.0146 | 0.78 |                                       | unclassified<br>PREDICTED: similar to Inositol 1,4,5-<br>trisphosphate receptor type 2 (Type 2 inositol<br>1,4,5-trisphosphate receptor) (Type 2 InsP3<br>receptor) (IP3 receptor isoform 2) (InsP3R2)<br>isoform 1; n=2; Eutheria                    |
| 40563 | -3.60 | 0.07 | 0.0006 | 0.0179 | 0.78 | sb_gmapht_000<br>6g21.pDNRF2          | LOC496786 protein; n=1; Xenopus tropicalis                                                                                                                                                                                                            |
| 38816 | -3.41 | 0.08 | 0.0009 | 0.0226 | 0.77 | sb_gmapov_001<br>4f14.pDNRF2          | unclassified                                                                                                                                                                                                                                          |
| 51403 | -3.88 | 0.07 | 0.0003 | 0.0136 | 0.77 | all_v2.0.6524.C<br>1                  | unclassified                                                                                                                                                                                                                                          |
| 49961 | -3.36 | 0.08 | 0.0010 | 0.0245 | 0.77 | all_v2.0.12262.<br>C1                 | unclassified                                                                                                                                                                                                                                          |
| 37118 | -3.31 | 0.09 | 0.0011 | 0.0263 | 0.76 | all_v2.0.2012.C<br>1                  | Eukaryotic translation initiation factor 4E; n=5;<br>Xenopus                                                                                                                                                                                          |
| 47291 | -3.46 | 0.08 | 0.0008 | 0.0215 | 0.76 | all_v2.0.606.C2                       | Unassigned protein                                                                                                                                                                                                                                    |
| 42375 | -3.48 | 0.08 | 0.0008 | 0.0212 | 0.76 | sb_gmnbspic_0<br>005a23.pDNRF<br>2    | SRY-box containing gene 11a; n=1; Gnathonemus<br>petersii                                                                                                                                                                                             |
| 42817 | -3.83 | 0.07 | 0.0004 | 0.0143 | 0.76 | sb_gmapov_001<br>2m19.pDNRm1<br>3r    | Tubulin alpha chain; n=36; Fungi/Metazoa group<br>ATP-sensitive inward rectifier potassium channel<br>15 (Potassium channel, inwardly rectifying<br>subfamily J member 15) (Inward rectifier K(+)<br>channel Kir4.2) (Kir1.3); n=1; Takifugu rubripes |
| 36080 | -3.36 | 0.09 | 0.0010 | 0.0245 | 0.76 | sb_gmnbhkas_0<br>015j06.pDNRF<br>2    | Unassigned protein                                                                                                                                                                                                                                    |
| 47830 | -3.33 | 0.09 | 0.0011 | 0.0254 | 0.76 | sb_gmapht_001<br>3i09.pDNRm13<br>r    | Unassigned protein                                                                                                                                                                                                                                    |
| 39371 | -5.00 | 0.05 | 0.0000 | 0.0048 | 0.75 | sb_gmnbhkas_0<br>007i12.pDNRF<br>2    | Novel immune-type receptor 4; n=2; Oncorhynchus<br>mykiss                                                                                                                                                                                             |

|       |       |      |        |        |      |                             |                                                                                                                                                                                         |
|-------|-------|------|--------|--------|------|-----------------------------|-----------------------------------------------------------------------------------------------------------------------------------------------------------------------------------------|
| 45624 | -3.74 | 0.08 | 0.0004 | 0.0157 | 0.75 | all_v2.0.17285.C1.a         | non-directed                                                                                                                                                                            |
| 39577 | -3.51 | 0.09 | 0.0007 | 0.0201 | 0.75 | all_v2.0.15015.C1           | Novel protein; n=13; Danio rerio                                                                                                                                                        |
| 46732 | -3.28 | 0.10 | 0.0012 | 0.0274 | 0.74 | sb_gmnlem_0027j18.t7        | Unassigned protein                                                                                                                                                                      |
| 38998 | -3.76 | 0.08 | 0.0004 | 0.0155 | 0.74 | sb_gmnlem_0024i03.t7        | MGC115621 protein; n=1; Xenopus laevis                                                                                                                                                  |
| 52306 | -5.19 | 0.05 | 0.0000 | 0.0042 | 0.74 | all_v2.0.14732.C1           | unclassified                                                                                                                                                                            |
| 54046 | -3.47 | 0.09 | 0.0008 | 0.0212 | 0.74 | all_v2.0.5705.C1            | unclassified                                                                                                                                                                            |
| 42696 | -3.89 | 0.08 | 0.0003 | 0.0136 | 0.74 | all_v2.0.6415.C2            | Translocon-associated protein subunit gamma; n=14; Euteleostomi                                                                                                                         |
| 45298 | -3.71 | 0.09 | 0.0004 | 0.0160 | 0.74 | sb_gmapht_0036o07.pDNRF2    | LOC728894; similar to gamma-aminobutyric acid (GABA-A) receptor, subunit epsilon                                                                                                        |
| 36551 | -3.79 | 0.08 | 0.0004 | 0.0151 | 0.74 | all_v2.0.2681.C1            | Cofilin-1; n=15; Eutheria                                                                                                                                                               |
| 46762 | -3.33 | 0.10 | 0.0011 | 0.0254 | 0.74 | sb_gmbngi_0004p23.pDNRm13r  | Unassigned protein                                                                                                                                                                      |
| 35849 | -3.55 | 0.10 | 0.0006 | 0.0189 | 0.74 | all_v2.0.11586.C1           | Alkaline ceramidase 2 (EC 3.5.1.23) (AlkCDase 2) (Acylsphingosine deacylase 3-like) (N-acylsphingosine amidohydrolase 3-like); n=1; Takifugu rubripes                                   |
| 49596 | -3.93 | 0.08 | 0.0003 | 0.0130 | 0.74 | all_v2.0.2907.C1            | unclassified                                                                                                                                                                            |
| 37738 | -3.74 | 0.09 | 0.0004 | 0.0157 | 0.74 | sb_gmbbhkic_0007m23.pDNR F2 | Homolog of Brachydanio rerio Microspherule protein 1.; n=1; Takifugu rubripes                                                                                                           |
| 39323 | -3.29 | 0.10 | 0.0012 | 0.0273 | 0.74 | all_v2.0.6027.C9            | NFX1-type zinc finger-containing protein 1.; n=1; Takifugu rubripes                                                                                                                     |
| 39258 | -3.79 | 0.09 | 0.0004 | 0.0151 | 0.73 | all_v2.0.9983.C1            | NADH dehydrogenase [ubiquinone] 1 beta subcomplex subunit 1 (EC 1.6.5.3) (EC 1.6.99.3) (NADH-ubiquinone oxidoreductase MNLL subunit) (Complex I-MNLL) (CI-MNLL); n=1; Takifugu rubripes |
| 44663 | -4.76 | 0.06 | 0.0001 | 0.0061 | 0.73 | all_v2.0.7931.C1            | Drf_FH1 multi-domain protein                                                                                                                                                            |
| 51433 | -3.32 | 0.11 | 0.0011 | 0.0259 | 0.73 | all_v2.0.649.C1             | unclassified                                                                                                                                                                            |
| 37289 | -3.30 | 0.11 | 0.0011 | 0.0266 | 0.73 | sb_gmbbhkas_0019c20.pDNRF2  | G protein-coupled receptor 155; n=1; Takifugu rubripes                                                                                                                                  |
| 44550 | -3.88 | 0.09 | 0.0003 | 0.0136 | 0.73 | IRAK41                      | custom - interleukin-1 receptor-associated kinase 4                                                                                                                                     |
| 43052 | -3.65 | 0.10 | 0.0005 | 0.0168 | 0.73 | all_v2.0.17120.C1           | UPI0000D8DF8E related cluster; n=1; Danio rerio                                                                                                                                         |
| 40604 | -3.34 | 0.11 | 0.0011 | 0.0253 | 0.73 | sb_gmapte_0010i04.pDNRm13r  | PREDICTED: similar to KPL2; n=1; Ornithorhynchus anatinus                                                                                                                               |
| 43147 | -3.65 | 0.10 | 0.0005 | 0.0168 | 0.73 | all_v2.0.4262.C1            | Vacuolar ATP synthase subunit S1 precursor (EC 3.6.3.14) (V-ATPase subunit S1) (V-ATPase S1 accessory protein) (V-ATPase Ac45 subunit) (XAP-3); n=1; Takifugu rubripes                  |
| 45377 | -3.70 | 0.10 | 0.0005 | 0.0162 | 0.73 | all_v2.0.5627.C1            | Mak16 multi-domain protein                                                                                                                                                              |
| 47368 | -3.38 | 0.11 | 0.0009 | 0.0236 | 0.72 | sb_gmnlla_0036m01.t7        | Unassigned protein                                                                                                                                                                      |
| 49161 | -3.36 | 0.11 | 0.0010 | 0.0244 | 0.72 | all_v2.0.7045.C1            | unclassified                                                                                                                                                                            |
| 40263 | -3.81 | 0.09 | 0.0004 | 0.0146 | 0.72 | all_v2.0.661.C24            | PREDICTED: similar to bloodthirsty; n=3; Danio rerio                                                                                                                                    |
| 51306 | -3.41 | 0.11 | 0.0009 | 0.0226 | 0.72 | all_v2.0.8881.C1            | unclassified                                                                                                                                                                            |
| 52359 | -3.76 | 0.10 | 0.0004 | 0.0155 | 0.72 | all_v2.0.1914.C1            | unclassified                                                                                                                                                                            |
| 54212 | -3.37 | 0.11 | 0.0010 | 0.0242 | 0.72 | all_v2.0.14096.C1           | unclassified                                                                                                                                                                            |
| 39846 | -3.34 | 0.11 | 0.0011 | 0.0253 | 0.72 | all_v2.0.10280.C2           | Palmitoyl-protein thioesterase 1 precursor (EC 3.1.2.22) (PPT-1) (Palmitoyl-protein hydrolase 1);                                                                                       |

|       |       |      |        |        |      |                                                      |                                                                                                                                                                                                      |
|-------|-------|------|--------|--------|------|------------------------------------------------------|------------------------------------------------------------------------------------------------------------------------------------------------------------------------------------------------------|
|       |       |      |        |        |      |                                                      | n=1; Takifugu rubripes                                                                                                                                                                               |
| 43609 | -4.61 | 0.07 | 0.0001 | 0.0064 | 0.72 | sb_gmnbmd_00<br>04p22.t7                             | Zgc:136585; n=3; Danio rerio                                                                                                                                                                         |
| 44865 | -3.59 | 0.11 | 0.0006 | 0.0181 | 0.72 | all_v2.0.8362.C<br>1                                 | HERC5, LOC478474; hect domain and RLD 5                                                                                                                                                              |
| 49061 | -3.87 | 0.09 | 0.0003 | 0.0138 | 0.72 | all_v2.0.10961.<br>C1                                | unclassified                                                                                                                                                                                         |
| 49108 | -3.97 | 0.09 | 0.0003 | 0.0125 | 0.72 | all_v2.0.210.C1<br>sb_gmnbhkc_0<br>005d21.pDNRF<br>2 | unclassified                                                                                                                                                                                         |
| 47299 | -3.86 | 0.10 | 0.0003 | 0.0139 | 0.71 |                                                      | Unassigned protein                                                                                                                                                                                   |
| 44547 | -3.70 | 0.10 | 0.0005 | 0.0161 | 0.71 | IRF1OK5<br>all_v2.0.6525.C<br>1                      | custom - Interferon regulatory factor 10K<br>phosphatidylinositol-specific phospholipase C, X<br>domain containing 1; n=1; Takifugu rubripes                                                         |
| 39952 | -4.13 | 0.09 | 0.0002 | 0.0104 | 0.71 | all_v2.0.15318.<br>C1                                | histidine triad nucleotide binding protein 3; n=1;<br>Takifugu rubripes                                                                                                                              |
| 37631 | -3.52 | 0.12 | 0.0007 | 0.0197 | 0.70 |                                                      | DKEY-218F9.5, LOC571141; novel protein similar<br>to bloodthirsty (bty)                                                                                                                              |
| 44649 | -5.09 | 0.07 | 0.0000 | 0.0044 | 0.70 | all_v2.0.661.C6<br>sb_gmapov_002<br>9c16.pDNRF2      | Homolog of Brachydanio rerio Fem1c.; n=1;<br>Takifugu rubripes                                                                                                                                       |
| 37707 | -3.99 | 0.10 | 0.0002 | 0.0122 | 0.70 | all_v2.0.1697.C<br>1                                 | Splicing factor, arginine/serine-rich 11; n=3;<br>Cyprinidae                                                                                                                                         |
| 42362 | -5.02 | 0.07 | 0.0000 | 0.0047 | 0.70 |                                                      | PREDICTED: similar to Poly [ADP-ribose]<br>polymerase 14 (PARP-14) (B aggressive<br>lymphoma protein 2); n=1; Danio rerio                                                                            |
| 40844 | -3.44 | 0.13 | 0.0008 | 0.0219 | 0.69 | all_v2.0.8322.C<br>3                                 |                                                                                                                                                                                                      |
| 50515 | -3.51 | 0.12 | 0.0007 | 0.0201 | 0.69 | all_v2.0.7899.C<br>1                                 | unclassified                                                                                                                                                                                         |
| 42922 | -3.64 | 0.12 | 0.0005 | 0.0170 | 0.69 | sb_gmnlpras_00<br>01f12.t7                           | Ubiquitin; n=6; Eukaryota                                                                                                                                                                            |
| 52606 | -3.47 | 0.12 | 0.0008 | 0.0212 | 0.69 | all_v2.0.5996.C<br>2                                 | unclassified                                                                                                                                                                                         |
| 54589 | -3.27 | 0.13 | 0.0012 | 0.0274 | 0.69 | all_v2.0.12596.<br>C1                                | unclassified                                                                                                                                                                                         |
| 45375 | -3.27 | 0.14 | 0.0012 | 0.0275 | 0.69 | sb_gmnbmu_00<br>08h11.pDNRF2                         | Macro domain containing protein                                                                                                                                                                      |
| 48343 | -3.61 | 0.12 | 0.0006 | 0.0178 | 0.69 | sb_gmlbgits_00<br>03d14.sp6                          | Unassigned protein                                                                                                                                                                                   |
| 47982 | -3.78 | 0.11 | 0.0004 | 0.0151 | 0.69 | sb_gmapht_001<br>5h06.pDNRF2                         | Unassigned protein                                                                                                                                                                                   |
| 49472 | -5.72 | 0.06 | 0.0000 | 0.0034 | 0.68 | all_v2.0.12909.<br>C1                                | unclassified                                                                                                                                                                                         |
| 41103 | -3.61 | 0.12 | 0.0006 | 0.0178 | 0.68 | sb_gmnbhkc_0<br>006n17.pDNRF<br>2                    | PREDICTED: similar to transposase, partial; n=1;<br>Strongylocentrotus purpuratus                                                                                                                    |
| 50977 | -3.65 | 0.12 | 0.0005 | 0.0168 | 0.68 | all_v2.0.9975.C<br>1                                 | unclassified                                                                                                                                                                                         |
| 39626 | -4.65 | 0.09 | 0.0001 | 0.0062 | 0.68 | all_v2.0.4.CB27<br>all_v2.0.1797.C<br>1              | Novel protein; n=2; Danio rerio<br>PREDICTED: similar to thymosin, beta 4; n=1;<br>Canis lupus familiaris                                                                                            |
| 41068 | -3.83 | 0.11 | 0.0004 | 0.0143 | 0.68 | all_v2.0.1097.C<br>3                                 | Ferritin, heavy subunit; n=2; Salmonidae                                                                                                                                                             |
| 37203 | -3.71 | 0.12 | 0.0005 | 0.0161 | 0.68 |                                                      | unclassified                                                                                                                                                                                         |
| 53004 | -3.51 | 0.13 | 0.0007 | 0.0201 | 0.68 | all_v2.0.547.C1                                      | Homolog of Homo sapiens Mannosyl (Alpha-1,3-)-<br>glycoprotein beta-1,4-N-<br>acetylglucosaminyltransferase, isoenzyme B,<br>isoform 1; n=2; Clupeocephala                                           |
| 38155 | -4.31 | 0.10 | 0.0001 | 0.0089 | 0.68 | sb_gmapov_001<br>6d17.pDNRF2                         | unclassified                                                                                                                                                                                         |
| 50391 | -4.25 | 0.10 | 0.0002 | 0.0091 | 0.68 | all_v2.0.2069.C<br>2                                 | DNA-directed RNA polymerase I subunit RPA49<br>(RNA polymerase I-associated factor 53) (RNA<br>polymerase I polypeptide E) (RNA polymerase I-<br>associated factor 1) (A49).; n=1; Takifugu rubripes |
| 36901 | -6.72 | 0.05 | 0.0000 | 0.0028 | 0.68 | all_v2.0.5271.C<br>1                                 | unclassified                                                                                                                                                                                         |
| 55314 | -3.44 | 0.14 | 0.0008 | 0.0218 | 0.68 | all_v2.0.4690.C<br>2                                 | unclassified                                                                                                                                                                                         |
| 40337 | -3.59 | 0.13 | 0.0006 | 0.0182 | 0.68 | sb_gmnlbric_00<br>03k18.t7                           | PREDICTED: similar to cGMP phosphodiesterase<br>A2; n=1; Ornithorhynchus anatinus                                                                                                                    |
| 36185 | -4.35 | 0.10 | 0.0001 | 0.0088 | 0.68 | all_v2.0.661.C2                                      | Bloodthirsty; n=2; Notothenioidei                                                                                                                                                                    |

|       |       |      |        |        |      |                                                                                                                                                                       |
|-------|-------|------|--------|--------|------|-----------------------------------------------------------------------------------------------------------------------------------------------------------------------|
|       |       |      |        |        | 0    |                                                                                                                                                                       |
| 38073 | -3.60 | 0.13 | 0.0006 | 0.0180 | 0.67 | sb_gmnbspic_009c10.pDNRF2<br>Homolog of Homo sapiens G protein-coupled receptor 112; n=1; Takifugu rubripes                                                           |
| 37698 | -3.94 | 0.11 | 0.0003 | 0.0128 | 0.67 | sb_gmnbspic_001e04.pDNRFm13r<br>Homolog of Brachydanio rerio Cyclin L ania-6a.; n=2; Takifugu rubripes                                                                |
| 45232 | -3.74 | 0.13 | 0.0004 | 0.0157 | 0.67 | sb_gmapov_0010i17.pDNRFm13r<br>LOC607320; similar to NOL1/NOP2/Sun domain family, member 3                                                                            |
| 54777 | -4.56 | 0.10 | 0.0001 | 0.0068 | 0.67 | all_v2.0.3549.C1<br>unclassified                                                                                                                                      |
| 41397 | -3.57 | 0.14 | 0.0006 | 0.0184 | 0.67 | all_v2.0.847.C1<br>Prostaglandin E synthase 3; n=5; Danio rerio                                                                                                       |
| 48320 | -4.75 | 0.10 | 0.0001 | 0.0062 | 0.67 | all_v2.0.74.C2<br>Unassigned protein                                                                                                                                  |
| 51104 | -3.40 | 0.14 | 0.0009 | 0.0232 | 0.67 | all_v2.0.14207.C2<br>unclassified                                                                                                                                     |
| 44015 | -4.66 | 0.09 | 0.0001 | 0.0062 | 0.66 | all_v2.0.11085.C1<br>Zgc:86905; n=1; Danio rerio                                                                                                                      |
| 50132 | -5.27 | 0.08 | 0.0000 | 0.0040 | 0.66 | all_v2.0.6591.C1<br>unclassified                                                                                                                                      |
| 41526 | -4.44 | 0.10 | 0.0001 | 0.0082 | 0.66 | sb_gmapte_001n16.pDNRF2<br>Protein ripply1; n=2; Danio rerio                                                                                                          |
| 46430 | -4.69 | 0.10 | 0.0001 | 0.0062 | 0.66 | all_v2.0.14645.C1<br>Unassigned protein                                                                                                                               |
| 53454 | -3.69 | 0.13 | 0.0005 | 0.0162 | 0.66 | all_v2.0.10597.C1<br>unclassified                                                                                                                                     |
| 38160 | -4.07 | 0.12 | 0.0002 | 0.0113 | 0.66 | sb_gmnlsfic_0003i11.t7<br>Homolog of Homo sapiens Membrane interacting protein of RGS16; n=1; Takifugu rubripes                                                       |
| 36317 | -3.27 | 0.16 | 0.0012 | 0.0276 | 0.66 | all_v2.0.15280.C1<br>Carnitine palmitoyltransferase II; n=2; Danio rerio                                                                                              |
| 46576 | -5.86 | 0.07 | 0.0000 | 0.0032 | 0.66 | all_v2.0.4.C213<br>Unassigned protein                                                                                                                                 |
| 55349 | -4.03 | 0.12 | 0.0002 | 0.0119 | 0.66 | all_v2.0.8627.C1<br>unclassified                                                                                                                                      |
| 45980 | -3.61 | 0.13 | 0.0006 | 0.0179 | 0.66 | sb_gmnbsmd_0011d22.pDNRF2<br>PDZ domain containing 2 [Mus musculus]                                                                                                   |
| 35957 | -4.01 | 0.13 | 0.0002 | 0.0121 | 0.66 | all_v2.0.15919.C1<br>Apolipoprotein A-IV4; n=3; Takifugu rubripes                                                                                                     |
| 40720 | -4.34 | 0.11 | 0.0001 | 0.0088 | 0.65 | all_v2.0.13762.C1<br>PREDICTED: similar to Nipsnap1 protein; n=1; Monodelphis domestica                                                                               |
| 41899 | -5.17 | 0.09 | 0.0000 | 0.0042 | 0.65 | all_v2.0.16108.C1<br>Ribosomal protein L5b; n=1; Ictalurus punctatus                                                                                                  |
| 43437 | -3.51 | 0.14 | 0.0007 | 0.0201 | 0.65 | all_v2.0.18305.C1<br>Zgc:110373; n=2; Danio rerio                                                                                                                     |
| 41184 | -3.57 | 0.15 | 0.0006 | 0.0184 | 0.65 | sb_gmnlsfic_0007g21.t7<br>PREDICTED: similar to ubiquitin specific protease 24; n=2; Mus musculus                                                                     |
| 41088 | -4.73 | 0.10 | 0.0001 | 0.0062 | 0.65 | all_v2.0.3752.C1<br>PREDICTED: similar to transmembrane protein 7; n=1; Equus caballus                                                                                |
| 36409 | -3.56 | 0.15 | 0.0006 | 0.0188 | 0.65 | sb_gmapov_0017a02.pDNRF2<br>Cdc14a protein; n=4; Danio rerio                                                                                                          |
| 37498 | -3.45 | 0.14 | 0.0008 | 0.0217 | 0.65 | all_v2.0.3198.C3<br>GTP-binding nuclear protein Ran; n=35; Euteleostomi                                                                                               |
| 38075 | -5.30 | 0.09 | 0.0000 | 0.0040 | 0.65 | all_v2.0.18643.C1<br>Homolog of Homo sapiens G protein-coupled receptor 64; n=1; Takifugu rubripes                                                                    |
| 43197 | -4.18 | 0.13 | 0.0002 | 0.0099 | 0.64 | all_v2.0.3448.C4<br>VHSV-induced protein; n=1; Oncorhynchus mykiss                                                                                                    |
| 44544 | -4.42 | 0.11 | 0.0001 | 0.0082 | 0.64 | IRF10K2<br>custom - Interferon regulatory factor 10K                                                                                                                  |
| 48162 | -4.21 | 0.12 | 0.0002 | 0.0095 | 0.64 | sb_gmnlpbia_0002b13.t7<br>Unassigned protein                                                                                                                          |
| 42748 | -4.29 | 0.12 | 0.0001 | 0.0089 | 0.64 | all_v2.0.9596.C1<br>Transmembrane protein 7; n=1; Siniperca chuatsi cct5; chaperonin containing TCPI, subunit 5 (epsilon); K09497 T-complex protein 1 subunit epsilon |
| 44375 | -4.06 | 0.12 | 0.0002 | 0.0114 | 0.64 | all_v2.0.16663.C1<br>unclassified                                                                                                                                     |
| 41902 | -3.83 | 0.14 | 0.0004 | 0.0143 | 0.64 | all_v2.0.1081.C6<br>Ribosomal protein L9e; n=4; Endopterygota                                                                                                         |
| 51243 | -3.28 | 0.17 | 0.0012 | 0.0273 | 0.64 | all_v2.0.1415.C3<br>unclassified                                                                                                                                      |

|       |       |      |        |        |      |                                      |                                                                                                                                                                       |
|-------|-------|------|--------|--------|------|--------------------------------------|-----------------------------------------------------------------------------------------------------------------------------------------------------------------------|
| 46901 | -3.63 | 0.15 | 0.0005 | 0.0174 | 0.64 | all_v2.0.143.C1<br>all_v2.0.14926.C1 | Unassigned protein                                                                                                                                                    |
| 48258 | -3.66 | 0.15 | 0.0005 | 0.0168 | 0.64 | sb_gmnlkfas_00<br>02n19.t7           | Unassigned protein                                                                                                                                                    |
| 35793 | -3.28 | 0.17 | 0.0012 | 0.0274 | 0.64 | all_v2.0.6339.C1                     | Adenosine kinase a; n=2; Danio rerio                                                                                                                                  |
| 53852 | -5.05 | 0.10 | 0.0000 | 0.0047 | 0.64 | sb_gmnlbfc_00<br>07a23.t7            | unclassified                                                                                                                                                          |
| 36195 | -5.15 | 0.10 | 0.0000 | 0.0043 | 0.64 | all_v2.0.2012.C2                     | Bloodthirsty; n=2; Notothenioidei                                                                                                                                     |
| 54894 | -4.05 | 0.14 | 0.0002 | 0.0117 | 0.64 | all_v2.0.16740.C1                    | unclassified                                                                                                                                                          |
| 49932 | -4.36 | 0.12 | 0.0001 | 0.0087 | 0.63 | all_v2.0.2992.C2                     | unclassified                                                                                                                                                          |
| 55271 | -3.72 | 0.14 | 0.0004 | 0.0160 | 0.63 | all_v2.0.16283.C1                    | unclassified                                                                                                                                                          |
| 39974 | -4.42 | 0.12 | 0.0001 | 0.0082 | 0.63 | all_v2.0.7453.C2                     | Phospholipase D4 (EC 3.1.4.4) (PLD 4) (Choline phosphatase 4) (Phosphatidylcholine-hydrolyzing phospholipase D4); n=1; Takifugu rubripes                              |
| 36338 | -3.47 | 0.16 | 0.0008 | 0.0212 | 0.63 | sb_gmnlem_00<br>23e09.sp6            | Caspase-1; n=1; Dicentrarchus labrax coiled-coil domain containing 59; n=1; Takifugu rubripes                                                                         |
| 36556 | -4.63 | 0.11 | 0.0001 | 0.0063 | 0.63 | all_v2.0.661.C3<br>9                 | Bloodthirsty; n=2; Notothenioidei                                                                                                                                     |
| 36193 | -3.61 | 0.17 | 0.0006 | 0.0178 | 0.62 | all_v2.0.661.C2                      | Bloodthirsty; n=2; Notothenioidei                                                                                                                                     |
| 36186 | -4.80 | 0.11 | 0.0001 | 0.0058 | 0.62 | all_v2.0.3261.C1                     | Zgc:153659; n=3; Danio rerio                                                                                                                                          |
| 43698 | -3.48 | 0.18 | 0.0008 | 0.0210 | 0.62 | all_v2.0.8631.C1                     | unclassified                                                                                                                                                          |
| 55108 | -4.32 | 0.13 | 0.0001 | 0.0088 | 0.62 | all_v2.0.10071.C1                    | Uroporphyrinogen-III synthase (EC 4.2.1.75) (UROS) (Uroporphyrinogen-III cosynthetase) (Hydroxymethylbilane hydrolyase [cyclizing]) (UROIIIS); n=1; Takifugu rubripes |
| 43137 | -3.30 | 0.19 | 0.0012 | 0.0268 | 0.62 | sb_gmnbhkas_0<br>007119.pDNRF2       | Unassigned protein                                                                                                                                                    |
| 47158 | -5.84 | 0.09 | 0.0000 | 0.0032 | 0.62 | all_v2.0.9616.C1.a                   | non-directed                                                                                                                                                          |
| 45506 | -4.21 | 0.14 | 0.0002 | 0.0095 | 0.61 | all_v2.0.2090.C1                     | PREDICTED: similar to transposase; n=1; Danio rerio                                                                                                                   |
| 41116 | -5.00 | 0.11 | 0.0000 | 0.0048 | 0.61 | all_v2.0.8295.C1                     | unclassified                                                                                                                                                          |
| 52630 | -4.66 | 0.12 | 0.0001 | 0.0062 | 0.61 | sb_gmnbbtrts_0<br>003k13.pDNRF2      | Homolog of Gallus gallus Double-stranded RNA-activated protein kinase.; n=1; Takifugu rubripes                                                                        |
| 37904 | -4.00 | 0.15 | 0.0002 | 0.0121 | 0.61 | all_v2.0.3331.C1                     | unclassified                                                                                                                                                          |
| 53017 | -3.69 | 0.16 | 0.0005 | 0.0162 | 0.61 | sb_gmapht_003<br>7b08.pDNRF2         | bloodthirsty [Notothenia coriiceps]                                                                                                                                   |
| 44336 | -4.87 | 0.12 | 0.0000 | 0.0054 | 0.61 | sb_gmnblits_00<br>22m22.pDNRF2       | Transposase; n=27; Anopheles gambiae                                                                                                                                  |
| 42784 | -4.31 | 0.14 | 0.0001 | 0.0089 | 0.61 | all_v2.0.14839.C1                    | unclassified                                                                                                                                                          |
| 54819 | -3.65 | 0.17 | 0.0005 | 0.0168 | 0.61 | all_v2.0.6540.C1                     | Homolog of Homo sapiens Hemocentin; n=1; Takifugu rubripes                                                                                                            |
| 38095 | -4.31 | 0.13 | 0.0001 | 0.0088 | 0.61 | all_v2.0.6091.C2                     | Myc-regulated DEAD box protein; n=1; Oncorhynchus mykiss                                                                                                              |
| 39187 | -3.58 | 0.18 | 0.0006 | 0.0184 | 0.61 | all_v2.0.9799.C2                     | Transglutaminase; n=1; Oreochromis niloticus                                                                                                                          |
| 42678 | -3.71 | 0.16 | 0.0005 | 0.0160 | 0.61 | all_v2.0.5071.C1                     | Zgc:152953; n=2; Danio rerio                                                                                                                                          |
| 43642 | -4.65 | 0.12 | 0.0001 | 0.0062 | 0.61 | sb_gmnblits_00<br>13106.pDNRM1<br>3r | LOC568642; similar to elongation of very long chain fatty acids (FEN1/Elo2, SUR4/Elo3, yeast)-like 4                                                                  |
| 45180 | -3.52 | 0.18 | 0.0007 | 0.0197 | 0.61 | all_v2.0.17371.C1                    | unclassified                                                                                                                                                          |
| 52706 | -4.24 | 0.15 | 0.0002 | 0.0092 | 0.60 | all_v2.0.1645.C                      | Alkylated repair protein alkB homolog 5.; n=2;                                                                                                                        |
| 35854 | -3.72 | 0.17 | 0.0004 | 0.0160 | 0.60 |                                      |                                                                                                                                                                       |

|       |       |      |        |        |      | 1                                        | Gallus gallus                                                                                                                                                                                                                                                                    |
|-------|-------|------|--------|--------|------|------------------------------------------|----------------------------------------------------------------------------------------------------------------------------------------------------------------------------------------------------------------------------------------------------------------------------------|
| 44579 | -4.29 | 0.13 | 0.0001 | 0.0089 | 0.60 | 3MKK4_MAP2<br>K3                         | custom - Mitogen-activated protein kinase kinase 4                                                                                                                                                                                                                               |
| 47390 | -4.52 | 0.13 | 0.0001 | 0.0072 | 0.60 | sb_gmnlem_00<br>05d01.t7                 | Unassigned protein                                                                                                                                                                                                                                                               |
| 52084 | -4.28 | 0.15 | 0.0001 | 0.0089 | 0.60 | all_v2.0.4473.C<br>1                     | unclassified                                                                                                                                                                                                                                                                     |
| 41628 | -4.68 | 0.12 | 0.0001 | 0.0062 | 0.60 | all_v2.0.10802.<br>C1                    | Putative helicase MOV-10 (EC 3.6.1.-) (Moloney leukemia virus 10 protein); n=1; Takifugu rubripes                                                                                                                                                                                |
| 53189 | -3.36 | 0.20 | 0.0010 | 0.0244 | 0.60 | all_v2.0.11205.<br>C1                    | unclassified                                                                                                                                                                                                                                                                     |
| 48129 | -3.47 | 0.18 | 0.0008 | 0.0212 | 0.60 | all_v2.0.14003.<br>C1                    | Unassigned protein                                                                                                                                                                                                                                                               |
| 44665 | -3.69 | 0.17 | 0.0005 | 0.0162 | 0.60 | all_v2.0.13567.<br>C1                    | Drf_FH1 multi-domain protein<br>PREDICTED: similar to protein tyrosine phosphatase, receptor type, B; n=1; Ornithorhynchus anatinus                                                                                                                                              |
| 40891 | -4.85 | 0.12 | 0.0001 | 0.0054 | 0.60 | all_v2.0.15259.<br>C1                    | Unassigned protein                                                                                                                                                                                                                                                               |
| 47135 | -3.79 | 0.16 | 0.0004 | 0.0151 | 0.60 | all_v2.0.1651.C<br>1                     | Unassigned protein                                                                                                                                                                                                                                                               |
| 42931 | -6.05 | 0.09 | 0.0000 | 0.0032 | 0.60 | sb_gmnbbbr_001<br>5n03.pDNRm1<br>3r      | Ubiquitin-conjugating enzyme E2 L3; n=32; Euteleostomi                                                                                                                                                                                                                           |
| 54087 | -3.66 | 0.18 | 0.0005 | 0.0168 | 0.60 | all_v2.0.4115.C<br>1                     | unclassified                                                                                                                                                                                                                                                                     |
| 43485 | -3.44 | 0.19 | 0.0008 | 0.0218 | 0.60 | all_v2.0.4514.C<br>4                     | Zgc:112050; n=2; Danio rerio<br>Ubiquitin-conjugating enzyme E2 D4; n=11; Euteleostomi                                                                                                                                                                                           |
| 42929 | -3.37 | 0.19 | 0.0010 | 0.0240 | 0.60 | all_v2.0.473.C1<br>all_v2.0.10159.<br>C1 | S100-like protein; n=1; Monopterus albus                                                                                                                                                                                                                                         |
| 41997 | -3.88 | 0.17 | 0.0003 | 0.0136 | 0.59 | all_v2.0.999.C1<br>all_v2.0.7668.C<br>1  | unclassified                                                                                                                                                                                                                                                                     |
| 52910 | -3.41 | 0.20 | 0.0009 | 0.0226 | 0.59 | all_v2.0.16939.<br>C1                    | prospero homeobox 2; n=1; Takifugu rubripes<br>Aminopeptidase N; n=2; Pseudopleuronectes americanus                                                                                                                                                                              |
| 41395 | -3.92 | 0.16 | 0.0003 | 0.0130 | 0.59 | all_v2.0.4285.C<br>1                     | unclassified                                                                                                                                                                                                                                                                     |
| 35894 | -3.87 | 0.17 | 0.0003 | 0.0137 | 0.59 | all_v2.0.7062.C<br>1                     | Interferon stimulated gene 15; n=1; Gadus morhua                                                                                                                                                                                                                                 |
| 54462 | -3.95 | 0.16 | 0.0003 | 0.0128 | 0.59 | all_v2.0.17016.<br>C1                    | unclassified                                                                                                                                                                                                                                                                     |
| 38607 | -3.53 | 0.19 | 0.0007 | 0.0197 | 0.59 | sb_gmapov_001<br>8109.pDNRf2             | Novel protein similar to vertebrate phosphoribosyl pyrophosphate amidotransferase; n=3; Danio rerio<br>LOC501925; similar to solute carrier family 2, member 9 isoform a; K08146 MFS transporter, SP family, solute carrier family 2 (facilitated glucose transporter), member 9 |
| 50272 | -3.68 | 0.20 | 0.0005 | 0.0165 | 0.58 | all_v2.0.13960.<br>C1                    | UPI0000D8BA1C related cluster; n=1; Danio rerio                                                                                                                                                                                                                                  |
| 39505 | -3.55 | 0.20 | 0.0006 | 0.0189 | 0.58 | all_v2.0.9212.C<br>1                     | Unassigned protein                                                                                                                                                                                                                                                               |
| 45123 | -3.38 | 0.20 | 0.0010 | 0.0236 | 0.58 | all_v2.0.14003.<br>C2                    | unclassified                                                                                                                                                                                                                                                                     |
| 43012 | -5.06 | 0.12 | 0.0000 | 0.0047 | 0.58 | all_v2.0.1095.C<br>1                     | unclassified                                                                                                                                                                                                                                                                     |
| 47847 | -3.66 | 0.19 | 0.0005 | 0.0168 | 0.57 | sb_gmnbpcc_0<br>011h19.pDNR<br>m13r      | UPI00015A65AA related cluster; n=1; Danio rerio                                                                                                                                                                                                                                  |
| 51325 | -4.59 | 0.15 | 0.0001 | 0.0065 | 0.57 | all_v2.0.10276.<br>C1                    | Unassigned protein                                                                                                                                                                                                                                                               |
| 43109 | -4.27 | 0.16 | 0.0001 | 0.0090 | 0.57 | all_v2.0.7149.C<br>2                     | Unassigned protein                                                                                                                                                                                                                                                               |
| 47485 | -3.40 | 0.21 | 0.0009 | 0.0232 | 0.57 | sb_gmapht_001<br>0p17.pDNRf2             | Homolog of Homo sapiens TiTin isoform novex-2; n=1; Takifugu rubripes                                                                                                                                                                                                            |
| 48810 | -5.45 | 0.12 | 0.0000 | 0.0038 | 0.57 | all_v2.0.10916.<br>C1                    | unclassified                                                                                                                                                                                                                                                                     |
| 38411 | -3.72 | 0.19 | 0.0004 | 0.0160 | 0.57 | sb_gmnbhkas_0<br>008c11.pDNRf<br>2       | Transport-associated protein; n=3; Salmonidae                                                                                                                                                                                                                                    |
| 52488 | -3.41 | 0.22 | 0.0009 | 0.0226 | 0.57 |                                          |                                                                                                                                                                                                                                                                                  |
| 42754 | -5.50 | 0.12 | 0.0000 | 0.0037 | 0.57 |                                          |                                                                                                                                                                                                                                                                                  |



|       |       |      |        |        |      |                            |                                                                                                                                                                     |
|-------|-------|------|--------|--------|------|----------------------------|---------------------------------------------------------------------------------------------------------------------------------------------------------------------|
| 51353 | -5.27 | 0.12 | 0.0000 | 0.0040 | 0.57 | all_v2.0.10898.C1          | unclassified                                                                                                                                                        |
| 44517 | -3.41 | 0.22 | 0.0009 | 0.0226 | 0.57 | FAAD4c                     | custom - Fas (TNFRSF6)-associated via death domain                                                                                                                  |
| 45143 | -5.65 | 0.12 | 0.0000 | 0.0034 | 0.57 | all_v2.0.8322.C2           | LOC540789; similar to poly (ADP-ribose) polymerase family, member 14                                                                                                |
| 52608 | -3.68 | 0.18 | 0.0005 | 0.0165 | 0.57 | all_v2.0.5157.C1           | unclassified                                                                                                                                                        |
| 37946 | -3.30 | 0.23 | 0.0012 | 0.0268 | 0.56 | all_v2.0.2234.C1           | Homolog of Gallus gallus Voltage-dependent anion channel.; n=1; Takifugu rubripes                                                                                   |
| 51681 | -3.31 | 0.21 | 0.0011 | 0.0266 | 0.56 | all_v2.0.9964.C1           | unclassified                                                                                                                                                        |
| 36339 | -4.32 | 0.16 | 0.0001 | 0.0088 | 0.56 | all_v2.0.7453.C3           | Caspase-1; n=1; Dicentrarchus labrax                                                                                                                                |
| 47050 | -4.52 | 0.16 | 0.0001 | 0.0072 | 0.56 | sb_gmapte_0012e14.pDNRF2   | Unassigned protein                                                                                                                                                  |
| 41920 | -3.76 | 0.19 | 0.0004 | 0.0155 | 0.56 | sb_gmapov_0012104.pDNRF2   | Ribulose-5-phosphate-3-epimerase; n=1; Danio rerio                                                                                                                  |
| 36190 | -3.58 | 0.21 | 0.0006 | 0.0183 | 0.56 | sb_gmapht_0014i15.pDNRF2   | Bloodthirsty; n=2; Notothenioidei                                                                                                                                   |
| 45146 | -3.91 | 0.19 | 0.0003 | 0.0132 | 0.56 | sb_gmbhkc_0005i22.pDNRm13r | LOC555735; similar to DNA methyltransferase                                                                                                                         |
| 47640 | -5.21 | 0.13 | 0.0000 | 0.0042 | 0.56 | sb_gmbhkc_0015i18.pDNRm13r | Unassigned protein                                                                                                                                                  |
| 38352 | -4.29 | 0.18 | 0.0001 | 0.0089 | 0.56 | all_v2.0.272.C2            | Homolog of Homo sapiens SOUL protein; n=1; Takifugu rubripes                                                                                                        |
| 43192 | -3.92 | 0.20 | 0.0003 | 0.0130 | 0.56 | sb_gmnlbric_0006j07.t7     | Vesicular glutamate transporter 2.2; n=3; Danio rerio                                                                                                               |
| 38788 | -4.78 | 0.14 | 0.0001 | 0.0060 | 0.56 | all_v2.0.1155.C2           | Lily-type lectin; n=1; Platycephalus indicus<br>PREDICTED: similar to Poly [ADP-ribose] polymerase 14 (PARP-14) (B aggressive lymphoma protein 2); n=1; Danio rerio |
| 40847 | -5.26 | 0.13 | 0.0000 | 0.0040 | 0.56 | all_v2.0.8322.C1           | NFX1-type zinc finger-containing protein 1.; n=1; Takifugu rubripes                                                                                                 |
| 39325 | -6.36 | 0.10 | 0.0000 | 0.0028 | 0.55 | all_v2.0.9595.C2           | Cytotoxic and regulatory T cell protein; n=1; Oncorhynchus mykiss                                                                                                   |
| 36797 | -4.72 | 0.15 | 0.0001 | 0.0062 | 0.55 | all_v2.0.2166.C2           | Gravin; n=2; Danio rerio                                                                                                                                            |
| 37475 | -3.35 | 0.22 | 0.0010 | 0.0246 | 0.55 | all_v2.0.11071.C1          | Protein MAK10 homolog; n=4; Clupeocephala                                                                                                                           |
| 41492 | -5.40 | 0.13 | 0.0000 | 0.0039 | 0.55 | sb_gmnbgi_0004b13.pDNRF2   | custom - Interferon regulatory factor 10K                                                                                                                           |
| 44545 | -3.27 | 0.22 | 0.0012 | 0.0276 | 0.55 | IRF1OK3                    | unclassified                                                                                                                                                        |
| 54421 | -4.98 | 0.15 | 0.0000 | 0.0050 | 0.55 | all_v2.0.1129.C1           | Interferon stimulated gene 15; n=1; Gadus morhua                                                                                                                    |
| 38612 | -3.64 | 0.22 | 0.0005 | 0.0170 | 0.55 | all_v2.0.14.CB3            | Interferon regulatory factor 1; n=1; Channa argus                                                                                                                   |
| 38598 | -3.97 | 0.20 | 0.0003 | 0.0125 | 0.55 | all_v2.0.1580.C7           | Isoform 2 of Q5RI56 ; n=2; Danio rerio                                                                                                                              |
| 38670 | -5.14 | 0.14 | 0.0000 | 0.0043 | 0.55 | all_v2.0.3891.C1           | Unassigned protein                                                                                                                                                  |
| 46586 | -4.58 | 0.16 | 0.0001 | 0.0065 | 0.54 | sb_gmnlem_0013j07.sp6      | custom - Interferon regulatory factor 10K                                                                                                                           |
| 44546 | -5.02 | 0.14 | 0.0000 | 0.0047 | 0.54 | IRF1OK4                    | PREDICTED: similar to mitochondrial carrier triple repeat 6; n=1; Monodelphis domestica                                                                             |
| 40670 | -3.88 | 0.21 | 0.0003 | 0.0136 | 0.54 | all_v2.0.14446.C1          | LOC793474; similar to stonustoxin alpha-subunit                                                                                                                     |
| 45349 | -4.21 | 0.18 | 0.0002 | 0.0095 | 0.54 | all_v2.0.16273.C1          | LOC793817; similar to pol polyprotein                                                                                                                               |
| 45352 | -3.28 | 0.24 | 0.0012 | 0.0274 | 0.54 | sb_gmnbmd_0007i19.pDNRF2   | Unassigned protein                                                                                                                                                  |
| 48304 | -3.85 | 0.19 | 0.0003 | 0.0142 | 0.54 | sb_gmnl1a_0024h22.t7       | LOC561785; similar to very large inducible GTPase 1                                                                                                                 |
| 45162 | -4.39 | 0.18 | 0.0001 | 0.0085 | 0.54 | all_v2.0.7368.C2           | Beta-ureidopropionase (EC 3.5.1.6) (Beta-alanine synthase) (N- carbamoyl-beta-alanine amidohydrolase) (BUP-1).; n=1; Takifugu rubripes                              |
| 36160 | -3.72 | 0.23 | 0.0004 | 0.0160 | 0.54 | all_v2.0.6011.C2           | custom - viperin                                                                                                                                                    |
| 44624 | -4.49 | 0.18 | 0.0001 | 0.0074 | 0.53 | Codviperin1                |                                                                                                                                                                     |

|       |       |      |        |        |      |                              |                                                                                                                                                                                         |
|-------|-------|------|--------|--------|------|------------------------------|-----------------------------------------------------------------------------------------------------------------------------------------------------------------------------------------|
| 50298 | -5.18 | 0.14 | 0.0000 | 0.0042 | 0.53 | all_v2.0.17232.C1            | unclassified                                                                                                                                                                            |
| 54199 | -3.99 | 0.19 | 0.0003 | 0.0122 | 0.53 | all_v2.0.7185.C1             | unclassified                                                                                                                                                                            |
| 46402 | -4.40 | 0.19 | 0.0001 | 0.0084 | 0.53 | sb_gmapht_0004b19.pDNRm13r   | TTN; cardiac titin                                                                                                                                                                      |
| 47761 | -8.34 | 0.08 | 0.0000 | 0.0026 | 0.53 | all_v2.0.7777.C1             | Unassigned protein                                                                                                                                                                      |
| 42860 | -4.06 | 0.20 | 0.0002 | 0.0114 | 0.52 | all_v2.0.7093.C1             | Type II inositol-1,4,5-trisphosphate 5-phosphatase precursor (EC 3.1.3.36) (Phosphoinositide 5-phosphatase) (5PTase) (75 kDa inositol polyphosphate-5-phosphatase).; n=2; Gallus gallus |
| 43939 | -4.00 | 0.21 | 0.0002 | 0.0121 | 0.52 | all_v2.0.2274.C1             | Zgc:73351; n=1; Danio rerio<br>Single-stranded DNA-binding protein, mitochondrial precursor (Mt-SSB) (PWPI-interacting protein 17).; n=1; Takifugu rubripes                             |
| 42223 | -3.78 | 0.23 | 0.0004 | 0.0152 | 0.52 | all_v2.0.3958.C1             | CK2c1<br>custom - CC chemokine                                                                                                                                                          |
| 44458 | -3.29 | 0.25 | 0.0012 | 0.0273 | 0.52 | all_v2.0.2805.C1             | caspc; caspase c                                                                                                                                                                        |
| 44371 | -3.90 | 0.20 | 0.0003 | 0.0134 | 0.52 | all_v2.0.7062.C2             | Interferon stimulated gene 15; n=1; Gadus morhua                                                                                                                                        |
| 38614 | -4.35 | 0.20 | 0.0001 | 0.0088 | 0.52 | sb_gmnbhkc_0019j15.pDNRF2    | PREDICTED: similar to Poly [ADP-ribose] polymerase 14 (PARP-14) (B aggressive lymphoma protein 2), partial [Danio rerio]                                                                |
| 46051 | -8.12 | 0.09 | 0.0000 | 0.0026 | 0.52 | all_v2.0.16620.C1            | Claudin 30; n=1; Oreochromis mossambicus                                                                                                                                                |
| 36525 | -3.92 | 0.20 | 0.0003 | 0.0130 | 0.52 | all_v2.0.11065.C1            | Zgc:111879 protein; n=4; Danio rerio                                                                                                                                                    |
| 43476 | -6.42 | 0.12 | 0.0000 | 0.0028 | 0.52 | sb_gmnbspic_0009m06.pDNRm13r | Unassigned protein                                                                                                                                                                      |
| 48557 | -3.99 | 0.20 | 0.0002 | 0.0121 | 0.52 | all_v2.0.11166.C1            | unclassified                                                                                                                                                                            |
| 51629 | -4.17 | 0.21 | 0.0002 | 0.0100 | 0.51 | all_v2.0.5240.C2             | Novel protein; n=3; Danio rerio                                                                                                                                                         |
| 39658 | -3.57 | 0.26 | 0.0006 | 0.0185 | 0.50 | all_v2.0.6027.C6             | Unassigned protein                                                                                                                                                                      |
| 47164 | -3.51 | 0.26 | 0.0007 | 0.0201 | 0.50 | sb_gmnblits_0018p08.pDNRF2   | RFK protein; n=2; Bos taurus                                                                                                                                                            |
| 41829 | -6.58 | 0.12 | 0.0000 | 0.0028 | 0.50 | all_v2.0.12475.C1            | unclassified                                                                                                                                                                            |
| 51171 | -3.36 | 0.31 | 0.0010 | 0.0244 | 0.50 | all_v2.0.12194.C1            | Unassigned protein                                                                                                                                                                      |
| 46423 | -3.71 | 0.23 | 0.0005 | 0.0161 | 0.50 | all_v2.0.8502.C1             | Zinc finger CCHC domain-containing protein 9; n=1; Takifugu rubripes                                                                                                                    |
| 44123 | -4.26 | 0.20 | 0.0002 | 0.0091 | 0.49 | all_v2.0.3263.C1             | unclassified                                                                                                                                                                            |
| 49575 | -5.94 | 0.15 | 0.0000 | 0.0032 | 0.49 | all_v2.0.14158.C1            | PREDICTED: similar to Snf2-related CBP activator protein; n=1; Mus musculus                                                                                                             |
| 41014 | -4.51 | 0.21 | 0.0001 | 0.0072 | 0.49 | all_v2.0.4387.C1             | PREDICTED: similar to mKIAA1931 protein; n=1; Monodelphis domestica                                                                                                                     |
| 40679 | -4.62 | 0.20 | 0.0001 | 0.0064 | 0.48 | all_v2.0.6954.C2             | unclassified                                                                                                                                                                            |
| 52069 | -6.32 | 0.14 | 0.0000 | 0.0028 | 0.48 | all_v2.0.5978.C1             | unclassified                                                                                                                                                                            |
| 51371 | -4.68 | 0.21 | 0.0001 | 0.0062 | 0.48 | all_v2.0.4732.C1             | unclassified                                                                                                                                                                            |
| 49723 | -5.74 | 0.16 | 0.0000 | 0.0034 | 0.48 | DXH3a                        | custom - probable ATP-dependent RNA helicase DHX                                                                                                                                        |
| 44587 | -4.00 | 0.25 | 0.0002 | 0.0121 | 0.48 | all_v2.0.5598.C2             | Probable ATP-dependent helicase LGP2 (EC 3.6.1.-) (Protein D11Lgp2 homolog).; n=1; Takifugu rubripes                                                                                    |
| 41315 | -3.69 | 0.26 | 0.0005 | 0.0162 | 0.48 | sb_gmnsl1_0001h03.pDNRF2     | Unassigned protein                                                                                                                                                                      |
| 47806 | -3.93 | 0.26 | 0.0003 | 0.0130 | 0.47 | all_v2.0.1410.C1             | unclassified                                                                                                                                                                            |
| 51636 | -4.06 | 0.25 | 0.0002 | 0.0114 | 0.47 |                              |                                                                                                                                                                                         |

|       |       |      |        |        |      |                                                       |                                                                                                                          |
|-------|-------|------|--------|--------|------|-------------------------------------------------------|--------------------------------------------------------------------------------------------------------------------------|
| 49008 | -5.59 | 0.17 | 0.0000 | 0.0034 | 0.47 | sb_gmnl1a_000<br>2h23.t7                              | Unassigned protein                                                                                                       |
| 41269 | -4.31 | 0.25 | 0.0001 | 0.0088 | 0.46 | sb_gmnlbfc_00<br>04o20.t7                             | PREDICTED: similar to zinc finger, NFX1-type<br>containing 1; n=3; Laurasiatheria                                        |
| 40397 | -3.28 | 0.30 | 0.0012 | 0.0273 | 0.46 | all_v2.0.6028.C<br>2                                  | PREDICTED: similar to dextex 3-like (Drosophila);<br>n=1; Danio rerio                                                    |
| 43596 | -3.57 | 0.26 | 0.0006 | 0.0185 | 0.46 | all_v2.0.8338.C<br>1                                  | Zgc:136229; n=4; Danio rerio                                                                                             |
| 48537 | -3.82 | 0.30 | 0.0004 | 0.0146 | 0.45 | sb_gmnbhkas_0<br>017n11.pDNR<br>m13r                  | Unassigned protein                                                                                                       |
| 49317 | -5.60 | 0.18 | 0.0000 | 0.0034 | 0.45 | all_v2.0.13805.<br>C1                                 | unclassified                                                                                                             |
| 55051 | -4.25 | 0.23 | 0.0002 | 0.0091 | 0.45 | all_v2.0.9309.C<br>1                                  | unclassified                                                                                                             |
| 39077 | -5.86 | 0.17 | 0.0000 | 0.0032 | 0.44 | all_v2.0.431.C7<br>sb_gmnbgi_000<br>7a11.pDNRm13<br>r | Microtubule aggregate protein homolog; n=1;<br>Perca flavescens                                                          |
| 47827 | -4.89 | 0.22 | 0.0000 | 0.0053 | 0.44 | all_v2.0.2666.C<br>5                                  | Unassigned protein                                                                                                       |
| 43557 | -7.66 | 0.12 | 0.0000 | 0.0028 | 0.44 | IRF1OK1                                               | Zgc:113527; n=4; Danio rerio                                                                                             |
| 44543 | -4.14 | 0.26 | 0.0002 | 0.0102 | 0.44 | DXH1a                                                 | custom - Interferon regulatory factor 10K<br>custom - probable ATP-dependent RNA helicase<br>DHX                         |
| 44584 | -3.47 | 0.35 | 0.0008 | 0.0212 | 0.44 | all_v2.0.894.C5<br>all_v2.0.11455.<br>C1              | Homolog of Homo sapiens Deoxyribonuclease<br>gamma precursor; n=1; Takifugu rubripes                                     |
| 38042 | -3.50 | 0.36 | 0.0007 | 0.0206 | 0.44 | all_v2.0.314.C1                                       | unclassified                                                                                                             |
| 51818 | -3.59 | 0.36 | 0.0006 | 0.0181 | 0.43 | CK10ad                                                | HECT domain containing protein                                                                                           |
| 44859 | -7.40 | 0.14 | 0.0000 | 0.0028 | 0.43 | sb_gmnbhkas_0<br>002117.pDNRF<br>2                    | custom - CC chemokine                                                                                                    |
| 44448 | -3.42 | 0.36 | 0.0009 | 0.0223 | 0.43 | all_v2.0.2709.C<br>1                                  | Unassigned protein                                                                                                       |
| 47049 | -3.88 | 0.28 | 0.0003 | 0.0136 | 0.43 | all_v2.0.7444.C<br>1                                  | unclassified                                                                                                             |
| 52906 | -5.82 | 0.18 | 0.0000 | 0.0032 | 0.42 | all_v2.0.5598.C<br>1                                  | unclassified                                                                                                             |
| 50281 | -3.73 | 0.33 | 0.0004 | 0.0159 | 0.42 | all_v2.0.9330.C<br>1                                  | unclassified                                                                                                             |
| 41314 | -3.74 | 0.35 | 0.0004 | 0.0157 | 0.41 | sb_gmnlrsas_00<br>03g09.t7                            | Probable ATP-dependent helicase LGP2 (EC<br>3.6.1.-) (Protein D11Lgp2 homolog).; n=1;<br>Takifugu rubripes               |
| 43201 | -4.10 | 0.29 | 0.0002 | 0.0108 | 0.41 | all_v2.0.2213.C<br>1                                  | Viperin-like protein; n=1; Channa argus                                                                                  |
| 35753 | -4.28 | 0.28 | 0.0001 | 0.0090 | 0.41 | all_v2.0.1074.C<br>1                                  | Actin-binding vascular maintenance protein; n=5;<br>Danio rerio                                                          |
| 39328 | -5.73 | 0.20 | 0.0000 | 0.0034 | 0.41 | all_v2.0.1767.C<br>1                                  | NFX1-type zinc finger-containing protein 1; n=5;<br>Eutheria                                                             |
| 39328 | -5.73 | 0.20 | 0.0000 | 0.0034 | 0.41 | all_v2.0.1074.C<br>1                                  | unclassified                                                                                                             |
| 50467 | -3.26 | 0.44 | 0.0013 | 0.0280 | 0.41 | sb_gmnbhkc_0<br>012124.pDNRF<br>2                     | Interferon stimulated gene 15; n=1; Gadus morhua                                                                         |
| 38611 | -3.48 | 0.41 | 0.0008 | 0.0209 | 0.40 | all_v2.0.2666.C<br>4                                  | Secernin 3; n=3; Tetraodontidae                                                                                          |
| 38611 | -3.48 | 0.41 | 0.0008 | 0.0209 | 0.40 | all_v2.0.1010.C<br>8                                  | Poly [ADP-ribose] polymerase 15 (EC 2.4.2.30)<br>(PARP-15) (B-aggressive lymphoma protein 3).;<br>n=1; Takifugu rubripes |
| 42028 | -4.00 | 0.29 | 0.0002 | 0.0121 | 0.40 | all_v2.0.14.CB4                                       | LOC793474; similar to stonustoxin alpha-subunit                                                                          |
| 40054 | -5.82 | 0.20 | 0.0000 | 0.0032 | 0.40 | all_v2.0.14.CB7                                       | Interferon stimulated gene 15; n=1; Gadus morhua                                                                         |
| 45351 | -4.10 | 0.33 | 0.0002 | 0.0108 | 0.40 | all_v2.0.4472.C<br>1                                  | Interferon stimulated gene 15; n=1; Gadus morhua                                                                         |
| 38606 | -5.63 | 0.22 | 0.0000 | 0.0034 | 0.40 | all_v2.0.14.C13                                       | unclassified                                                                                                             |
| 38603 | -5.68 | 0.22 | 0.0000 | 0.0034 | 0.39 | all_v2.0.14.C12                                       | Interferon stimulated gene 15; n=1; Gadus morhua                                                                         |
| 52407 | -4.35 | 0.30 | 0.0001 | 0.0088 | 0.39 | all_v2.0.14.C3                                        | Interferon stimulated gene 15; n=1; Gadus morhua                                                                         |
| 38605 | -5.37 | 0.24 | 0.0000 | 0.0039 | 0.39 |                                                       |                                                                                                                          |
| 38608 | -6.15 | 0.20 | 0.0000 | 0.0028 | 0.38 |                                                       |                                                                                                                          |
| 38609 | -5.80 | 0.23 | 0.0000 | 0.0032 | 0.37 |                                                       |                                                                                                                          |

|       |       |      |        |        |      |                                     |                                                                                                           |
|-------|-------|------|--------|--------|------|-------------------------------------|-----------------------------------------------------------------------------------------------------------|
| 47613 | -5.59 | 0.23 | 0.0000 | 0.0034 | 0.37 | sb_gmnbbbr_001<br>3m15.pDNRm1<br>3r | Unassigned protein                                                                                        |
| 47376 | -3.73 | 0.34 | 0.0004 | 0.0159 | 0.37 | all_v2.0.15415.<br>C1               | Unassigned protein                                                                                        |
| 41316 | -3.45 | 0.47 | 0.0008 | 0.0217 | 0.37 | all_v2.0.1009.C<br>5                | Probable ATP-dependent helicase LGP2 (EC<br>3.6.1.-) (Protein D11Lgp2 homolog); n=1;<br>Takifugu rubripes |
| 55535 | -4.75 | 0.29 | 0.0001 | 0.0062 | 0.37 | all_v2.0.15359.<br>C1               | zp3a.1; zona pellucida glycoprotein 3a.1                                                                  |
| 44283 | -4.35 | 0.29 | 0.0001 | 0.0088 | 0.35 | sb_gmnlmfta_0<br>004i04.t7          | ARL6IP6; ADP-ribosylation-like factor 6<br>interacting protein 6                                          |
| 47410 | -4.86 | 0.29 | 0.0000 | 0.0054 | 0.35 | sb_gmnlstfc_00<br>04h02.t7          | Unassigned protein                                                                                        |
| 49247 | -5.48 | 0.26 | 0.0000 | 0.0038 | 0.35 | all_v2.0.7226.C<br>1                | unclassified<br>custom - probable ATP-dependent RNA helicase                                              |
| 44588 | -4.23 | 0.38 | 0.0002 | 0.0093 | 0.34 | DXH2b                               | DHX                                                                                                       |
| 41043 | -4.03 | 0.41 | 0.0002 | 0.0119 | 0.34 | all_v2.0.1010.C<br>10               | PREDICTED: similar to stonustoxin alpha-subunit;<br>n=3; Danio rerio                                      |
| 40667 | -6.31 | 0.23 | 0.0000 | 0.0028 | 0.33 | all_v2.0.431.C8                     | PREDICTED: similar to microtubule aggregate<br>protein homolog; n=2; Danio rerio                          |
| 38604 | -6.23 | 0.23 | 0.0000 | 0.0028 | 0.33 | all_v2.0.14.CB2                     | Interferon stimulated gene 15; n=1; Gadus morhua                                                          |
| 45583 | -5.25 | 0.28 | 0.0000 | 0.0040 | 0.32 | all_v2.0.2772.C<br>15               | non-directed                                                                                              |
| 49585 | -5.10 | 0.30 | 0.0000 | 0.0044 | 0.31 | all_v2.0.115.C1                     | unclassified                                                                                              |
| 42073 | -6.66 | 0.23 | 0.0000 | 0.0028 | 0.31 | all_v2.0.15254.<br>C1               | Serine hydrolase-like protein 2 (EC 3.1.-.-); n=1;<br>Takifugu rubripes                                   |
| 38675 | -3.55 | 0.57 | 0.0007 | 0.0190 | 0.29 | all_v2.0.9761.C<br>1                | Isoform S of Q76IC6 ; n=1; Rattus norvegicus                                                              |
| 47462 | -4.31 | 0.44 | 0.0001 | 0.0088 | 0.29 | sb_gmnbhkas_0<br>017n11.pDNRF<br>2  | Unassigned protein                                                                                        |
| 38651 | -5.12 | 0.32 | 0.0000 | 0.0044 | 0.29 | sb_gmapht_002<br>3a03.pDNRF2        | Intraflagellar transport protein 52; n=4; Danio rerio                                                     |
| 47445 | -3.67 | 0.46 | 0.0005 | 0.0165 | 0.27 | sb_gmnbmd_00<br>04h11.t7            | Unassigned protein                                                                                        |
| 38613 | -4.13 | 0.41 | 0.0002 | 0.0104 | 0.26 | all_v2.0.14.CB5                     | Interferon stimulated gene 15; n=1; Gadus morhua                                                          |
| 44180 | -6.24 | 0.35 | 0.0000 | 0.0028 | 0.20 | all_v2.0.1266.C<br>1                | ZPC4; n=2; Oryzias latipes                                                                                |
| 38638 | -5.94 | 0.42 | 0.0000 | 0.0032 | 0.18 | all_v2.0.638.C1                     | Interleukin-8 variant 2; n=3; Ictalurus punctatus                                                         |
| 38639 | -7.49 | 0.33 | 0.0000 | 0.0028 | 0.16 | all_v2.0.638.CB<br>1                | Interleukin-8 variant 2; n=3; Ictalurus punctatus                                                         |
| 45361 | -6.47 | 0.39 | 0.0000 | 0.0028 | 0.15 | all_v2.0.34.C2                      | LOC797694; similar to solute carrier family 25<br>member 5 protein                                        |

<sup>a</sup>Fold-changes are presented as outputted by siggenes and were calculated as 16°C/10°C

Supplemental Table S9. 96 genes reproducibly significantly differentially expressed between fish injected with pIC at 10°C and 16°C and sampled at 6HPI and fish injected with pIC at 10°C and 16°C and sampled at 24HPI

| Probe ID | Gene Name                                                                                                                                                                                  | Fold-Change <sup>a</sup><br>6HPI | Fold-Change <sup>a</sup><br>24HPI |
|----------|--------------------------------------------------------------------------------------------------------------------------------------------------------------------------------------------|----------------------------------|-----------------------------------|
| 35894    | Aminopeptidase N; n=2; Pseudopleuronectes americanus                                                                                                                                       | 1.43                             | 0.59                              |
| 44283    | ARL6IP6; ADP-ribosylation-like factor 6 interacting protein 6                                                                                                                              | 2.10                             | 0.35                              |
| 44336    | bloodthirsty [Notothenia coriiceps]                                                                                                                                                        | 2.44                             | 0.61                              |
| 36193    | Bloodthirsty; n=2; Notothenioidei                                                                                                                                                          | 1.67                             | 0.62                              |
| 36190    | Bloodthirsty; n=2; Notothenioidei                                                                                                                                                          | 2.05                             | 0.56                              |
| 36195    | Bloodthirsty; n=2; Notothenioidei                                                                                                                                                          | 2.11                             | 0.64                              |
| 36185    | Bloodthirsty; n=2; Notothenioidei                                                                                                                                                          | 2.01                             | 0.68                              |
| 36186    | Bloodthirsty; n=2; Notothenioidei                                                                                                                                                          | 2.17                             | 0.62                              |
| 36317    | Carnitine palmitoyltransferase II; n=2; Danio rerio                                                                                                                                        | 1.92                             | 0.66                              |
| 44375    | cct5; chaperonin containing TCP1, subunit 5 (epsilon); K09497 T-complex protein 1 subunit epsilon                                                                                          | 2.44                             | 0.64                              |
| 36525    | Claudin 30; n=1; Oreochromis mossambicus                                                                                                                                                   | 3.53                             | 0.52                              |
| 44448    | custom - CC chemokine                                                                                                                                                                      | 7.29                             | 0.43                              |
| 44544    | custom - Interferon regulatory factor 10K                                                                                                                                                  | 1.81                             | 0.64                              |
| 44547    | custom - Interferon regulatory factor 10K                                                                                                                                                  | 1.70                             | 0.71                              |
| 44546    | custom - Interferon regulatory factor 10K                                                                                                                                                  | 2.48                             | 0.54                              |
| 44543    | custom - Interferon regulatory factor 10K                                                                                                                                                  | 2.32                             | 0.44                              |
| 44550    | custom - interleukin-1 receptor-associated kinase 4                                                                                                                                        | 1.57                             | 0.73                              |
| 44579    | custom - Mitogen-activated protein kinase kinase 4                                                                                                                                         | 1.90                             | 0.60                              |
| 44588    | custom - probable ATP-dependent RNA helicase DHX                                                                                                                                           | 3.73                             | 0.34                              |
| 44584    | custom - probable ATP-dependent RNA helicase DHX                                                                                                                                           | 3.55                             | 0.44                              |
| 44587    | custom - probable ATP-dependent RNA helicase DHX                                                                                                                                           | 2.04                             | 0.48                              |
| 44624    | custom - viperin                                                                                                                                                                           | 3.03                             | 0.53                              |
| 36901    | DNA-directed RNA polymerase I subunit RPA49 (RNA polymerase I-associated factor 53) (RNA polymerase I polypeptide E) (RNA polymerase I-associated factor 1) (A49).; n=1; Takifugu rubripes | 1.32                             | 0.68                              |
| 44663    | Drf_FH1 multi-domain protein                                                                                                                                                               | 1.58                             | 0.73                              |
| 37498    | GTP-binding nuclear protein Ran; n=35; Euteleostomi                                                                                                                                        | 1.36                             | 0.65                              |
| 44859    | HECT domain containing protein                                                                                                                                                             | 5.92                             | 0.43                              |
| 37698    | Homolog of Brachydanio rerio Cyclin L ania-6a.; n=2; Takifugu rubripes                                                                                                                     | 1.70                             | 0.67                              |
| 37707    | Homolog of Brachydanio rerio Fem1c.; n=1; Takifugu rubripes                                                                                                                                | 1.62                             | 0.70                              |
| 37904    | Homolog of Gallus gallus Double-stranded RNA-activated protein kinase.; n=1; Takifugu rubripes                                                                                             | 2.52                             | 0.61                              |
| 38042    | Homolog of Homo sapiens Deoxyribonuclease gamma precursor; n=1; Takifugu rubripes                                                                                                          | 2.18                             | 0.44                              |
| 38160    | Homolog of Homo sapiens Membrane interacting protein of RGS16; n=1; Takifugu rubripes                                                                                                      | 1.71                             | 0.66                              |
| 38352    | Homolog of Homo sapiens SOUL protein; n=1; Takifugu rubripes                                                                                                                               | 2.34                             | 0.56                              |
| 38598    | Interferon regulatory factor 1; n=1; Channa argus                                                                                                                                          | 2.43                             | 0.55                              |
| 38611    | Interferon stimulated gene 15; n=1; Gadus morhua                                                                                                                                           | 5.90                             | 0.40                              |
| 38612    | Interferon stimulated gene 15; n=1; Gadus morhua                                                                                                                                           | 3.76                             | 0.55                              |
| 38604    | Interferon stimulated gene 15; n=1; Gadus morhua                                                                                                                                           | 5.62                             | 0.33                              |
| 38609    | Interferon stimulated gene 15; n=1; Gadus morhua                                                                                                                                           | 4.67                             | 0.37                              |
| 38606    | Interferon stimulated gene 15; n=1; Gadus morhua                                                                                                                                           | 5.20                             | 0.40                              |
| 38614    | Interferon stimulated gene 15; n=1; Gadus morhua                                                                                                                                           | 3.81                             | 0.52                              |
| 38613    | Interferon stimulated gene 15; n=1; Gadus morhua                                                                                                                                           | 8.45                             | 0.26                              |
| 38607    | Interferon stimulated gene 15; n=1; Gadus morhua                                                                                                                                           | 2.10                             | 0.59                              |

|       |                                                                                                                                                                                         |      |      |
|-------|-----------------------------------------------------------------------------------------------------------------------------------------------------------------------------------------|------|------|
| 38608 | Interferon stimulated gene 15; n=1; Gadus morhua                                                                                                                                        | 4.80 | 0.38 |
| 38605 | Interferon stimulated gene 15; n=1; Gadus morhua                                                                                                                                        | 5.58 | 0.39 |
| 38603 | Interferon stimulated gene 15; n=1; Gadus morhua                                                                                                                                        | 3.77 | 0.39 |
| 38638 | Interleukin-8 variant 2; n=3; Ictalurus punctatus                                                                                                                                       | 7.90 | 0.18 |
| 38639 | Interleukin-8 variant 2; n=3; Ictalurus punctatus                                                                                                                                       | 5.88 | 0.16 |
| 38651 | Intraflagellar transport protein 52; n=4; Danio rerio                                                                                                                                   | 6.19 | 0.29 |
| 38670 | Isoform 2 of Q5RI56 ; n=2; Danio rerio                                                                                                                                                  | 2.00 | 0.55 |
| 45123 | LOC501925; similar to solute carrier family 2, member 9 isoform a; K08146 MFS transporter, SP family, solute carrier family 2 (facilitated glucose transporter), member 9               | 1.62 | 0.58 |
| 45143 | LOC540789; similar to poly (ADP-ribose) polymerase family, member 14                                                                                                                    | 1.58 | 0.57 |
| 45146 | LOC555735; similar to DNA methyltransferase                                                                                                                                             | 1.62 | 0.56 |
| 45361 | LOC797694; similar to solute carrier family 25 member 5 protein                                                                                                                         | 3.78 | 0.15 |
| 39328 | NFX1-type zinc finger-containing protein 1; n=5; Eutheria                                                                                                                               | 2.67 | 0.41 |
| 39323 | NFX1-type zinc finger-containing protein 1.; n=1; Takifugu rubripes                                                                                                                     | 1.36 | 0.74 |
| 39325 | NFX1-type zinc finger-containing protein 1.; n=1; Takifugu rubripes                                                                                                                     | 1.96 | 0.55 |
| 39505 | Novel protein similar to vertebrate phosphoribosyl pyrophosphate amidotransferase; n=3; Danio rerio                                                                                     | 1.68 | 0.58 |
| 39626 | Novel protein; n=2; Danio rerio                                                                                                                                                         | 1.60 | 0.68 |
| 40263 | PREDICTED: similar to bloodthirsty; n=3; Danio rerio                                                                                                                                    | 1.70 | 0.72 |
| 40670 | PREDICTED: similar to mitochondrial carrier triple repeat 6; n=1; Monodelphis domestica                                                                                                 | 1.93 | 0.54 |
| 41014 | PREDICTED: similar to Snf2-related CBP activator protein; n=1; Mus musculus                                                                                                             | 2.08 | 0.49 |
| 41103 | PREDICTED: similar to transposase, partial; n=1; Strongylocentrotus purpuratus                                                                                                          | 2.04 | 0.68 |
| 41269 | PREDICTED: similar to zinc finger, NFX1-type containing 1; n=3; Laurasiatheria                                                                                                          | 5.56 | 0.46 |
| 41314 | Probable ATP-dependent helicase LGP2 (EC 3.6.1.-) (Protein D11Lgp2 homolog.); n=1; Takifugu rubripes                                                                                    | 3.77 | 0.41 |
| 41316 | Probable ATP-dependent helicase LGP2 (EC 3.6.1.-) (Protein D11Lgp2 homolog.); n=1; Takifugu rubripes                                                                                    | 5.61 | 0.37 |
| 41829 | RFK protein; n=2; Bos taurus                                                                                                                                                            | 2.77 | 0.50 |
| 42028 | Secernin 3; n=3; Tetraodontidae                                                                                                                                                         | 1.44 | 0.40 |
| 42073 | Serine hydrolase-like protein 2 (EC 3.1.-.-); n=1; Takifugu rubripes                                                                                                                    | 2.93 | 0.31 |
| 42375 | SRY-box containing gene 11a; n=1; Gnathonemus petersii                                                                                                                                  | 1.47 | 0.76 |
| 42860 | Type II inositol-1,4,5-trisphosphate 5-phosphatase precursor (EC 3.1.3.36) (Phosphoinositide 5-phosphatase) (5PTase) (75 kDa inositol polyphosphate-5-phosphatase.); n=2; Gallus gallus | 1.56 | 0.52 |
| 48258 | Unassigned protein                                                                                                                                                                      | 2.72 | 0.64 |
| 47368 | Unassigned protein                                                                                                                                                                      | 1.57 | 0.72 |
| 47613 | Unassigned protein                                                                                                                                                                      | 1.76 | 0.37 |
| 46586 | Unassigned protein                                                                                                                                                                      | 2.02 | 0.54 |
| 47806 | Unassigned protein                                                                                                                                                                      | 2.02 | 0.47 |
| 47164 | Unassigned protein                                                                                                                                                                      | 6.72 | 0.50 |
| 47445 | Unassigned protein                                                                                                                                                                      | 1.59 | 0.27 |
| 54421 | unclassified                                                                                                                                                                            | 2.04 | 0.55 |
| 53852 | unclassified                                                                                                                                                                            | 2.13 | 0.64 |
| 52069 | unclassified                                                                                                                                                                            | 3.13 | 0.48 |
| 49575 | unclassified                                                                                                                                                                            | 2.52 | 0.49 |
| 49723 | unclassified                                                                                                                                                                            | 1.60 | 0.48 |
| 51353 | unclassified                                                                                                                                                                            | 1.89 | 0.57 |
| 50298 | unclassified                                                                                                                                                                            | 1.45 | 0.53 |
| 51171 | unclassified                                                                                                                                                                            | 2.32 | 0.50 |
| 51636 | unclassified                                                                                                                                                                            | 2.19 | 0.47 |

|       |                                                       |      |      |
|-------|-------------------------------------------------------|------|------|
| 52606 | unclassified                                          | 1.71 | 0.69 |
| 52488 | unclassified                                          | 1.80 | 0.57 |
| 55314 | unclassified                                          | 1.98 | 0.68 |
| 52706 | unclassified                                          | 1.88 | 0.60 |
| 43012 | UPI0000D8BA1C related cluster; n=1; Danio rerio       | 1.84 | 0.58 |
| 43192 | Vesicular glutamate transporter 2.2; n=3; Danio rerio | 2.15 | 0.56 |
| 43197 | VHSV-induced protein; n=1; Oncorhynchus mykiss        | 3.13 | 0.64 |
| 43201 | Viperin-like protein; n=1; Channa argus               | 5.43 | 0.41 |
| 43642 | Zgc:152953; n=2; Danio rerio                          | 1.84 | 0.61 |
| 44015 | Zgc:86905; n=1; Danio rerio                           | 1.52 | 0.66 |
| 44180 | ZPC4; n=2; Oryzias latipes                            | 5.24 | 0.20 |

---

<sup>a</sup>Fold-changes are presented as outputted by siggenes and were calculated as 16°C/10°C
