# Supplementary material for: A moderate increase in ambient temperature modulates the Atlantic cod (Gadus morhua) spleen transcriptome response to intraperitoneal viral mimic injection
Source: PubMed Central journal article supplement (PMC3534563; doi:10.1186/1471-2164-13-431), 2012-08-28
Supplement: 1471-2164-13-431-S2.pdf [file 1471-2164-13-431-S2.pdf]

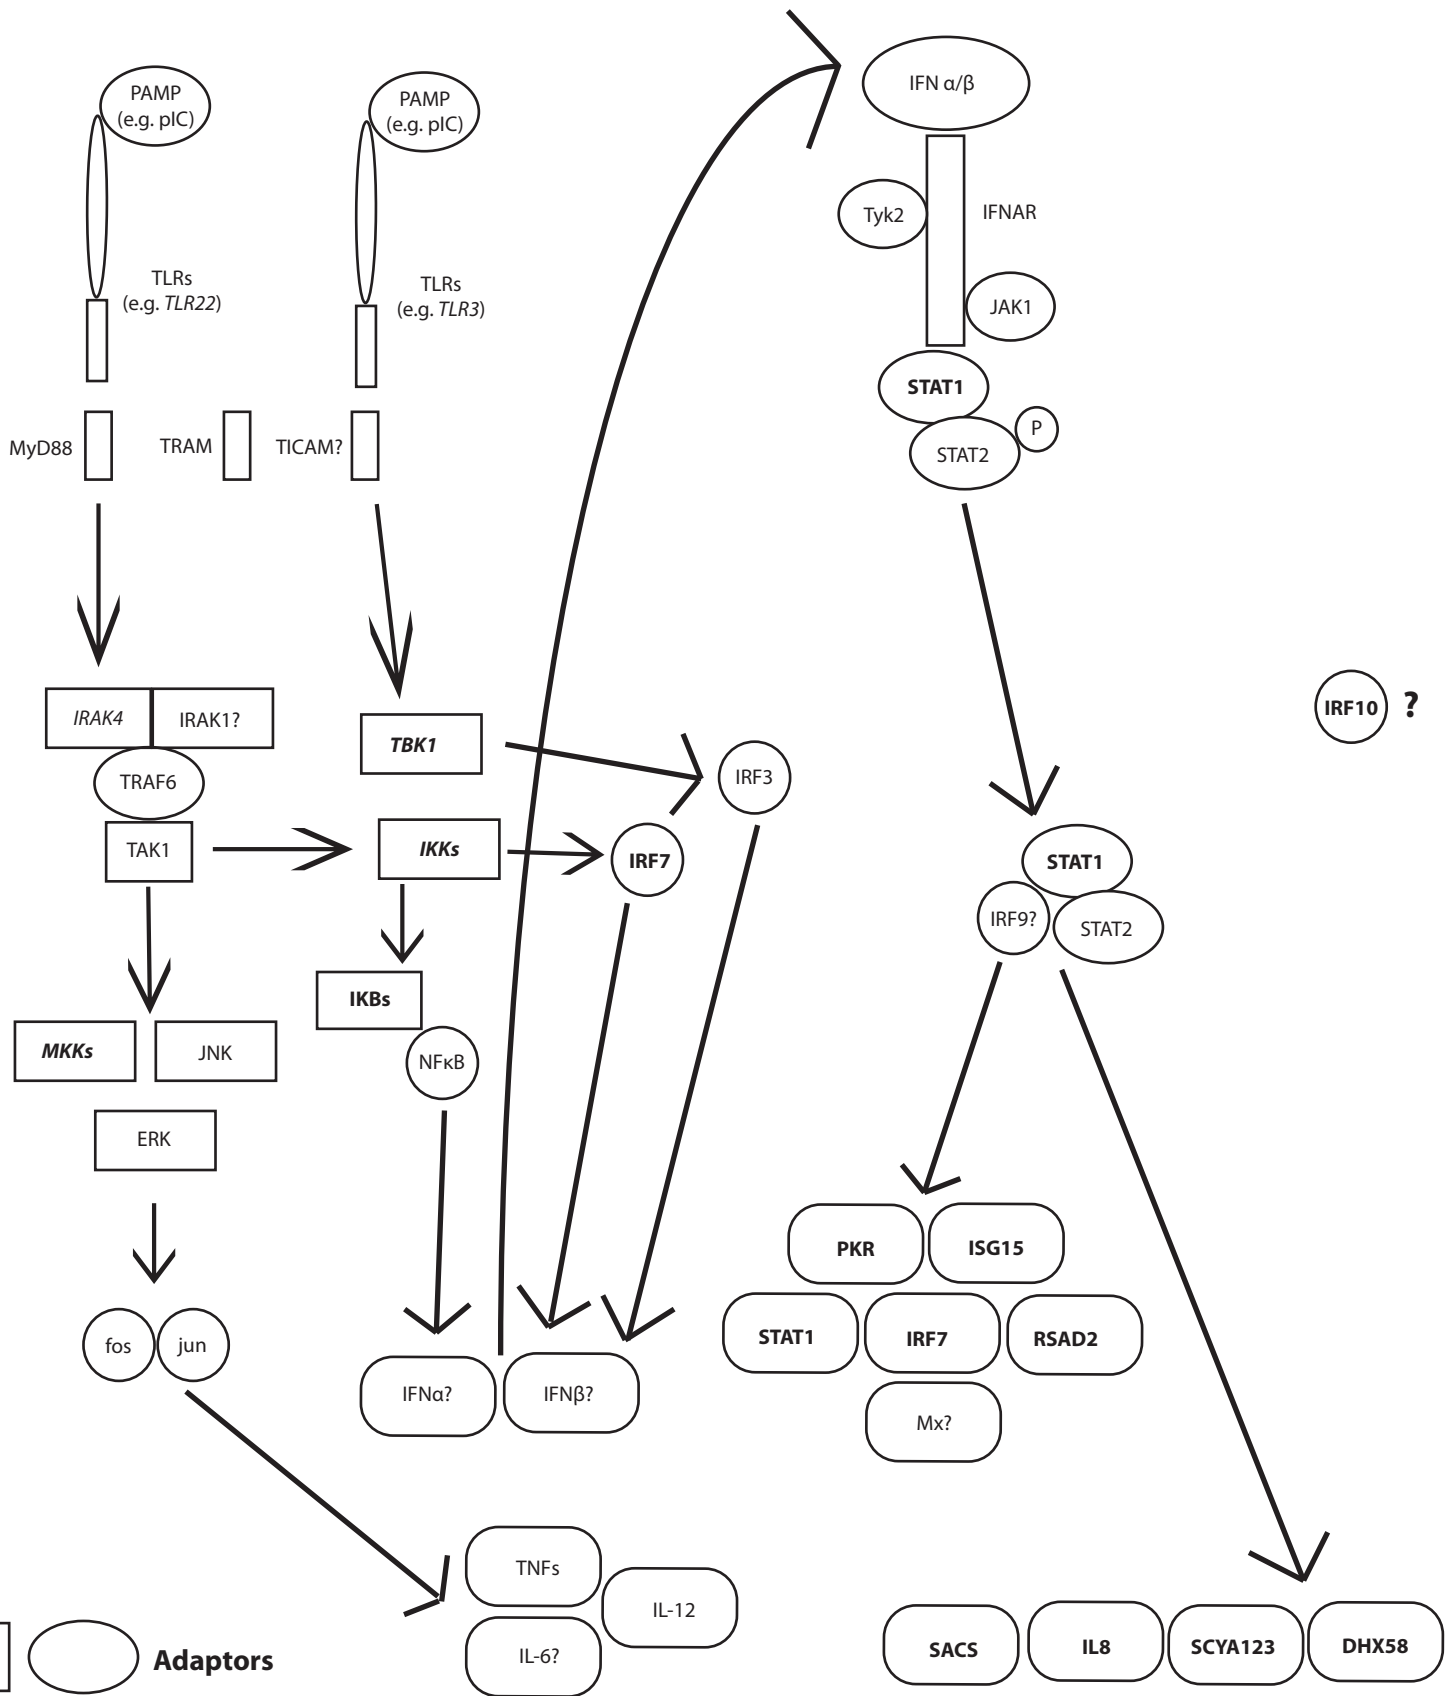

  **Adaptors**

 **Kinases**

 **Transcription Factors**

 **Interferon stimulated genes and/or immune effectors**

Supplemental Figure 1 - Putative type I interferon activation via Toll-like receptors (TLRs) in Atlantic cod. Figure adapted from Rebl et al. [41] and Noppert et al. [54]. The orthology between same-named Atlantic cod and mammalian genes must be validated, and all gene interactions (represented by arrows) are based on the mammalian literature and must be confirmed by experimental research for Atlantic cod. Genes in bold were identified as significantly differentially expressed in at least one microarray comparison and confirmed by QPCR; genes in bold-italics were identified as significantly differentially expressed in at least one microarray comparison but were not subjected to QPCR; genes in italics were identified as significantly differentially expressed in at least one microarray comparison and were subjected but not confirmed by QPCR. A question mark beside a gene indicates that it could not be found by nominal search in either the Ensembl annotation of the Atlantic Cod genome ([http://ensembl.org/Gadus\\_morhua](http://ensembl.org/Gadus_morhua)) or the Atlantic Cod Genomics and Broodstock Development Project EST database (<http://www.codgene.ca>). The bold question mark indicates genes found in Atlantic Cod with no known human orthologs. PAMP = pathogen associated molecular pattern; pIC = polyriboinosinic polyribocytidylic acid; TRL = Toll-like receptor; MyD88 = Myeloid differentiation primary response gene (88); TRAM = TRIF-related adaptor molecule; TICAM = TIR domain-containing adaptor molecule; IRAK = Interleukin-1 receptor associated kinase; TAK1 = TGF-beta activated kinase 1; TRAF6 = TNF receptor-associated factor 6, E3 ubiquitin protein ligase; TBK1 = TANK-binding kinase 1; IKK = Inhibitor of NFκB kinases; IRF = Interferon regulatory factor; IKB = Inhibitor of NFκB; NFκB = Nuclear factor of kappa gene enhancer in B cells; MKK = Mitogen activated protein kinase; ERK = Extracellular signal-regulated kinase; JNK = JUN n-terminal kinase; IFN = Interferon; fos = FBJ murine osteosarcoma viral oncogene homolog; jun = JUN proto-oncogene; IFNAR = Interferon (alpha, beta and omega) receptor; Tyk2 = Tyrosine kinase 2; JAK1 = Janus kinase 1 ; STAT = Signal transducer and activator of transcription; PKR = Double-stranded RNA activate protein kinase; ISG = Interferon stimulated gene; RSAD2 = Radical-S-adenosyl containing methionine domain containing 2; Mx = Myxovirus (influenza virus) resistance, interferon-inducible protein; SACS = Sacsin; IL = Interleukin; SCYA = Small-inducible chemokine; DHX58 = DEXH (Asp-Glu-X-His) box polypeptide 58; TNF = Tumor necrosis factor.
